# Supplementary material for: Palladium-catalyzed addition of acylsilanes across alkynesviathe activation of a C–Si bond
Source: Royal Society of Chemistry journal article supplement (doi:10.1039/d3sc00181d), 2023-01-01

## Supporting Information

for

### Palladium-Catalyzed Addition of Acylsilanes across Alkynes via the Activation of a C–Si Bond

Tetsuya Inagaki,<sup>a</sup> Takahiro Ando,<sup>a</sup> Shun Sakurai,<sup>a</sup> Masahiro Yamanaka\*<sup>c</sup> and Mamoru Tobisu\*<sup>a,b</sup>

<sup>a</sup>*Department of Applied Chemistry, Graduate School of Engineering, Osaka University, Suita, Osaka 565-0871, Japan*

<sup>b</sup>*Innovative Catalysis Science Division, Institute for Open and Transdisciplinary Research Initiatives (ICS-OTRI), Osaka University, Suita, Osaka 565-0871, Japan.*

<sup>c</sup>*Department of Chemistry, Faculty of Science, Rikkyo University, 3-34-1 Nishi-Ikebukuro, Toshima-ku, Tokyo 171-8501, Japan*  
*myamanak@rikkyo.ac.jp; tobisu@chem.eng.osaka-u.ac.jp*

## CONTENTS

|             |                                                                   |            |
|-------------|-------------------------------------------------------------------|------------|
| <b>I</b>    | <b>General Information</b>                                        | <b>S2</b>  |
| <b>II</b>   | <b>Materials</b>                                                  | <b>S2</b>  |
| <b>III</b>  | <b>Typical Procedures</b>                                         | <b>S3</b>  |
| <b>IV</b>   | <b>Optimization Studies</b>                                       | <b>S3</b>  |
| <b>V</b>    | <b>Mechanistic Studies</b>                                        | <b>S7</b>  |
| <b>VI</b>   | <b>Spectroscopic Data</b>                                         | <b>S9</b>  |
| <b>VII</b>  | <b>DFT Calculations</b>                                           | <b>S31</b> |
| <b>VIII</b> | <b>Cartesian Coordinates and Energies of Optimized Structures</b> | <b>S35</b> |
| <b>IX</b>   | <b>References</b>                                                 | <b>S65</b> |
| <b>X</b>    | <b>Copies of <sup>1</sup>H and <sup>13</sup>C NMR Spectra</b>     | <b>S67</b> |

## I. General Information

$^1\text{H}$  NMR,  $^{13}\text{C}$  NMR,  $^{19}\text{F}$  NMR and  $^{29}\text{Si}$  NMR spectra were recorded on a JEOL ECS-400 spectrometer in  $\text{CDCl}_3$  or  $\text{C}_6\text{D}_6$ . The chemical shifts in  $^1\text{H}$  NMR spectra were recorded relative to  $\text{CHCl}_3$  ( $\delta$  7.26) or  $\text{C}_6\text{H}_6$  ( $\delta$  7.15). The chemical shifts in  $^{13}\text{C}$  NMR spectra were recorded relative to  $\text{CDCl}_3$  ( $\delta$  77.00) or  $\text{C}_6\text{D}_6$  ( $\delta$  128.00). The chemical shifts in  $^{19}\text{F}$  NMR spectra were recorded relative to perfluorobenzene (-163.0 ppm).  $^{29}\text{Si}$  NMR spectra were recorded relative to tetramethylsilane (0.0 ppm). Data are reported as follows: chemical shift ( $\delta$ ) in ppm, multiplicity (s = singlet, d = doublet, t = triplet, q = quartet, quint = quintet, m = multiplet), coupling constant ( $J$ ) in Hz, and integration. The data is reported as follows: chemical shift ( $\delta$ ) in ppm, coupling constant (Hz), and integration. Infrared spectra (IR) were obtained using a JASCO FT/IR-4200 spectrometer. Absorption is reported in reciprocal centimeters ( $\text{cm}^{-1}$ ) with the following relative intensities: s (strong), m (medium), or w (weak). Mass spectra and high-resolution mass spectra (HRMS) were obtained on a JEOL JMS-700 spectrometer or JMS-T100LP. Analytical gas chromatography (GC) was carried out on a Shimadzu GC-2014 gas chromatograph, equipped with a flame ionization detector. Column chromatography was performed with  $\text{SiO}_2$  (Silica Gel 60 N (spherical, neutral) (40-50  $\mu\text{m}$ ), (KANTO CHEMICAL CO., INC.).

## II. Materials

$\text{Pd}_2(\text{dba})_3$  (Aldrich), IPr (TCI), **2a** (TMO), **2b** (Wako), **2c** (Wako), **2f** (TCI), **2g** (TCI), **2j** (TCI) and toluene (Wako) were purchased from the commercial suppliers and used as received. Acylsilane **1a** [CAS: 5908-41-8] was prepared from benzyltrimethylsilane (TCI) according to the literature method.<sup>1</sup> Acylsilanes **1b** [CAS: 75748-09-3], **1c** [CAS: 75748-12-8], **1d** [CAS: 144968-85-4], **1e** [CAS: 107325-81-5], **1f** [CAS: 1354579-01-3] and **1g** [CAS: 22364-54-1] were prepared from the corresponding acyl chlorides according to the literature methods.<sup>2</sup> Alkyne **2d** [CAS: 1016981-17-1] was prepared from phenethylacetylene and ethyl chloroformate according to the literature method.<sup>3</sup> Alkyne **2e** [CAS: 33547-94-3] was prepared from ethynylcyclohexane and ethyl chloroformate according to the literature method.<sup>4</sup> Alkynes **2h** [CAS: 207225-49-8] and **2i** [CAS: 2464939-88-4] were prepared from but-2-ynoic acid and the corresponding alcohols according to the literature method.<sup>5</sup> Alkynes **2k** [CAS: 51718-85-5], **2l** [CAS: 1736-31-8] and **2p** [CAS: 58686-71-8] were prepared from the corresponding ethynylarenes and ethyl chloroformate according to the literature method.<sup>6</sup> Alkynes **2m** [CAS: 61354-73-2] and **2o** [CAS: 906820-21-1] were prepared from the corresponding aryl iodides and ethyl propiolate according to the literature method.<sup>7</sup> Alkyne **2n** [CAS: 946420-91-3] was prepared from 4-phenyl-1-butyne and pivaloyl chloride according to the literature method.<sup>8</sup> Alkyne **2q** [CAS: 124235-10-5] was prepared from 1-hexyne and dimethylcarbamic chloride according to the literature method.<sup>9</sup>

### III. Typical Procedures

#### Method A: Procedure for the Palladium-Catalyzed Silylacylation of Alkyne **2a** Using Acylsilane **1a**.

In a glovebox filled with nitrogen, Pd<sub>2</sub>(dba)<sub>3</sub> (9.2 mg, 0.010 mmol), IPr (7.8 mg, 0.020 mmol), acylsilane **1a** (71 mg, 0.4 mmol), and alkyne **2a** (37 mg, 0.22 mmol) were added to a 10 mL-sample vial with a teflon-sealed screwcap. Toluene (0.6 mL) was then added, and the vial was sealed with the cap. The vial was stirred at 60 °C for 17 h. After allowing the mixture to cool to rt, the crude mixture was filtered through a pad of Celite, and the pad was washed with EtOAc. The filtrate was analyzed by GC using dodecane as an internal standard. The filtrate was concentrated in vacuo and purified by flash column chromatography over silica gel (elution with hexane/EtOAc = 10/1) to give **3aa** as a yellow oil (63 mg, 83% yield).

#### Method B: Procedure for the Palladium-Catalyzed Synthesis of Indanone Derivatives Using Acylsilane **1a** and alkyne **2j**.

In a glovebox filled with nitrogen, Pd<sub>2</sub>(dba)<sub>3</sub> (9.2 mg, 0.010 mmol), IPr (7.8 mg, 0.020 mmol), acylsilane **1a** (37 mg, 0.21 mmol), and alkyne **2j** (41.8 mg, 0.24 mmol) were added to a 10 mL-sample vial with a teflon-sealed screwcap. Toluene (0.6 mL) was then added, and the vial was sealed with the cap. The vial was stirred at 140 °C for 17 h. After allowing the mixture to cool to rt, the crude mixture was filtered through a pad of Celite, and the pad was washed with EtOAc. The filtrate was analyzed by GC using dodecane as an internal standard. The filtrate was concentrated in vacuo and purified by flash column chromatography over silica gel (elution with hexane/EtOAc = 10/1) to give **4aj** as a yellow oil (50 mg, 87% yield).

### IV. Optimization Studies

#### IV-1. Screening of Alkynes

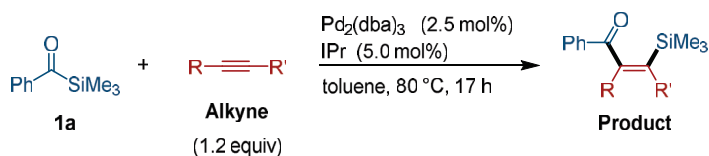

| Entry | Alkyne | GC yield (%) <sup>a</sup> |                        |
|-------|--------|---------------------------|------------------------|
|       |        | 1a                        | Product                |
| 1     | 2b     | >99                       | 0                      |
| 2     | 2c     | 62                        | trace                  |
| 3     | S1     | 48                        | 5                      |
| 4     | S2     | 78                        | 2                      |
| 5     | S3     | 65                        | trace                  |
| 6     | S4     | >99                       | 0                      |
| 7     | S5     | 92                        | 0                      |
| 8     | S6     | 57                        | 0                      |
| 9     | S7     | 49                        | 25 (4.7:1)             |
| 10    | 2j     | 15                        | 46(1.4:1) <sup>b</sup> |

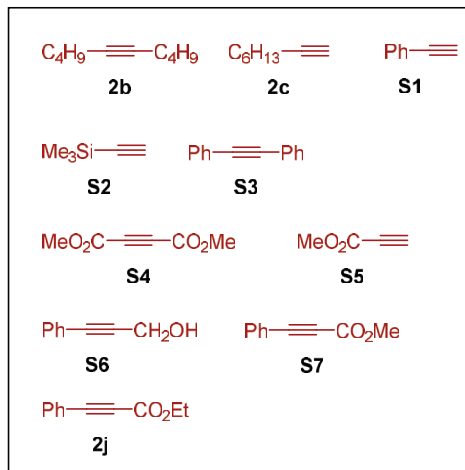

<sup>a</sup>The yield was estimated by GC analysis using dodecane as an internal standard unless otherwise noted. <sup>b</sup>Run at 100 °C.

#### IV-2. Effect of Ligands

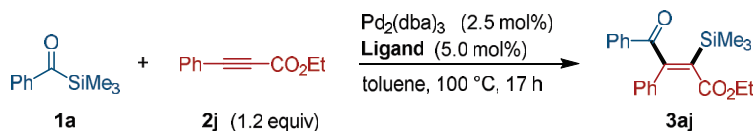

| Entry | Ligand                                        | GC yield (%) <sup>a</sup> |            |
|-------|-----------------------------------------------|---------------------------|------------|
|       |                                               | 1a                        | 3aj        |
| 1     | IPr                                           | 15                        | 46 (1.4:1) |
| 2     | IMes•HCl + <sup>t</sup> BuONa                 | 31                        | 31 (0.4:1) |
| 3     | IMes <sup>Me</sup> •HCl + <sup>t</sup> BuONa  | 18                        | 27 (0.7:1) |
| 4     | ICy•HBF <sub>4</sub> + <sup>t</sup> BuONa     | 61                        | 0          |
| 5     | I(1-Ad)•HBF <sub>4</sub> + <sup>t</sup> BuONa | 63                        | 0          |
| 6     | RuPhos                                        | 65                        | 0          |
| 7     | BrettPhos                                     | 64                        | 0          |
| 8     | PCy <sub>3</sub>                              | 45                        | 35 (0.6:1) |
| 9     | PPh <sub>3</sub>                              | 0                         | 2          |
| 10    | P <sup>t</sup> Bu <sub>3</sub>                | 56                        | 0          |
| 11    | P <sup>n</sup> Bu <sub>3</sub>                | 42                        | 35 (0.1:1) |
| 12    | 2,2'-bipyridine                               | 66                        | 0          |
| 13    | IPr, w/o Pd <sub>2</sub> (dba) <sub>3</sub>   | 54                        | 0          |

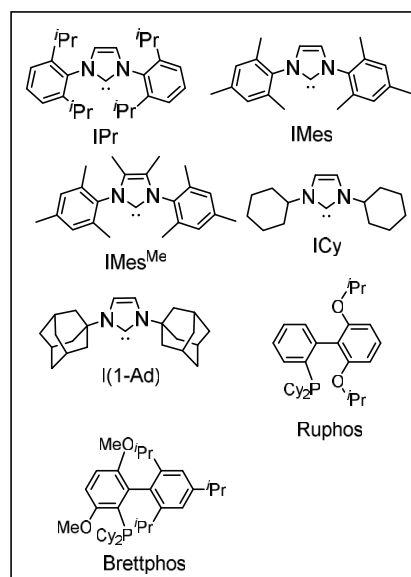

<sup>a</sup>The yield was estimated by GC analysis using dodecane as an internal standard unless otherwise noted.

### IV-3. Effect of Amounts of Substrates

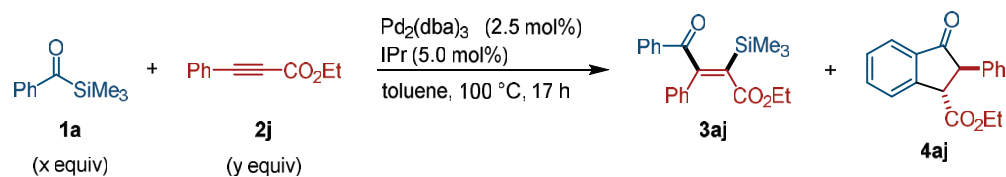

| Entry | Equiv |     | Yield (%)              |                         |                 |
|-------|-------|-----|------------------------|-------------------------|-----------------|
|       | x     | y   | <b>1a</b> or <b>2j</b> | <b>3aj</b>              | <b>4aj</b>      |
| 1     | 3     | 1   | 0                      | 68 (2.0:1) <sup>a</sup> | 25 <sup>a</sup> |
| 2     | 2     | 1   | 0                      | 67 (6.7:1) <sup>a</sup> | 17 <sup>a</sup> |
| 3     | 1.5   | 1   | 16 <sup>b</sup>        | 47 (>10:1) <sup>b</sup> | 5 <sup>b</sup>  |
| 4     | 1.2   | 1   | 8 <sup>b</sup>         | 53 (9:1) <sup>b</sup>   | 6 <sup>b</sup>  |
| 5     | 1     | 1.2 | 15 <sup>b</sup>        | 46 (1.4:1) <sup>b</sup> | 9 <sup>b</sup>  |
| 6     | 1     | 2   | 65 <sup>b</sup>        | 0                       | 0               |
| 7     | 1     | 3   | 64 <sup>b</sup>        | 0                       | 0               |

<sup>a</sup>Isolated yield. <sup>b</sup>The yield was estimated by GC analysis using dodecane as an internal standard unless otherwise noted.

### IV-4. Effect of Temperature

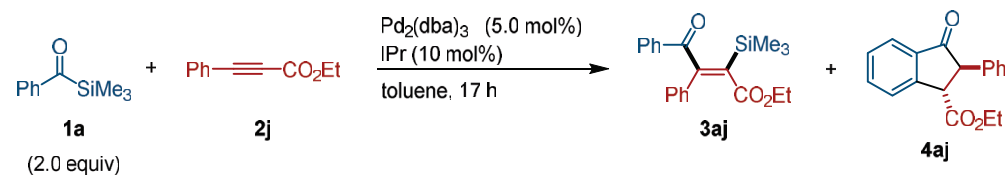

| Entry | Temperature         | Yield (%)       |                         |                 |
|-------|---------------------|-----------------|-------------------------|-----------------|
|       |                     | <b>2j</b>       | <b>3aj</b>              | <b>4aj</b>      |
| 1     | RT                  | 70 <sup>a</sup> | 0                       | 0               |
| 2     | 40 °C               | 74 <sup>a</sup> | 13 <sup>a</sup>         | 0               |
| 3     | 60 °C               | 0               | 60 (1.5:1) <sup>b</sup> | 12 <sup>b</sup> |
| 4     | 80 °C <sup>c</sup>  | 0               | 63 (2.3:1) <sup>b</sup> | 21 <sup>b</sup> |
| 5     | 100 °C <sup>c</sup> | 0               | 67 (6.7:1) <sup>b</sup> | 17 <sup>b</sup> |
| 6     | 140 °C <sup>c</sup> | 0               | 40 <sup>b</sup>         | 19 <sup>b</sup> |
| 7     | 140 °C <sup>d</sup> | 0               | 0                       | 87 <sup>b</sup> |

<sup>a</sup>The yield was estimated by GC analysis using dodecane as an internal standard unless otherwise noted. <sup>b</sup>Isolated yield. <sup>c</sup>Pd<sub>2</sub>(dba)<sub>3</sub> (2.5 mol%) and IPr (5.0 mol%) were used. <sup>d</sup>Acylsilane **1a** (1.0 equiv) and alkyne **2j** (1.2 equiv) was used.

### IV-5. Effect of Catalyst Loading for the Palladium-Catalyzed Silylacylation

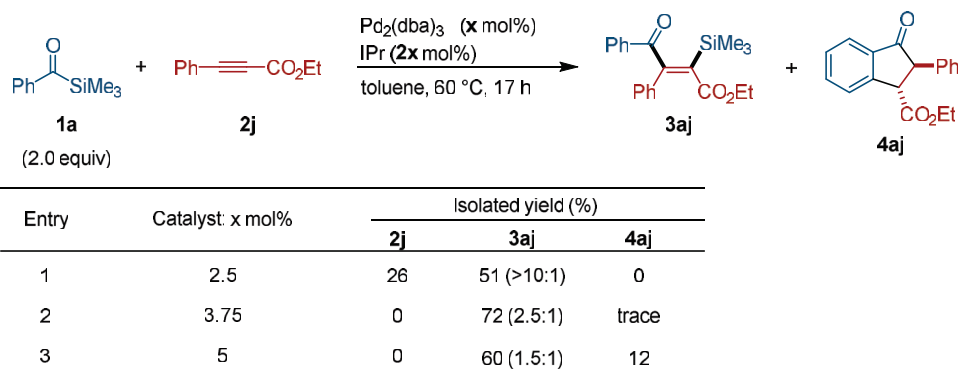

#### IV-6. Effect of Catalyst Loading for the Palladium-Catalyzed Synthesis of Indanone Derivatives

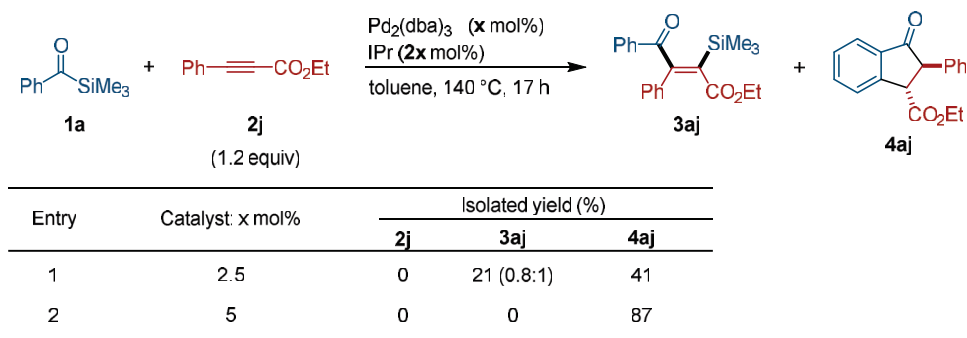

#### IV-7. The Palladium-Catalyzed Silylacetylation under a Shading Condition<sup>a</sup>

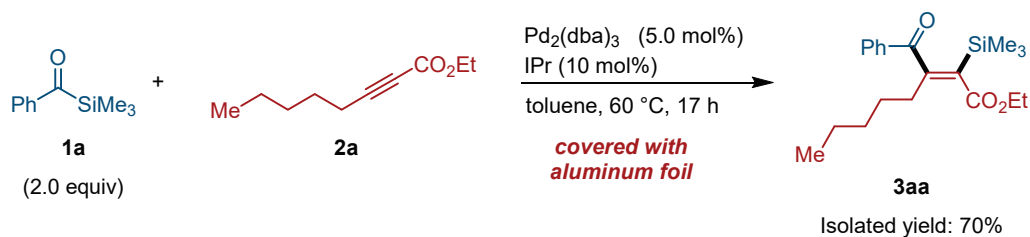

<sup>a</sup>The reaction was performed in the absence of any light by covering the reaction vessel with aluminum foil.

## V. Mechanistic Studies

### V-1. Dependence of *Z/E* ratio on the reaction time

We investigated the *cis/trans* ratio as a function of reaction time and found that the *cis* addition product was produced selectively and that it then isomerized to the *trans* product as the reaction mixture was heated longer (Table S1). Isolated (*Z*)-**3aj**, in fact, isomerized to give a mixture of isomers when exposed to the palladium-catalyzed conditions, whereas (*Z*)-**3aj** did not isomerize in the absence of the catalyst (Eq. S1). Therefore, the isomerization process was promoted by a palladium catalyst, possibly via an addition/elimination mechanism.

Table S1. Dependence of *Z/E* ratio on the reaction time.

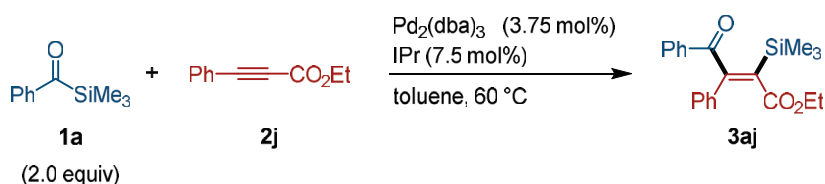

| Entry | Reaction time | Yield (%)       |                                |
|-------|---------------|-----------------|--------------------------------|
|       |               | <b>2j</b>       | <b>3aj</b> ( <i>Z/E</i> ratio) |
| 1     | 4 h           | 19 <sup>a</sup> | 53 (31:1) <sup>a</sup>         |
| 2     | 17 h          | 0               | 72 (2.5:1) <sup>b</sup>        |

<sup>a</sup>The yield was estimated by NMR analysis using mesitylene as an internal standard using Pd<sub>2</sub>(dba)<sub>3</sub> (5.0 mol%) and IPr (10 mol%). <sup>b</sup>Isolated yield.

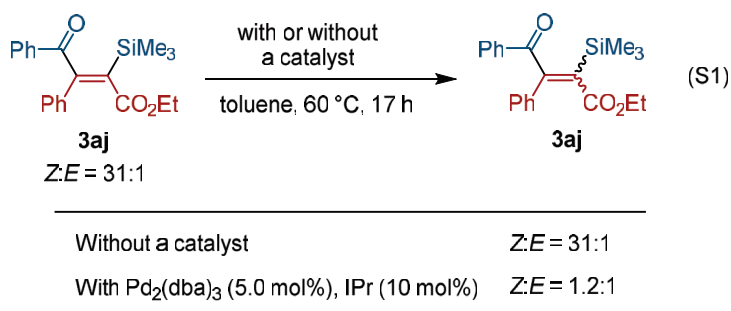

### V-2. Observation of Silyl Enol Ether **4aj'** and Its Decomposition

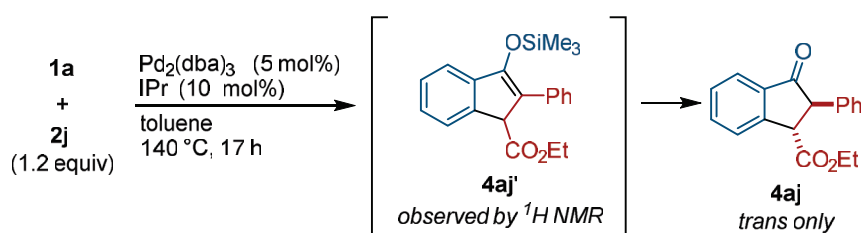

In a glovebox filled with nitrogen,  $\text{Pd}_2(\text{dba})_3$  (9.2 mg, 0.010 mmol), IPr (7.8 mg, 0.020 mmol), acylsilane **1a** (35 mg, 0.20 mmol), and alkyne **2j** (41.8 mg, 0.24 mmol) were added to a 10 mL-sample vial with a teflon-sealed screwcap. Toluene (0.6 mL) was then added, and the vial was sealed with the cap. The vial was stirred at 140 °C for 17 h. After allowing the mixture cool to rt, the crude mixture was concentrated in a glovebox. The residue was dissolved in  $\text{C}_6\text{D}_6$  and analyzed by NMR using mesitylene as an internal standard, which revealed that the silyl enol ether **4aj'** was formed (NMR yield: 75%). The crude mixture was then filtered through a pad of Celite under an atmosphere of air, and the pad was washed with EtOAc. The filtrate was concentrated in vacuo and analyzed by NMR, which indicated that the indanone **4aj** was formed (NMR yield: 59%).

#### Ethyl 2-phenyl-3-((trimethylsilyl)oxy)-1H-indene-1-carboxylate (**4aj'**).

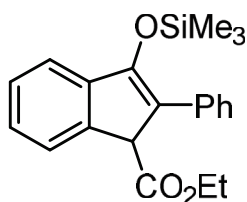

$^1\text{H NMR}$  ( $\text{C}_6\text{D}_6$ , 399.78 MHz):  $\delta$  7.79–7.76 (m, 2H), 7.50–7.48 (m, 1H), 7.33–7.32 (m, 1H), 7.17–7.09 (m, 3H), 7.06–6.96 (m, 2H), 4.67 (s, 1H), 3.83–3.75 (m, 1H), 3.67–3.59 (m, 1H), 0.62 (t,  $J = 6.9$  Hz, 3H), 0.05 (s, 9H).

$^{13}\text{C NMR}$  ( $\text{C}_6\text{D}_6$ , 100.53 MHz):  $\delta$  171.0, 152.0, 142.8, 139.6, 135.5, 129.3, 128.6, 127.7, 126.7, 126.6, 123.5, 122.5, 119.2, 60.9, 53.9, 13.9, 0.7.

IR (ATR): 3026 w, 2921 w, 1734 s, 1726 s, 1604 m, 1496 s, 1457 w, 1366 m, 1254 w, 1217 w, 1079 w, 1030 w, 850 m, 759 m, 729 s, 695 s, 465 w, 409 w.

MS  $m/z$  (% relative intensity): 352 ( $\text{M}^+$ , 33), 280 (21), 279 (81), 73 (100), 45 (10).

HRMS (DART+,  $[\text{M}+\text{H}]^+$ ): Calcd for  $\text{C}_{21}\text{H}_{25}\text{O}_3\text{Si}$  353.1568, Found 353.1564.

#### V-3. Pd-Catalyzed Conversion of **3aj** to **4aj**

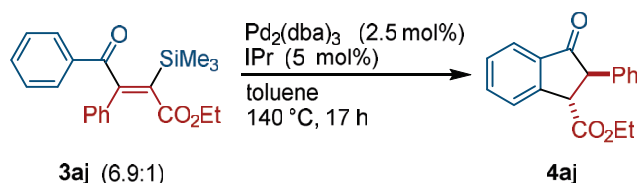

In a glovebox filled with nitrogen,  $\text{Pd}_2(\text{dba})_3$  (13.7 mg, 0.015 mmol), IPr (11.7 mg, 0.030 mmol),



silylacylation product **3aj** (118 mg, 0.34 mmol) were added to a 10 mL-sample vial with a teflon-sealed screwcap. Toluene (0.9 mL) was then added, and the vial was sealed with the cap. The vial was stirred at 140 °C for 17 h. After allowing the mixture to cool to rt, the crude mixture was filtered through a pad of Celite, and the pad was washed with EtOAc. The filtrate was analyzed by GC using dodecane as an internal standard. The filtrate was concentrated in vacuo and purified by flash column chromatography over silica gel (elution with hexane/EtOAc = 10/1) to give **4aj** as a yellow oil (49.1 mg, 52% yield).

#### V-4. Catalyst Screening for The Synthesis of Indanone Derivatives

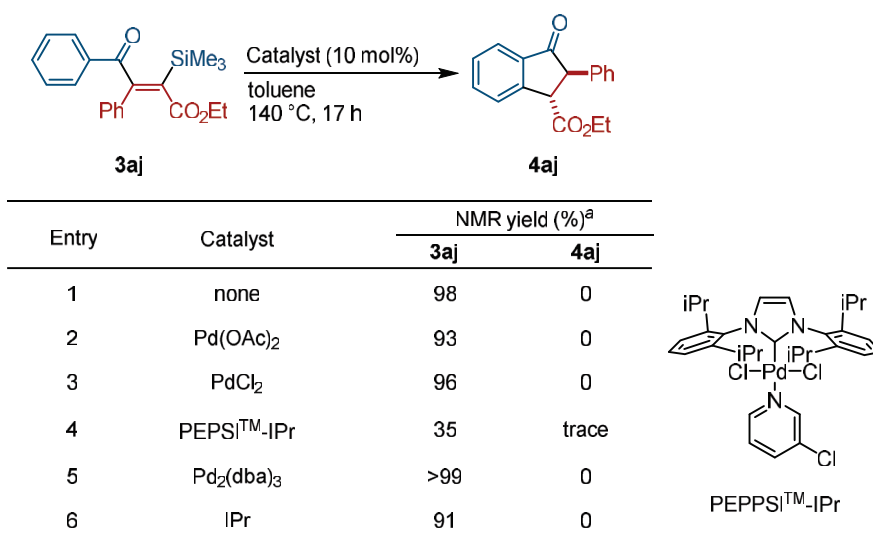

<sup>a</sup>The yield was estimated by NMR analysis using mesitylene as an internal standard.

## VI. Spectroscopic Data

### VI-1. Silylacylation Products

Ethyl (*Z*)-3-benzoyl-2-(trimethylsilyl)oct-2-enoate (**3aa**).

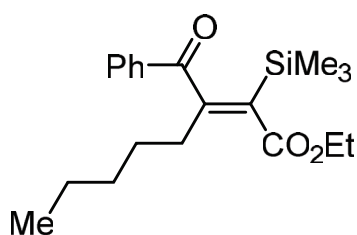

Method A was followed.

R<sub>f</sub> 0.37 (hexane/EtOAc = 10/1). Yellow oil (63.1 mg, 83%).

The product was obtained as a mixture of the title compound and its isomers (7.0:1) determined by <sup>1</sup>H NMR.

<sup>1</sup>H NMR (CDCl<sub>3</sub>, 399.78 MHz): δ 7.93–7.91 (m, 2H), 7.60–7.56 (m, 1H), 7.50–7.46 (m, 2H), 4.26 (q, *J* = 7.2 Hz, 2H), 2.41–2.37 (m, 2H), 1.39–1.31 (m, 5H), 1.21–1.17 (m, 4H), 0.82–0.75 (m, 3H), -0.01 (s, 9H).

<sup>13</sup>C NMR (CDCl<sub>3</sub>, 100.53 MHz): δ 198.8, 171.3, 154.9, 137.7, 135.9, 133.6, 129.6, 128.5, 60.5, 34.6, 31.5, 27.7, 22.2, 14.4, 13.8, -0.7.

<sup>29</sup>Si NMR (CDCl<sub>3</sub>, 79.43 MHz): δ -5.1.

IR (ATR): 2955 m, 2932 m, 2871 w, 1715 s, 1671s, 1597 w, 1558 w, 1522 w, 1472 w, 1449 w, 1250 s, 1214 s, 1175 w, 1038 m, 956 w, 844 s, 717 w, 693 w.

MS *m/z* (% relative intensity): 346 (M<sup>+</sup>, 3), 331 (13), 301 (13), 300 (15), 289 (11), 285 (33), 258 (11), 217 (11), 135 (16), 123 (37), 105 (83), 103 (59), 77 (51), 75 (71), 73 (100), 67 (17), 59 (17), 55 (11), 45 (14).

HRMS (DART<sup>+</sup>, [M+H]<sup>+</sup>): Calcd for C<sub>20</sub>H<sub>31</sub>O<sub>3</sub>Si 347.2037, Found 347.2039.

#### **Ethyl (*Z*)-3-benzoyl-5-phenyl-2-(trimethylsilyl)pent-2-enoate (**3ad**).**

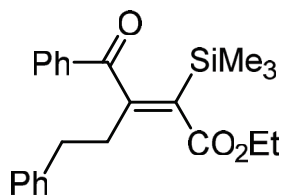

Method A was followed using **2d** (38.6 mg, 0.19 mmol) and **1a** (71.2 mg, 0.40 mmol).

R<sub>f</sub> 0.29 (hexane/EtOAc = 10/1). Pale yellow oil (49.5 mg, 70%).

The product was obtained as a mixture of the title compound and its isomers (8.8:1) determined by <sup>1</sup>H NMR.

<sup>1</sup>H NMR (CDCl<sub>3</sub>, 399.78 MHz): δ 7.96–7.94 (m, 2H), 7.63–7.58 (m, 1H), 7.52–7.47 (m, 2H), 7.24–7.19 (m, 2H), 7.17–7.12 (m, 1H), 7.09–7.07 (m, 2H), 4.21 (q, *J* = 7.1 Hz, 2H), 2.70 (s, 4H), 1.32 (t, *J* = 7.1 Hz, 3H), 0.02 (s, 9H).

<sup>13</sup>C NMR (CDCl<sub>3</sub>, 100.53 MHz): δ 198.7, 171.1, 153.8, 140.8, 138.7, 135.8, 133.8, 129.6, 128.8, 128.4, 128.3, 126.0, 60.6, 36.4, 34.4, 14.4, -0.7.

IR (ATR): 3031 w, 2961 w, 2903 w, 1713 s, 1669s, 1597 w, 1579 w, 1496 w, 1449 m, 1315 w, 1250 s, 1212 s, 1174 w, 1036 m, 980 w, 842 s, 737 m, 699 s, 451 m, 436 m.

MS *m/z* (% relative intensity): 380 (M<sup>+</sup>, 3), 335 (11), 334 (28), 290 (11), 289 (48), 217 (14), 143 (16), 129 (15), 105 (62), 103 (29), 91 (65), 77 (36), 75 (43), 73 (100), 59 (10), 45 (14).

HRMS (DART<sup>+</sup>, [M+H]<sup>+</sup>): Calcd for C<sub>23</sub>H<sub>29</sub>O<sub>3</sub>Si 381.1881, Found 381.1800.

The regio- and stereochemistry of the major isomer was determined by NOESY spectroscopy.

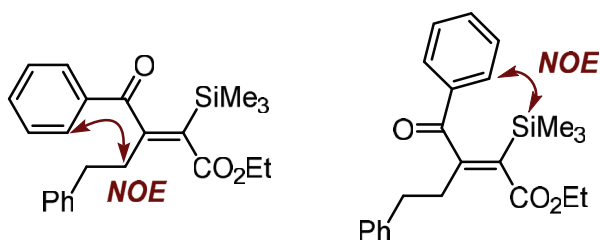

**Ethyl (Z)-3-cyclohexyl-4-oxo-4-phenyl-2-(trimethylsilyl)but-2-enoate (3ae).**

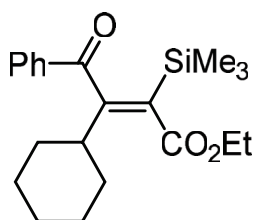

Method A was followed using **2e** (36.5 mg, 0.20 mmol) and **1a** (71.2 mg, 0.40 mmol).

$R_f$  0.43 (hexane/EtOAc = 10/1). Pale yellow oil (56.0 mg, 77%).

$^1\text{H}$  NMR ( $\text{CDCl}_3$ , 399.78 MHz):  $\delta$  8.00–7.97 (m, 2H), 7.58 (tt,  $J$  = 1.5, 7.3 Hz, 1H), 7.49–7.45 (m, 2H), 4.27 (q,  $J$  = 7.2 Hz, 2H), 2.52–2.45 (m, 1H), 1.83–1.80 (m, 2H), 1.67–1.61 (m, 2H), 1.56–1.54 (m, 1H), 1.35 (t,  $J$  = 7.2 Hz, 3H), 1.22–1.06 (m, 4H), 1.02–0.92 (m, 1H), -0.09 (s, 9H)

$^{13}\text{C}$  NMR ( $\text{CDCl}_3$ , 100.53 MHz):  $\delta$  198.4, 171.5, 157.6, 137.3, 134.7, 133.7, 130.2, 128.4, 60.4, 44.9, 31.8, 26.3, 25.5, 14.5, -0.7.

IR (ATR): 2930 s, 2853 m, 1714 s, 1669 s, 1595 s, 1542 w, 1521 w, 1449 s, 1317 s, 1251 m, 1215 s, 1036 w, 1010 w, 862 w, 843 s, 733 w, 693 w.

MS  $m/z$  (% relative intensity): 358 ( $\text{M}^+$ , 9), 312 (22), 297(16), 285 (12), 135 (21), 105 (70), 103 (16), 79 (10), 77 (35), 75 (34), 73 (100), 45 (13).

HRMS (DART+,  $[\text{M}+\text{H}]^+$ ): Calcd for  $\text{C}_{21}\text{H}_{31}\text{O}_3\text{Si}$  359.2037, Found 359.2034.

**Ethyl (Z)-3-methyl-4-oxo-4-phenyl-2-(trimethylsilyl)but-2-enoate (3af).**

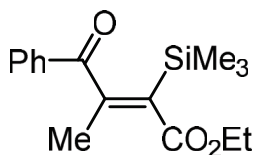

Method A was followed using **2f** (21.1 mg, 0.19 mmol) and **1a** (71.2 mg, 0.40 mmol).

$R_f$  0.34 (hexane/EtOAc = 10/1). Yellow oil (43.7 mg, 80%).

The product was obtained as a mixture of the title compound and its isomers (7.3:1) determined by  $^1\text{H}$  NMR.

$^1\text{H}$  NMR ( $\text{CDCl}_3$ , 399.78 MHz):  $\delta$  7.92–7.90 (m, 2H), 7.61–7.57 (m, 1H), 7.50–7.46 (m, 2H), 4.27 (q,  $J$  = 7.3 Hz, 2H), 2.04 (s, 3H), 1.34 (t,  $J$  = 7.3 Hz, 3H), 0.01 (s, 9H).

$^{13}\text{C}$  NMR ( $\text{CDCl}_3$ , 100.53 MHz):  $\delta$  199.0, 171.2, 150.5, 138.5, 135.2, 133.7, 129.6, 128.7, 60.6, 20.3, 14.4, -0.7.

IR (ATR): 2971 w, 2958 w, 1715 s, 1671 s, 1598 w, 1449 m, 1365 w, 1268 m, 1217 s, 1040 m, 948 m, 843 s, 726 m, 705 m, 631 w, 418 w.

MS m/z (% relative intensity): 290 ( $\text{M}^+$ , 2), 276 (17), 275 (73), 247 (11), 245 (14), 105 (66), 104 (11), 103 (100), 97 (24), 77 (49), 75 (70), 73 (65), 67 (44), 59 (13), 45 (14).

HRMS (DART+,  $[\text{M}+\text{H}]^+$ ): Calcd for  $\text{C}_{16}\text{H}_{23}\text{O}_3\text{Si}$  291.1411, Found 291.1415.

**Methyl (*Z*)-3-benzoyl-2-(trimethylsilyl)oct-2-enoate (**3ag**).**

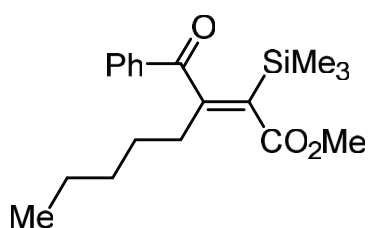

Method A was followed using **2g** (28.9 mg, 0.19 mmol) and **1a** (71.2 mg, 0.40 mmol).

$R_f$  0.37(hexane/EtOAc = 10/1). Pale yellow oil (39.7 mg, 64%).

The product was obtained as a mixture of the title compound and its isomers (8.3:1) determined by  $^1\text{H}$  NMR.

$^1\text{H}$  NMR ( $\text{CDCl}_3$ , 399.78 MHz):  $\delta$  7.92-7.89 (m, 2H), 7.60-7.56 (m, 1H), 7.50-7.44 (m, 2H), 3.79 (s, 3H), 2.40-2.36 (m, 2H), 1.37-1.30 (m, 2H), 1.22-1.12 (m, 4H), 0.80 (t,  $J$  = 6.9 Hz, 3H), -0.01 (s, 9H).

$^{13}\text{C}$  NMR ( $\text{CDCl}_3$ , 100.53 MHz):  $\delta$  198.7, 171.8, 155.3, 137.6, 135.9, 133.6, 129.6, 128.7, 51.4, 34.7, 31.4, 27.7, 22.1, 13.8, -0.7.

IR (ATR): 2953 m, 2931 w, 2872 w, 2155 w, 1717 s, 1671 s, 1597 w, 1580 w, 1449 m, 1433 w, 1315 w, 1250 m, 1219 s, 1176 w, 962 w, 844 s, 732 w, 692 w.

MS m/z (% relative intensity): 333 ( $\text{M}+\text{H}^+$ , 2), 317 (27), 301 (12), 300 (21), 285 (37), 275 (24), 258 (12), 233 (12), 123 (34), 105 (73), 89 (100), 77 (36), 75 (16), 73 (73), 67 (13), 59 (31), 45 (11).

HRMS (DART+,  $[\text{M}+\text{H}]^+$ ): Calcd for  $\text{C}_{19}\text{H}_{29}\text{O}_3\text{Si}$  333.1881, Found 333.1878.

**(1*R*,2*S*,5*R*)-2-Isopropyl-5-methylcyclohexyl (*Z*)-3-methyl-4-oxo-4-phenyl-2-(trimethylsilyl)but-2-enoate (**3ah**).**

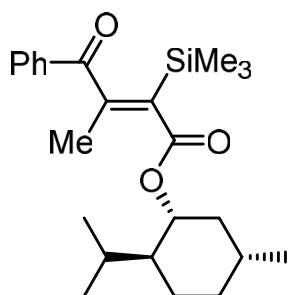

Method A was followed using **2h** (42.7 mg, 0.19 mmol) and **1a** (71.2 mg, 0.40 mmol).

$R_f$  0.43(hexane/EtOAc = 10/1). Yellow solid (63.0 mg, 82%). Mp 101.1–101.3 °C.

The product was obtained as a mixture of the title compound and its isomers (11:1) determined by  $^1\text{H}$  NMR.

$^1\text{H}$  NMR ( $\text{CDCl}_3$ , 399.78 MHz):  $\delta$  7.92–7.90 (m, 2H), 7.61–7.56 (m, 1H), 7.49 (t,  $J = 7.6$  Hz, 2H), 4.80 (dt,  $J = 4.3, 10.9$  Hz, 1H), 2.16–2.13 (m, 1H), 2.07–1.98 (m, 4H), 1.73–1.68 (m, 2H), 1.58–1.43 (m, 2H), 1.13–1.01 (m, 2H), 0.94–0.86 (m, 7H), 0.81–0.78 (m, 3H), 0.02 (s, 9H).

$^{13}\text{C}$  NMR ( $\text{CDCl}_3$ , 100.53 MHz):  $\delta$  199.1, 171.0, 149.5, 138.8, 135.3, 133.7, 129.6, 128.8, 75.1, 46.9, 41.0, 34.2, 31.5, 25.8, 22.9, 22.1, 20.8, 20.2, 15.8, -0.6

IR (ATR): 2954 m, 2930 w, 2870 w, 1709 s, 1672 s, 1597 w, 1580 w, 1456 m, 1449 m, 1371 w, 1223 s, 1022 w, 953 w, 845 s, 727 w, 706 w.

MS  $m/z$  (% relative intensity): 400 ( $\text{M}^+$ , 10), 262 (23), 261 (23), 247 (23), 245 (31), 219 (15), 218 (19), 217 (49), 138 (14), 105 (45), 97 (26), 95 (20), 83 (77), 81 (22), 77 (17), 75 (35), 73 (100), 69 (30), 67 (14), 57 (22), 55 (47), 43 (19), 41 (20).

HRMS (DART+,  $[\text{M}+\text{H}]^+$ ): Calcd for  $\text{C}_{24}\text{H}_{37}\text{O}_3\text{Si}$  401.2507, Found 401.2506.

**((2R,3R,4S,5R,6S)-3,4,5-Tris(benzyloxy)-6-methoxytetrahydro-2H-pyran-2-yl)methyl (Z)-3-methyl-4-oxo-4-phenyl-2-(trimethylsilyl)but-2-enoate (3ai).**

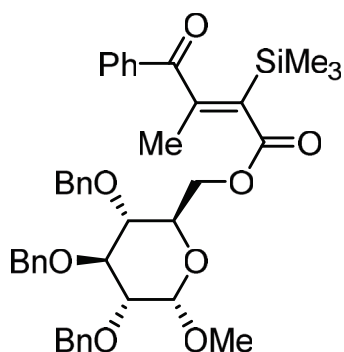

Method A was followed using **2i** (97.8 mg, 0.18 mmol) and **1a** (71.2 mg, 0.40 mmol).

$R_f$  0.46(hexane/EtOAc = 2/1). Pale yellow oil (85.7 mg, 66%).

The product was obtained as a mixture of the title compound and its isomers (30:1) determined by  $^1\text{H}$

NMR.

$^1\text{H}$  NMR ( $\text{CDCl}_3$ , 399.78 MHz):  $\delta$  7.91–7.89 (m, 2H), 7.60 (tt,  $J = 1.5, 7.3$  Hz, 1H), 7.51–7.47 (m, 2H), 7.38–7.27 (m, 15H), 5.01 (d,  $J = 11.0$  Hz, 1H), 4.94 (d,  $J = 10.5$  Hz, 1H), 4.82 (t,  $J = 11.7$  Hz, 2H), 4.67 (d,  $J = 11.9$  Hz, 1H), 4.62 (d,  $J = 11.0$  Hz, 1H), 4.56 (d,  $J = 3.2$  Hz, 1H), 4.53 (dd,  $J = 11.7, 2.1$  Hz, 1H), 4.27 (dd,  $J = 5.8$  Hz, 11.9 Hz, 1H), 4.05 (t,  $J = 9.2$  Hz, 1H), 3.93–3.88 (m, 1H), 3.53–3.46 (m, 2H), 3.40 (s, 3H), 2.02 (s, 3H), 0.01 (s, 9H).

$^{13}\text{C}$  NMR ( $\text{CDCl}_3$ , 100.53 MHz):  $\delta$  198.8, 171.0, 151.1, 138.5, 138.1, 137.9, 137.8, 135.2, 133.8, 129.6, 128.8, 128.5, 128.5, 128.4, 128.1, 128.0, 128.0, 127.9, 127.8, 127.7, 98.0, 81.8, 79.8, 78.1, 75.8, 75.2, 73.4, 68.8, 63.4, 55.3, 20.6, -0.7.

IR (ATR): 3030 w, 2948 w, 2908 w, 1716 s, 1671 s, 1648 w, 1540 w, 1455 m, 1362 w, 1211 s, 1089 s, 1046 s, 951 w, 844 s, 738 s, 697 s, 419 m.

HRMS (ESI+,  $[\text{M}+\text{Na}]^+$ ): Calcd for  $\text{C}_{42}\text{H}_{48}\text{O}_8\text{NaSi}$  731.3011, Found 731.3025.

**Ethyl 4-oxo-3,4-diphenyl-2-(trimethylsilyl)but-2-enoate (3aj).**

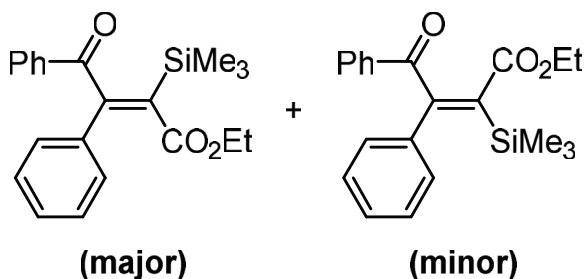

Method A was followed using **2j** (32.5 mg, 0.19 mmol) and **1a** (71.2 mg, 0.40 mmol), except that  $\text{Pd}_2(\text{dba})_3$  (0.0075 mmol) and IPr (0.015 mmol) were used.

$R_f$  0.29 (hexane/EtOAc = 10/1). Pale yellowish oil (47.1 mg, 72%).

The product was obtained as a mixture of stereoisomers (2.5:1) determined by  $^1\text{H}$  NMR.

$^1\text{H}$  NMR ( $\text{CDCl}_3$ , 399.78 MHz):  $\delta$  7.97–7.93 (m, 4H (2H (major) + 2H (minor))), 7.52–7.21 (m, 16H (8H (major) + 8H (minor))), 4.01 (q,  $J = 7.2$  Hz, 2H, major), 3.83 (q,  $J = 7.2$  Hz, 2H, minor), 1.02–0.96 (m, 6H (3H (major) + 3H (minor))), 0.08 (s, 9H, major), -0.02 (s, 9H, minor).

$^{13}\text{C}$  NMR ( $\text{CDCl}_3$ , 100.53 MHz):  $\delta$  196.7 (minor), 196.1 (major), 171.1 (major), 169.7 (minor), 158.0 (minor), 152.6 (major), 139.8 (major), 137.6 (minor), 136.9 (major), 136.4 (minor), 135.9 (major), 134.9 (minor), 133.7 (major), 133.3 (minor), 130.0 (major), 129.4 (minor), 128.60 (major), 128.55 (minor), 128.5 (minor), 128.4 (major), 128.3 (minor), 127.6 (major), 60.8 (minor), 60.6 (major), 13.9 (major), 13.6 (minor), -0.0 (minor), -0.7 (major).

IR (ATR): 3063 s, 2980 s, 2960 s, 2901 s, 1709 m, 1670 m, 1596 w, 1579 w, 1491 w, 1448 w, 1365 w, 1390 w, 1315 w, 1250 w, 1229 s, 1175 w, 1033 w, 871 w, 842 m, 633 w, 445 w.

MS  $m/z$  (% relative intensity): 352 ( $\text{M}^+$ , 8), 337 (29), 279 (16), 130 (10), 129 (100), 105 (37), 103 (13), 77 (21), 75 (18), 73 (46).

HRMS (DART+, [M+H]<sup>+</sup>): Calcd for C<sub>21</sub>H<sub>25</sub>O<sub>3</sub>Si 353.1568, Found 353.1572.

The regiochemistry of the major isomer of **3aj** was determined to be the compound with the silyl group incorporated into the carbon  $\alpha$  to the ester group by converting **3aj** into known desilylated product **3aj'**.<sup>10</sup>

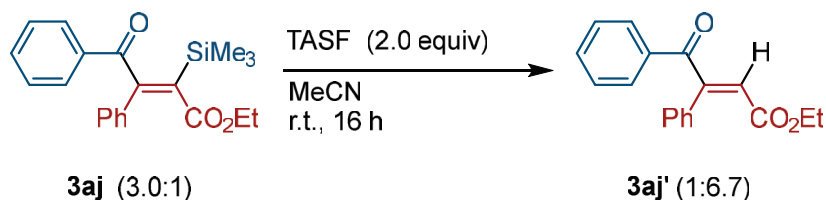

Deprotection of silylacetylated products was performed according to the literature.<sup>11</sup> A solution of TASF (40 mg, 0.144 mmol) in MeCN (4.5 mL) was added to a solution of **3aj** (25 mg, 0.072 mmol) in wet MeCN (1.5 mL). After stirring for 16 h, the mixture was filtered through a pad of silica, which was carefully rinsed with EtOAc, the combined filtrates were evaporated, and the residue purified by flash chromatography (hexane/EtOAc, 10/1) to afford **3aj'** (13.7 mg, 68%). The product was obtained as a mixture of *E/Z* isomers (1:6.7) determined by <sup>1</sup>H NMR.

<sup>1</sup>H NMR (CDCl<sub>3</sub>, 399.78 MHz):  $\delta$  7.98–7.91 (m, 4H (2H (*E*) + 2H (*Z*))), 7.57–7.33 (m, 16H (8H (*E*) + 8H (*Z*))), 6.51 (s, 1H, *Z*), 6.27 (s, 1H, *E*), 4.14–4.04 (m, 4H (2H (*E*) + 2H (*Z*))), 1.19–1.09 (m, 6H (3H (*E*) + 3H (*Z*))).

The stereochemistry of the major isomer **3aj** was determined to be *Z* configuration by NOESY spectroscopy.

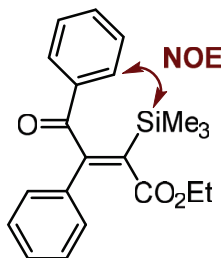

#### Ethyl 3-(4-methoxyphenyl)-4-oxo-4-phenyl-2-(trimethylsilyl)but-2-enoate (**3ak**).

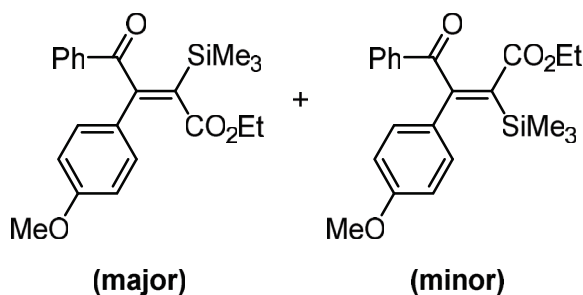

Method A was followed using **2k** (61.6 mg, 0.30 mmol) and **1a** (107.0 mg, 0.60 mmol).

R<sub>f</sub> 0.20 (hexane/EtOAc = 10/1). Yellow oil (84.3mg, 73%).

The product was obtained as a mixture of stereoisomers (1.9:1) determined by <sup>1</sup>H NMR.

<sup>1</sup>H NMR (CDCl<sub>3</sub>, 399.78 MHz): δ 7.96–7.92 (m, 4H (2H (major) + 2H (minor))), 7.53–7.48 (m, 2H (1H (major) + 1H (minor))), 7.44–7.32 (m, 8H (4H (major) + 4H (minor))), 6.87–6.83 (m, 2H, minor), 6.81–6.77 (m, 2H, major), 4.06 (q, *J* = 7.2 Hz, 2H, major), 3.84 (q, *J* = 7.2 Hz, 2H, minor), 3.78 (s, 3H, minor), 3.74 (s, 3H, major), 1.09 (t, *J* = 7.2 Hz, 3H, major), 0.98 (t, *J* = 7.2 Hz, 3H, minor), 0.08 (s, 9H, major), 0.03 (s, 9H, minor).

<sup>13</sup>C NMR (CDCl<sub>3</sub>, 100.53 MHz): δ 197.0 (minor), 196.3 (major), 171.4 (major), 169.8 (minor), 160.2 (minor), 159.8 (major), 158.1 (minor), 152.1 (major), 138.5 (major), 136.7 (minor), 135.9 (major), 135.0 (minor), 133.6 (major), 133.2 (minor), 130.03 (major), 129.95 (minor), 129.3 (major), 129.2 (minor), 129.0 (major), 128.63 (minor), 128.57 (major), 128.52 (minor), 113.9 (major), 113.7 (minor), 60.7 (minor), 60.6 (major), 55.2 (minor), 55.1 (major), 14.1 (major), 13.6 (minor), 0.1 (minor), -0.6 (major).

IR (ATR): 2956 w, 2838 w, 1707 s, 1668 s, 1605 m, 1508 s, 1449 m, 1297 w, 1250 s, 1229 s, 1176 m, 1069 w, 1031 m, 843 s, 693 m, 609 w.

MS *m/z* (% relative intensity): 382 (M<sup>+</sup>, 25), 367 (23), 310 (14), 309 (49), 159 (60), 105 (23), 77 (18), 75 (17), 73 (100), 45 (11).

HRMS (DART<sup>+</sup>, [M+H]<sup>+</sup>): Calcd for C<sub>22</sub>H<sub>27</sub>O<sub>4</sub>Si 383.1673, Found 383.1674.

#### Ethyl (*Z*)-3-(4-fluorophenyl)-4-oxo-4-phenyl-2-(trimethylsilyl)but-2-enoate (**3al**).

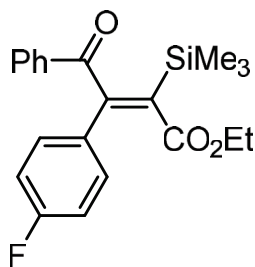

Method A was followed using **2l** (38.4mg, 0.20 mmol) and **1a** (71.2 mg, 0.40 mmol), except that Pd<sub>2</sub>(dba)<sub>3</sub> (0.005 mmol) and IPr (0.010 mmol) were used.

R<sub>f</sub> 0.14 (hexane/EtOAc = 10/1). Yellowish oil (45.2 mg, 61%).

The product was obtained as a mixture of the title compound and its isomers (14:1) determined by <sup>1</sup>H NMR.

<sup>1</sup>H NMR (CDCl<sub>3</sub>, 399.78 MHz): δ 7.96–7.92 (m, 2H), 7.55–7.52 (m, 1H), 7.47–7.38 (m, 4H), 6.99–6.94 (m, 2H), 4.04 (q, *J* = 7.1 Hz, 2H), 1.06 (t, *J* = 7.1 Hz, 3H), 0.07 (s, 9H).

<sup>13</sup>C NMR (CDCl<sub>3</sub>, 100.53 MHz): δ 196.1, 171.0, 162.7 (d, *J* = 248.2 Hz), 151.2, 140.3, 135.7, 133.8, 132.9 (d, *J* = 2.9 Hz), 130.0, 129.5 (d, *J* = 8.6 Hz), 128.7, 115.5 (d, *J* = 21.1 Hz), 60.7, 14.0, -0.7.

<sup>19</sup>F NMR (CDCl<sub>3</sub>, 376.17 MHz): δ -114.0.



IR (ATR): 2976 w, 1961 w, 1707 s, 1668 s, 1597 m, 1505 s, 1449 w, 1228 s, 1161 w, 1001 w, 840 s, 734 w, 613 w, 523 w, 461 w.

MS m/z (% relative intensity): 370 ( $M^+$ , 11), 356 (12), 355 (45), 297 (22), 177 (11), 147 (100), 105 (57), 103 (23), 77 (31), 75 (24), 73 (71), 45 (11).

HRMS (DART+,  $[M+H]^+$ ): Calcd for  $C_{21}H_{24}O_3FSi$  371.1473, Found 371.1476.

**Ethyl 4-oxo-4-phenyl-3-(thiophen-2-yl)-2-(trimethylsilyl)but-2-enoate (3am).**

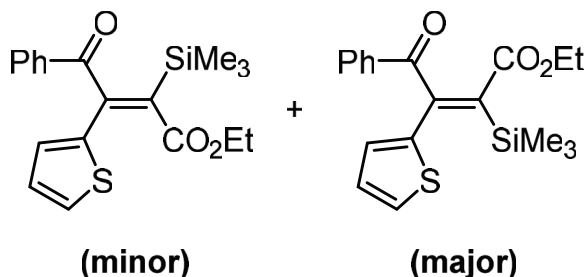

Method A was followed using **2m** (38.1 mg, 0.21 mmol) and **1a** (71.2 mg, 0.40 mmol), except that  $Pd_2(dba)_3$  (0.0075 mmol) and IPr (0.015 mmol) were used.

$R_f$  0.20 (hexane/EtOAc = 10/1). Yellow oil (40.3 mg, 53%).

The product was obtained as a mixture of stereoisomers (0.4:1) determined by  $^1H$  NMR.

$^1H$  NMR ( $CDCl_3$ , 399.78 MHz):  $\delta$  8.00–7.98 (m, 2H, major), 7.95–7.93 (m, 2H, minor), 7.57–7.52 (m, 3H, minor), 7.47–7.42 (m, 3H, major), 7.35 (dd,  $J = 5.0, 1.4$  Hz, 1H, minor), 7.28 (dd,  $J = 5.0, 1.4$  Hz, 1H, major), 7.15–7.14 (m, 1H, minor), 7.00–6.98 (m, 2H (1H(major) + 1H(minor))), 6.90 (dd,  $J = 5.0, 3.7$  Hz, 1H, major), 4.23 (q,  $J = 7.2$  Hz, 2H, major), 3.81 (q,  $J = 7.2$  Hz, 2H, minor), 1.26 (t,  $J = 7.2$  Hz, 3H, major), 0.98 (t,  $J = 7.2$  Hz, 3H, minor), 0.12 (s, 9H, minor), 0.06 (s, 9H, major).

$^{13}C$  NMR ( $CDCl_3$ , 100.53 MHz):  $\delta$  196.0 (minor), 195.3 (major), 171.2 (major), 169.6 (minor), 150.4 (minor), 144.3 (major), 139.4 (minor), 138.1 (major), 137.7 (major), 137.0 (minor), 135.9 (major), 134.7 (minor), 133.9 (major), 133.6 (minor), 130.1 (major), 129.4 (minor), 128.8 (minor), 128.7 (major), 128.62 (major), 128.59 (minor), 128.4 (minor), 127.8 (major), 127.2 (major), 127.1 (minor), 61.1 (major), 60.9 (minor), 14.1 (major), 13.6 (minor), -0.2 (minor), -0.7 (major).

IR (ATR): 2977 w, 2957 w, 1708 s, 1671 s, 1595 m, 1578 m, 1508 w, 1449 m, 1388 w, 1315 w, 1250 m, 1233 s, 1223 s, 1177 w, 1036 m, 984 w, 843 s, 744 w, 700 w, 633 m.

MS m/z (% relative intensity): 358 (22), 343 (25), 286 (14), 285 (49), 135 (100), 105 (59), 103 (13), 77 (38), 75 (26), 73 (90), 45 (16).

HRMS (DART+,  $[M+H]^+$ ): Calcd for  $C_{19}H_{23}O_3SiS$  359.1132, Found 359.1139.

**(Z)-5,5-Dimethyl-2-phenethyl-1-phenyl-3-(trimethylsilyl)hex-2-ene-1,4-dione (3an).**

**(E)-5,5-Dimethyl-2-phenethyl-1-phenylhex-2-ene-1,4-dione (3an').**

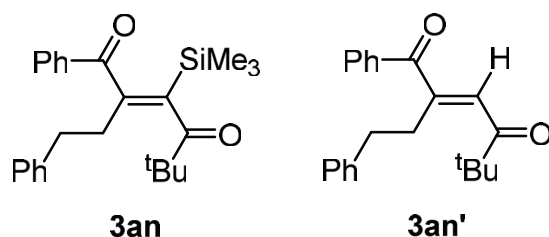

Method A was followed using **2n** (45.0 mg, 0.21 mmol) and **1a** (71.2 mg, 0.40 mmol), except that Pd<sub>2</sub>(dba)<sub>3</sub> (0.0075 mmol) and IPr (0.015 mmol) was used.

Silylacylation product **3an** and its desilylated product **3an'** were obtained and could be separated by column chromatography.

### **3an**

R<sub>f</sub> 0.46(hexane/EtOAc = 10/1). Pale yellow oil (16.7 mg, 20%).

The product was obtained as a mixture of the title compound and its isomers (12:1) determined by <sup>1</sup>H NMR.

<sup>1</sup>H NMR (CDCl<sub>3</sub>, 399.78 MHz): δ 8.02–8.00 (m, 2H), 7.58–7.54 (m, 1H), 7.49–7.44 (m, 2H), 7.30 (t, *J* = 7.3 Hz, 2H), 7.23–7.19 (m, 3H), 2.82–2.78 (m, 2H), 2.39–2.35 (m, 2H), 1.06 (s, 9H), 0.14 (s, 9H).

<sup>13</sup>C NMR (CDCl<sub>3</sub>, 100.53 MHz): δ 213.0, 195.7, 154.7, 150.3, 141.8, 137.2, 133.6, 130.2, 128.6, 128.5, 128.2, 126.1, 45.6, 37.7, 36.8, 26.9, 0.1.

IR (ATR): 3062 w, 2962 m, 2870 w, 2155 w, 1685 s, 1657 s, 1598 m, 1496 w, 1449 m, 1317 w, 1243 s, 1177 w, 1082 m, 964 m, 887 w, 842 s, 698 s, 555 w, 478 w, 404 w.

MS *m/z* (% relative intensity): 392 (M<sup>+</sup>, 0.2), 335 (24), 287 (25), 218 (23), 217 (12), 155 (11), 105 (16), 91 (19), 77 (14), 75 (14), 73 (100), 57 (48), 45 (11).

HRMS (DART<sup>+</sup>, [M+H]<sup>+</sup>): Calcd for C<sub>25</sub>H<sub>33</sub>O<sub>2</sub>Si 393.2244, Found 393.2247.

### **3an'**

R<sub>f</sub> 0.20 (hexane/EtOAc = 10/1). Pale yellow oil (51.1 mg, 76%).

The product was obtained as a mixture of the title compound and its isomers (53:1) determined by <sup>1</sup>H NMR.

<sup>1</sup>H NMR (CDCl<sub>3</sub>, 399.78 MHz): δ 7.85–7.83 (m, 2H), 7.57–7.53 (m, 1H), 7.46–7.42 (m, 2H), 7.31–7.27 (m, 2H), 7.22–7.18 (m, 3H), 6.51 (s, 1H), 2.90–2.87 (m, 2H), 2.73–2.69 (m, 2H), 1.07 (s, 9H).

<sup>13</sup>C NMR (CDCl<sub>3</sub>, 100.53 MHz): δ 203.0, 199.2, 157.1, 140.1, 134.8, 133.2, 128.6, 128.49, 128.46, 128.29, 126.3, 122.3, 42.9, 36.6, 33.2, 25.9.

IR (ATR): 2966 w, 2930 w, 1700 s, 1684 s, 1610 s, 1497 w, 1449 s, 1367 m, 1232 s, 1131 w, 1084 m, 1001 w, 888 w, 752 w, 700 s, 492 w.

MS *m/z* (% relative intensity): 320 (M<sup>+</sup>, 20), 264 (44), 263 (16), 235 (12), 173 (49), 145 (19), 117

(12), 105 (86), 91 (100), 77 (39), 57 (64), 41 (15).

HRMS (DART+, [M+H]<sup>+</sup>): Calcd for C<sub>22</sub>H<sub>25</sub>O<sub>2</sub> 321.1849, Found 321.1857.

**Ethyl (Z)-3-(4-methoxybenzoyl)-2-(trimethylsilyl)oct-2-enoate (3ba).**

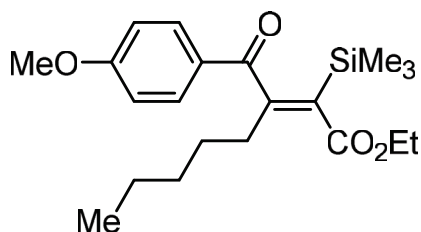

Method A was followed using **2a** (34.6 mg, 0.21 mmol) and **1b** (83.3 mg, 0.40 mmol).

R<sub>f</sub> 0.40 (hexane/EtOAc = 10/1). Yellow oil (62.2 mg, 80%).

The product was obtained as a mixture of the title compound and its isomers (3.7:1) determined by <sup>1</sup>H NMR.

<sup>1</sup>H NMR (CDCl<sub>3</sub>, 399.78 MHz): δ 7.91–7.89 (m, 2H), 6.96–6.95 (m, 2H), 4.25 (q, *J* = 7.2 Hz, 2H), 3.88 (s, 3H), 2.40–2.36 (m, 2H), 1.38–1.32 (m, 5H), 1.21–1.18 (m, 4H), 0.82–0.77 (m, 3H), -0.02 (s, 9H).

<sup>13</sup>C NMR (CDCl<sub>3</sub>, 100.53 MHz): δ 197.4, 171.4, 163.9, 155.2, 136.7, 132.0, 129.1, 113.9, 60.4, 55.5, 34.9, 31.6, 27.8, 22.2, 14.4, 13.9, -0.7.

IR (ATR): 2953 m, 2933 m, 1715 s, 1663 m, 1599 s, 1542 w, 1508 m, 1419 w, 1254 s, 1169 m, 1034 m, 847 s.

MS *m/z* (% relative intensity): 376 (M<sup>+</sup>, 7), 361 (27), 331 (11), 330 (14), 319 (23), 315 (16), 135 (100), 123 (13), 103 (20), 77 (13), 75 (21), 73 (46).

HRMS (DART+, [M+H]<sup>+</sup>): Calcd for C<sub>21</sub>H<sub>33</sub>O<sub>4</sub>Si 377.2143, Found 377.2144.

**Methyl (Z)-4-(2-(2-ethoxy-2-oxo-1-(trimethylsilyl)ethylidene)heptanoyl)benzoate (3ca).**

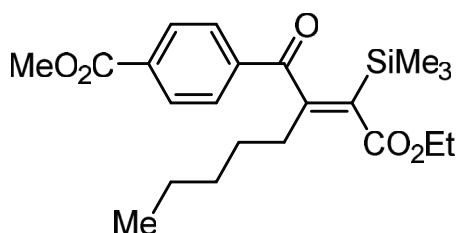

Method A was followed using **2a** (34.5 mg, 0.21 mmol) and **1c** (94.6 mg, 0.40 mmol).

R<sub>f</sub> 0.29 (hexane/EtOAc = 10/1). Pale yellow oil (61.0 mg, 73%).

The product was obtained as a mixture of the title compound and its isomers (10:1) determined by <sup>1</sup>H NMR.

<sup>1</sup>H NMR (CDCl<sub>3</sub>, 399.78 MHz): δ 8.14 (d, *J* = 8.8 Hz, 2H), 7.97 (d, *J* = 8.8 Hz, 2H), 4.27 (q, *J* = 7.2 Hz, 2H), 3.95 (s, 3H), 2.38 (t, *J* = 8.0 Hz, 2H), 1.37–1.30 (m, 5H), 1.20–1.16 (m, 4H), 0.80 (t, *J* = 7.2

Hz, 3H), 0.00 (s, 9H).

$^{13}\text{C}$  NMR ( $\text{CDCl}_3$ , 100.53 MHz):  $\delta$  198.3, 171.1, 166.1, 154.2, 139.2, 138.8, 134.4, 129.9, 129.4, 60.6, 52.5, 34.3, 31.4, 27.7, 22.2, 14.4, 13.8, -0.7.

IR (ATR): 2954 m, 2933 w, 2871 w, 1723 s, 1672 w, 1558 w, 1521 w, 1472 w, 1437 w, 1406 w, 1279 s, 1250 m, 1219 m, 1107 m, 845 m, 745 m.

MS  $m/z$  (% relative intensity): 404 ( $\text{M}^+$ , 9), 389 (11), 347 (30), 343 (22), 299 (19), 275 (13), 262 (33), 227 (19), 201 (11), 189 (20), 188 (12), 163 (43), 135 (17), 123 (39), 115 (12), 104 (14), 103 (38), 77 (11), 75 (41), 73 (100), 69 (10), 67 (14), 59 (20), 55 (18), 45 (15), 44 (20), 43 (17), 41 (17).

HRMS (DART+,  $[\text{M}+\text{H}]^+$ ): Calcd for  $\text{C}_{22}\text{H}_{33}\text{O}_5\text{Si}$  405.2092, Found 405.2085.

**Ethyl (Z)-3-(4-fluorobenzoyl)-2-(trimethylsilyl)oct-2-enoate (3da).**

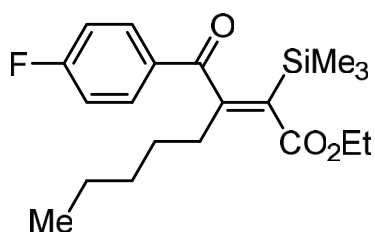

Method A was followed using **2a** (36.7 mg, 0.22 mmol) and **1d** (78.4 mg, 0.40 mmol).

$R_f$  0.50 (hexane/EtOAc = 10/1). Yellow oil (65.5 mg, 82%).

The product was obtained as a mixture of the title compound and its isomers (7.4:1) determined by  $^1\text{H}$  NMR.

$^1\text{H}$  NMR ( $\text{CDCl}_3$ , 399.78 MHz):  $\delta$  7.98–7.92 (m, 2H), 7.18–7.13 (m, 2H), 4.26 (q,  $J = 7.2$  Hz, 2H), 2.39–2.35 (m, 2H), 1.36–1.29 (m, 5H), 1.27–1.12 (m, 4H), 0.82–0.77 (m, 3H), -0.01 (s, 9H).

$^{13}\text{C}$  NMR ( $\text{CDCl}_3$ , 100.53 MHz):  $\delta$  197.2, 171.2, 166.0 (d,  $J = 255.9$  Hz), 154.4, 137.8, 132.2 (d,  $J = 8.6$  Hz), 131.6 (d,  $J = 9.6$  Hz), 115.9 (d,  $J = 22.0$  Hz), 60.6, 34.6, 31.5, 27.8, 22.2, 14.4, 13.8, -0.7.

$^{19}\text{F}$  NMR ( $\text{CDCl}_3$ , 376.17 MHz):  $\delta$  -105.1.

IR (ATR): 2957 m, 2932 m, 2861 w, 1715 s, 1671 s, 1597 s, 1506 m, 1449 w, 1365 w, 1249 w, 1227 s, 1152 m, 1037 w, 957 w, 844 s, 692w.

MS  $m/z$  (% relative intensity): 364 ( $\text{M}^+$ , 4), 349 (20), 321 (13), 319 (17), 318 (22), 307 (14), 304 (10), 303 (42), 276 (15), 235 (10), 123 (100), 103 (66), 95 (27), 75 (52), 73 (78), 67 (11), 59 (13).

HRMS (DART+,  $[\text{M}+\text{H}]^+$ ): Calcd for  $\text{C}_{20}\text{H}_{30}\text{O}_3\text{FSi}$  365.1943, Found 365.1946.

**Ethyl (Z)-3-(4-cyanobenzoyl)-2-(trimethylsilyl)oct-2-enoate (3ea).**

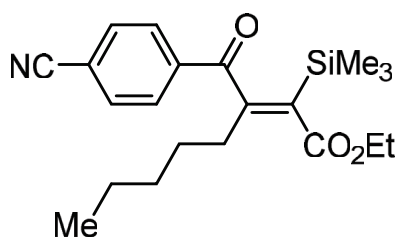

Method A was followed using **2a** (36.4 mg, 0.22 mmol) and **1e** (81.3 mg, 0.40 mmol).

$R_f$  0.29 (hexane/EtOAc = 10/1). Yellow oil (44.4 mg, 56%).

The product was obtained as a mixture of the title compound and its isomers (22:1) determined by  $^1\text{H}$  NMR.

$^1\text{H}$  NMR ( $\text{CDCl}_3$ , 399.78 MHz):  $\delta$  8.01 (d,  $J = 8.7$  Hz, 2H), 7.79 (d,  $J = 8.7$  Hz, 2H), 4.27 (q,  $J = 7.2$  Hz, 2H), 2.38–2.34 (m, 2H), 1.37–1.27 (m, 5H), 1.22–1.16 (m, 4H), 0.80 (t,  $J = 6.9$  Hz, 3H), 0.00 (s, 9H).

$^{13}\text{C}$  NMR ( $\text{CDCl}_3$ , 100.53 MHz):  $\delta$  197.4, 170.9, 153.4, 139.8, 138.9, 132.6, 129.8, 117.8, 116.8, 60.7, 34.1, 31.3, 27.7, 22.1, 14.4, 13.8, -0.7.

IR (ATR): 2957 m, 2933 m, 2232 w, 1715 s, 1679 s, 1604 w, 1465 w, 1405 w, 1251 s, 1220 s, 1037 w, 955 w, 846 s, 418 m.

MS  $m/z$  (% relative intensity): 371 ( $\text{M}^+$ , 5), 356 (11), 314 (14), 310 (20), 242 (13), 130 (30), 123 (36), 103 (58), 102 (20), 75 (61), 73 (100), 67 (13), 59 (13), 45 (13).

HRMS (DART+,  $[\text{M}+\text{H}]^+$ ): Calcd for  $\text{C}_{21}\text{H}_{30}\text{NO}_3\text{Si}$  372.1990, Found 372.1982.

**Ethyl (Z)-3-(3,5-dimethylbenzoyl)-2-(trimethylsilyl)oct-2-enoate (3fa).**

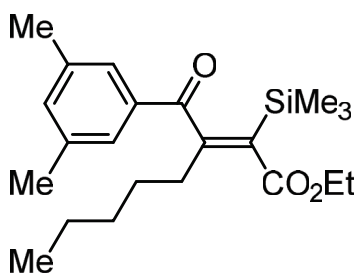

Method A was followed using **2a** (32.7 mg, 0.19 mmol) and **1f** (82.5 mg, 0.40 mmol).

$R_f$  0.40 (hexane/EtOAc = 10/1). Colorless oil (55.5 mg, 76%).

The product was obtained as a mixture of the title compound and its isomers (7.0:1) determined by  $^1\text{H}$  NMR.

$^1\text{H}$  NMR ( $\text{CDCl}_3$ , 399.78 MHz):  $\delta$  7.52 (s, 2H), 7.21 (s, 1H), 4.26 (q,  $J = 7.1$  Hz, 2H), 2.40–2.34 (m, 8H), 1.36–1.30 (m, 5H), 1.21–1.17 (m, 4H), 0.81 (t,  $J = 7.1$  Hz, 3H), 0.00 (s, 9H).

$^{13}\text{C}$  NMR ( $\text{CDCl}_3$ , 100.53 MHz):  $\delta$  199.2, 171.5, 155.3, 138.3, 137.4, 136.0, 135.4, 127.3, 60.5, 34.7, 31.5, 27.8, 22.2, 21.2, 14.4, 13.9, -0.6.

IR (ATR): 2956 m, 2929 m, 1715 s, 1670 s, 1605 w, 1508 w, 1457 w, 1379 w, 1305 m, 1210 s, 1092

w, 966 w, 845 s, 694 w.

MS m/z (% relative intensity): 374 ( $M^+$ , 13), 359 (20), 329 (21), 328 (30), 318 (14), 317 (45), 314 (13), 313 (45), 301 (15), 245 (20), 134 (10), 133 (100), 123 (37), 105 (42), 103 (50), 79 (15), 77 (12), 75 (46), 73 (86), 67 (11), 59 (13).

HRMS (DART+,  $[M+H]^+$ ): Calcd for  $C_{22}H_{35}O_3Si$  375.2350, Found 375.2350.

**Ethyl (Z)-3-(2-naphthoyl)-2-(trimethylsilyl)oct-2-enoate (3ga).**

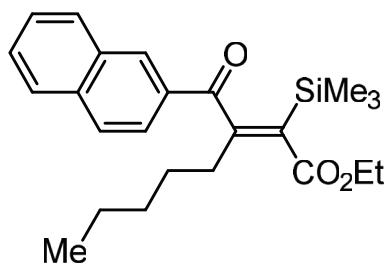

Method A was followed using **2a** (34.4 mg, 0.20 mmol) and **1g** (91.3 mg, 0.40 mmol).

$R_f$  0.34 (hexane/EtOAc = 10/1). Pale yellow oil (60.1 mg, 74%).

The product was obtained as a mixture of the title compound and its isomers (9.4:1) determined by  $^1H$  NMR.

$^1H$  NMR ( $CDCl_3$ , 399.78 MHz):  $\delta$  8.43 (s, 1H), 8.03–8.00 (m, 2H), 7.94–7.89 (m, 2H), 7.65–7.55 (m, 2H), 4.30 (q,  $J = 7.0$  Hz, 2H), 2.50–2.46 (m, 2H), 1.42–1.36 (m, 5H), 1.23–1.18 (m, 4H), 0.82–0.79 (m, 3H), 0.01 (s, 9H).

$^{13}C$  NMR ( $CDCl_3$ , 100.53 MHz):  $\delta$  198.8, 171.4, 155.0, 137.8, 135.9, 133.3, 132.4, 132.1, 129.8, 128.8, 128.7, 127.9, 126.9, 124.4, 60.6, 34.8, 31.5, 27.8, 22.2, 14.4, 13.9, -0.6.

IR (ATR): 2955 m, 2929 m, 2870 w, 2860 w, 1714 s, 1667 m, 1626 w, 1508 w, 1458 w, 1387 w, 1353 w, 1248 m, 1218 s, 1185 m, 1122 w, 1037 w, 844 s, 781 w, 452 m.

MS m/z (% relative intensity): 396 ( $M^+$ , 15), 381 (11), 340 (16), 339 (53), 293 (11), 267 (13), 207 (11), 193 (11), 155 (26), 127 (29), 123 (12), 103 (17), 75 (24), 73 (100), 45 (11).

HRMS (DART+,  $[M+H]^+$ ): Calcd for  $C_{24}H_{33}O_3Si$  397.2194, Found 397.2199.

**Ethyl (Z)-3-benzoyl-2-(dimethyl(phenyl)silyl)oct-2-enoate (3ha).**

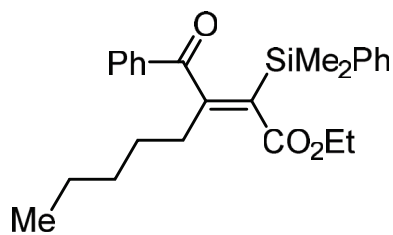

Method A was followed using **2a** (32.4 mg, 0.19 mmol) and **1h** (96.2 mg, 0.40 mmol).

$R_f$  0.43 (hexane/EtOAc = 10/1). Light brown oil (72.9 mg, 92%).

The product was obtained as a mixture of the title compound and its isomers (5.7:1) determined by <sup>1</sup>H NMR.

<sup>1</sup>H NMR (CDCl<sub>3</sub>, 399.78 MHz): δ 7.75–7.72 (m, 2H), 7.52–7.47 (m, 1H), 7.38–7.33 (m, 4H), 7.21–7.13 (m, 3H), 4.10 (q, *J* = 7.3 Hz, 2H), 2.44–2.40 (m, 2H), 1.38–1.30 (m, 2H), 1.25–1.17 (m, 7H), 0.82–0.78 (m, 3H), 0.31 (s, 6H).

<sup>13</sup>C NMR (CDCl<sub>3</sub>, 100.53 MHz): δ 198.3, 171.0, 156.7, 136.4, 136.0, 135.5, 134.2, 133.3, 129.5, 129.1, 128.3, 127.3, 60.5, 34.7, 31.5, 27.8, 22.2, 14.2, 13.9, -1.9.

IR (ATR): 3068 w, 2956 m, 2931 m, 1713 s, 1670 s, 1597 w, 1449 w, 1315 w, 1218 s, 1112 w, 1038 w, 986 w, 838 m, 729m, 701 m, 654 w, 481 w.

MS *m/z* (% relative intensity): 408 (M<sup>+</sup>, 18), 394 (10), 393 (33), 351 (1), 331 (25), 305 (17), 203 (19), 165 (10), 137 (26), 136 (14), 135 (100), 123 (19), 121 (20), 107 (13), 105 (61), 103 (16), 91 (11), 77 (31), 75 (28), 43 (14).

HRMS (DART<sup>+</sup>, [M+H]<sup>+</sup>): Calcd for C<sub>25</sub>H<sub>33</sub>O<sub>3</sub>Si 409.2194, Found 409.2190.

## VI-2. Indanone Products

The relative stereochemistries of the following indanone derivatives were determined to be *trans* based on the coupling constants of the ring methine protons (*trans*: ~5 Hz; *cis*: ~8 Hz).<sup>12</sup>

### Methyl *trans*-3-oxo-2-pentyl-2,3-dihydro-1*H*-indene-1-carboxylate (**4ag**).

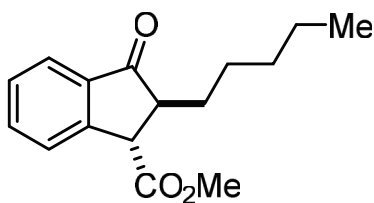

Method B was followed using **1a** (35.6 mg, 0.20 mmol) and **2g** (37.0mg, 0.24 mmol).

R<sub>f</sub> 0.29 (hexane/EtOAc = 10/1). Yellow oil (44.0 mg, 85%).

<sup>1</sup>H NMR (CDCl<sub>3</sub>, 399.78 MHz): δ 7.77 (d, *J* = 7.8 Hz, 1H), 7.66–7.61 (m, 2H), 7.48–7.43 (m, 1H), 3.96 (d, *J* = 4.1 Hz, 1H), 3.80 (s, 3H), 3.14–3.10 (m, 1H), 2.01–1.92 (m, 1H), 1.61–1.52 (m, 2H), 1.43–1.27 (m, 5H), 0.90–0.86 (m, 3H).

<sup>13</sup>C NMR (CDCl<sub>3</sub>, 100.53 MHz): δ 206.3, 172.6, 150.0, 136.1, 135.0, 128.8, 126.1, 124.1, 52.6, 51.1, 50.4, 31.7, 30.7, 26.7, 22.4, 14.0.

IR (ATR): 2953 m, 2931 m, 2936 w, 1739 s, 1717 s, 1670 w, 1647 w, 1541 w, 1507 w, 1457 w, 1418 w, 1364 w, 1216 m, 1168 w, 758 w, 458 w, 419 w.

MS *m/z* (% relative intensity): 260 (M<sup>+</sup>, 4), 203 (12), 191 (10), 190 (86), 158 (24), 131 (63), 130 (100), 129 (12), 128 (10), 116 (12), 115 (31), 103 (10), 91 (11), 41 (13).

HRMS (DART+, [M+H]<sup>+</sup>): Calcd for C<sub>16</sub>H<sub>21</sub>O<sub>3</sub> 261.1485, Found 261.1485.

**Ethyl *trans*-3-oxo-2-phenyl-2,3-dihydro-1*H*-indene-1-carboxylate (4aj).** [CAS: 79379-67-2]

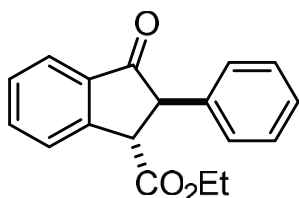

Method B was followed using **1a** (36.7 mg, 0.21 mmol) and **2j** (41.8mg, 0.24 mmol).

R<sub>f</sub> 0.14 (hexane/EtOAc = 10/1). Yellow oil (50.4 mg, 87%).

<sup>1</sup>H NMR (CDCl<sub>3</sub>, 399.78 MHz): δ 7.85 (d, *J* = 7.8 Hz, 1H), 7.77–7.68 (m, 2H), 7.52 (t, *J* = 7.6 Hz, 1H), 7.36–7.27 (m, 3H), 7.20–7.17 (m, 2H), 4.40 (d, *J* = 4.6 Hz, 1H), 4.35 (d, *J* = 4.6 Hz, 1H), 4.32–4.23 (m, 2H), 1.33 (t, *J* = 7.1 Hz, 3H).

<sup>13</sup>C NMR (CDCl<sub>3</sub>, 100.53 MHz): δ 203.8, 171.3, 149.9, 138.2, 135.6, 135.3, 129.1, 128.9, 128.2, 127.4, 126.0, 124.6, 61.8, 56.5, 53.4, 14.2.

IR (ATR): 3062 w, 2981 w, 2936 w, 2871 w, 1719 s, 1671 w, 1601 m, 1464 w, 1393 w, 1317 w, 1216 s, 1192 s, 1178 s, 1034 m, 1015 m, 848 m, 760 m, 699 s, 447 w.

MS *m/z* (% relative intensity): 281 (M+H<sup>+</sup>, 21), 280 (M<sup>+</sup>, 100), 253 (11), 252 (61), 208 (21), 207 (92), 206 (81), 205 (17), 180 (10), 179 (68), 178 (99), 177 (19), 176 (21), 152 (21), 151 (11), 133 (12), 89 (31), 88 (12), 77 (12), 76 (24).

HRMS (DART+, [M+H]<sup>+</sup>): Calcd for C<sub>18</sub>H<sub>17</sub>O<sub>3</sub> 281.1172, Found 281.1175.

**Ethyl *trans*-2-(4-methoxyphenyl)-3-oxo-2,3-dihydro-1*H*-indene-1-carboxylate (4ak).**

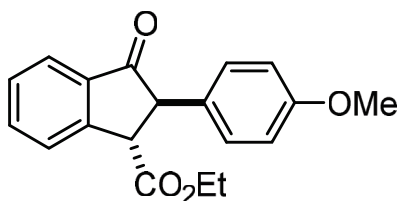

Method B was followed using **1a** (44.4 mg, 0.25 mmol) and **2k** (56.1mg, 0.29 mmol).

R<sub>f</sub> 0.11 (hexane/EtOAc = 10/1). Red oil (46.7 mg, 61%).

<sup>1</sup>H NMR (CDCl<sub>3</sub>, 399.78 MHz): δ 7.84 (d, *J* = 7.3 Hz, 1H), 7.75–7.67 (m, 2H), 7.53–7.49 (m, 1H), 7.11 (dt, *J* = 9.3, 2.5 Hz, 2H), 6.87 (dt, *J* = 9.3, 2.5 Hz, 2H), 4.34 (d, *J* = 4.6 Hz, 1H), 4.32–4.22 (m, 3H), 3.79 (s, 3H), 1.33 (t, *J* = 7.1 Hz, 3H).

<sup>13</sup>C NMR (CDCl<sub>3</sub>, 100.53 MHz): δ 204.1, 171.3, 158.9, 149.8, 135.5, 135.3, 130.2, 129.3, 129.0, 126.0, 124.6, 114.4, 61.8, 55.9, 55.3, 53.5, 14.3.



IR (ATR): 2970 m, 2936 m, 1719 s, 1647 w, 1609 m, 1514 s, 1463 m, 1368 m, 1318 w, 1288 w, 1251 s, 1229 m, 1179 m, 1035 m, 1016 w, 830 w, 759 m, 527 w, 419 w.

MS m/z (% relative intensity): 311 (M+H<sup>+</sup>, 16), 310 (M<sup>+</sup>, 69), 282 (41), 238 (13), 237 (65), 236 (100), 235 (11), 209 (12), 194 (15), 166 (13), 165 (43), 108 (17).

HRMS (DART+, [M+H]<sup>+</sup>): Calcd for C<sub>19</sub>H<sub>19</sub>O<sub>4</sub> 311.1278, Found 311.1277.

**Ethyl *trans*-2-(4-fluorophenyl)-3-oxo-2,3-dihydro-1*H*-indene-1-carboxylate (4al).**

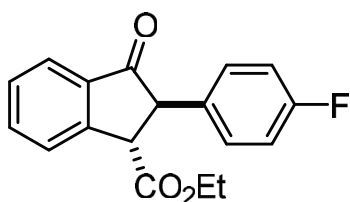

Method B was followed using **1a** (36.4 mg, 0.20 mmol) and **2l** (46.1 mg, 0.24 mmol).

R<sub>f</sub> 0.14 (hexane/EtOAc = 10/1). Pale yellowish oil (51.7 mg, 85%).

<sup>1</sup>H NMR (CDCl<sub>3</sub>, 399.78 MHz): δ 7.84 (d, *J* = 7.8 Hz, 1H), 7.77–7.69 (m, 2H), 7.52 (t, *J* = 7.3 Hz, 1H), 7.19–7.14 (m, 2H), 7.02 (tt, *J* = 8.9, 2.4 Hz, 2H), 4.38 (d, *J* = 5.0 Hz, 1H), 4.33–4.23 (m, 3H), 1.34 (t, *J* = 7.1 Hz, 3H).

<sup>13</sup>C NMR (CDCl<sub>3</sub>, 100.53 MHz): δ 203.5, 171.1, 162.1 (d, *J* = 245.3 Hz), 149.6, 135.5, 135.4, 133.8 (d, *J* = 3.8 Hz), 129.9 (d, *J* = 8.6 Hz), 129.2, 126.0, 124.6, 115.8 (d, *J* = 22.0 Hz), 61.9, 55.7, 53.4, 14.2.

<sup>19</sup>F NMR (CDCl<sub>3</sub>, 376.17 MHz): δ -116.3.

IR (ATR): 2982 w, 2908 w, 1718 s, 1604 m, 1509 s, 1463 m, 1369 w, 1319 w, 1287 w, 1226 s, 1161 m, 1097 m, 1034 m, 1014 m, 833 w, 758 s, 550 w, 518 w, 433 w, 407 w.

MS m/z (% relative intensity): 299 (M+H<sup>+</sup>, 20), 298 (M<sup>+</sup>, 100), 271 (14), 270 (76), 242 (11), 241 (12), 226 (23), 225 (96), 224 (85), 223 (19), 197 (43), 196 (79), 195 (13), 194 (13), 177 (19), 176 (18), 170 (13), 133 (24), 98 (23), 85 (11).

HRMS (DART+, [M+H]<sup>+</sup>): Calcd for C<sub>18</sub>H<sub>16</sub>O<sub>3</sub>F 299.1078, Found 299.1081.

**Ethyl *trans*-3-oxo-2-(thiophen-2-yl)-2,3-dihydro-1*H*-indene-1-carboxylate (4am).**

**Ethyl 1-oxo-2-(thiophen-2-yl)-1*H*-indene-3-carboxylate (4am').**

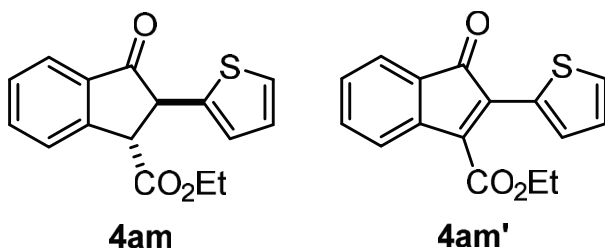

Method B was followed using **1a** (33.6 mg, 0.19 mmol) and **2m** (43.2 mg, 0.24 mmol).

Indanone **4am** and indenone **4am'** were obtained and these compounds could be separated by GPC.

#### **4am**

R<sub>f</sub> 0.14 (hexane/EtOAc = 10/1) Pale purple oil (31.0 mg, 57%).

<sup>1</sup>H NMR (CDCl<sub>3</sub>, 399.78 MHz): δ 7.85 (d, *J* = 7.8 Hz, 1H), 7.74–7.68 (m, 2H), 7.53–7.49 (m, 1H), 7.24 (dd, *J* = 4.8, 1.6 Hz, 1H), 7.01–6.98 (m, 2H), 4.67 (d, *J* = 4.6 Hz, 1H), 4.42 (d, *J* = 4.6 Hz, 1H), 4.37–4.24 (m, 2H), 1.35 (t, *J* = 7.3 Hz, 3H).

<sup>13</sup>C NMR (CDCl<sub>3</sub>, 100.53 MHz): δ 201.5, 170.9, 149.1, 139.0, 135.5, 134.7, 129.2, 127.0, 125.9, 125.8, 124.9, 124.8, 62.0, 53.5, 51.5, 14.3.

IR (ATR): 3027 w, 2970 w, 2934 w, 1731 s, 1685 w, 1604 m, 1542 w, 1473 w, 1457 w, 1319 w, 1216 m, 1199 m, 1176 m, 1011 w, 702 m, 407 w.

MS *m/z* (% relative intensity): 287 (M+H<sup>+</sup>, 17), 286 (M<sup>+</sup>, 90), 258 (30), 229 (10), 214 (21), 213 (100), 212 (79), 186 (10), 185 (51), 184 (61), 152 (31), 141 (19), 139 (23), 133 (12), 115 (22), 97 (21), 92 (29).

HRMS (DART<sup>+</sup>, [M+H]<sup>+</sup>): Calcd for C<sub>16</sub>H<sub>15</sub>O<sub>3</sub>S 287.0736, Found 287.0736.

#### **4am'**

R<sub>f</sub> 0.29 (hexane/EtOAc = 10/1) Purple oil (14.3 mg, 27%).

<sup>1</sup>H NMR (CDCl<sub>3</sub>, 399.78 MHz): δ 7.93 (dd, *J* = 3.9, 1.1 Hz, 1H), 7.56–7.53 (m, 2H), 7.43–7.42 (m, 2H), 7.25–7.21 (m, 1H), 7.15–7.12 (m, 1H), 4.48 (q, *J* = 7.2 Hz, 2H), 1.44 (t, *J* = 7.2 Hz, 3H).

<sup>13</sup>C NMR (CDCl<sub>3</sub>, 100.53 MHz): δ 195.4, 164.7, 143.5, 137.7, 134.8, 132.0, 130.8, 130.6, 129.0, 128.7, 128.4, 127.3, 124.0, 122.6, 61.7, 14.2.

IR (ATR): 2995 w, 2935 w, 1771 s, 1757 s, 1718 w, 1653 w, 1636 s, 1559 m, 1457 w, 1387 m, 1246 s, 1060 m, 846 w, 741 w, 514 w.

MS *m/z* (% relative intensity): 285 (M+H<sup>+</sup>, 20), 284 (M<sup>+</sup>, 100), 256 (14), 239 (14), 228 (28), 227 (30), 212 (25), 211 (18), 184 (14), 183 (10), 172 (10), 171 (16), 139 (58), 91 (12).

HRMS (DART<sup>+</sup>, [M+H]<sup>+</sup>): Calcd for C<sub>16</sub>H<sub>13</sub>O<sub>3</sub>S 285.0580, Found 285.0582.

#### **Ethyl *trans*-2-(4-acetylphenyl)-3-oxo-2,3-dihydro-1*H*-indene-1-carboxylate (**4ao**).**

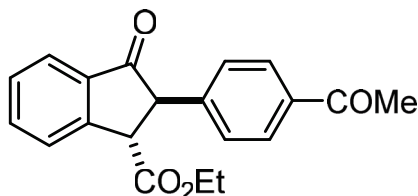

Method B was followed using **1a** (35.4 mg, 0.20 mmol) and **2o** (51.8 mg, 0.24 mmol).

R<sub>f</sub> 0.71 (EtOAc). Yellow oil (49.7 mg, 78%).

<sup>1</sup>H NMR (CDCl<sub>3</sub>, 399.78 MHz): δ 7.92 (dt, *J* = 8.2, 1.8 Hz, 2H), 7.84 (d, *J* = 7.8 Hz, 1H), 7.78–7.69 (m, 2H), 7.55–7.51 (m, 1H), 7.32–7.29 (m, 2H), 4.46 (d, *J* = 4.6 Hz, 1H), 4.35 (d, *J* = 4.6 Hz, 1H), 4.33–4.23 (m, 2H), 2.58 (s, 3H), 1.33 (t, *J* = 7.1 Hz, 3H).

<sup>13</sup>C NMR (CDCl<sub>3</sub>, 100.53 MHz): δ 202.7, 197.6, 170.9, 149.6, 143.4, 136.2, 135.6, 135.3, 129.3, 128.9, 128.5, 126.1, 124.7, 62.0, 56.3, 52.9, 26.6, 14.2.

IR (ATR): 2983 w, 1780 w, 1718 s, 1684 s, 1604 m, 1576 w, 1465 w, 1361 w, 1265 s, 1195 w, 1147 w, 1095 w, 1018 w, 959 w, 1250 w, 800 w, 758 w, 709 w, 606 m.

MS *m/z* (% relative intensity): 322 (M<sup>+</sup>, 6), 321 (16), 320 (71), 306 (22), 305 (100), 277 (33), 249 (27), 176 (19), 165 (15), 43 (31).

HRMS (DART<sup>+</sup>, [M+H]<sup>+</sup>): Calcd for C<sub>20</sub>H<sub>19</sub>O<sub>4</sub> 323.1278, Found 323.1279.

**Ethyl *trans*-3-oxo-2-(*o*-tolyl)-2,3-dihydro-1*H*-indene-1-carboxylate (4ap).**

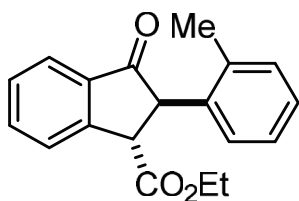

Method B was followed using **1a** (34.7 mg, 0.19 mmol) and **2p** (45.1 mg, 0.24 mmol).

R<sub>f</sub> 0.14 (hexane/EtOAc = 10/1). Yellow oil (56.2 mg, 98%).

<sup>1</sup>H NMR (CDCl<sub>3</sub>, 399.78 MHz): δ 7.86 (d, *J* = 7.3 Hz, 1H), 7.76–7.68 (m, 2H), 7.53 (t, *J* = 7.3 Hz, 1H), 7.23–7.11 (m, 3H), 6.94 (d, *J* = 7.3 Hz, 1H), 4.64 (d, *J* = 4.6 Hz, 1H), 4.35–4.20 (m, 3H), 2.34 (s, 3H), 1.33 (t, *J* = 7.1 Hz, 3H).

<sup>13</sup>C NMR (CDCl<sub>3</sub>, 100.53 MHz): δ 204.4, 171.4, 149.9, 137.1, 137.0, 135.7, 135.2, 130.8, 129.1, 128.2, 127.5, 126.4, 125.9, 124.5, 61.8, 54.1, 53.2, 20.1, 14.2.

IR (ATR): 3014 w, 2971 w, 2936 w, 1718 s, 1602 m, 1541 w, 1507 w, 1462 m, 1368 m, 1319 w, 1228 m, 1191 m, 1096 w, 1033 w, 900 w, 753 m, 731 w, 507 w, 453 w, 419 w.

MS *m/z* (% relative intensity): 294 (M<sup>+</sup>, 26), 277 (20), 276 (100), 248 (14), 222 (14), 221 (76), 220 (36), 219 (34), 203 (29), 202 (19), 193 (32), 192 (33), 191 (27), 189 (14), 179 (14), 178 (50), 165 (14), 115 (38), 92 (19), 91 (25), 89 (12).

HRMS (DART<sup>+</sup>, [M+H]<sup>+</sup>): Calcd for C<sub>19</sub>H<sub>19</sub>O<sub>3</sub> 295.1329, Found 295.1331.

**(*Z*)-3-Benzoyl-*N,N*-dimethyl-2-(trimethylsilyl)hept-2-enamide (3aq).**

***trans*-2-Butyl-*N,N*-dimethyl-3-oxo-2,3-dihydro-1*H*-indene-1-carboxamide (4aq).**

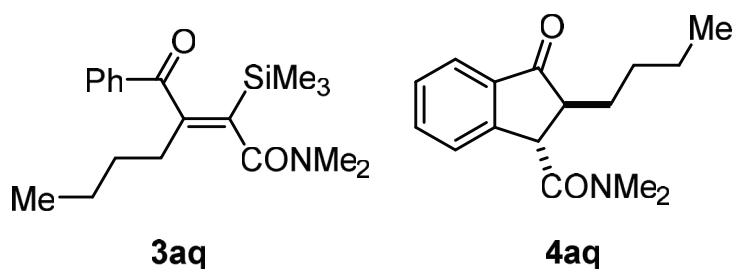

Method A was followed using **2q** (30.7mg, 0.20 mmol) and **1a** (71.2 mg, 0.40 mmol), except that Pd<sub>2</sub>(dba)<sub>3</sub> (0.0075 mmol) and IPr (0.015 mmol) were used.

Silylacylation product **3aq** and indanone **4aq** were obtained and these compounds could be separated by column chromatography.

### **3aq**

R<sub>f</sub> 0.40 (hexane/EtOAc = 3/2). Pale yellow oil (17.2 mg, 26%).

<sup>1</sup>H NMR (CDCl<sub>3</sub>, 399.78 MHz): δ 8.11–8.09 (m, 2H), 7.57–7.52 (m, 1H), 7.46–7.42 (m, 2H), 3.03 (s, 3H), 2.88 (s, 3H), 2.32–2.30 (m, 2H), 1.45–1.31 (m, 4H), 0.92 (t, *J* = 7.3 Hz, 3H), 0.05 (s, 9H).

<sup>13</sup>C NMR (CDCl<sub>3</sub>, 100.53 MHz): δ 195.8, 167.6, 152.0, 147.7, 136.9, 133.5, 130.3, 128.3, 38.3, 34.5, 34.1, 31.7, 23.2, 13.9, 0.1.

IR (ATR): 2988 w, 2943 w, 1734 s, 1719 s, 1603 w, 1559 w, 1507 w, 1472 w, 1419 w, 1230 m, 1200 m, 1079 w, 1021 w, 842 w, 710 m, 625 w, 507 w, 409 w.

MS *m/z* (% relative intensity): 331 (M<sup>+</sup>, 26), 316 (15), 288 (34), 287 (39), 275 (29), 274 (100), 229 (41), 129 (11), 105 (24), 77 (14), 75 (33), 73 (14), 72 (56).

HRMS (DART+, [M+H]<sup>+</sup>): Calcd for C<sub>19</sub>H<sub>30</sub>NO<sub>2</sub>Si 332.2040, Found 332.2041.

### **4aq**

R<sub>f</sub> 0.20 (hexane/EtOAc = 3/2). Pale yellow oil (35.9 mg, 70%).

<sup>1</sup>H NMR (CDCl<sub>3</sub>, 399.78 MHz): δ 7.68 (d, *J* = 7.8 Hz, 1H), 7.63–7.59 (m, 1H), 7.53–7.51 (m, 1H), 7.35 (t, *J* = 7.3 Hz, 1H), 4.03–3.99 (m, 1H), 3.73 (d, *J* = 3.5 Hz, 1H), 3.32 (s, 3H), 3.04 (s, 3H), 2.01–1.97 (m, 1H), 1.61–1.52 (m, 1H), 1.44–1.22 (m, 4H), 0.90 (t, *J* = 7.1 Hz, 3H).

<sup>13</sup>C NMR (CDCl<sub>3</sub>, 100.53 MHz): δ 201.4, 168.1, 158.5, 135.2, 135.0, 127.6, 125.4, 124.0, 57.9, 42.8, 38.1, 36.2, 34.8, 29.7, 22.7, 13.9.

IR (ATR): 2954 m, 2928 m, 2858 w, 1711 s, 1643 s, 1539 w, 1464 m, 1396 m, 1285 w, 1216 w, 1012 w, 762 w, 516 w, 402 w.

MS *m/z* (% relative intensity): 259 (M<sup>+</sup>, 27), 216 (11), 202 (14), 187 (37), 145 (26), 144 (13), 131 (18), 115 (13), 72 (100), 46 (10), 45 (11), 44 (21).

HRMS (DART+, [M+H]<sup>+</sup>): Calcd for C<sub>16</sub>H<sub>22</sub>NO<sub>2</sub> 260.1645, Found 260.1642.

**Ethyl *trans*-6-methoxy-3-oxo-2-phenyl-2,3-dihydro-1*H*-indene-1-carboxylate (4bj).**

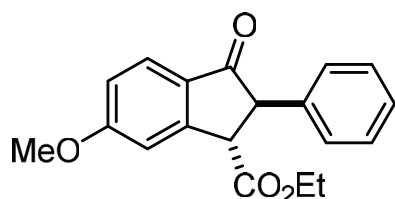

Method B was followed using **1b** (44.6 mg, 0.21 mmol) and **2j** (41.8 mg, 0.24 mmol), except that the reaction was run at 160 °C, instead of 140 °C.

R<sub>f</sub> 0.14 (hexane/EtOAc = 10/1). Pale yellow oil (22.2 mg, 34%).

<sup>1</sup>H NMR (CDCl<sub>3</sub>, 399.78 MHz): δ 7.83–7.81 (m, 1H), 7.28–7.22 (m, 3H), 7.13–7.10 (m, 2H), 7.06–7.03 (m, 2H), 4.62 (d, *J* = 8.7 Hz, 1H), 4.27 (d, *J* = 8.7 Hz, 1H), 3.92 (s, 3H), 3.77–3.61 (m, 2H), 0.80 (t, *J* = 7.1 Hz, 3H).

<sup>13</sup>C NMR (CDCl<sub>3</sub>, 100.53 MHz): δ 201.7, 170.3, 165.7, 153.3, 136.5, 130.3, 129.2, 128.4, 127.5, 126.0, 117.0, 110.4, 60.9, 56.8, 55.8, 51.0, 13.5.

IR (ATR): 2970 w, 2944 w, 1735 s, 1716 s, 1521 w, 1507 w, 1490 w, 1367 m, 1254 m, 1217 m, 1093 w, 1037 w, 700 m, 505 w, 470 w, 418 w.

MS *m/z* (% relative intensity): 311 (M+H<sup>+</sup>, 20), 310 (100), 282 (34), 238 (21), 237 (88), 236 (74), 209 (45), 208 (18), 194 (25), 178 (14), 177 (11), 166 (16), 165 (53).

HRMS (DART+, [M+H]<sup>+</sup>): Calcd for C<sub>19</sub>H<sub>19</sub>O<sub>4</sub> 311.1278, Found 311.1277.

**Ethyl *trans*-6-fluoro-3-oxo-2-phenyl-2,3-dihydro-1*H*-indene-1-carboxylate (4dj).**

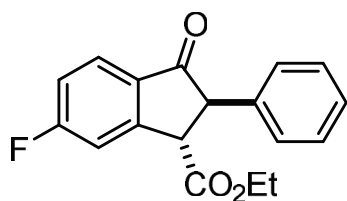

Method B was followed using **1d** (39.3mg, 0.20 mmol) and **2j** (41.8mg, 0.24 mmol), except that the reaction was run at 160 °C, instead of 140 °C.

R<sub>f</sub> 0.23 (hexane/EtOAc = 10/1). Pale yellow oil (37.7 mg, 63%).

<sup>1</sup>H NMR (CDCl<sub>3</sub>, 399.78 MHz): δ 7.85 (dd, *J* = 5.5, 8.2 Hz, 1H), 7.44–7.42 (m, 1H), 7.36–7.27 (m, 3H), 7.24–7.17 (m, 3H), 4.41 (d, *J* = 4.6 Hz, 1H), 4.35–4.22 (m, 3H), 1.34 (t, *J* = 7.1 Hz, 3H).

<sup>13</sup>C NMR (CDCl<sub>3</sub>, 100.53 MHz): δ 201.8, 170.6, 167.3 (d, *J* = 257.8 Hz), 152.6 (d, *J* = 10.5 Hz), 137.9, 132.0, 129.0, 128.2, 127.6, 126.9 (d, *J* = 10.5 Hz), 117.4 (d, *J* = 23.0 Hz), 113.2 (d, *J* = 23.0 Hz), 62.1, 56.6, 53.1, 14.2.

<sup>19</sup>F NMR (CDCl<sub>3</sub>, 376.17 MHz) δ -102.2.

IR (ATR): 2985 w, 2971 w, 1724 s, 1611 m, 1593 m, 1507 w, 1474 w, 1436 w, 1371 m, 1243 s, 1217

s, 1089 m, 1038 m, 746 w, 700 m, 519 w, 434 w, 418 w.

MS m/z (% relative intensity): 299 (M+H<sup>+</sup>, 22), 298 (M<sup>+</sup>, 100), 270 (48), 226 (23), 225 (97), 224 (85), 223 (18), 197 (58), 196 (75), 195 (12), 194 (12), 177 (19), 176 (17), 170 (12), 151 (10), 98 (17), 85 (11).

HRMS (DART+, [M+H]<sup>+</sup>): Calcd for C<sub>18</sub>H<sub>16</sub>O<sub>3</sub>F 299.1078, Found 299.1077.

#### Ethyl 5-cyano-1-oxo-2-phenyl-1*H*-indene-3-carboxylate (**4ej**).

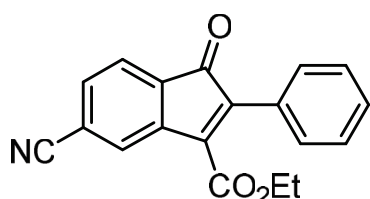

Method B was followed using **1e** (44.7mg, 0.22 mmol) and **2j** (41.8mg, 0.24 mmol), except that the reaction was run at 160 °C, instead of 140 °C.

R<sub>f</sub> 0.14 (hexane/EtOAc = 10/1). Yellow oil (39.9 mg, 60%).

<sup>1</sup>H NMR (CDCl<sub>3</sub>, 399.78 MHz): δ 7.90 (s, 1H), 7.68–7.62 (m, 2H), 7.44–7.41 (m, 5H), 4.34 (q, *J* = 7.3 Hz, 2H), 1.24 (t, *J* = 7.3 Hz, 3H).

<sup>13</sup>C NMR (CDCl<sub>3</sub>, 100.53 MHz): δ 194.4, 163.6, 143.4, 141.1, 140.3, 133.8, 132.1, 129.84, 129.81, 128.8, 128.0, 125.6, 123.7, 117.9, 117.6, 61.9, 13.8.

IR (ATR): 2982 w, 1723 s, 1670 w, 1636 w, 1607 m, 1541 w, 1507 w, 1457 w, 1419 w, 1215 s, 1183 m, 1137 w, 1065 m, 847 w, 792 w, 695 m, 546 w, 459 w, 419 w.

MS m/z (% relative intensity): 305 (M+2H<sup>+</sup>, 13), 304 (M+H<sup>+</sup>, 21), 303 (M<sup>+</sup>, 100), 276 (11), 275 (62), 274 (71), 258 (21), 247 (40), 246 (19), 232 (22), 231 (37), 230 (64), 219 (11), 207 (12), 204 (11), 203 (25), 202 (23), 201 (42), 190 (24), 176 (18), 175 (25), 174 (10), 87 (17), 77 (10).

HRMS (DART+, [M+H]<sup>+</sup>): Calcd for C<sub>19</sub>H<sub>14</sub>NO<sub>3</sub> 304.0968, Found 304.0978.

#### Ethyl *trans*-5,7-dimethyl-3-oxo-2-phenyl-2,3-dihydro-1*H*-indene-1-carboxylate (**4fj**).

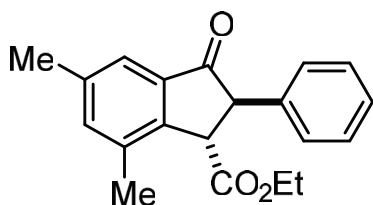

Method B was followed using **1f** (42.2mg, 0.20 mmol) and **2j** (41.8mg, 0.24 mmol), except that the reaction was run at 160 °C, instead of 140 °C.

R<sub>f</sub> 0.14 (hexane/EtOAc = 10/1). Pale yellow oil (43.2 mg, 68%).

<sup>1</sup>H NMR (CDCl<sub>3</sub>, 399.78 MHz): δ 7.50 (s, 1H), 7.33–7.27 (m, 4H), 7.14–7.11 (m, 2H), 4.25–4.17 (m,

3H), 4.06 (d,  $J = 3.2$  Hz, 1H), 2.41 (s, 3H), 2.35 (s, 3H), 1.26 (t,  $J = 7.4$  Hz, 3H).

$^{13}\text{C}$  NMR ( $\text{CDCl}_3$ , 100.53 MHz):  $\delta$  204.0, 172.5, 146.9, 139.5, 138.4, 137.9, 136.4, 135.9, 128.9, 127.7, 127.4, 122.3, 61.5, 58.7, 52.6, 21.1, 18.0, 14.1.

IR (ATR): 2971 w, 1737 s, 1713 s, 1647 w, 1521 w, 1507 w, 1489 w, 1369 m, 1306 m, 1232 m, 1173 m, 1036 w, 701 m, 519 w, 460 w, 403 w.

MS  $m/z$  (% relative intensity): 309 ( $\text{M}^+ \text{H}^+$ , 22), 308 (98), 280 (20), 236 (21), 235 (100), 234 (87), 207 (30), 193 (11), 192 (34), 191 (35), 190 (11), 189 (15), 165 (11), 129 (16), 115 (25), 105 (11), 91 (11).

HRMS (DART+,  $[\text{M}+\text{H}]^+$ ): Calcd for  $\text{C}_{20}\text{H}_{21}\text{O}_3$  309.1485, Found 309.1482.

#### Ethyl *trans*-1-oxo-2-phenyl-2,3-dihydro-1*H*-cyclopenta[*a*]naphthalene-3-carboxylate (**4gj**).

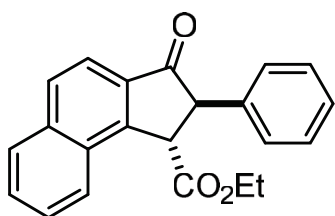

Method B was followed using **1g** (42.4mg, 0.19 mmol) and **2j** (41.8mg, 0.24 mmol).

$R_f$  0.20 (hexane/EtOAc = 10/1). yellowish oil (32.0mg, 52%).

$^1\text{H}$  NMR ( $\text{CDCl}_3$ , 399.78 MHz):  $\delta$  8.19 (d,  $J = 7.8$  Hz, 1H), 8.01 (d,  $J = 7.8$ , 1H), 7.96 (d,  $J = 8.2$ , 1H), 7.83 (d,  $J = 8.2$  Hz, 1H), 7.74-7.64 (m, 2H), 7.33-7.25 (m, 3H), 7.18-7.15 (m, 2H), 4.75 (d,  $J = 2.7$  Hz, 1H), 4.29-4.15 (m, 3H), 1.23 (t,  $J = 7.1$  Hz, 3H).

$^{13}\text{C}$  NMR ( $\text{CDCl}_3$ , 100.53 MHz):  $\delta$  203.6, 172.4, 151.5, 138.2, 137.2, 134.2, 130.5, 130.0, 129.5, 129.2, 129.0, 127.7, 127.63, 127.56, 124.8, 120.1, 61.8, 58.3, 53.0, 14.1.

IR (ATR): 3026 w, 3003 w, 2970 w, 1734 s, 1716 s, 1670 w, 1625 w, 1507 w, 1457 m, 1367 m, 1229 m, 1217 m, 1036 w, 757 w, 697 w, 536 w, 414 w.

MS  $m/z$  (% relative intensity): 330 ( $\text{M}^+$ , 12), 258 (13), 257 (60), 256 (16), 229 (11), 207 (12), 156 (12), 155 (100), 128 (13), 127 (94), 126 (11), 77 (10).

HRMS (DART+,  $[\text{M}+\text{H}]^+$ ): Calcd for  $\text{C}_{22}\text{H}_{19}\text{O}_3$  331.1329, Found 331.1327.

## VII. DFT Calculations

### VII -1. Computational details

Calculations were performed with the Gaussian 09 (G09RevD.01) program.<sup>13</sup> Geometry optimizations and frequency calculations for all reported structures were performed using the  $\omega\text{B97XD}$  functional<sup>14</sup> with a basis set consisting of the LANL2DZ basis set for Pd and 6-31G\* for the rest. Single-point energy calculations of the optimized structures were separately calculated using the  $\omega\text{B97XD}$

functional with a basis set consisting of the SDD basis set for metallic atoms (Pd) and 6-311+G\* for the rest. Gibbs free energies were estimated by sum of the electronic energies at the higher-level single point energy calculations and the thermal corrections at the lower-level calculations. Each reported minimum has zero imaginary frequency and each transition state (TS) structure has only one imaginary frequency. From TSs, reaction paths were traced by the intrinsic reaction coordinate (IRC) method<sup>15</sup> followed by geometry optimization to obtain the energy-minimum geometries. Energy changes were shown by the use of Gibbs free energies (T = 298.15 K and P = 1 atm).

## VII -2. Computed energy profiles

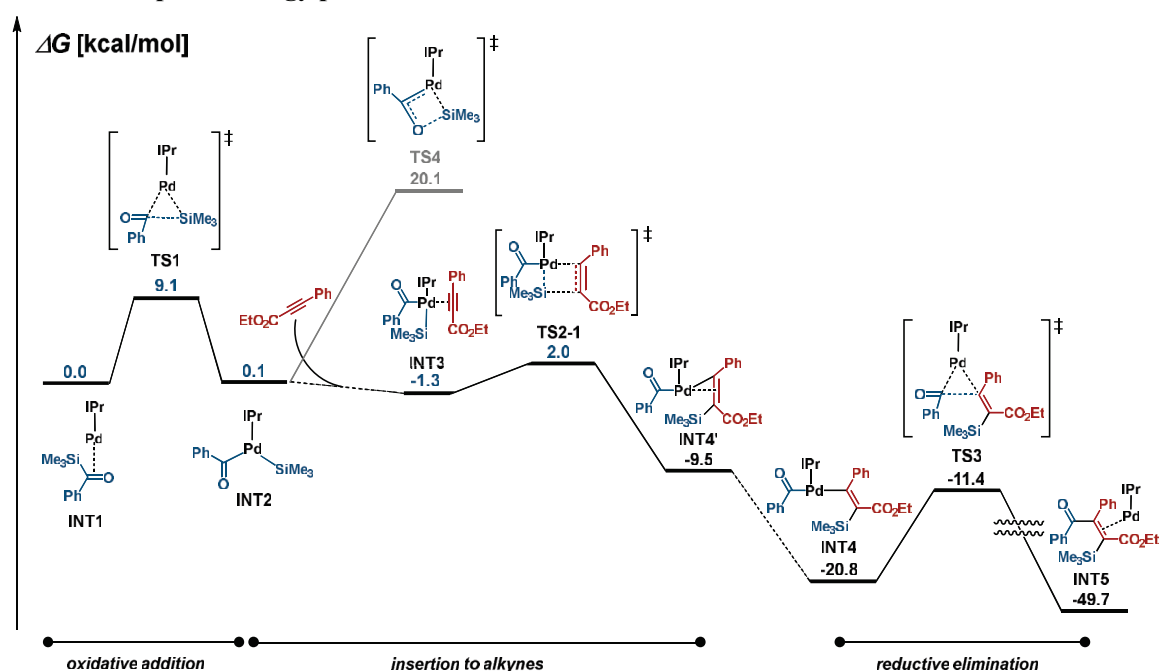

**Figure S1.** Computed energy profiles of the Pd-catalyzed silylacylation pathways of acylsilane **1a** with alkyne **2j** at the  $\omega$ B97XD/SDD-6-311+G\*// $\omega$ B97XD/LANL2DZ-6-31G\* level of theory.



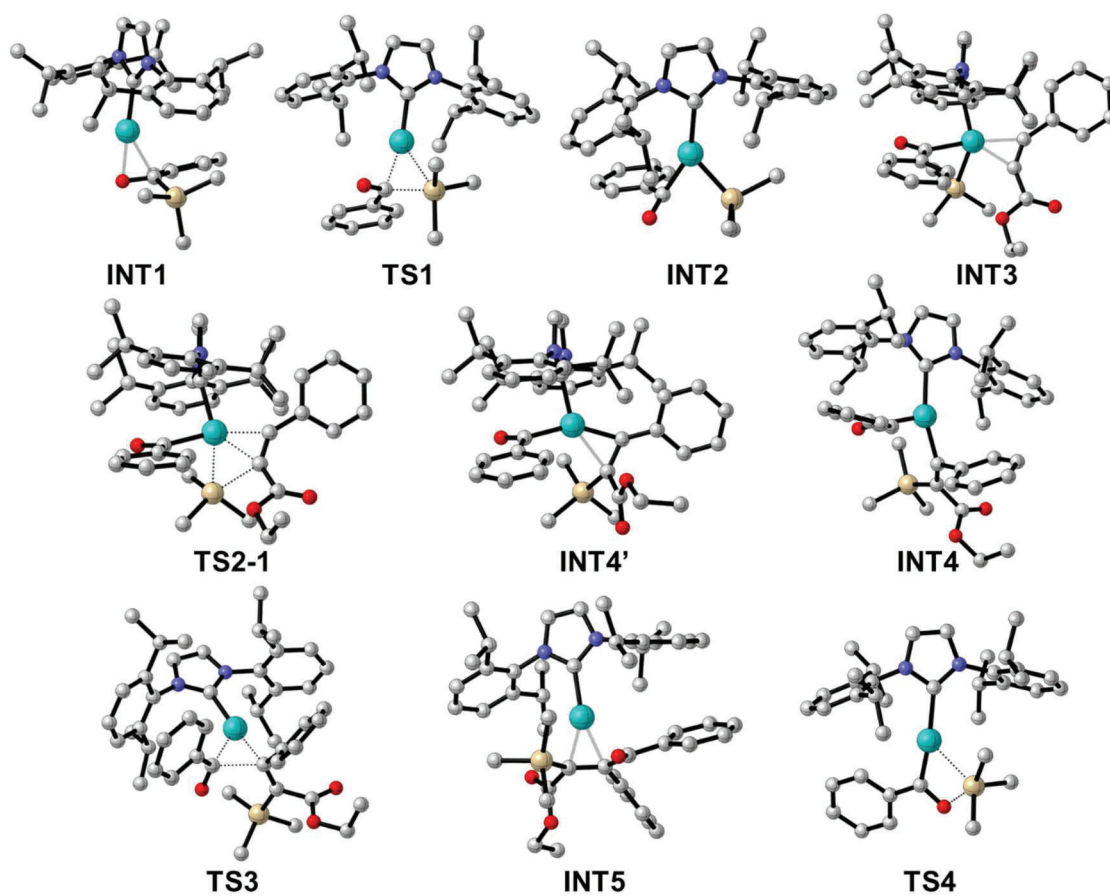

**Figure S2.** Structures of the intermediates and transition states shown in **Figure S1**.

Eight different transition states were investigated for the addition of a silyl group or an acyl group in **INT2** across an alkyne moiety (**Figure S3**). These transition states are distinguished by which silyl or benzoyl groups are inserted into the alkyne, the orientation of the alkyne, and whether the silyl and benzoyl groups are located in a *cis* or *trans* configuration. Among the eight transition states, **TS2-1** and **TS2-2** turned out to be the energetically most favored transition state ( $\Delta G^\ddagger = 2.0$  kcal/mol).

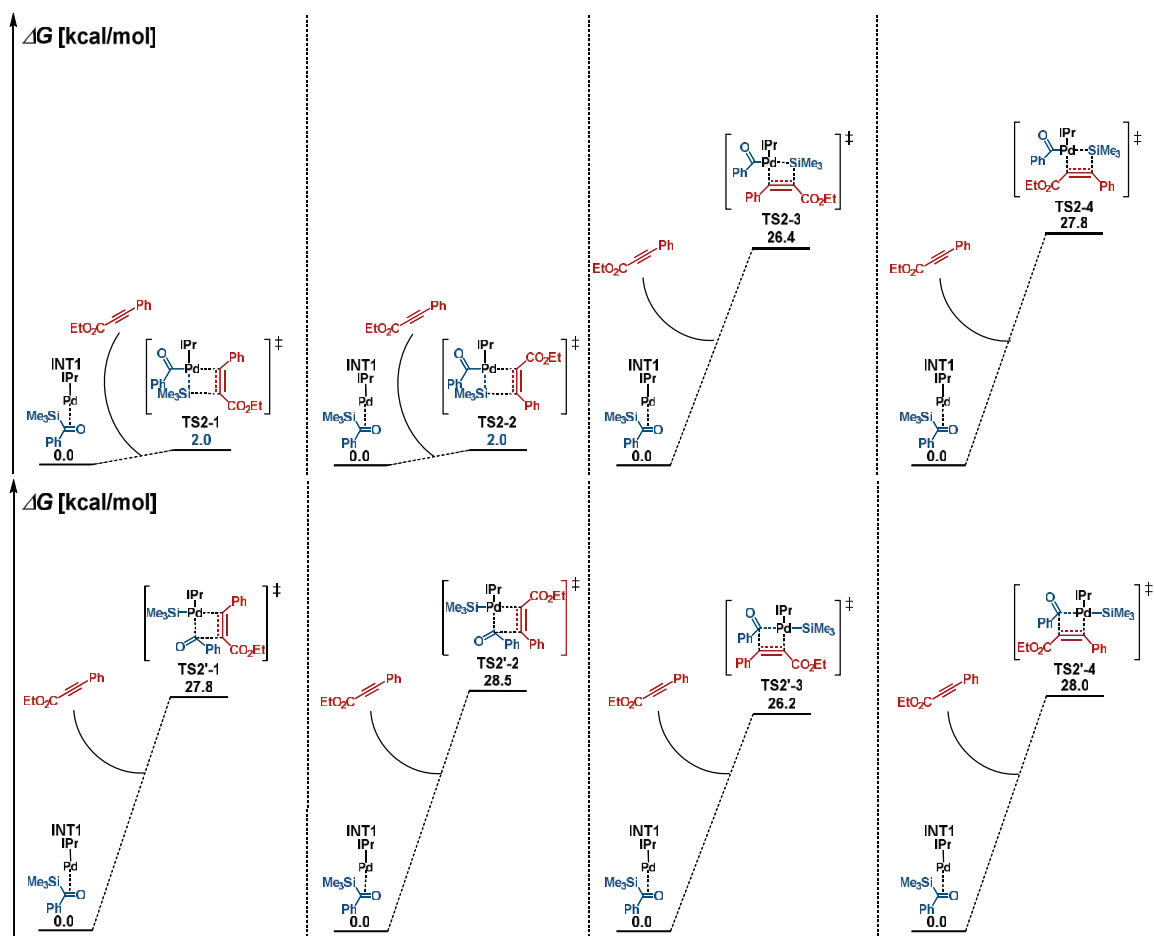

**Figure S3.** Energy comparison of possible eight transition states for silylpalladation and benzoylpalladation at the  $\omega$ B97XD/SDD-6-311+G\*\*// $\omega$ B97XD/LANL2DZ-6-31G\* level of theory.

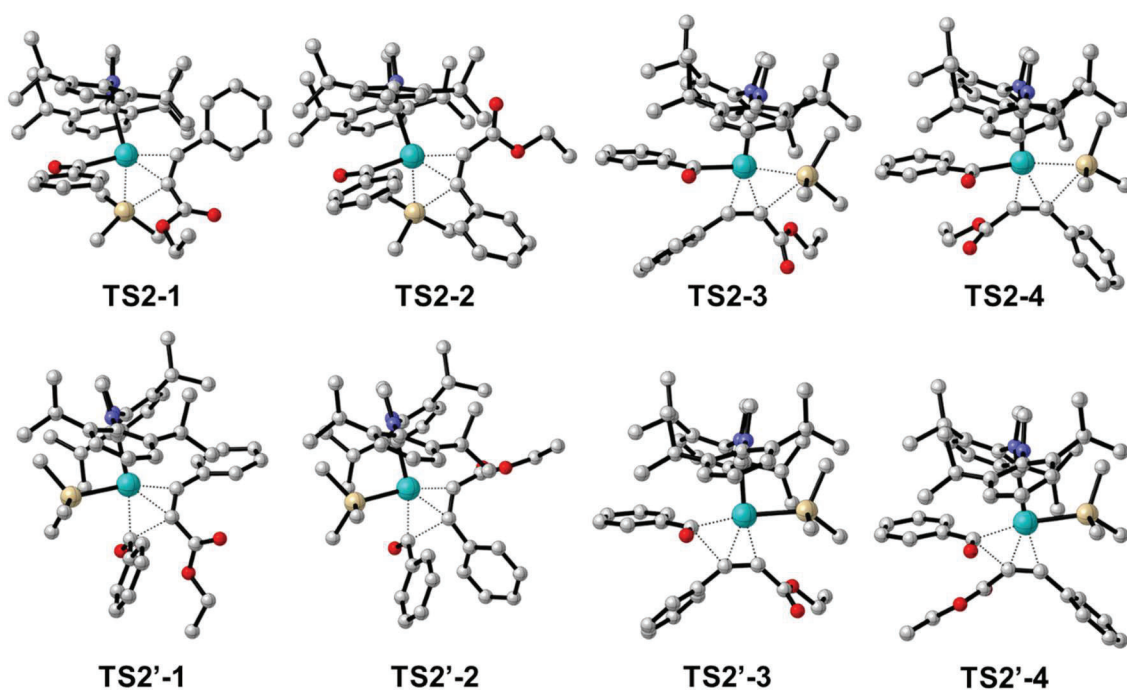

**Figure S4.** Structures of the transition states shown in **Figure S3**.

If the numbers of atoms for the two species to be compared are different, the free energy ( $G$ ) must be used for the comparison because of the large influence of the entropy term. In contrast, in insertion reactions from  $\pi$ -complexes, the number of atoms are unchanged and can be regarded as intramolecular reactions in terms of the computational model. Therefore, the total electron energy ( $E$ ) may be used for more accurate comparison. Therefore,  $E_s$  of **TS2-1** and **TS2-2** were compared, which revealed that **TS2-1** is more favored than **TS2-2**.

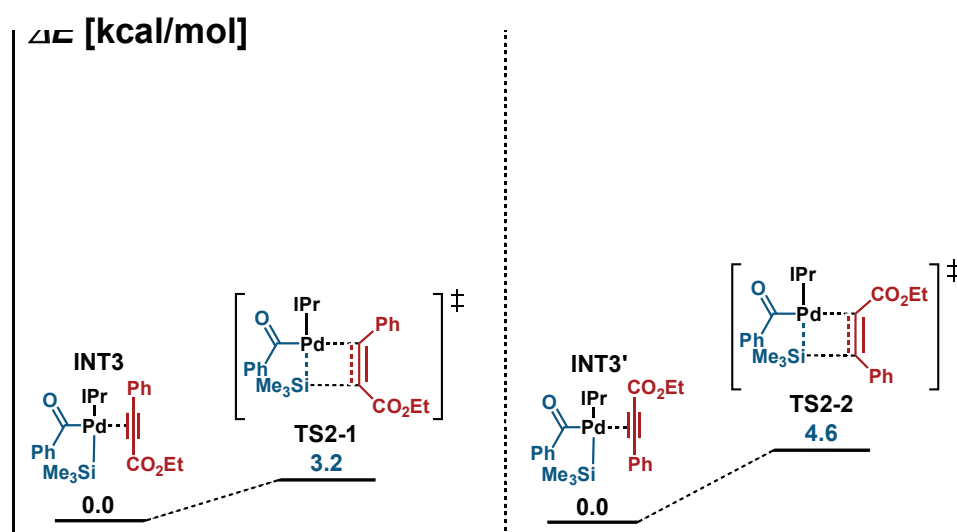

**Figure S5.** Comparison of **TS2-1** and **TS2-2** with the total electron energy at the  $\omega$ B97XD/SDD-6-

311+G\*// $\omega$ B97XD/LANL2DZ-6-31G\* level of theory.

### VIII. Cartesian Coordinates and Energies of Optimized Structures

|                                                               |             |             |             |   |             |             |             |
|---------------------------------------------------------------|-------------|-------------|-------------|---|-------------|-------------|-------------|
| INT1                                                          |             |             |             | C | 2.49033100  | -0.08138500 | 4.56814200  |
| SCF Done: E(R $\omega$ B97XD) = -2040.60093966                | A.U.        |             |             | H | 3.33965700  | 0.60513000  | 4.47813300  |
| Sum of electronic and thermal Free Energies = -2039.896292    | A.U.        |             |             | H | 1.82496100  | 0.32887700  | 5.33499200  |
| SCF Done (single point): E(R $\omega$ B97XD) = -2042.15554812 | A.U.        |             |             | H | 2.86833300  | -1.04616400 | 4.92265600  |
| no imaginary frequency                                        |             |             |             | C | 1.27705700  | 1.15469200  | 2.73054500  |
| N                                                             | -1.63525200 | -1.59252600 | 0.89482900  | H | 0.60250800  | 1.63016800  | 3.45171100  |
| N                                                             | 0.43565900  | -1.88271700 | 1.30498700  | H | 2.14204400  | 1.81377200  | 2.59261200  |
| C                                                             | -0.40277900 | -1.14589500 | 0.52658000  | H | 0.75462200  | 1.07354100  | 1.77192000  |
| C                                                             | -2.85216500 | -1.07117100 | 0.34679000  | C | -3.56385200 | -3.96435500 | -1.79006500 |
| C                                                             | -3.46723700 | 0.00133300  | 1.00369600  | H | -4.38689500 | -3.71234300 | -2.46811400 |
| C                                                             | -4.63321900 | 0.51628000  | 0.43771000  | H | -3.00537300 | -4.79034000 | -2.24369400 |
| C                                                             | -5.15524300 | -0.01920000 | -0.73273300 | H | -3.99948000 | -4.32041100 | -0.85051500 |
| C                                                             | -4.51955700 | -1.08176600 | -1.36231500 | C | -2.02185400 | -2.26820700 | -2.87102300 |
| C                                                             | -3.35086200 | -1.63155000 | -0.83573700 | H | -1.47055800 | -3.07714500 | -3.36363900 |
| C                                                             | -2.87623700 | 0.62645900  | 2.25621000  | H | -2.79540000 | -1.91271700 | -3.56133400 |
| C                                                             | -2.63777900 | -2.76447300 | -1.55607400 | H | -1.32557800 | -1.43868000 | -2.69051100 |
| C                                                             | 1.86156600  | -1.78036200 | 1.23863600  | C | 2.35546100  | -4.85117300 | -0.60759600 |
| C                                                             | 2.53079600  | -2.48527000 | 0.23269700  | H | 1.76967600  | -5.53067300 | -1.23615700 |
| C                                                             | 3.91480000  | -2.31970400 | 0.14918100  | H | 3.39807800  | -4.90847000 | -0.93999100 |
| C                                                             | 4.59020400  | -1.50776200 | 1.04943800  | H | 2.31132000  | -5.21534400 | 0.42443000  |
| C                                                             | 3.89971000  | -0.85168600 | 2.06314000  | C | 1.84154400  | -2.91884200 | -2.16572700 |
| C                                                             | 2.51539300  | -0.96970200 | 2.17815100  | H | 1.29766200  | -3.61030500 | -2.81928000 |
| C                                                             | 1.80418200  | -3.42308300 | -0.71929900 | H | 1.37306000  | -1.93155100 | -2.24061500 |
| C                                                             | 1.72998800  | -0.22024200 | 3.24571300  | H | 2.86933000  | -2.83852600 | -2.53863200 |
| H                                                             | -5.13085000 | 1.35777600  | 0.91135400  | C | -2.35867200 | 2.03769900  | 1.95680100  |
| H                                                             | -4.93246000 | -1.48346800 | -2.28333500 | H | -3.17145600 | 2.70562200  | 1.65080700  |
| H                                                             | -2.01355500 | 0.02799400  | 2.56549700  | H | -1.88528500 | 2.46926300  | 2.84570500  |
| H                                                             | -1.81427400 | -3.10719300 | -0.92161100 | H | -1.62028100 | 2.01752900  | 1.15034400  |
| H                                                             | 4.46842100  | -2.83487200 | -0.63087600 | C | -3.87479500 | 0.62206500  | 3.42003300  |
| H                                                             | 4.44793100  | -0.22667500 | 2.76063900  | H | -4.22934700 | -0.39127400 | 3.63782400  |
| H                                                             | 0.75168100  | -3.45882600 | -0.42243100 | H | -3.40294900 | 1.02270800  | 4.32377000  |
| H                                                             | 0.82337600  | -0.79793300 | 3.45653000  | H | -4.75044600 | 1.24387300  | 3.20193400  |

|                                            |             |             |             |                                                                 |             |             |             |
|--------------------------------------------|-------------|-------------|-------------|-----------------------------------------------------------------|-------------|-------------|-------------|
| H                                          | 5.66597600  | -1.38608100 | 0.96501500  | Sum of electronic and thermal Free Energies = -2039.881515 A.U. |             |             |             |
| H                                          | -6.06076100 | 0.39946100  | -1.16201200 | SCF Done (single point): E(RoB97XD) = -2042.13858055 A.U.       |             |             |             |
| Pd                                         | -0.08149700 | 0.13883800  | -1.02937900 | $v_i = -123.18 \text{ cm}^{-1}$                                 |             |             |             |
| C                                          | 0.03326700  | 3.14698700  | -0.80139300 | N                                                               | 0.41968500  | 2.15387100  | 0.87459700  |
| C                                          | 0.55168900  | 3.70813500  | 0.36897300  | N                                                               | -1.53709600 | 1.37944700  | 1.20947500  |
| H                                          | 1.49354100  | 3.34780600  | 0.76691300  | C                                                               | -0.38327500 | 1.10868800  | 0.54297400  |
| C                                          | -1.19783500 | 3.60842600  | -1.28288100 | C                                                               | 1.75290800  | 2.28518500  | 0.36766900  |
| H                                          | -1.59387100 | 3.16451200  | -2.19029400 | C                                                               | 2.80980800  | 1.77030600  | 1.12820200  |
| C                                          | -1.88984300 | 4.60510400  | -0.60830100 | C                                                               | 4.09395700  | 1.87518400  | 0.59401600  |
| H                                          | -2.84172100 | 4.95746200  | -0.99614300 | C                                                               | 4.30492500  | 2.46341500  | -0.64653100 |
| C                                          | -0.14593900 | 4.70050200  | 1.04980700  | C                                                               | 3.23327800  | 2.95288900  | -1.38217200 |
| H                                          | 0.26687600  | 5.11888600  | 1.96347700  | C                                                               | 1.93029700  | 2.86898400  | -0.89283700 |
| C                                          | -1.36731500 | 5.15584400  | 0.56169700  | C                                                               | 2.57920300  | 1.07187700  | 2.45857800  |
| H                                          | -1.90988400 | 5.93530700  | 1.08902900  | C                                                               | 0.75898100  | 3.35276500  | -1.73165000 |
| C                                          | 0.77697700  | 2.09497300  | -1.57166800 | C                                                               | -2.69073900 | 0.52936000  | 1.19015400  |
| C                                          | -1.56643900 | -2.57664500 | 1.86542400  | C                                                               | -3.60297100 | 0.65139700  | 0.12992900  |
| C                                          | -0.25322300 | -2.76242600 | 2.12487500  | C                                                               | -4.73689800 | -0.15943200 | 0.16865300  |
| H                                          | -2.45093400 | -3.03904500 | 2.27345900  | C                                                               | -4.93057400 | -1.07190900 | 1.19894400  |
| H                                          | 0.25723900  | -3.42646800 | 2.80418200  | C                                                               | -3.98734900 | -1.20132400 | 2.20825700  |
| O                                          | 0.17410100  | 1.54631800  | -2.56328500 | C                                                               | -2.84512000 | -0.39921100 | 2.22700300  |
| Si                                         | 2.69678300  | 2.03081800  | -1.69061300 | C                                                               | -3.33794400 | 1.60056100  | -1.03075800 |
| C                                          | 3.16812100  | 0.45463400  | -2.59221500 | C                                                               | -1.77191100 | -0.58943300 | 3.28822600  |
| H                                          | 3.18845700  | -0.38333200 | -1.88826800 | H                                                               | 4.93860600  | 1.47709900  | 1.14920700  |
| H                                          | 2.43987100  | 0.22606900  | -3.37612500 | H                                                               | 3.40921400  | 3.39243100  | -2.35982800 |
| H                                          | 4.16068400  | 0.54609700  | -3.04891000 | H                                                               | 1.52368300  | 1.18621500  | 2.72453700  |
| C                                          | 3.63943600  | 2.07701500  | -0.05914100 | H                                                               | -0.15735000 | 3.21932300  | -1.14892100 |
| H                                          | 3.61141300  | 3.05373400  | 0.43472300  | H                                                               | -5.47081100 | -0.09841300 | -0.62754100 |
| H                                          | 3.25457500  | 1.31891000  | 0.62842800  | H                                                               | -4.13816600 | -1.94049900 | 2.98878800  |
| H                                          | 4.69200400  | 1.83593800  | -0.25297600 | H                                                               | -2.25812900 | 1.57310000  | -1.21890700 |
| C                                          | 3.15222200  | 3.55172000  | -2.71348100 | H                                                               | -1.17363400 | 0.32654000  | 3.33461200  |
| H                                          | 4.23553900  | 3.62048400  | -2.86692800 | C                                                               | -2.34703900 | -0.82374100 | 4.68901500  |
| H                                          | 2.67126200  | 3.51206400  | -3.69690600 | H                                                               | -2.85021300 | -1.79386400 | 4.76798700  |
| H                                          | 2.82208800  | 4.47118400  | -2.21675900 | H                                                               | -1.53917700 | -0.81912300 | 5.42822700  |
|                                            |             |             |             | H                                                               | -3.06689100 | -0.04565300 | 4.96367400  |
| <b>TS1</b>                                 |             |             |             | C                                                               | -0.82766400 | -1.72797000 | 2.87399600  |
| SCF Done: E(RoB97XD) = -2040.59617319 A.U. |             |             |             | H                                                               | -0.02709500 | -1.85353700 | 3.61216200  |

|    |             |             |             |                                                              |             |             |             |
|----|-------------|-------------|-------------|--------------------------------------------------------------|-------------|-------------|-------------|
| H  | -1.37537200 | -2.67538000 | 2.79638500  | C                                                            | 1.93490800  | -3.96646300 | 1.31693100  |
| H  | -0.36841200 | -1.51753100 | 1.90234200  | H                                                            | 1.39693500  | -4.48023700 | 2.10816600  |
| C  | 0.87680900  | 4.84648300  | -2.05911700 | C                                                            | 3.32405500  | -3.89842500 | 1.34317400  |
| H  | 1.75978100  | 5.05555500  | -2.67365900 | H                                                            | 3.87456400  | -4.36173400 | 2.15699700  |
| H  | -0.00357100 | 5.18251800  | -2.61797200 | C                                                            | 1.17273700  | -1.94322600 | -1.80912000 |
| H  | 0.95298000  | 5.44728500  | -1.14636400 | C                                                            | -0.20852200 | 3.04806500  | 1.72482100  |
| C  | 0.61356400  | 2.50337300  | -3.00161200 | C                                                            | -1.44864200 | 2.55622700  | 1.94066400  |
| H  | -0.28592900 | 2.79941500  | -3.55440300 | H                                                            | 0.28409900  | 3.93487800  | 2.09020700  |
| H  | 1.47543800  | 2.63055200  | -3.66681400 | H                                                            | -2.26853800 | 2.91842400  | 2.54048300  |
| H  | 0.53559400  | 1.43968000  | -2.75196600 | O                                                            | 1.79932900  | -1.38033600 | -2.71859200 |
| C  | -3.72602100 | 3.04601800  | -0.68553700 | Si                                                           | -0.76114500 | -2.30122300 | -2.32183400 |
| H  | -3.50093200 | 3.70962100  | -1.52802100 | C                                                            | -1.22397400 | -1.04289800 | -3.64344900 |
| H  | -4.79949900 | 3.11732800  | -0.47425300 | H                                                            | -1.60485500 | -0.11627800 | -3.20420200 |
| H  | -3.18062200 | 3.41798400  | 0.18621400  | H                                                            | -0.32738500 | -0.79594700 | -4.22062000 |
| C  | -4.02924400 | 1.16575200  | -2.32654100 | H                                                            | -1.98176100 | -1.44608800 | -4.32622700 |
| H  | -3.64642400 | 1.75736700  | -3.16450100 | C                                                            | -2.19288500 | -2.63734100 | -1.12532400 |
| H  | -3.84432800 | 0.10960200  | -2.54563800 | H                                                            | -1.95555300 | -3.43081200 | -0.40819400 |
| H  | -5.11327900 | 1.32478500  | -2.28365100 | H                                                            | -2.49016200 | -1.75090700 | -0.56007800 |
| C  | 2.85309500  | -0.43223500 | 2.33228100  | H                                                            | -3.05842500 | -2.97773200 | -1.71026300 |
| H  | 3.90011700  | -0.62457800 | 2.07281600  | C                                                            | -0.42141100 | -3.96171200 | -3.17094000 |
| H  | 2.64100400  | -0.94106800 | 3.27959700  | H                                                            | -1.33826300 | -4.34209400 | -3.63821300 |
| H  | 2.22759900  | -0.87937500 | 1.55330200  | H                                                            | 0.34308900  | -3.85525600 | -3.94743600 |
| C  | 3.40586800  | 1.70265000  | 3.58557900  | H                                                            | -0.07214300 | -4.71347300 | -2.45405200 |
| H  | 3.19967400  | 2.77408800  | 3.68108300  |                                                              |             |             |             |
| H  | 3.17162400  | 1.22162800  | 4.54153200  | <b>INT2</b>                                                  |             |             |             |
| H  | 4.48103800  | 1.58212000  | 3.41160900  | SCF Done: $E(R\omega B97XD) = -2040.61071434$                | A.U.        |             |             |
| H  | -5.81637000 | -1.70035800 | 1.20290200  | Sum of electronic and thermal Free Energies = -2039.893007   | A.U.        |             |             |
| H  | 5.31123600  | 2.53143000  | -1.04936300 | SCF Done (single point): $E(R\omega B97XD) = -2042.15610189$ | A.U.        |             |             |
| Pd | 0.19383500  | -0.46628600 | -0.65976700 | no imaginary frequency                                       |             |             |             |
| C  | 1.91221800  | -2.69235500 | -0.74309500 | N                                                            | -0.07866200 | 1.76098100  | 1.37018500  |
| C  | 1.23191600  | -3.36643300 | 0.27589000  | N                                                            | -1.94968600 | 0.74284500  | 1.39533700  |
| H  | 0.14751600  | -3.41234500 | 0.26275300  | C                                                            | -0.74301800 | 0.73253900  | 0.78379500  |
| C  | 3.31105600  | -2.63416200 | -0.71109200 | C                                                            | 1.26204300  | 2.09766700  | 0.97968000  |
| H  | 3.81969400  | -2.09808900 | -1.50586600 | C                                                            | 2.32523500  | 1.58032100  | 1.73414200  |
| C  | 4.01107200  | -3.23458100 | 0.32438500  | C                                                            | 3.61673200  | 1.83578200  | 1.27642100  |
| H  | 5.09582100  | -3.18081900 | 0.34914000  | C                                                            | 3.83039700  | 2.57934700  | 0.12224500  |

|   |             |             |             |    |             |             |             |
|---|-------------|-------------|-------------|----|-------------|-------------|-------------|
| C | 2.75727100  | 3.08260600  | -0.59944800 | C  | -5.37174100 | 2.25063900  | -0.63584000 |
| C | 1.44425600  | 2.84646900  | -0.19159500 | H  | -5.26453500 | 3.28737700  | -0.97128800 |
| C | 2.08485100  | 0.70572900  | 2.95489700  | H  | -5.93339800 | 1.71851300  | -1.41158700 |
| C | 0.27726600  | 3.38952900  | -1.00015100 | H  | -5.96948300 | 2.24706300  | 0.28178800  |
| C | -3.00605400 | -0.17558100 | 1.08828700  | C  | -3.19709400 | 1.56480000  | -1.72746100 |
| C | -4.03607300 | 0.26018600  | 0.24096700  | H  | -3.11510000 | 2.56035700  | -2.17895100 |
| C | -5.05566600 | -0.64683300 | -0.04221000 | H  | -2.18571700 | 1.17571100  | -1.56839800 |
| C | -5.03369100 | -1.93273900 | 0.48653400  | H  | -3.70088900 | 0.90516400  | -2.44368900 |
| C | -3.99221100 | -2.33629100 | 1.30880100  | C  | 2.15680500  | -0.77647100 | 2.56283300  |
| C | -2.95267200 | -1.46250300 | 1.63301000  | H  | 3.14463500  | -1.02584200 | 2.16001300  |
| C | -3.98747700 | 1.63512500  | -0.41068500 | H  | 1.96649000  | -1.41465900 | 3.43404000  |
| C | -1.80380400 | -1.92533000 | 2.51481700  | H  | 1.41811900  | -1.01674600 | 1.79108900  |
| H | 4.46749500  | 1.42931800  | 1.81365800  | C  | 3.04511700  | 1.01987000  | 4.10749700  |
| H | 2.93948300  | 3.64792500  | -1.50804400 | H  | 3.04118800  | 2.08705900  | 4.35318100  |
| H | 1.07115300  | 0.90028100  | 3.32111100  | H  | 2.74961200  | 0.46040300  | 5.00139800  |
| H | -0.64159400 | 2.93496800  | -0.61943400 | H  | 4.07478900  | 0.73063000  | 3.87074100  |
| H | -5.86947400 | -0.35418000 | -0.69744000 | H  | -5.83114900 | -2.62869200 | 0.24412300  |
| H | -3.98124700 | -3.34820200 | 1.70356200  | H  | 4.84421100  | 2.75849000  | -0.22354900 |
| H | -3.44171400 | 2.30906200  | 0.25849700  | Pd | 0.30987500  | -0.33457600 | -0.74412900 |
| H | -1.17160500 | -1.06001500 | 2.73749000  | C  | 2.93442200  | -1.49975900 | -1.03865700 |
| C | -2.29995300 | -2.48388300 | 3.85409800  | C  | 2.57545200  | -2.66336600 | -0.35805700 |
| H | -2.88589800 | -3.39978500 | 3.71878700  | H  | 1.55113300  | -3.01918700 | -0.42260400 |
| H | -1.44772500 | -2.73157400 | 4.49622100  | C  | 4.24314200  | -1.02073000 | -0.93912700 |
| H | -2.92694900 | -1.75741300 | 4.38149500  | H  | 4.50630400  | -0.11302000 | -1.47304600 |
| C | -0.93076000 | -2.94368200 | 1.76959400  | C  | 5.17624000  | -1.69175900 | -0.15700200 |
| H | -0.07656000 | -3.24063900 | 2.38880700  | H  | 6.18809400  | -1.30586600 | -0.06812400 |
| H | -1.50180700 | -3.84588100 | 1.51948500  | C  | 3.51722600  | -3.35514100 | 0.39636300  |
| H | -0.54587900 | -2.50895100 | 0.84024500  | H  | 3.23487600  | -4.26976600 | 0.90973800  |
| C | 0.15298200  | 4.90734400  | -0.80912100 | C  | 4.81642200  | -2.86418400 | 0.50654500  |
| H | 1.04900800  | 5.42366900  | -1.17240400 | H  | 5.54808100  | -3.39449800 | 1.10968500  |
| H | -0.70795900 | 5.29294100  | -1.36628200 | C  | 1.92899100  | -0.70034400 | -1.83874400 |
| H | 0.02065900  | 5.16514500  | 0.24757100  | C  | -0.85139500 | 2.40273900  | 2.32153500  |
| C | 0.38059900  | 3.01308700  | -2.48298000 | C  | -2.03682700 | 1.75190600  | 2.34425100  |
| H | -0.54674300 | 3.28336700  | -3.00025700 | H  | -0.48459200 | 3.24507100  | 2.88611600  |
| H | 1.20263000  | 3.54241500  | -2.97846200 | H  | -2.92879000 | 1.90593100  | 2.93041100  |
| H | 0.55040700  | 1.93956000  | -2.60817100 | O  | 2.30380200  | -0.05890700 | -2.80358300 |

|                                                            |             |             |             |   |             |             |             |
|------------------------------------------------------------|-------------|-------------|-------------|---|-------------|-------------|-------------|
| Si                                                         | -0.50106000 | -1.59852500 | -2.54072300 | C | -2.27634700 | -3.41995800 | 1.41995700  |
| C                                                          | -0.74150300 | -0.43188100 | -4.00764200 | C | 1.44792100  | -0.28110900 | 2.96640400  |
| H                                                          | -1.44594800 | 0.37122400  | -3.76666300 | H | -3.61820500 | 4.17317400  | -1.88269100 |
| H                                                          | 0.21806900  | 0.02337900  | -4.27246000 | H | -5.14497800 | 0.34041600  | -2.99584000 |
| H                                                          | -1.12481900 | -0.97434200 | -4.88124000 | H | -1.49923500 | 2.74424500  | 0.84481500  |
| C                                                          | -2.19283200 | -2.23819200 | -1.96729600 | H | -2.98265100 | -1.49861300 | -0.66130500 |
| H                                                          | -2.09343500 | -2.94650600 | -1.13763200 | H | -0.34608000 | -5.25168500 | 1.85888800  |
| H                                                          | -2.84331000 | -1.42600000 | -1.63045600 | H | 2.79448400  | -2.65093000 | 3.13291600  |
| H                                                          | -2.69525200 | -2.75712100 | -2.79516700 | H | -2.75469400 | -2.46036300 | 1.21580800  |
| C                                                          | 0.42309800  | -3.12948400 | -3.17693700 | H | 0.91950300  | 0.40935200  | 2.31388000  |
| H                                                          | -0.14754100 | -3.57967100 | -3.99977300 | C | 1.07334900  | 0.06983100  | 4.41263200  |
| H                                                          | 1.42065400  | -2.88413500 | -3.55516500 | H | 1.57024600  | -0.60538000 | 5.11909100  |
| H                                                          | 0.53597500  | -3.89320000 | -2.39905200 | H | 1.37322200  | 1.09795700  | 4.64242200  |
|                                                            |             |             |             | H | -0.00792700 | -0.01027300 | 4.57292100  |
| <b>INT3</b>                                                |             |             |             | C | 2.94029800  | -0.05942300 | 2.71586800  |
| SCF Done: E(RoB97XD) = -2616.03434930                      | A.U.        |             |             | H | 3.16861800  | 1.00767400  | 2.80706900  |
| Sum of electronic and thermal Free Energies = -2615.137539 | A.U.        |             |             | H | 3.56629300  | -0.59544900 | 3.43877700  |
| SCF Done (single point): E(RwB97XD) = -2617.71873195       | A.U.        |             |             | H | 3.22223700  | -0.38020000 | 1.70846000  |
| no imaginary frequency                                     |             |             |             | C | -5.07277900 | -1.55082100 | -0.13007700 |
| N                                                          | -2.44899200 | 0.55339700  | 0.70484500  | H | -6.03863500 | -1.23087900 | -0.53860300 |
| N                                                          | -1.21886000 | -0.76080400 | 1.87779300  | H | -5.10798900 | -2.63744900 | 0.00981400  |
| C                                                          | -1.26500000 | -0.11023700 | 0.68155400  | H | -4.95148700 | -1.09155300 | 0.85498600  |
| C                                                          | -3.08839700 | 1.16107500  | -0.44027500 | C | -4.08971500 | -1.94798900 | -2.40395700 |
| C                                                          | -2.97245200 | 2.53995500  | -0.64674700 | H | -3.94628900 | -3.01560200 | -2.21183500 |
| C                                                          | -3.68652900 | 3.10404100  | -1.70555700 | H | -5.08847400 | -1.82368300 | -2.83924300 |
| C                                                          | -4.47549600 | 2.31851900  | -2.53066800 | H | -3.34387700 | -1.64214800 | -3.14052900 |
| C                                                          | -4.54730000 | 0.94711600  | -2.32436500 | C | -3.07338700 | -4.08911800 | 2.54884800  |
| C                                                          | -3.85206300 | 0.33251600  | -1.28429300 | H | -4.12129200 | -4.21436000 | 2.25437100  |
| C                                                          | -2.11156200 | 3.41065100  | 0.24208600  | H | -2.66720800 | -5.07949100 | 2.78415800  |
| C                                                          | -3.93378000 | -1.17480600 | -1.09072900 | H | -3.04507900 | -3.49154200 | 3.46673300  |
| C                                                          | -0.34228000 | -1.88124600 | 2.13771400  | C | -2.35200500 | -4.23806000 | 0.12679000  |
| C                                                          | -0.84537800 | -3.16378600 | 1.86837700  | H | -3.40121400 | -4.40077900 | -0.14611000 |
| C                                                          | 0.01062900  | -4.24742200 | 2.06723000  | H | -1.86099400 | -3.71141100 | -0.69604900 |
| C                                                          | 1.31095000  | -4.06295700 | 2.50865700  | H | -1.88632100 | -5.22354200 | 0.23984300  |
| C                                                          | 1.77503800  | -2.78535700 | 2.78722500  | C | -1.14590400 | 4.28456800  | -0.56277700 |
| C                                                          | 0.95968700  | -1.66951500 | 2.61314800  | H | -1.67264600 | 5.02286500  | -1.17771600 |



|    |             |             |             |                                                            |             |             |             |
|----|-------------|-------------|-------------|------------------------------------------------------------|-------------|-------------|-------------|
| H  | -0.48143300 | 4.82763900  | 0.11716000  | H                                                          | 1.06285100  | 2.43548700  | -4.50649900 |
| H  | -0.52579100 | 3.66575700  | -1.21873700 | H                                                          | 0.98138000  | 3.04140900  | -2.84560100 |
| C  | -2.96318700 | 4.25070100  | 1.20060900  | H                                                          | 2.46382600  | 2.27357900  | -3.44206200 |
| H  | -3.61228600 | 3.61648700  | 1.81511900  | C                                                          | 2.04616700  | 1.52426100  | -0.52242400 |
| H  | -2.31566400 | 4.82736200  | 1.87029100  | C                                                          | 1.27731800  | 1.94428000  | 0.41293100  |
| H  | -3.60194200 | 4.95276900  | 0.65179100  | C                                                          | 1.19543400  | 2.90792300  | 1.49620600  |
| H  | 1.96949000  | -4.91734400 | 2.63050500  | C                                                          | 0.22372500  | 2.81861900  | 2.50193000  |
| H  | -5.02468200 | 2.77219100  | -3.35042800 | C                                                          | 2.11649800  | 3.96696200  | 1.54046800  |
| Pd | 0.39671200  | 0.28349300  | -0.59777200 | C                                                          | 0.15998300  | 3.76627100  | 3.51538400  |
| C  | 1.28962500  | -2.57884300 | -1.10803900 | H                                                          | -0.48547200 | 1.99654500  | 2.49053600  |
| C  | 2.51927200  | -2.15161900 | -0.60765100 | C                                                          | 2.04533600  | 4.91790300  | 2.55192400  |
| H  | 2.69341900  | -1.09117500 | -0.46826600 | H                                                          | 2.88354900  | 4.02209900  | 0.77407500  |
| C  | 1.08685500  | -3.94466000 | -1.33040600 | C                                                          | 1.06651500  | 4.82366600  | 3.53887000  |
| H  | 0.13568800  | -4.26836300 | -1.73939000 | H                                                          | -0.60048300 | 3.67971100  | 4.28578600  |
| C  | 2.08753600  | -4.86398100 | -1.04458800 | H                                                          | 2.76133000  | 5.73414500  | 2.57109900  |
| H  | 1.91878900  | -5.92245100 | -1.22197900 | H                                                          | 1.01351000  | 5.56951500  | 4.32647300  |
| C  | 3.52327200  | -3.06998600 | -0.31853100 | C                                                          | 3.40066800  | 1.68872600  | -1.03674100 |
| H  | 4.47231500  | -2.72227200 | 0.08078500  | O                                                          | 4.13696800  | 2.60714000  | -0.73658700 |
| C  | 3.30902100  | -4.42778700 | -0.53358900 | O                                                          | 3.75978700  | 0.68563800  | -1.85490200 |
| H  | 4.09262400  | -5.14621400 | -0.30877200 | C                                                          | 5.09018900  | 0.72024800  | -2.38552900 |
| C  | 0.16783300  | -1.61260500 | -1.43649500 | H                                                          | 5.02010900  | 0.17841200  | -3.33100700 |
| C  | -3.10172900 | 0.36896100  | 1.91658500  | C                                                          | 6.06324000  | 0.05257000  | -1.43137600 |
| C  | -2.32944200 | -0.45873300 | 2.65327800  | H                                                          | 7.06490100  | 0.02888400  | -1.87246900 |
| H  | -4.05298900 | 0.83280900  | 2.12285400  | H                                                          | 6.11266900  | 0.60451200  | -0.48882100 |
| H  | -2.47090100 | -0.88484100 | 3.63361800  | H                                                          | 5.74953900  | -0.97614200 | -1.22904700 |
| O  | -0.84283600 | -2.06193300 | -1.94949500 | H                                                          | 5.37009400  | 1.75827300  | -2.58007500 |
| Si | 0.66098900  | 0.54043400  | -2.99095700 |                                                            |             |             |             |
| C  | -1.14179400 | 0.62169700  | -3.52932500 | <b>TS2</b>                                                 |             |             |             |
| H  | -1.68282500 | -0.26012200 | -3.18270600 | SCF Done: E(RωB97XD) = -2616.02966757                      | A.U.        |             |             |
| H  | -1.62926800 | 1.51367100  | -3.12113500 | Sum of electronic and thermal Free Energies = -2615.132624 | A.U.        |             |             |
| H  | -1.20387600 | 0.67092900  | -4.62447000 | SCF Done (single point): E(RωB97XD) = -2617.71367806       | A.U.        |             |             |
| C  | 1.62022900  | -0.74850600 | -3.98418300 | $\nu_i = -115.95 \text{ cm}^{-1}$                          |             |             |             |
| H  | 1.07502000  | -1.69356500 | -4.06353200 | N                                                          | 1.63606000  | 1.91382500  | 0.78204700  |
| H  | 1.79871300  | -0.36683500 | -4.99741700 | N                                                          | -0.13854800 | 1.43537700  | 1.89758100  |
| H  | 2.58886900  | -0.95114700 | -3.51761200 | C                                                          | 0.49005200  | 1.18990400  | 0.71686500  |
| C  | 1.37171000  | 2.23351000  | -3.47214700 | C                                                          | 2.52242400  | 2.17032900  | -0.32862500 |

|   |             |             |             |    |             |             |             |
|---|-------------|-------------|-------------|----|-------------|-------------|-------------|
| C | 3.71958000  | 1.45278000  | -0.43352000 | H  | -0.71252200 | 4.79483300  | -2.34571600 |
| C | 4.59200800  | 1.79147000  | -1.46948800 | H  | 0.90658200  | 5.24898400  | -2.88871100 |
| C | 4.26910900  | 2.78961200  | -2.37500500 | H  | 0.27038500  | 3.61286100  | -3.20951900 |
| C | 3.06028300  | 3.46428800  | -2.26613100 | C  | -2.20807900 | 4.63583100  | 2.46523700  |
| C | 2.15727000  | 3.17409600  | -1.24471700 | H  | -1.80413800 | 5.60589800  | 2.15492000  |
| C | 4.07740900  | 0.35008100  | 0.54066000  | H  | -3.27583400 | 4.76543500  | 2.67578300  |
| C | 0.84660300  | 3.93859900  | -1.13266000 | H  | -1.71643300 | 4.34437100  | 3.39984700  |
| C | -1.54048500 | 1.17757700  | 2.12832700  | C  | -2.64954600 | 4.01430100  | 0.05124300  |
| C | -2.43685900 | 2.21685100  | 1.83907700  | H  | -2.31976200 | 5.02407800  | -0.21993200 |
| C | -3.79566500 | 1.97156200  | 2.04255200  | H  | -2.37569600 | 3.33821300  | -0.76237700 |
| C | -4.23777500 | 0.74909500  | 2.52210500  | H  | -3.74172700 | 4.03519300  | 0.13414600  |
| C | -3.32599600 | -0.25907500 | 2.80613900  | C  | 4.57347900  | -0.91610800 | -0.16370500 |
| C | -1.96119200 | -0.07262000 | 2.60398400  | H  | 5.53272100  | -0.75648400 | -0.66903300 |
| C | -1.98347400 | 3.58967500  | 1.36412500  | H  | 4.71267100  | -1.71699000 | 0.56966600  |
| C | -0.96252500 | -1.17356800 | 2.89833100  | H  | 3.84421000  | -1.25924600 | -0.90469500 |
| H | 5.53335300  | 1.25985000  | -1.56846000 | C  | 5.09062700  | 0.83400900  | 1.58513800  |
| H | 2.81075600  | 4.22672900  | -2.99551600 | H  | 4.72235800  | 1.71529300  | 2.12175500  |
| H | 3.16335400  | 0.07900100  | 1.06682900  | H  | 5.28164600  | 0.04255300  | 2.31849200  |
| H | 0.09773700  | 3.24545900  | -0.74240400 | H  | 6.04377900  | 1.10224900  | 1.11447200  |
| H | -4.51713600 | 2.75045200  | 1.81457200  | H  | -5.29987900 | 0.57434500  | 2.66297700  |
| H | -3.68625500 | -1.21677100 | 3.16742700  | H  | 4.95767700  | 3.03875700  | -3.17704100 |
| H | -0.90910200 | 3.55374700  | 1.17331900  | Pd | 0.05406100  | -0.34787400 | -0.58771600 |
| H | -0.13561500 | -1.03440800 | 2.20391300  | C  | -2.89149800 | 0.31101800  | -1.21940800 |
| C | -0.41090600 | -1.04064500 | 4.32378900  | C  | -3.17823200 | -0.88582100 | -0.56573600 |
| H | -1.21397500 | -1.14242500 | 5.06312200  | H  | -2.35836200 | -1.52805900 | -0.26095500 |
| H | 0.33720300  | -1.81723800 | 4.51651900  | C  | -3.94870700 | 1.12164100  | -1.64553900 |
| H | 0.06629500  | -0.06573000 | 4.47592500  | H  | -3.71454100 | 2.03899300  | -2.17628600 |
| C | -1.49627800 | -2.58524100 | 2.64493500  | C  | -5.26459300 | 0.75397700  | -1.39969600 |
| H | -0.66672500 | -3.29912000 | 2.68224300  | H  | -6.07866700 | 1.39319300  | -1.73041000 |
| H | -2.23225700 | -2.89318900 | 3.39679800  | C  | -4.49591200 | -1.26211400 | -0.32465100 |
| H | -1.96045100 | -2.66385400 | 1.65659300  | H  | -4.70586100 | -2.19178800 | 0.19757500  |
| C | 0.98378800  | 5.12611900  | -0.16661600 | C  | -5.54092400 | -0.44074900 | -0.73485600 |
| H | 1.73520100  | 5.83527000  | -0.53364400 | H  | -6.57051100 | -0.73018500 | -0.54241300 |
| H | 0.02884400  | 5.65780500  | -0.08419800 | C  | -1.46328800 | 0.74207500  | -1.48811300 |
| H | 1.27677900  | 4.81156200  | 0.83927900  | C  | 1.74442800  | 2.56155500  | 2.00546400  |
| C | 0.30858100  | 4.42514800  | -2.48063000 | C  | 0.62975600  | 2.26180800  | 2.70594900  |

|    |             |             |             |                                                            |             |             |             |
|----|-------------|-------------|-------------|------------------------------------------------------------|-------------|-------------|-------------|
| H  | 2.59449700  | 3.18008300  | 2.24472200  | H                                                          | -2.35198300 | -5.36967300 | 0.11327700  |
| H  | 0.29253900  | 2.57332300  | 3.68157200  | H                                                          | -3.66607300 | -4.28209800 | -0.40377700 |
| O  | -1.29190000 | 1.74613600  | -2.16614300 | H                                                          | -1.54174700 | -5.52137200 | -2.24617600 |
| Si | 0.36321400  | -1.23142700 | -2.89954400 |                                                            |             |             |             |
| C  | 1.43603700  | 0.26821900  | -3.30503600 | <b>INT3'</b>                                               |             |             |             |
| H  | 0.91234300  | 1.19899700  | -3.07315000 | SCF Done: E(RωB97XD) = -2616.03351668                      | A.U.        |             |             |
| H  | 2.38613700  | 0.25631500  | -2.76056900 | Sum of electronic and thermal Free Energies = -2615.141504 | A.U.        |             |             |
| H  | 1.66300000  | 0.24841000  | -4.37997000 | SCF Done (single point): E(RωB97XD) = -2617.71843703       | A.U.        |             |             |
| C  | -1.23835300 | -1.22775200 | -3.89424500 | no imaginary frequency                                     |             |             |             |
| H  | -1.57162800 | -0.20194300 | -4.07513200 | N                                                          | -1.69308000 | 1.92402900  | 0.86192000  |
| H  | -1.07356900 | -1.71935300 | -4.86082600 | N                                                          | -1.54639800 | 0.07905200  | 1.93677500  |
| H  | -2.03702600 | -1.75746900 | -3.36944400 | C                                                          | -1.16920600 | 0.67690800  | 0.77604100  |
| C  | 1.39646000  | -2.70889100 | -3.48497500 | C                                                          | -1.76468700 | 2.88116200  | -0.21190900 |
| H  | 1.64289600  | -2.53496700 | -4.54085200 | C                                                          | -0.81559900 | 3.90622300  | -0.27012500 |
| H  | 2.33567600  | -2.78975200 | -2.92800400 | C                                                          | -0.97634700 | 4.88353100  | -1.25491300 |
| H  | 0.88033300  | -3.67159500 | -3.42055200 | C                                                          | -2.03437200 | 4.82534600  | -2.14856500 |
| C  | 0.38594200  | -2.40448600 | -0.81124100 | C                                                          | -2.94272700 | 3.77537100  | -2.08907100 |
| C  | 1.14698600  | -1.97639000 | 0.16400900  | C                                                          | -2.82884900 | 2.77365200  | -1.12691700 |
| C  | 1.99996200  | -2.53495400 | 1.19767600  | C                                                          | 0.34745800  | 3.97158600  | 0.69931100  |
| C  | 2.32212500  | -1.80086200 | 2.34949100  | C                                                          | -3.81393000 | 1.61295000  | -1.08931600 |
| C  | 2.57110300  | -3.80799500 | 1.03620800  | C                                                          | -1.50627900 | -1.34189400 | 2.16777800  |
| C  | 3.18368700  | -2.31622700 | 3.30872100  | C                                                          | -2.63111500 | -2.08886300 | 1.78201500  |
| H  | 1.89479700  | -0.81232200 | 2.48648300  | C                                                          | -2.59790200 | -3.46436800 | 2.01050300  |
| C  | 3.44717800  | -4.31503200 | 1.98868100  | C                                                          | -1.50093200 | -4.06191200 | 2.61391800  |
| H  | 2.30964500  | -4.38878000 | 0.15896500  | C                                                          | -0.41253000 | -3.29375400 | 3.00493200  |
| C  | 3.75801300  | -3.57281800 | 3.12572800  | C                                                          | -0.38845100 | -1.91681300 | 2.78484700  |
| H  | 3.41561400  | -1.73212000 | 4.19470200  | C                                                          | -3.88859400 | -1.44033900 | 1.22226900  |
| H  | 3.88757300  | -5.29706500 | 1.84351900  | C                                                          | 0.77574100  | -1.06415800 | 3.24492400  |
| H  | 4.44430400  | -3.97107800 | 3.86742900  | H                                                          | -0.26034200 | 5.69751900  | -1.31997600 |
| C  | -0.26047100 | -3.69356500 | -1.08075700 | H                                                          | -3.74446300 | 3.72836600  | -2.81793300 |
| O  | 0.19193100  | -4.77790700 | -0.77569000 | H                                                          | 0.38880400  | 3.02746000  | 1.24494100  |
| O  | -1.45050800 | -3.53358300 | -1.68716100 | H                                                          | -3.25573200 | 0.72940100  | -0.76936600 |
| C  | -2.21571300 | -4.71796800 | -1.93910400 | H                                                          | -3.44573500 | -4.07497500 | 1.71505800  |
| H  | -2.86634200 | -4.44790600 | -2.77332400 | H                                                          | 0.43657600  | -3.77254400 | 3.48284800  |
| C  | -3.01951100 | -5.10913500 | -0.71231700 | H                                                          | -3.66497500 | -0.39628000 | 0.99416000  |
| H  | -3.64911600 | -5.97632100 | -0.93661800 | H                                                          | 0.74893100  | -0.13047600 | 2.68334700  |

|    |             |             |             |    |             |             |             |
|----|-------------|-------------|-------------|----|-------------|-------------|-------------|
| C  | 0.61435400  | -0.69470900 | 4.72606600  | C  | 0.07565400  | -3.21955600 | -0.43811300 |
| H  | 0.65157700  | -1.58699100 | 5.36303500  | H  | 0.68553100  | -2.54236300 | 0.15144700  |
| H  | 1.41425500  | -0.01232800 | 5.03142300  | C  | -1.64516400 | -3.58438300 | -2.08027300 |
| H  | -0.34191200 | -0.19154600 | 4.90481600  | H  | -2.36521300 | -3.17024700 | -2.77920000 |
| C  | 2.13941600  | -1.71324600 | 2.99193900  | C  | -1.50915700 | -4.95722100 | -1.92128100 |
| H  | 2.93409700  | -0.99705200 | 3.22750900  | H  | -2.12480700 | -5.63436500 | -2.50663800 |
| H  | 2.30107100  | -2.59620900 | 3.62122800  | C  | 0.20906600  | -4.59361700 | -0.26975600 |
| H  | 2.25731800  | -2.00865000 | 1.94471500  | H  | 0.92552700  | -4.97885700 | 0.44969400  |
| C  | -4.95643700 | 1.86879700  | -0.09409600 | C  | -0.57991100 | -5.46492400 | -1.01388900 |
| H  | -5.52685500 | 2.75946500  | -0.38381800 | H  | -0.47163500 | -6.53863400 | -0.88826300 |
| H  | -5.64397400 | 1.01477800  | -0.08560000 | C  | -1.02551300 | -1.21167900 | -1.56393800 |
| H  | -4.59376400 | 2.01301700  | 0.92696700  | C  | -2.33779300 | 2.11861700  | 2.07521800  |
| C  | -4.39875900 | 1.26485700  | -2.46121800 | C  | -2.24801600 | 0.95454700  | 2.75112300  |
| H  | -4.92331100 | 0.30686200  | -2.39186700 | H  | -2.80153200 | 3.05935200  | 2.32475100  |
| H  | -5.12217100 | 2.01547100  | -2.80210600 | H  | -2.62373500 | 0.65546000  | 3.71627100  |
| H  | -3.61729000 | 1.15736100  | -3.21680500 | O  | -2.02325500 | -0.84653800 | -2.16439900 |
| C  | -4.99179200 | -1.44076500 | 2.29133200  | Si | 0.85854500  | 0.25189100  | -2.91747200 |
| H  | -5.87644300 | -0.90812600 | 1.92524900  | C  | -0.39895800 | 1.57499700  | -3.37434800 |
| H  | -5.29169400 | -2.46415500 | 2.54495700  | H  | -1.41030100 | 1.23124700  | -3.15085200 |
| H  | -4.65604900 | -0.95269000 | 3.21257700  | H  | -0.21669600 | 2.50433300  | -2.82429700 |
| C  | -4.38369800 | -2.08087700 | -0.07808700 | H  | -0.32775000 | 1.79428600  | -4.44791400 |
| H  | -5.30078600 | -1.57715200 | -0.40571600 | C  | 0.74796900  | -1.19517900 | -4.12925200 |
| H  | -3.64275900 | -1.98101700 | -0.87409700 | H  | -0.25769600 | -1.62130100 | -4.17796200 |
| H  | -4.61917600 | -3.14311800 | 0.05102100  | H  | 1.01018000  | -0.82457600 | -5.12878100 |
| C  | 1.68308400  | 4.12807900  | -0.03566800 | H  | 1.45100200  | -1.99681300 | -3.88267300 |
| H  | 1.75130600  | 5.08398100  | -0.56730600 | C  | 2.56175300  | 1.03753900  | -3.19252600 |
| H  | 2.51084200  | 4.09453400  | 0.68050000  | H  | 2.55200000  | 1.52078300  | -4.17830700 |
| H  | 1.82506700  | 3.32051600  | -0.76110400 | H  | 2.78637700  | 1.80366500  | -2.44352500 |
| C  | 0.14834100  | 5.08739400  | 1.73245200  | H  | 3.37385600  | 0.30546100  | -3.18389400 |
| H  | -0.79645100 | 4.96151600  | 2.27212400  | C  | 2.42054500  | -0.23799900 | -0.38209600 |
| H  | 0.96121000  | 5.06973300  | 2.46612600  | C  | 2.06824100  | 0.65036700  | 0.46749700  |
| H  | 0.13396800  | 6.07477600  | 1.25537600  | C  | 3.48019300  | -1.08751600 | -0.89166300 |
| H  | -1.49333500 | -5.13526400 | 2.77905000  | C  | 4.81669400  | -0.74143400 | -0.64381300 |
| H  | -2.14543500 | 5.59331900  | -2.90852500 | C  | 3.19518200  | -2.25883700 | -1.60088100 |
| Pd | 0.35263200  | -0.01448800 | -0.57429500 | C  | 5.84307600  | -1.55625200 | -1.10435400 |
| C  | -0.84984900 | -2.70118700 | -1.34270400 | H  | 5.02879700  | 0.17051200  | -0.09547600 |

|                                                            |             |             |             |   |             |             |             |
|------------------------------------------------------------|-------------|-------------|-------------|---|-------------|-------------|-------------|
| C                                                          | 4.22558400  | -3.07150100 | -2.05698100 | C | -2.75044700 | 3.99482600  | -1.44910600 |
| H                                                          | 2.15980200  | -2.52412200 | -1.78522500 | C | -1.60462400 | 3.59735100  | -2.12174100 |
| C                                                          | 5.55095000  | -2.72135300 | -1.81163200 | C | -1.28216700 | 2.24744400  | -2.25906500 |
| H                                                          | 6.87640900  | -1.28151400 | -0.91386600 | C | -4.34813400 | 0.65437600  | -0.53397000 |
| H                                                          | 3.99188400  | -3.97965000 | -2.60446000 | C | -0.05444600 | 1.82803500  | -3.04643000 |
| H                                                          | 6.35620100  | -3.35522200 | -2.17133800 | H | 1.23101700  | -5.70423800 | -0.11563100 |
| C                                                          | 2.57418100  | 1.44090600  | 1.57457100  | H | -2.16793300 | -4.93557200 | 2.35568400  |
| O                                                          | 1.93964600  | 1.82791400  | 2.53674500  | H | 0.87822500  | -2.47579700 | -1.95238600 |
| O                                                          | 3.88456000  | 1.72509400  | 1.41817900  | H | -2.76637700 | -1.59524000 | 0.94513400  |
| C                                                          | 4.48216200  | 2.50340900  | 2.46194200  | H | -4.51260400 | 3.37171400  | -0.40495700 |
| H                                                          | 3.95809900  | 3.46196000  | 2.53834200  | H | -0.94116900 | 4.34976800  | -2.53742100 |
| H                                                          | 4.35488300  | 1.98164000  | 3.41550400  | H | -3.84408600 | -0.31306000 | -0.47041000 |
| C                                                          | 5.94196100  | 2.68582500  | 2.10487900  | H | 0.08167700  | 0.75415300  | -2.89634000 |
| H                                                          | 6.04457900  | 3.20216300  | 1.14603800  | C | -0.28936200 | 2.05762200  | -4.54650800 |
| H                                                          | 6.44331300  | 3.28009900  | 2.87493700  | H | -0.42530300 | 3.12340300  | -4.76350400 |
| H                                                          | 6.44636300  | 1.71751900  | 2.03294800  | H | 0.56842400  | 1.70057300  | -5.12732600 |
|                                                            |             |             |             | H | -1.18387700 | 1.52922400  | -4.89402900 |
| <b>INT4'</b>                                               |             |             |             | C | 1.22680500  | 2.52289400  | -2.57410900 |
| SCF Done: E(RωB97XD) = -2616.04645032                      | A.U.        |             |             | H | 2.07428700  | 2.20560100  | -3.19053400 |
| Sum of electronic and thermal Free Energies = -2615.153374 | A.U.        |             |             | H | 1.14773300  | 3.61321500  | -2.65365700 |
| SCF Done (single point): E(RωB97XD) = -2617.72811859       | A.U.        |             |             | H | 1.46387100  | 2.26420500  | -1.53891400 |
| no imaginary frequency                                     |             |             |             | C | -4.29854700 | -2.99197300 | 0.36001300  |
| N                                                          | -1.39466800 | -2.08351100 | -1.14187000 | H | -4.59654700 | -4.02881400 | 0.55553600  |
| N                                                          | -1.86240400 | -0.08928000 | -1.78379700 | H | -5.13046800 | -2.33894000 | 0.64846400  |
| C                                                          | -1.17257900 | -0.77992900 | -0.83738700 | H | -4.14478000 | -2.87862200 | -0.71727300 |
| C                                                          | -1.03101600 | -3.20300000 | -0.31318100 | C | -3.35189200 | -2.65811200 | 2.66488300  |
| C                                                          | 0.10550400  | -3.95012600 | -0.64285400 | H | -4.06859900 | -1.86456800 | 2.89653300  |
| C                                                          | 0.36421800  | -5.09346000 | 0.11526600  | H | -3.79739000 | -3.61014400 | 2.97787300  |
| C                                                          | -0.46333900 | -5.45287000 | 1.16868600  | H | -2.45382300 | -2.47621400 | 3.26085700  |
| C                                                          | -1.55414800 | -4.66136900 | 1.50443500  | C | -5.49822700 | 0.51188700  | -1.54324600 |
| C                                                          | -1.86128000 | -3.51167500 | 0.77827600  | H | -6.18912300 | -0.27703100 | -1.22614600 |
| C                                                          | 1.03269000  | -3.54348700 | -1.77462900 | H | -6.06211300 | 1.44877700  | -1.62075900 |
| C                                                          | -3.04125600 | -2.63044400 | 1.16606300  | H | -5.13157200 | 0.26173800  | -2.54397500 |
| C                                                          | -2.16162900 | 1.31551700  | -1.69892200 | C | -4.89604800 | 0.95345600  | 0.86431000  |
| C                                                          | -3.34631800 | 1.68368600  | -1.03873500 | H | -5.59015300 | 0.15811600  | 1.15940000  |
| C                                                          | -3.61580800 | 3.04619800  | -0.92223800 | H | -4.09091100 | 0.98793600  | 1.60072400  |

|    |             |             |             |                                                               |             |             |             |
|----|-------------|-------------|-------------|---------------------------------------------------------------|-------------|-------------|-------------|
| H  | -5.45232100 | 1.89689800  | 0.89726700  | H                                                             | 1.21374700  | -0.02902700 | 5.27567400  |
| C  | 2.50881100  | -3.72831500 | -1.40689100 | H                                                             | 1.89910900  | 1.32371700  | 4.35609800  |
| H  | 2.78312800  | -4.78734900 | -1.34126100 | C                                                             | 3.57108400  | -1.48632100 | 3.55162500  |
| H  | 3.14457200  | -3.26795900 | -2.16964300 | H                                                             | 3.47816300  | -1.99443800 | 4.51913600  |
| H  | 2.73230700  | -3.25005600 | -0.44894900 | H                                                             | 3.93072200  | -2.21921800 | 2.81944500  |
| C  | 0.69908800  | -4.29981400 | -3.06805300 | H                                                             | 4.31955800  | -0.69453000 | 3.64620100  |
| H  | -0.33218800 | -4.12070300 | -3.38901900 | C                                                             | 2.26320200  | 0.14638400  | 1.36300900  |
| H  | 1.36581300  | -3.98124600 | -3.87701200 | C                                                             | 2.14144900  | -0.43884300 | 0.11260100  |
| H  | 0.82576900  | -5.37976500 | -2.92863600 | C                                                             | 3.12336100  | -0.38669800 | -0.95807600 |
| H  | -2.96801900 | 5.05138200  | -1.32824500 | C                                                             | 2.72315700  | -0.43101600 | -2.30057100 |
| H  | -0.24531900 | -6.34596600 | 1.74698000  | C                                                             | 4.49957400  | -0.39964700 | -0.67386900 |
| Pd | 0.18358500  | -0.09703600 | 0.49486000  | C                                                             | 3.65713400  | -0.43208700 | -3.32705300 |
| C  | -1.18023000 | 2.46982000  | 1.57048900  | H                                                             | 1.66112800  | -0.46347500 | -2.51931300 |
| C  | -0.17933000 | 3.18168700  | 0.91325900  | C                                                             | 5.43672200  | -0.43182700 | -1.69813200 |
| H  | 0.58551000  | 2.63959400  | 0.36861100  | H                                                             | 4.82528800  | -0.39656200 | 0.36309000  |
| C  | -2.15507800 | 3.16405400  | 2.29486300  | C                                                             | 5.01930200  | -0.43647700 | -3.02804500 |
| H  | -2.91719500 | 2.59805600  | 2.82097500  | H                                                             | 3.32563200  | -0.44789400 | -4.36160300 |
| C  | -2.13667000 | 4.55121800  | 2.34128300  | H                                                             | 6.49653000  | -0.44764400 | -1.46116300 |
| H  | -2.89856000 | 5.08694700  | 2.90061200  | H                                                             | 5.75319500  | -0.45641500 | -3.82830600 |
| C  | -0.14908300 | 4.57151400  | 0.97267300  | C                                                             | 3.08762100  | 1.37929400  | 1.53123000  |
| H  | 0.63926900  | 5.11696800  | 0.46127600  | O                                                             | 3.78879900  | 1.64997000  | 2.48535400  |
| C  | -1.13142700 | 5.25749300  | 1.67933900  | O                                                             | 2.93857100  | 2.21832000  | 0.48137100  |
| H  | -1.11220500 | 6.34308700  | 1.72404500  | C                                                             | 3.72416400  | 3.41250900  | 0.47308800  |
| C  | -1.21008800 | 0.96522600  | 1.52435000  | H                                                             | 3.15105400  | 4.10817200  | -0.14555000 |
| C  | -2.17978400 | -2.20386900 | -2.27860300 | C                                                             | 5.09707800  | 3.15225900  | -0.12026700 |
| C  | -2.46946200 | -0.95003600 | -2.68516300 | H                                                             | 5.64867300  | 4.09330500  | -0.21727500 |
| H  | -2.46281800 | -3.16674300 | -2.67211900 | H                                                             | 5.66954100  | 2.48114700  | 0.52593400  |
| H  | -3.05301500 | -0.58342300 | -3.51384000 | H                                                             | 5.00513600  | 2.69245800  | -1.10887400 |
| O  | -1.98544900 | 0.35649300  | 2.24555000  | H                                                             | 3.79430900  | 3.80615500  | 1.48987200  |
| Si | 1.91229500  | -0.77023400 | 3.00824900  |                                                               |             |             |             |
| C  | 0.69581200  | -2.19059100 | 2.80673500  | <b>INT4</b>                                                   |             |             |             |
| H  | -0.32621000 | -1.82482600 | 2.66416800  | SCF Done: E(R $\omega$ B97XD) = -2616.06893906                | A.U.        |             |             |
| H  | 0.94512100  | -2.84563100 | 1.96573400  | Sum of electronic and thermal Free Energies = -2615.173144    | A.U.        |             |             |
| H  | 0.70874700  | -2.79841500 | 3.72100300  | SCF Done (single point): E(R $\omega$ B97XD) = -2617.74884640 | A.U.        |             |             |
| C  | 1.25594200  | 0.44151100  | 4.28614000  | no imaginary frequency                                        |             |             |             |
| H  | 0.24273000  | 0.76575400  | 4.02552000  | N                                                             | -1.13531500 | 1.38907300  | -2.10048000 |

|   |             |             |             |    |             |             |             |
|---|-------------|-------------|-------------|----|-------------|-------------|-------------|
| N | -2.78320000 | 0.24185700  | -1.37237000 | H  | 0.32140700  | -0.65520100 | -5.52603000 |
| C | -1.47225800 | 0.49116500  | -1.13828900 | H  | -0.54413900 | 0.80835000  | -5.03083600 |
| C | 0.13449100  | 2.06133700  | -2.16573700 | C  | 2.34133300  | -0.60809700 | -3.66939200 |
| C | 0.27733200  | 3.25961600  | -1.45014000 | H  | 2.16560400  | -1.62289900 | -4.04082400 |
| C | 1.45935900  | 3.97778900  | -1.62904800 | H  | 3.06837000  | -0.14574200 | -4.34632400 |
| C | 2.46092100  | 3.50583900  | -2.46511600 | H  | 2.79694500  | -0.68056400 | -2.67562400 |
| C | 2.32241600  | 2.27821300  | -3.10062400 | C  | -3.48857900 | -2.48519300 | -3.14568300 |
| C | 1.16004800  | 1.51981300  | -2.95748000 | H  | -2.87239200 | -2.96523800 | -3.91367800 |
| C | -0.76652000 | 3.74479200  | -0.45814500 | H  | -4.47195200 | -2.96970000 | -3.14706400 |
| C | 1.01867200  | 0.16729600  | -3.63779900 | H  | -3.62471300 | -1.43880000 | -3.43353800 |
| C | -3.63510300 | -0.55348000 | -0.52877300 | C  | -2.54097200 | -4.10350200 | -1.47652100 |
| C | -3.65408300 | -1.94570300 | -0.69381400 | H  | -1.82596500 | -4.48749500 | -2.21044900 |
| C | -4.49871400 | -2.67145700 | 0.14595800  | H  | -2.10762300 | -4.23489800 | -0.48194200 |
| C | -5.28516500 | -2.03409100 | 1.09724500  | H  | -3.44999900 | -4.71174000 | -1.55659000 |
| C | -5.25073200 | -0.65326800 | 1.22821300  | C  | -0.18932400 | 3.71048300  | 0.96424400  |
| C | -4.42770000 | 0.12152500  | 0.41083700  | H  | 0.64233100  | 4.41451300  | 1.07716800  |
| C | -2.82057600 | -2.62775700 | -1.76809500 | H  | -0.96193300 | 3.97342000  | 1.69458800  |
| C | -4.37362600 | 1.63415600  | 0.57254500  | H  | 0.19187900  | 2.71293000  | 1.20443400  |
| H | 1.60216900  | 4.91113400  | -1.09244200 | C  | -1.30943500 | 5.13164600  | -0.81940300 |
| H | 3.13716500  | 1.89950300  | -3.70775500 | H  | -1.75048800 | 5.13649500  | -1.82193100 |
| H | -1.61109600 | 3.05007100  | -0.47758100 | H  | -2.08336500 | 5.43052700  | -0.10409900 |
| H | 0.30916100  | -0.42594900 | -3.04911900 | H  | -0.52222400 | 5.89328800  | -0.79353300 |
| H | -4.53813300 | -3.75150500 | 0.06195300  | H  | -5.92989900 | -2.62254300 | 1.74370600  |
| H | -5.86619100 | -0.17276800 | 1.98161100  | H  | 3.37438100  | 4.07855300  | -2.59525900 |
| H | -1.85238600 | -2.11736300 | -1.80611000 | Pd | 0.10660500  | -0.22323900 | 0.04696000  |
| H | -4.02228800 | 2.06811800  | -0.36929600 | C  | -1.32138900 | -0.81073800 | 2.57973500  |
| C | -5.74631100 | 2.25429800  | 0.85640700  | C  | -0.76997600 | 0.34266300  | 3.13491200  |
| H | -6.11015000 | 2.00197900  | 1.85837500  | H  | 0.07024400  | 0.82107800  | 2.64499200  |
| H | -5.67460600 | 3.34583900  | 0.80511400  | C  | -2.41759900 | -1.42176400 | 3.19423600  |
| H | -6.49591600 | 1.92505200  | 0.12932800  | H  | -2.84058900 | -2.31341000 | 2.74405700  |
| C | -3.36018900 | 2.01941300  | 1.65584400  | C  | -2.95864100 | -0.87534600 | 4.35155600  |
| H | -3.32163300 | 3.10896900  | 1.77437200  | H  | -3.82042500 | -1.34326400 | 4.81867400  |
| H | -3.63119000 | 1.57588700  | 2.62000800  | C  | -1.29269100 | 0.87145700  | 4.30965100  |
| H | -2.35767600 | 1.66535400  | 1.40176800  | H  | -0.84725200 | 1.76153300  | 4.74383500  |
| C | 0.43793700  | 0.32453600  | -5.05054200 | C  | -2.39092200 | 0.26626400  | 4.91623500  |
| H | 1.10283800  | 0.93096200  | -5.67659600 | H  | -2.80815200 | 0.68582200  | 5.82738500  |

|    |             |             |             |                                                            |             |             |             |
|----|-------------|-------------|-------------|------------------------------------------------------------|-------------|-------------|-------------|
| C  | -0.78479300 | -1.43013000 | 1.32129100  | H                                                          | 6.50166200  | -1.55203500 | 2.64131000  |
| C  | -2.21245800 | 1.70091600  | -2.91301800 | C                                                          | 6.27903100  | 0.47737200  | 1.90285500  |
| C  | -3.25291200 | 0.97240000  | -2.45482000 | H                                                          | 7.32095500  | 0.75595900  | 2.09465600  |
| H  | -2.13243200 | 2.41008600  | -3.72122400 | H                                                          | 5.94281600  | 0.98254300  | 0.99419100  |
| H  | -4.27956500 | 0.90680900  | -2.77822200 | H                                                          | 5.66038400  | 0.82314300  | 2.73580800  |
| O  | -1.00759500 | -2.58748200 | 1.05820900  | H                                                          | 6.74223400  | -1.38056100 | 0.88287800  |
| Si | 2.36374100  | -3.28714200 | -0.38290800 |                                                            |             |             |             |
| C  | 0.88329700  | -3.26227300 | -1.53897000 | <b>TS3</b>                                                 |             |             |             |
| H  | 0.99638300  | -2.53480700 | -2.34674400 | SCF Done: E(RoB97XD) = -2616.05519466                      | A.U.        |             |             |
| H  | 0.74313400  | -4.25423700 | -1.98661100 | Sum of electronic and thermal Free Energies = -2615.160201 | A.U.        |             |             |
| H  | -0.01103000 | -3.01687700 | -0.96124900 | SCF Done (single point): E(RoB97XD) = -2617.73295508       | A.U.        |             |             |
| C  | 1.98382500  | -4.42340000 | 1.07029500  | $v_i = -240.28 \text{ cm}^{-1}$                            |             |             |             |
| H  | 1.07671600  | -4.08117000 | 1.57882000  | N                                                          | 1.95600100  | 2.39073300  | -0.20310300 |
| H  | 1.82010000  | -5.45511700 | 0.73668700  | N                                                          | 3.02314100  | 0.68677800  | 0.52370300  |
| H  | 2.80480300  | -4.42519900 | 1.79569700  | C                                                          | 1.78806100  | 1.08617800  | 0.13215500  |
| C  | 3.87487800  | -3.93210200 | -1.31185400 | C                                                          | 0.90039900  | 3.14790600  | -0.81402000 |
| H  | 3.66138500  | -4.91126900 | -1.75631800 | C                                                          | 0.70732700  | 3.00696300  | -2.19594300 |
| H  | 4.16933600  | -3.24478000 | -2.11155300 | C                                                          | -0.33568800 | 3.73097600  | -2.77521500 |
| H  | 4.73928100  | -4.04792800 | -0.64823900 | C                                                          | -1.15661600 | 4.54122800  | -2.00370300 |
| C  | 2.80735000  | -1.58414900 | 0.30964600  | C                                                          | -0.95689600 | 4.63957700  | -0.63255900 |
| C  | 1.97569200  | -0.61846400 | 0.75418400  | C                                                          | 0.07190300  | 3.93838200  | -0.00453500 |
| C  | 2.51663100  | 0.62955400  | 1.36144300  | C                                                          | 1.58676000  | 2.11441900  | -3.05780400 |
| C  | 2.57123000  | 0.80078800  | 2.75210400  | C                                                          | 0.28920400  | 4.03428500  | 1.49619200  |
| C  | 2.95065200  | 1.68206800  | 0.54574700  | C                                                          | 3.33350900  | -0.69596100 | 0.76835200  |
| C  | 3.02304700  | 1.99349900  | 3.30418500  | C                                                          | 3.03429000  | -1.25824000 | 2.01949900  |
| H  | 2.25777500  | -0.01613900 | 3.39584000  | C                                                          | 3.25073400  | -2.62680300 | 2.16457000  |
| C  | 3.40913900  | 2.87355400  | 1.10020200  | C                                                          | 3.73387500  | -3.39580300 | 1.11199200  |
| H  | 2.93379100  | 1.55398400  | -0.53243300 | C                                                          | 4.03866200  | -2.80647600 | -0.10381800 |
| C  | 3.44136500  | 3.03926000  | 2.48079500  | C                                                          | 3.85129900  | -1.43743800 | -0.30015600 |
| H  | 3.05946900  | 2.10586700  | 4.38457000  | C                                                          | 2.51249700  | -0.40242900 | 3.16474000  |
| H  | 3.74007000  | 3.67375000  | 0.44359500  | C                                                          | 4.19574600  | -0.80878100 | -1.64278300 |
| H  | 3.79757100  | 3.96880800  | 2.91524700  | H                                                          | -0.51180800 | 3.65277700  | -3.84395500 |
| C  | 4.27472400  | -1.29131600 | 0.35375500  | H                                                          | -1.62258700 | 5.25917200  | -0.04135200 |
| O  | 4.92953600  | -0.97041600 | -0.61704600 | H                                                          | 2.22480900  | 1.51974400  | -2.39842900 |
| O  | 4.79707700  | -1.42620400 | 1.58587500  | H                                                          | 0.78246400  | 3.11074600  | 1.81841800  |
| C  | 6.16668200  | -1.02879200 | 1.74292900  | H                                                          | 3.01534800  | -3.11108800 | 3.10508500  |



|   |             |             |             |    |             |             |             |
|---|-------------|-------------|-------------|----|-------------|-------------|-------------|
| H | 4.40839100  | -3.41984700 | -0.92029700 | H  | -1.96888700 | 5.08980100  | -2.47093900 |
| H | 1.74381600  | 0.26071400  | 2.75210100  | Pd | -0.05029200 | 0.13664200  | 0.10156500  |
| H | 4.08612700  | 0.27584200  | -1.55741200 | C  | 0.10802300  | -2.85624900 | 0.14546600  |
| C | 5.65571100  | -1.07969500 | -2.02849200 | C  | 0.43292000  | -2.78167600 | -1.20744700 |
| H | 5.83733200  | -2.14713400 | -2.19477200 | H  | 0.29092100  | -1.84395500 | -1.73528600 |
| H | 5.90559900  | -0.55321800 | -2.95618500 | C  | 0.27545300  | -4.06639300 | 0.82464600  |
| H | 6.34289000  | -0.74159400 | -1.24573900 | H  | 0.02417100  | -4.10679100 | 1.87951600  |
| C | 3.23369900  | -1.26758700 | -2.74205700 | C  | 0.76176400  | -5.18355800 | 0.15860800  |
| H | 3.48819900  | -0.78774700 | -3.69439900 | H  | 0.88982100  | -6.12107600 | 0.69219200  |
| H | 3.27813800  | -2.35306300 | -2.88288100 | C  | 0.92088400  | -3.89875300 | -1.87609300 |
| H | 2.20485600  | -1.00148600 | -2.48565600 | H  | 1.16151700  | -3.82938600 | -2.93274500 |
| C | 1.22025300  | 5.20852100  | 1.83367100  | C  | 1.08637400  | -5.10074200 | -1.19478800 |
| H | 0.78016400  | 6.15603400  | 1.50174800  | H  | 1.46375000  | -5.97533000 | -1.71746300 |
| H | 1.38494300  | 5.26910300  | 2.91485700  | C  | -0.39761400 | -1.67376100 | 0.92641900  |
| H | 2.19591200  | 5.10163900  | 1.34867900  | C  | 3.26991400  | 2.79707700  | -0.03728700 |
| C | -1.02383000 | 4.14386400  | 2.27738800  | C  | 3.94342500  | 1.71982400  | 0.42705300  |
| H | -0.82801400 | 4.02778600  | 3.34778000  | H  | 3.59577100  | 3.79865500  | -0.26788800 |
| H | -1.50316500 | 5.11932300  | 2.13714800  | H  | 4.98270100  | 1.58171300  | 0.67985400  |
| H | -1.73162500 | 3.36584300  | 1.97688500  | O  | -0.56015700 | -1.76289200 | 2.12909000  |
| C | 3.63649800  | 0.46770300  | 3.75084000  | Si | -2.75741000 | 0.15258200  | 2.79012000  |
| H | 3.24894600  | 1.08270300  | 4.57041700  | C  | -1.12179300 | 0.86120900  | 3.40234300  |
| H | 4.44061900  | -0.16202200 | 4.14928200  | H  | -0.52414700 | 1.24865800  | 2.56977200  |
| H | 4.06973700  | 1.14200600  | 3.00654700  | H  | -1.29763000 | 1.67509400  | 4.11471200  |
| C | 1.85073900  | -1.21340500 | 4.27985800  | H  | -0.53672100 | 0.07773000  | 3.88650500  |
| H | 1.41068900  | -0.52924800 | 5.01277000  | C  | -3.26588200 | -1.39021900 | 3.74359900  |
| H | 1.05359600  | -1.84809400 | 3.88372800  | H  | -2.51006400 | -2.17288900 | 3.64095400  |
| H | 2.57701900  | -1.83578700 | 4.81670800  | H  | -3.39358500 | -1.16293000 | 4.80871600  |
| C | 0.75623500  | 1.12231000  | -3.87906600 | H  | -4.21797100 | -1.77654600 | 3.36304700  |
| H | 0.09188200  | 1.63130300  | -4.58616800 | C  | -4.08934800 | 1.46463900  | 3.08328500  |
| H | 1.41571900  | 0.46858000  | -4.45938200 | H  | -4.05220200 | 1.79845900  | 4.12746200  |
| H | 0.13793500  | 0.49667500  | -3.22750300 | H  | -3.95189100 | 2.33928000  | 2.43903500  |
| C | 2.50528100  | 2.95932400  | -3.95040900 | H  | -5.09671700 | 1.07886100  | 2.89280500  |
| H | 3.13576300  | 3.62422400  | -3.35011900 | C  | -2.88134000 | -0.25514900 | 0.92717400  |
| H | 3.15933400  | 2.31309900  | -4.54633800 | C  | -1.96733600 | -0.68664200 | 0.03468900  |
| H | 1.92328100  | 3.58061600  | -4.64086700 | C  | -2.34991100 | -1.04522700 | -1.35957200 |
| H | 3.86415600  | -4.46551700 | 1.24255800  | C  | -2.64808200 | -2.36684700 | -1.70813000 |

|                                                            |             |             |             |   |             |             |             |
|------------------------------------------------------------|-------------|-------------|-------------|---|-------------|-------------|-------------|
| C                                                          | -2.41685200 | -0.05769200 | -2.35114900 | C | 1.60674700  | 2.86175300  | -0.29794500 |
| C                                                          | -2.97979100 | -2.69679800 | -3.01803600 | C | 2.12858300  | 2.87835200  | 1.00278100  |
| H                                                          | -2.61519200 | -3.13657200 | -0.94382400 | C | 3.51583000  | 2.95290400  | 1.12963200  |
| C                                                          | -2.75844800 | -0.38792600 | -3.65862200 | C | 4.33357300  | 3.01518800  | 0.01010900  |
| H                                                          | -2.20238600 | 0.97456000  | -2.08672500 | C | 3.78870900  | 2.94827600  | -1.26516700 |
| C                                                          | -3.03424100 | -1.71018000 | -3.99900600 | C | 2.41056900  | 2.84799400  | -1.44754500 |
| H                                                          | -3.19969000 | -3.73033700 | -3.27048000 | C | 1.21576500  | 2.84683400  | 2.21924300  |
| H                                                          | -2.80726100 | 0.39164100  | -4.41367800 | C | 1.80949600  | 2.62748700  | -2.82872800 |
| H                                                          | -3.29388800 | -1.96813600 | -5.02164900 | H | -4.49392200 | -0.88142100 | -2.75768900 |
| C                                                          | -4.26266800 | -0.04430100 | 0.38241400  | H | -5.88336700 | 0.86054400  | 0.88798600  |
| O                                                          | -4.68786900 | 1.02067100  | -0.00690300 | H | -1.15165100 | 0.64731400  | -2.51584700 |
| O                                                          | -4.98275900 | -1.17975200 | 0.38624600  | H | -2.68527100 | 2.71999200  | 1.46845500  |
| C                                                          | -6.27815400 | -1.10643800 | -0.23122500 | H | 3.96690500  | 2.95616200  | 2.11548500  |
| H                                                          | -6.83730500 | -1.93458400 | 0.20942000  | H | 4.44893700  | 2.95263700  | -2.12678600 |
| C                                                          | -6.16603000 | -1.24720400 | -1.73887500 | H | 0.34891900  | 2.23112900  | 1.95958300  |
| H                                                          | -7.16287800 | -1.21858600 | -2.19185600 | H | 0.77764400  | 2.99340200  | -2.82138200 |
| H                                                          | -5.57034900 | -0.43075900 | -2.15568900 | C | 2.54333800  | 3.37589400  | -3.94527200 |
| H                                                          | -5.68529000 | -2.19225500 | -2.00435100 | H | 3.54365100  | 2.96515100  | -4.12174300 |
| H                                                          | -6.75111600 | -0.16093600 | 0.04501500  | H | 1.98726800  | 3.28120200  | -4.88381700 |
|                                                            |             |             |             | H | 2.64936800  | 4.44122600  | -3.71549500 |
|                                                            |             |             |             | C | 1.75184400  | 1.11981000  | -3.12551000 |
| <b>INT5</b>                                                |             |             |             | H | 1.25479800  | 0.93436900  | -4.08509900 |
| SCF Done: E(RωB97XD) = -2616.11697116                      |             |             | A.U.        | H | 2.76200100  | 0.69552600  | -3.17700800 |
| Sum of electronic and thermal Free Energies = -2615.223571 |             |             | A.U.        | H | 1.20132200  | 0.58595500  | -2.34330900 |
| SCF Done (single point): E(RωB97XD) = -2617.79248781       |             |             | A.U.        | C | -4.51105300 | 3.81955600  | 1.22130700  |
| no imaginary frequency                                     |             |             |             | H | -5.58974500 | 3.63875100  | 1.14861000  |
| N                                                          | -1.84613800 | 2.27623500  | -0.75461800 | H | -4.33384800 | 4.48522800  | 2.07315400  |
| N                                                          | 0.18281600  | 2.88403200  | -0.48290000 | H | -4.20033400 | 4.34370400  | 0.31271100  |
| C                                                          | -0.62782400 | 1.80150900  | -0.39059200 | C | -4.15729100 | 1.84167600  | 2.73422000  |
| C                                                          | -3.02891300 | 1.46363900  | -0.81770100 | H | -3.83085900 | 2.47004100  | 3.56985500  |
| C                                                          | -3.17996600 | 0.58595300  | -1.90327700 | H | -5.24359800 | 1.72506200  | 2.81846100  |
| C                                                          | -4.34589800 | -0.17511400 | -1.94829300 | H | -3.69992400 | 0.85647900  | 2.84884600  |
| C                                                          | -5.31439200 | -0.06152700 | -0.95899600 | C | 0.71157900  | 4.25877800  | 2.55295300  |
| C                                                          | -5.12772500 | 0.80176600  | 0.11096000  | H | 0.01785600  | 4.22420100  | 3.40039100  |
| C                                                          | -3.96950200 | 1.57338500  | 0.21452000  | H | 1.54697700  | 4.91589400  | 2.82245800  |
| C                                                          | -2.12215400 | 0.48620100  | -2.99272900 | H | 0.18505300  | 4.70987100  | 1.70527100  |
| C                                                          | -3.75589400 | 2.49496600  | 1.40592800  |   |             |             |             |

|    |             |             |             |                                               |                             |             |             |
|----|-------------|-------------|-------------|-----------------------------------------------|-----------------------------|-------------|-------------|
| C  | 1.86063800  | 2.19354300  | 3.44326600  | H                                             | -0.03396100                 | 0.05770900  | 3.73540700  |
| H  | 1.11364600  | 2.10034400  | 4.23812500  | C                                             | -0.96916200                 | -3.15840900 | 3.86647600  |
| H  | 2.23072200  | 1.18983400  | 3.21168400  | H                                             | 0.07156600                  | -3.09492200 | 4.19356800  |
| H  | 2.68773100  | 2.79137900  | 3.84372100  | H                                             | -1.62035000                 | -3.11484500 | 4.74795600  |
| C  | -2.05435400 | -0.89393300 | -3.65139700 | H                                             | -1.12101100                 | -4.12734400 | 3.37889600  |
| H  | -2.91678900 | -1.08372300 | -4.30176600 | C                                             | -3.21418700                 | -1.86478500 | 2.25324000  |
| H  | -1.15831700 | -0.95129500 | -4.28068700 | H                                             | -3.81594400                 | -1.61195300 | 3.13505800  |
| H  | -2.00544700 | -1.68275800 | -2.89542000 | H                                             | -3.48215600                 | -1.17454900 | 1.44544800  |
| C  | -2.31606200 | 1.58894300  | -4.04409700 | H                                             | -3.50598900                 | -2.87228700 | 1.93519400  |
| H  | -2.27649700 | 2.58663600  | -3.59439300 | C                                             | -0.51367000                 | -2.08618400 | 0.99061600  |
| H  | -1.52957700 | 1.53129500  | -4.80547700 | C                                             | 0.84591100                  | -1.99263400 | 0.64119400  |
| H  | -3.28468900 | 1.48003200  | -4.54603800 | C                                             | 1.38622100                  | -2.77144800 | -0.52333900 |
| H  | 5.41010800  | 3.08077800  | 0.13469700  | C                                             | 2.31433900                  | -3.79153300 | -0.29450200 |
| H  | -6.21531400 | -0.66532900 | -1.01439000 | C                                             | 0.96575000                  | -2.53229200 | -1.83555100 |
| Pd | -0.17606200 | -0.15389100 | 0.17436900  | C                                             | 2.81530500                  | -4.54678400 | -1.34908700 |
| C  | 3.16491000  | -0.95317300 | 1.19841500  | H                                             | 2.64706900                  | -3.99290300 | 0.72027700  |
| C  | 3.46044800  | -0.58416800 | -0.11685900 | C                                             | 1.46644000                  | -3.28597600 | -2.89162400 |
| H  | 2.68484400  | -0.59413100 | -0.87291200 | H                                             | 0.24262800                  | -1.74276400 | -2.01939800 |
| C  | 4.16994400  | -0.88335200 | 2.16721900  | C                                             | 2.39450500                  | -4.29530500 | -2.65301400 |
| H  | 3.92369900  | -1.15475500 | 3.18853200  | H                                             | 3.53909300                  | -5.33216700 | -1.15166200 |
| C  | 5.45648800  | -0.48624100 | 1.82424800  | H                                             | 1.12663200                  | -3.08252800 | -3.90325600 |
| H  | 6.23123700  | -0.44570600 | 2.58422100  | H                                             | 2.78849200                  | -4.88289900 | -3.47705500 |
| C  | 4.74961700  | -0.19969600 | -0.46109400 | C                                             | -1.35482200                 | -2.97914000 | 0.12689200  |
| H  | 4.96767200  | 0.07870600  | -1.48752100 | O                                             | -2.13516200                 | -2.63431000 | -0.73285300 |
| C  | 5.75176600  | -0.15681900 | 0.50396700  | O                                             | -1.16148700                 | -4.26335400 | 0.47713500  |
| H  | 6.76045300  | 0.13945700  | 0.22922200  | C                                             | -1.84520200                 | -5.25597000 | -0.30107100 |
| C  | 1.81626600  | -1.44430500 | 1.64501700  | H                                             | -1.86763200                 | -6.13563500 | 0.34562600  |
| C  | -1.79534800 | 3.62432800  | -1.07307000 | C                                             | -1.10493400                 | -5.53748700 | -1.59612400 |
| C  | -0.51323200 | 4.01028800  | -0.89798600 | H                                             | -1.56772800                 | -6.38488000 | -2.11314500 |
| H  | -2.66751100 | 4.16878300  | -1.39637900 | H                                             | -1.13683900                 | -4.66598800 | -2.25402300 |
| H  | -0.02450800 | 4.96115900  | -1.03840400 | H                                             | -0.05616000                 | -5.77577500 | -1.39447100 |
| O  | 1.54636000  | -1.43202800 | 2.84093600  | H                                             | -2.86806900                 | -4.91993200 | -0.49019800 |
| Si | -1.37251800 | -1.75812100 | 2.67486200  |                                               |                             |             |             |
| C  | -1.08323800 | -0.07549400 | 3.46861500  | <b>TS4</b>                                    |                             |             |             |
| H  | -1.37752600 | 0.73637900  | 2.79593900  | SCF Done:                                     | E(RωB97XD) = -2040.58037750 | A.U.        |             |
| H  | -1.69060500 | -0.00102600 | 4.38028100  | Sum of electronic and thermal Free Energies = | -2039.864235                | A.U.        |             |

| SCF Done (single point): E(R $\omega$ B97XD) = -2042.12266109 A.U. |             |             |             | H  | 0.41511000  | -2.07326000 | -2.01778900 |
|--------------------------------------------------------------------|-------------|-------------|-------------|----|-------------|-------------|-------------|
| $\nu_i = -111.31 \text{ cm}^{-1}$                                  |             |             |             | C  | -0.56403500 | 3.91677400  | 3.40744700  |
| N                                                                  | 0.17641000  | 2.26678500  | -0.19362500 | H  | -1.52511300 | 4.08613800  | 3.90586000  |
| N                                                                  | 2.00855300  | 1.27043800  | -0.62856100 | H  | 0.20769600  | 3.87214600  | 4.18333400  |
| C                                                                  | 0.76772800  | 1.04311800  | -0.12313000 | H  | -0.35861000 | 4.78308700  | 2.76950200  |
| C                                                                  | -1.20592500 | 2.48960300  | 0.12056400  | C  | -0.83413900 | 1.39444100  | 3.48770900  |
| C                                                                  | -2.12968300 | 2.48585500  | -0.93566700 | H  | -0.06249900 | 1.31696900  | 4.26185400  |
| C                                                                  | -3.47054000 | 2.70002900  | -0.61674800 | H  | -1.80749400 | 1.46965400  | 3.98663400  |
| C                                                                  | -3.86940700 | 2.89315200  | 0.70038600  | H  | -0.82497100 | 0.47374700  | 2.89192700  |
| C                                                                  | -2.93323600 | 2.87045500  | 1.72531500  | C  | 5.31299800  | 2.24372700  | 0.75106800  |
| C                                                                  | -1.57811500 | 2.67025700  | 1.45843400  | H  | 5.42033700  | 2.99283800  | 1.54316900  |
| C                                                                  | -1.71648500 | 2.18213300  | -2.36817400 | H  | 6.29552800  | 1.78985000  | 0.57732500  |
| C                                                                  | -0.57232500 | 2.61546100  | 2.59558000  | H  | 5.02111900  | 2.76080800  | -0.16835500 |
| C                                                                  | 2.98920800  | 0.24640900  | -0.84382400 | C  | 4.71526600  | 0.50745400  | 2.47210600  |
| C                                                                  | 4.09151000  | 0.17683300  | 0.02155300  | H  | 4.75078400  | 1.25904600  | 3.26803800  |
| C                                                                  | 5.03094200  | -0.82593900 | -0.21390100 | H  | 4.01246800  | -0.27484600 | 2.76906800  |
| C                                                                  | 4.86991600  | -1.72394500 | -1.26078200 | H  | 5.71443400  | 0.06390600  | 2.39942100  |
| C                                                                  | 3.77089500  | -1.62653200 | -2.10301000 | C  | -2.07639400 | 0.73384200  | -2.73042900 |
| C                                                                  | 2.80477100  | -0.63602000 | -1.91733000 | H  | -3.15892400 | 0.57093300  | -2.67546100 |
| C                                                                  | 4.29004400  | 1.17102400  | 1.15659500  | H  | -1.74524900 | 0.50490800  | -3.75021000 |
| C                                                                  | 1.64501000  | -0.51461300 | -2.89491200 | H  | -1.59905500 | 0.02665000  | -2.04182000 |
| H                                                                  | -4.21592900 | 2.69405900  | -1.40629800 | C  | -2.31211500 | 3.17423500  | -3.37380400 |
| H                                                                  | -3.25985500 | 3.00481200  | 2.75246600  | H  | -2.09024200 | 4.21009900  | -3.09587200 |
| H                                                                  | -0.62789000 | 2.27179500  | -2.43835700 | H  | -1.89563500 | 2.99029100  | -4.36982800 |
| H                                                                  | 0.42379500  | 2.49135700  | 2.16098400  | H  | -3.39992000 | 3.07085400  | -3.45267000 |
| H                                                                  | 5.89636500  | -0.91221500 | 0.43582000  | H  | 5.60779800  | -2.50414300 | -1.42214900 |
| H                                                                  | 3.65980600  | -2.33243100 | -2.92101200 | H  | -4.91921900 | 3.05112300  | 0.92957900  |
| H                                                                  | 3.33125500  | 1.66676300  | 1.34094700  | Pd | -0.40363600 | -0.66973200 | 0.38876600  |
| H                                                                  | 0.95987000  | 0.25324600  | -2.52644000 | C  | -3.12974700 | -2.07554900 | 0.09954300  |
| C                                                                  | 2.15482100  | -0.05475800 | -4.26790900 | C  | -3.74869100 | -0.82401600 | 0.04970900  |
| H                                                                  | 2.83848400  | -0.79089200 | -4.70638900 | H  | -3.16220200 | 0.06039400  | 0.28453600  |
| H                                                                  | 1.31563500  | 0.07832900  | -4.95971700 | C  | -3.87109700 | -3.22469100 | -0.19663100 |
| H                                                                  | 2.69058200  | 0.89782400  | -4.19175800 | H  | -3.38125300 | -4.19214600 | -0.14563600 |
| C                                                                  | 0.83331500  | -1.81018400 | -2.99468900 | C  | -5.21005300 | -3.11666000 | -0.55046000 |
| H                                                                  | 0.00190200  | -1.67462700 | -3.69531000 | H  | -5.78279000 | -4.00835800 | -0.78896100 |
| H                                                                  | 1.44034900  | -2.64901900 | -3.35401700 | C  | -5.09213400 | -0.71646900 | -0.28968000 |

|                                                            |             |             |             |   |             |             |             |
|------------------------------------------------------------|-------------|-------------|-------------|---|-------------|-------------|-------------|
| H                                                          | -5.56633100 | 0.26047500  | -0.31854900 | C | -1.93965900 | 3.35217100  | -1.23228500 |
| C                                                          | -5.82133700 | -1.86315800 | -0.59630800 | C | 1.13707900  | 3.77886500  | 1.05965100  |
| H                                                          | -6.87005600 | -1.78240900 | -0.86906400 | C | -3.16958000 | 2.46338000  | -1.35515900 |
| C                                                          | -1.68930300 | -2.14660600 | 0.45929600  | C | -2.03145400 | -1.00593000 | 2.01979300  |
| C                                                          | 1.02018100  | 3.22611300  | -0.72592400 | C | -3.27346800 | -1.45534500 | 1.54360100  |
| C                                                          | 2.17894800  | 2.59245900  | -1.00972900 | C | -3.59104000 | -2.79689200 | 1.75192800  |
| H                                                          | 0.71215200  | 4.25093300  | -0.85900900 | C | -2.71584300 | -3.64144200 | 2.42084200  |
| H                                                          | 3.09770200  | 2.94827600  | -1.44662200 | C | -1.49775600 | -3.16384300 | 2.88507200  |
| O                                                          | -1.24768600 | -3.32162700 | 0.72775900  | C | -1.12089200 | -1.83598300 | 2.68257200  |
| Si                                                         | 0.48463600  | -2.87448300 | 1.41419000  | C | -4.28533400 | -0.51890100 | 0.89740800  |
| C                                                          | 0.03806700  | -3.86942000 | 2.96864600  | C | 0.20556000  | -1.31023300 | 3.19516300  |
| H                                                          | -0.63421700 | -3.28415900 | 3.60906000  | H | 1.22640600  | 5.60633400  | -0.96945300 |
| H                                                          | -0.47452300 | -4.80537900 | 2.72636400  | H | -2.36821900 | 4.49868100  | -2.99536400 |
| H                                                          | 0.93373300  | -4.09598000 | 3.55896500  | H | 0.95875700  | 2.79502400  | 1.50236500  |
| C                                                          | 1.78681600  | -1.68910100 | 2.19013300  | H | -2.88664800 | 1.46807700  | -1.00293500 |
| H                                                          | 2.29472100  | -1.08483100 | 1.43687700  | H | -4.53800400 | -3.18486300 | 1.38845000  |
| H                                                          | 1.35686800  | -1.01979800 | 2.94353900  | H | -0.82196400 | -3.83536300 | 3.40609600  |
| H                                                          | 2.53809800  | -2.32411700 | 2.68650800  | H | -3.79952300 | 0.44261000  | 0.71612300  |
| C                                                          | 1.48558400  | -3.84408000 | 0.14322800  | H | 0.41159400  | -0.35393000 | 2.71186200  |
| H                                                          | 2.20824200  | -4.47958100 | 0.67168400  | C | 0.12931400  | -1.04718200 | 4.70490100  |
| H                                                          | 0.86151500  | -4.48368800 | -0.48741400 | H | -0.04024200 | -1.97723700 | 5.26128800  |
| H                                                          | 2.05716700  | -3.16634100 | -0.49902900 | H | 1.06503100  | -0.59823700 | 5.05284800  |
|                                                            |             |             |             | H | -0.68734500 | -0.35724900 | 4.94517300  |
| <b>TS2-2</b>                                               |             |             |             | C | 1.38137800  | -2.23274800 | 2.85767400  |
| SCF Done: E(RωB97XD) = -2616.02688968                      | A.U.        |             |             | H | 2.31227200  | -1.76503100 | 3.19202600  |
| Sum of electronic and thermal Free Energies = -2615.132531 | A.U.        |             |             | H | 1.30116400  | -3.20760200 | 3.35280900  |
| SCF Done (single point): E(RωB97XD) = -2617.71108549       | A.U.        |             |             | H | 1.46417800  | -2.39956800 | 1.77871200  |
| $\nu_i = -119.00 \text{ cm}^{-1}$                          |             |             |             | C | -4.32827900 | 2.98406700  | -0.49033300 |
| N                                                          | -1.30746700 | 2.23851500  | 0.84246200  | H | -4.63813900 | 3.98206700  | -0.82258900 |
| N                                                          | -1.72081900 | 0.38546200  | 1.83331400  | H | -5.19154300 | 2.31411500  | -0.57880100 |
| C                                                          | -1.10760100 | 0.90184600  | 0.73957700  | H | -4.06287400 | 3.04495900  | 0.56877100  |
| C                                                          | -1.01586200 | 3.20499700  | -0.18193000 | C | -3.64475700 | 2.27980600  | -2.79864200 |
| C                                                          | 0.14145600  | 3.98205800  | -0.06841400 | H | -4.39582700 | 1.48465700  | -2.82901400 |
| C                                                          | 0.34513900  | 4.97537300  | -1.02960100 | H | -4.10933900 | 3.19003000  | -3.19706200 |
| C                                                          | -0.56050500 | 5.16439100  | -2.06249400 | H | -2.82424800 | 1.98071500  | -3.45456200 |
| C                                                          | -1.68411800 | 4.35411600  | -2.16634500 | C | -5.44877300 | -0.26126600 | 1.86662300  |

|    |             |             |             |   |             |             |             |
|----|-------------|-------------|-------------|---|-------------|-------------|-------------|
| H  | -6.14705700 | 0.46785300  | 1.44078600  | C | 0.53566500  | 1.61534600  | -3.08919200 |
| H  | -6.00268300 | -1.18514400 | 2.06901900  | H | -0.53698300 | 1.42633700  | -3.00856100 |
| H  | -5.08966700 | 0.13002700  | 2.82463400  | H | 0.79506800  | 2.46322700  | -2.44693500 |
| C  | -4.79721200 | -1.01584500 | -0.45848500 | H | 0.77077000  | 1.89327800  | -4.12603000 |
| H  | -5.54498100 | -0.31336900 | -0.84533200 | C | 1.21434200  | -1.32538400 | -3.86276300 |
| H  | -3.98800000 | -1.07876000 | -1.18885500 | H | 0.21834100  | -1.75990400 | -3.74629400 |
| H  | -5.27487300 | -1.99875100 | -0.38248800 | H | 1.29057500  | -0.92054500 | -4.88022200 |
| C  | 2.58305800  | 3.78859800  | 0.55374700  | H | 1.95806300  | -2.12150900 | -3.76502900 |
| H  | 2.87554600  | 4.76687400  | 0.15622000  | C | 3.34383000  | 0.62823300  | -2.90956300 |
| H  | 3.26337100  | 3.55769400  | 1.37917400  | H | 3.42327600  | 1.07764500  | -3.90796400 |
| H  | 2.72913600  | 3.03879100  | -0.22998900 | H | 3.63149500  | 1.38495300  | -2.17239700 |
| C  | 0.94011600  | 4.83245600  | 2.15858900  | H | 4.05821200  | -0.19703400 | -2.84857400 |
| H  | -0.07199400 | 4.79408700  | 2.57488000  | C | 2.26773900  | -0.63652900 | -0.56102700 |
| H  | 1.64730900  | 4.66162000  | 2.97731700  | C | 2.11895700  | 0.26910800  | 0.37288500  |
| H  | 1.10474400  | 5.84325300  | 1.76663200  | C | 3.13262100  | -1.79976400 | -0.80924400 |
| H  | -2.98176000 | -4.68313000 | 2.57418500  | C | 4.50440100  | -1.73873400 | -0.52811000 |
| H  | -0.38418300 | 5.94019300  | -2.80187900 | C | 2.59142700  | -2.99598800 | -1.29045900 |
| Pd | 0.23538900  | -0.04739800 | -0.50595400 | C | 5.30838200  | -2.85574600 | -0.71941700 |
| C  | -1.47451100 | -2.42918400 | -1.44575400 | H | 4.92417400  | -0.80855100 | -0.16145700 |
| C  | -0.79021900 | -3.15847000 | -0.47642800 | C | 3.39843800  | -4.11373500 | -1.47385900 |
| H  | -0.10846800 | -2.64040100 | 0.19044000  | H | 1.53071100  | -3.04702300 | -1.51317400 |
| C  | -2.36604500 | -3.09451400 | -2.29431100 | C | 4.75958000  | -4.04665400 | -1.19148200 |
| H  | -2.89224400 | -2.51444300 | -3.04638500 | H | 6.37110400  | -2.79510400 | -0.50261900 |
| C  | -2.56485500 | -4.46316700 | -2.17181200 | H | 2.95939100  | -5.03636500 | -1.84187700 |
| H  | -3.25585100 | -4.97407500 | -2.83654200 | H | 5.39166000  | -4.91717900 | -1.34049500 |
| C  | -0.98442800 | -4.52997900 | -0.35061100 | C | 2.86051400  | 0.70918600  | 1.54092900  |
| H  | -0.44881900 | -5.08114600 | 0.41672800  | O | 2.39429500  | 0.92671000  | 2.64418200  |
| C  | -1.87186400 | -5.18431000 | -1.19878800 | O | 4.16894100  | 0.91538700  | 1.26605600  |
| H  | -2.02632000 | -6.25553800 | -1.10333600 | C | 4.97431200  | 1.36853100  | 2.35907500  |
| C  | -1.25773700 | -0.93890700 | -1.61358000 | H | 4.52746000  | 2.27096600  | 2.78826200  |
| C  | -1.99817300 | 2.55385300  | 2.00348100  | H | 4.97940800  | 0.60171300  | 3.14029700  |
| C  | -2.25706800 | 1.38665200  | 2.62814200  | C | 6.36177000  | 1.63034900  | 1.81273500  |
| H  | -2.24196500 | 3.57303700  | 2.25575900  | H | 6.32979000  | 2.39507500  | 1.03129000  |
| H  | -2.77695000 | 1.16365200  | 3.54565400  | H | 7.02058700  | 1.97921700  | 2.61398800  |
| O  | -1.97097100 | -0.35065300 | -2.41331800 | H | 6.79064200  | 0.71823900  | 1.38677100  |
| Si | 1.54930000  | 0.08376900  | -2.66000200 |   |             |             |             |

|                                                                 |             |             |             |    |             |             |             |
|-----------------------------------------------------------------|-------------|-------------|-------------|----|-------------|-------------|-------------|
| <b>TS2-3</b>                                                    |             |             |             | C  | -1.07665100 | 4.26401200  | 1.57306200  |
| SCF Done: E(RoB97XD) = -2615.99152104 A.U.                      |             |             |             | H  | -1.97760300 | 4.82737400  | 1.30493100  |
| Sum of electronic and thermal Free Energies = -2615.091271 A.U. |             |             |             | H  | -0.42474400 | 4.93994300  | 2.13607700  |
| SCF Done (single point): E(RoB97XD) = -2617.67796495 A.U.       |             |             |             | H  | -0.56113500 | 3.98767700  | 0.65210300  |
| $\nu_i = -85.65 \text{ cm}^{-1}$                                |             |             |             | C  | -5.80114300 | -2.50010100 | 0.15114600  |
| N                                                               | -2.74016200 | -0.27462400 | 0.41882500  | H  | -6.51682500 | -2.60871100 | -0.67168900 |
| N                                                               | -1.33537500 | 0.15757800  | 1.98901500  | H  | -6.01225400 | -3.28016800 | 0.89090300  |
| C                                                               | -1.39973900 | -0.11841200 | 0.64883900  | H  | -5.99098900 | -1.52723900 | 0.61615300  |
| C                                                               | -3.37694300 | -0.30602200 | -0.87705800 | C  | -4.16645300 | -4.00649300 | -1.00481400 |
| C                                                               | -3.38099700 | 0.88190500  | -1.63677400 | H  | -4.28976900 | -4.78393100 | -0.24268500 |
| C                                                               | -3.92195600 | 0.81818000  | -2.91950100 | H  | -4.90940100 | -4.19967500 | -1.78648300 |
| C                                                               | -4.49372600 | -0.35029100 | -3.40455300 | H  | -3.17480100 | -4.11328600 | -1.44612900 |
| C                                                               | -4.59468600 | -1.46283100 | -2.58539900 | C  | -0.05711500 | -2.04847500 | 4.23903300  |
| C                                                               | -4.05591100 | -1.46118700 | -1.29721100 | H  | -0.12984000 | -3.13971800 | 4.17517800  |
| C                                                               | -2.97444500 | 2.22690000  | -1.04256700 | H  | 0.40189900  | -1.79258400 | 5.20120700  |
| C                                                               | -4.35757900 | -2.62639500 | -0.36793300 | H  | -1.07508800 | -1.64555700 | 4.22878500  |
| C                                                               | -0.22529600 | 0.79117900  | 2.65958200  | C  | 2.15006300  | -2.17072900 | 3.02532900  |
| C                                                               | 0.83377000  | 0.01389300  | 3.14958600  | H  | 2.01764300  | -3.24055600 | 2.83148200  |
| C                                                               | 1.88735500  | 0.67641500  | 3.77680500  | H  | 2.76750300  | -1.76743000 | 2.21924600  |
| C                                                               | 1.86380300  | 2.05520200  | 3.94827500  | H  | 2.69105900  | -2.07769600 | 3.97486800  |
| C                                                               | 0.78172700  | 2.79428900  | 3.49643900  | C  | -2.68901700 | 3.31354900  | -2.08153700 |
| C                                                               | -0.28312100 | 2.18425200  | 2.83130200  | H  | -3.60845000 | 3.65215800  | -2.57390100 |
| C                                                               | 0.78009400  | -1.49816700 | 3.07506600  | H  | -2.24911100 | 4.18185500  | -1.57920200 |
| C                                                               | -1.47094900 | 3.02853700  | 2.38928500  | H  | -1.98366600 | 2.96253900  | -2.83687200 |
| H                                                               | -3.90644200 | 1.70035600  | -3.54872600 | C  | -4.08695200 | 2.72440900  | -0.10114000 |
| H                                                               | -5.10799900 | -2.34844900 | -2.94659100 | H  | -4.27213500 | 2.03816600  | 0.72923700  |
| H                                                               | -2.06072800 | 2.08975600  | -0.45755400 | H  | -3.81521300 | 3.69727100  | 0.32327600  |
| H                                                               | -3.68669800 | -2.56598000 | 0.48953400  | H  | -5.02487900 | 2.84750300  | -0.65478100 |
| H                                                               | 2.73138400  | 0.10644800  | 4.15017800  | H  | 2.69080600  | 2.55274300  | 4.44678600  |
| H                                                               | 0.76902100  | 3.86963400  | 3.64526900  | H  | -4.90011400 | -0.37791400 | -4.41114200 |
| H                                                               | 0.27102900  | -1.74762700 | 2.14469100  | Pd | 0.32172200  | -0.46731300 | -0.47867100 |
| H                                                               | -2.10867500 | 2.41738600  | 1.74780200  | C  | -3.46808600 | -0.16819600 | 1.59736100  |
| C                                                               | -2.30679800 | 3.44151900  | 3.61079300  | C  | -2.58817000 | 0.09709000  | 2.57941500  |
| H                                                               | -1.73333600 | 4.10629100  | 4.26693600  | H  | -4.53926600 | -0.27876200 | 1.61462300  |
| H                                                               | -3.20871200 | 3.97500600  | 3.29125200  | H  | -2.72701000 | 0.27488000  | 3.63323500  |
| H                                                               | -2.61590000 | 2.57558000  | 4.20513300  | C  | 2.08723200  | -1.61430600 | -0.94878200 |

|    |             |             |             |                                                            |             |             |             |
|----|-------------|-------------|-------------|------------------------------------------------------------|-------------|-------------|-------------|
| C  | 2.18994100  | -0.41594200 | -1.39480400 | H                                                          | 6.22510700  | 1.79129300  | -1.31631700 |
| Si | -0.08928700 | -2.94825200 | -0.35578900 | H                                                          | 5.78365300  | 2.93235900  | -3.47664000 |
| C  | -0.85427200 | -3.05390400 | -2.08169200 | C                                                          | 3.08500300  | -2.69849500 | -1.00059400 |
| H  | -0.07207700 | -2.81910700 | -2.81231800 | O                                                          | 3.43408900  | -3.26343800 | -2.01036900 |
| H  | -1.21023100 | -4.06979500 | -2.29437900 | O                                                          | 3.62174000  | -2.93741200 | 0.20628600  |
| H  | -1.67222200 | -2.34540200 | -2.24034900 | C                                                          | 4.60785700  | -3.97708800 | 0.25020900  |
| C  | -1.28779200 | -3.36628900 | 1.07469000  | H                                                          | 4.17609300  | -4.88960000 | -0.17258700 |
| H  | -1.97700300 | -4.14976700 | 0.73569500  | H                                                          | 5.45804100  | -3.68872300 | -0.37552700 |
| H  | -0.70507500 | -3.79751200 | 1.89682000  | C                                                          | 5.00495300  | -4.15978700 | 1.69960400  |
| H  | -1.87384100 | -2.54261200 | 1.48491900  | H                                                          | 4.14444800  | -4.46487300 | 2.30236900  |
| C  | 0.99000800  | -4.50687600 | -0.20578900 | H                                                          | 5.77528200  | -4.93305000 | 1.77915700  |
| H  | 0.28760600  | -5.34579700 | -0.11457900 | H                                                          | 5.40341900  | -3.22919500 | 2.11458300  |
| H  | 1.62278100  | -4.70423700 | -1.07380800 |                                                            |             |             |             |
| H  | 1.61453200  | -4.50290600 | 0.69388600  | <b>TS2-4</b>                                               |             |             |             |
| C  | 0.24358600  | 1.36675800  | -1.46676500 | SCF Done: E(RoB97XD) = -2615.98682276                      | A.U.        |             |             |
| O  | -0.33876900 | 1.39250000  | -2.53207100 | Sum of electronic and thermal Free Energies = -2615.089402 | A.U.        |             |             |
| C  | 0.93892500  | 2.59917500  | -0.95504800 | SCF Done (single point): E(RoB97XD) = -2617.67300933       | A.U.        |             |             |
| C  | 1.72397000  | 2.55378800  | 0.19459900  | $v_i = -104.63 \text{ cm}^{-1}$                            |             |             |             |
| C  | 0.83299000  | 3.79619300  | -1.66994800 | N                                                          | -2.66965100 | -0.64161300 | 0.46794700  |
| C  | 2.39041500  | 3.69266300  | 0.63374100  | N                                                          | -1.50127800 | 0.52381800  | 1.84581300  |
| H  | 1.81416500  | 1.61676000  | 0.73895300  | C                                                          | -1.40911500 | -0.14062900 | 0.65108900  |
| C  | 1.48350400  | 4.93870800  | -1.22380300 | C                                                          | -3.18323200 | -1.19318000 | -0.76317100 |
| H  | 0.24171200  | 3.80677400  | -2.57976500 | C                                                          | -3.34828800 | -0.31685600 | -1.85533700 |
| C  | 2.26531200  | 4.88680800  | -0.06950800 | C                                                          | -3.74925700 | -0.87549500 | -3.06727400 |
| H  | 3.00052500  | 3.64607500  | 1.53052000  | C                                                          | -4.04264000 | -2.22836800 | -3.17531800 |
| H  | 1.39303300  | 5.86894800  | -1.77738900 | C                                                          | -4.00733900 | -3.03676700 | -2.05063300 |
| H  | 2.78106400  | 5.77823300  | 0.27662300  | C                                                          | -3.59327400 | -2.53514500 | -0.81481300 |
| C  | 3.15538600  | 0.49120000  | -1.99438100 | C                                                          | -3.27330500 | 1.19866800  | -1.69629000 |
| C  | 2.91173900  | 1.13469800  | -3.21146300 | C                                                          | -3.75401100 | -3.39846000 | 0.42751500  |
| C  | 4.35764100  | 0.73331300  | -1.31856900 | C                                                          | -0.61208100 | 1.56355900  | 2.30461000  |
| C  | 3.85934500  | 2.00174000  | -3.74159700 | C                                                          | 0.56717400  | 1.23373900  | 2.98441300  |
| H  | 1.97135800  | 0.96421300  | -3.72458200 | C                                                          | 1.37652300  | 2.27909400  | 3.42760300  |
| C  | 5.29736500  | 1.60754800  | -1.85055200 | C                                                          | 1.00969700  | 3.60299600  | 3.22636000  |
| H  | 4.53873600  | 0.23633300  | -0.36966800 | C                                                          | -0.17270300 | 3.90272300  | 2.56697800  |
| C  | 5.05093700  | 2.24545200  | -3.06343200 | C                                                          | -1.00419100 | 2.89464800  | 2.07800200  |
| H  | 3.66169300  | 2.49602900  | -4.68815200 | C                                                          | 0.92106100  | -0.20678100 | 3.28668800  |



|   |             |             |             |    |             |             |             |
|---|-------------|-------------|-------------|----|-------------|-------------|-------------|
| C | -2.29582100 | 3.27562800  | 1.36670500  | H  | -2.28233800 | 1.57084100  | -3.59982400 |
| H | -3.84412300 | -0.24177200 | -3.94119900 | C  | -4.54765600 | 1.69361700  | -0.98683600 |
| H | -4.31218600 | -4.07564400 | -2.12908200 | H  | -4.67227500 | 1.25648800  | 0.00777200  |
| H | -2.41122300 | 1.44541800  | -1.07039000 | H  | -4.51689800 | 2.78286500  | -0.87163300 |
| H | -3.19470100 | -2.93920400 | 1.24349900  | H  | -5.43346400 | 1.44099300  | -1.58104000 |
| H | 2.30173000  | 2.05396400  | 3.94793300  | H  | 1.64907300  | 4.40350500  | 3.58728700  |
| H | -0.44778400 | 4.94114900  | 2.40907700  | H  | -4.34222600 | -2.64307300 | -4.13308400 |
| H | 0.43235300  | -0.82011300 | 2.53089200  | Pd | 0.43495400  | -0.44624300 | -0.28544600 |
| H | -2.72579800 | 2.37446100  | 0.92584900  | C  | -3.48790700 | -0.35764100 | 1.55418800  |
| C | -3.31649900 | 3.82957800  | 2.37219700  | C  | -2.75329300 | 0.36385100  | 2.41984800  |
| H | -2.95995000 | 4.76721500  | 2.81384600  | H  | -4.51197800 | -0.68891100 | 1.59562600  |
| H | -4.27073800 | 4.03070800  | 1.87316000  | H  | -2.99784700 | 0.80335600  | 3.37298300  |
| H | -3.50257800 | 3.12707700  | 3.19081000  | C  | 2.45765700  | -1.39399900 | -0.46739800 |
| C | -2.08275500 | 4.27114400  | 0.22025700  | C  | 2.33272600  | -0.25197100 | -1.03309700 |
| H | -3.04754400 | 4.50997000  | -0.24103100 | Si | 0.52285900  | -2.86395800 | 0.55304200  |
| H | -1.64425000 | 5.21240200  | 0.56818300  | C  | -0.11960600 | -3.63821800 | -1.04980900 |
| H | -1.42840000 | 3.86069000  | -0.55109700 | H  | 0.63015700  | -3.48608300 | -1.83385600 |
| C | -5.23961700 | -3.42800800 | 0.83005600  | H  | -0.26905300 | -4.71959700 | -0.94139200 |
| H | -5.83395200 | -3.94150700 | 0.06576700  | H  | -1.04791300 | -3.17914900 | -1.40139000 |
| H | -5.36995200 | -3.96179700 | 1.77787500  | C  | -0.69005600 | -2.99794700 | 2.03014600  |
| H | -5.65986600 | -2.42292800 | 0.94228600  | H  | -1.18909800 | -3.97404700 | 1.98263400  |
| C | -3.24111900 | -4.83329000 | 0.27246700  | H  | -0.10194000 | -2.99617400 | 2.95544100  |
| H | -3.30981400 | -5.35318500 | 1.23436900  | H  | -1.45146700 | -2.22380500 | 2.12468300  |
| H | -3.83798600 | -5.40412400 | -0.44735600 | C  | 1.79854500  | -4.09956600 | 1.23792200  |
| H | -2.20152900 | -4.85514300 | -0.05543100 | H  | 1.20838300  | -4.91822100 | 1.67182600  |
| C | 0.36320600  | -0.61417000 | 4.65656800  | H  | 2.46818500  | -4.53181500 | 0.49301700  |
| H | 0.59608700  | -1.66346800 | 4.86903400  | H  | 2.41646700  | -3.68381800 | 2.04100900  |
| H | 0.79717200  | -0.00000400 | 5.45444000  | C  | 0.08739400  | 0.97887700  | -1.74822000 |
| H | -0.72547700 | -0.49688700 | 4.69148600  | O  | -0.41336100 | 0.56065400  | -2.76721300 |
| C | 2.41951600  | -0.49091400 | 3.18254600  | C  | 0.48450000  | 2.42531400  | -1.62622600 |
| H | 2.59236900  | -1.57113400 | 3.23908600  | C  | 1.11984200  | 2.90426700  | -0.48311500 |
| H | 2.81205500  | -0.13050600 | 2.22647000  | C  | 0.23604700  | 3.29429300  | -2.69434200 |
| H | 2.98947800  | -0.02647800 | 3.99568500  | C  | 1.48958800  | 4.24350600  | -0.39712900 |
| C | -3.11289500 | 1.96457300  | -3.01140100 | H  | 1.32983400  | 2.22076800  | 0.33468400  |
| H | -4.03027700 | 1.93059600  | -3.61129400 | C  | 0.59841400  | 4.63166300  | -2.60697800 |
| H | -2.90794800 | 3.01754400  | -2.78941600 | H  | -0.23344600 | 2.89615800  | -3.58771200 |

|                                                                 |             |             |             |   |             |             |             |
|-----------------------------------------------------------------|-------------|-------------|-------------|---|-------------|-------------|-------------|
| C                                                               | 1.22557200  | 5.10818200  | -1.45458500 | C | -5.02376900 | -1.34457000 | 0.69485800  |
| H                                                               | 1.97334200  | 4.60972700  | 0.50316400  | C | -4.91911300 | -1.80710400 | 1.99864700  |
| H                                                               | 0.40114200  | 5.30472900  | -3.43632300 | C | -3.92781000 | -1.30963600 | 2.83295900  |
| H                                                               | 1.50960700  | 6.15461900  | -1.38472700 | C | -3.04617200 | -0.31788100 | 2.39780200  |
| C                                                               | 3.09582000  | 0.70044000  | -1.83589300 | C | -4.30324400 | 0.07723000  | -1.24970600 |
| O                                                               | 3.05242000  | 0.79212400  | -3.04037500 | C | -2.01947200 | 0.25893200  | 3.35232100  |
| O                                                               | 3.82321500  | 1.50951100  | -1.04582600 | C | 0.13803300  | 2.65803500  | -1.43800600 |
| C                                                               | 4.44979200  | 2.61348300  | -1.71252900 | C | 0.80568400  | 3.88068700  | -1.26384400 |
| H                                                               | 5.16128800  | 2.23304000  | -2.45165900 | C | 1.93791300  | 4.11514400  | -2.04965400 |
| H                                                               | 3.67920500  | 3.18233700  | -2.24313600 | C | 2.39077300  | 3.17417800  | -2.95744000 |
| C                                                               | 5.12874300  | 3.44839100  | -0.64845000 | C | 1.66283600  | 2.00913900  | -3.16928700 |
| H                                                               | 5.88697000  | 2.86435600  | -0.11837800 | C | 0.49900600  | 1.74335600  | -2.45036000 |
| H                                                               | 5.61474500  | 4.31472800  | -1.10814700 | C | 0.31612700  | 4.99452500  | -0.34802600 |
| H                                                               | 4.39433700  | 3.80719900  | 0.07842500  | C | -0.43236800 | 0.61427900  | -2.88280900 |
| C                                                               | 3.54852000  | -2.37404900 | -0.41328700 | H | -5.78299600 | -1.75945600 | 0.03831200  |
| C                                                               | 3.72960900  | -3.26399900 | -1.47738400 | H | -3.84547100 | -1.68360400 | 3.84895300  |
| C                                                               | 4.45828700  | -2.38333600 | 0.64671300  | H | -3.50094200 | 0.77910200  | -1.48683500 |
| C                                                               | 4.78574600  | -4.16819400 | -1.46271300 | H | -1.33993500 | 0.88235600  | 2.77135000  |
| H                                                               | 3.03469100  | -3.24033200 | -2.31114200 | H | 2.48139200  | 5.04682400  | -1.92954100 |
| C                                                               | 5.51623600  | -3.28472800 | 0.65494100  | H | 1.99405900  | 1.30934500  | -3.92808300 |
| H                                                               | 4.32992200  | -1.68221400 | 1.46413600  | H | -0.41600300 | 4.58182500  | 0.34854200  |
| C                                                               | 5.67764500  | -4.18689400 | -0.39315600 | H | -0.87623500 | 0.15185000  | -1.99949000 |
| H                                                               | 4.91343500  | -4.85888200 | -2.29105500 | C | -1.57316500 | 1.22008100  | -3.71934100 |
| H                                                               | 6.21776000  | -3.28323200 | 1.48415400  | H | -1.17771100 | 1.69535400  | -4.62459900 |
| H                                                               | 6.49943900  | -4.89659700 | -0.38140600 | H | -2.27630800 | 0.43681700  | -4.02202200 |
|                                                                 |             |             |             | H | -2.13201100 | 1.97681000  | -3.15759500 |
|                                                                 |             |             |             | C | 0.25343100  | -0.50707400 | -3.66175800 |
|                                                                 |             |             |             | H | -0.48808400 | -1.27700000 | -3.89316500 |
|                                                                 |             |             |             | H | 0.66025700  | -0.15912700 | -4.61822600 |
|                                                                 |             |             |             | H | 1.05419300  | -0.98214300 | -3.08582800 |
|                                                                 |             |             |             | C | -2.70186600 | 1.16073500  | 4.38914400  |
|                                                                 |             |             |             | H | -3.39899900 | 0.59080100  | 5.01477300  |
|                                                                 |             |             |             | H | -1.95365800 | 1.61652400  | 5.04695400  |
|                                                                 |             |             |             | H | -3.26295100 | 1.96644200  | 3.90301800  |
|                                                                 |             |             |             | C | -1.16987900 | -0.82870800 | 4.01676300  |
|                                                                 |             |             |             | H | -0.45663300 | -0.36771400 | 4.70709200  |
| <b>TS2'-1</b>                                                   |             |             |             |   |             |             |             |
| SCF Done: E(RωB97XD) = -2615.98681255 A.U.                      |             |             |             |   |             |             |             |
| Sum of electronic and thermal Free Energies = -2615.091454 A.U. |             |             |             |   |             |             |             |
| SCF Done (single point): E(RωB97XD) = -2617.67089012 A.U.       |             |             |             |   |             |             |             |
| $\nu_i = -277.69 \text{ cm}^{-1}$                               |             |             |             |   |             |             |             |
| N                                                               | -2.39984500 | 1.25393600  | 0.60858700  | H | -3.39899900 | 0.59080100  | 5.01477300  |
| N                                                               | -0.99560000 | 2.33277600  | -0.61339600 | H | -1.95365800 | 1.61652400  | 5.04695400  |
| C                                                               | -1.11743500 | 1.20286200  | 0.14931300  | H | -3.26295100 | 1.96644200  | 3.90301800  |
| C                                                               | -3.19150900 | 0.14733500  | 1.08581100  | C | -1.16987900 | -0.82870800 | 4.01676300  |
| C                                                               | -4.15365800 | -0.37376100 | 0.19978400  | H | -0.45663300 | -0.36771400 | 4.70709200  |

|    |             |             |             |   |             |             |             |
|----|-------------|-------------|-------------|---|-------------|-------------|-------------|
| H  | -1.77890000 | -1.52915700 | 4.59928500  | H | 2.83911600  | 2.77662800  | 0.08810200  |
| H  | -0.59769000 | -1.39457000 | 3.27437200  | H | 2.42171700  | 1.74027400  | 4.19414200  |
| C  | -0.37532500 | 6.08467400  | -1.18558300 | H | 1.52752800  | 0.21329800  | 4.03129500  |
| H  | -0.81117700 | 6.84961200  | -0.53373300 | H | 3.14260000  | 0.36282800  | 3.34475200  |
| H  | 0.34876300  | 6.57559600  | -1.84575600 | C | 2.14741900  | -1.28750200 | 1.17153700  |
| H  | -1.16879200 | 5.68414700  | -1.82576400 | O | 2.02698400  | -1.83823700 | 2.24075200  |
| C  | 1.42294800  | 5.63008200  | 0.50061200  | C | 3.47323100  | -0.91043000 | 0.58553400  |
| H  | 0.97932600  | 6.33003700  | 1.21674300  | C | 3.56190300  | -0.29772800 | -0.66366700 |
| H  | 1.97996500  | 4.87691500  | 1.05780600  | C | 4.63167100  | -1.17252900 | 1.31799800  |
| H  | 2.13207300  | 6.19746500  | -0.11214000 | C | 4.80288000  | 0.04895500  | -1.18254300 |
| C  | -4.16839900 | -1.08006900 | -2.24613700 | H | 2.65160200  | -0.06501200 | -1.20997200 |
| H  | -4.91294700 | -1.86367400 | -2.07267100 | C | 5.87242800  | -0.81809300 | 0.80246700  |
| H  | -4.31502400 | -0.70208800 | -3.26430600 | H | 4.53637000  | -1.65099200 | 2.28797000  |
| H  | -3.17996600 | -1.54075400 | -2.18833800 | C | 5.95885000  | -0.20979600 | -0.44982400 |
| C  | -5.63769600 | 0.80908700  | -1.45693000 | H | 4.86520000  | 0.53402500  | -2.15179200 |
| H  | -5.76237000 | 1.63977500  | -0.75466400 | H | 6.77486300  | -1.01493800 | 1.37380500  |
| H  | -5.69903600 | 1.21034400  | -2.47429800 | H | 6.92925200  | 0.06600800  | -0.85240800 |
| H  | -6.48391100 | 0.12749200  | -1.31405000 | C | 2.03250100  | -3.04764800 | -0.79196300 |
| H  | 3.29364600  | 3.36213100  | -3.53087700 | O | 2.12599800  | -3.18358600 | -1.99332100 |
| H  | -5.60616100 | -2.56528900 | 2.36305100  | O | 2.75984200  | -3.72564900 | 0.09064400  |
| Pd | 0.35560800  | -0.14247000 | 0.55138300  | C | 3.82301700  | -4.52605100 | -0.44702300 |
| C  | -3.02887700 | 2.42452100  | 0.20627600  | H | 3.39077100  | -5.35456100 | -1.01595300 |
| C  | -2.16050900 | 3.08754200  | -0.57666800 | H | 4.40727700  | -3.90719700 | -1.13498500 |
| H  | -4.04542200 | 2.64295100  | 0.48836900  | C | 4.65222000  | -5.00404700 | 0.72500800  |
| H  | -2.25970000 | 4.01389600  | -1.11581600 | H | 4.04233500  | -5.58804600 | 1.41976400  |
| C  | 1.05968000  | -2.10601800 | -0.17450200 | H | 5.47303400  | -5.63317900 | 0.36673000  |
| C  | -0.22027000 | -2.00103700 | -0.31785900 | H | 5.07460000  | -4.15077500 | 1.26285200  |
| Si | 1.47407700  | 1.58510200  | 1.89824400  | C | -1.26458200 | -2.84694600 | -0.87555100 |
| C  | 0.28536800  | 2.93526100  | 2.56806600  | C | -1.14669300 | -3.41776700 | -2.15135100 |
| C  | 2.98626300  | 2.44167900  | 1.11754000  | C | -2.36913600 | -3.17592800 | -0.08259400 |
| C  | 2.20588800  | 0.90081400  | 3.51942400  | C | -2.13146200 | -4.27658500 | -2.62695700 |
| H  | -0.17312800 | 2.57324600  | 3.49610900  | H | -0.26686300 | -3.20239200 | -2.74700400 |
| H  | 0.84220800  | 3.84422600  | 2.82730800  | C | -3.33406100 | -4.05881500 | -0.55192100 |
| H  | -0.53176700 | 3.21988200  | 1.89864900  | H | -2.45427700 | -2.73855900 | 0.90689300  |
| H  | 3.28159400  | 3.30477100  | 1.72911400  | C | -3.22570700 | -4.60322200 | -1.82887800 |
| H  | 3.83294700  | 1.74809400  | 1.11967600  | H | -2.03147300 | -4.70956200 | -3.61815500 |

|                                                            |             |             |             |    |             |             |             |
|------------------------------------------------------------|-------------|-------------|-------------|----|-------------|-------------|-------------|
| H                                                          | -4.18044000 | -4.30961200 | 0.08100400  | H  | -1.73580800 | -0.60500500 | -4.64607400 |
| H                                                          | -3.98658600 | -5.28447100 | -2.19875900 | H  | -1.02727300 | -1.99357400 | -3.79250000 |
|                                                            |             |             |             | H  | -2.48403600 | -1.20961700 | -3.15613000 |
| <b>TS2'-2</b>                                              |             |             |             | C  | 0.73998200  | 0.06820500  | -3.49523000 |
| SCF Done: E(RωB97XD) = -2615.98728466                      | A.U.        |             |             | H  | 1.26688600  | -0.88598900 | -3.43053900 |
| Sum of electronic and thermal Free Energies = -2615.089243 | A.U.        |             |             | H  | 0.66798700  | 0.34525200  | -4.55365700 |
| SCF Done (single point): E(RωB97XD) = -2617.67252833       | A.U.        |             |             | H  | 1.34804000  | 0.82069200  | -2.98151500 |
| $\nu_i = -248.89 \text{ cm}^{-1}$                          |             |             |             | C  | -2.87363900 | -1.13342700 | 4.21238200  |
| N                                                          | -2.36472600 | -1.27174500 | 0.69904500  | H  | -2.85623800 | -1.95533500 | 4.93782600  |
| N                                                          | -2.59908800 | 0.34194300  | -0.70834100 | H  | -3.08886100 | -0.20490000 | 4.75294900  |
| C                                                          | -1.69124500 | -0.22734000 | 0.13972700  | H  | -3.69704700 | -1.31595300 | 3.51255000  |
| C                                                          | -1.74519100 | -2.40197800 | 1.34990000  | C  | -0.39041600 | -0.67174800 | 4.42694700  |
| C                                                          | -1.63418400 | -3.59094200 | 0.60978000  | H  | -0.60395900 | 0.28936400  | 4.90742100  |
| C                                                          | -1.02781100 | -4.67978400 | 1.23507500  | H  | -0.27226600 | -1.41106400 | 5.22768400  |
| C                                                          | -0.54100600 | -4.58496700 | 2.52905400  | H  | 0.55796000  | -0.57615000 | 3.88925600  |
| C                                                          | -0.67740800 | -3.40077100 | 3.23901600  | C  | -5.68365100 | 2.61726600  | -1.36743000 |
| C                                                          | -1.28890300 | -2.28633100 | 2.66876700  | H  | -6.51061100 | 2.70914900  | -0.65505000 |
| C                                                          | -2.19634400 | -3.76236400 | -0.79720300 | H  | -5.80055300 | 3.40171000  | -2.12371200 |
| C                                                          | -1.53221000 | -1.02581500 | 3.47383400  | H  | -5.78329700 | 1.65646600  | -1.88344800 |
| C                                                          | -2.36056400 | 1.41151300  | -1.64411400 | C  | -4.27447000 | 4.12105000  | 0.06578000  |
| C                                                          | -3.17961900 | 2.55423100  | -1.61155300 | H  | -5.02513400 | 4.15743500  | 0.86232400  |
| C                                                          | -2.93515400 | 3.55633500  | -2.55405400 | H  | -3.29288900 | 4.29330700  | 0.50938000  |
| C                                                          | -1.91062600 | 3.44408300  | -3.47684900 | H  | -4.48684500 | 4.94590900  | -0.62326200 |
| C                                                          | -1.13828500 | 2.29120900  | -3.51060200 | C  | -1.16189700 | -4.26602700 | -1.80665200 |
| C                                                          | -1.36131100 | 1.23845400  | -2.62445800 | H  | -0.69432500 | -5.20312400 | -1.48772900 |
| C                                                          | -4.33591100 | 2.76057500  | -0.64166100 | H  | -1.64405300 | -4.44188600 | -2.77532400 |
| C                                                          | -0.63335000 | -0.08292600 | -2.83697200 | H  | -0.37780500 | -3.52131200 | -1.95243600 |
| H                                                          | -0.91702700 | -5.61306400 | 0.69145900  | C  | -3.41878300 | -4.69266400 | -0.76601900 |
| H                                                          | -0.30097200 | -3.34058900 | 4.25466700  | H  | -4.17270200 | -4.34786400 | -0.05036900 |
| H                                                          | -2.53106200 | -2.79067800 | -1.16762000 | H  | -3.88527300 | -4.74976000 | -1.75568800 |
| H                                                          | -1.61196100 | -0.20305200 | 2.76552800  | H  | -3.12897800 | -5.70755800 | -0.47096600 |
| H                                                          | -3.55178500 | 4.44968900  | -2.54867200 | H  | -1.72379000 | 4.24501600  | -4.18584500 |
| H                                                          | -0.36362200 | 2.19814700  | -4.26328400 | H  | -0.05212400 | -5.43912200 | 2.98703300  |
| H                                                          | -4.28591700 | 1.99615900  | 0.13538500  | Pd | 0.22908800  | 0.26944800  | 0.59948600  |
| H                                                          | -0.45590400 | -0.55403900 | -1.87085900 | C  | -3.67785500 | -1.31163700 | 0.25886400  |
| C                                                          | -1.52591200 | -1.02787000 | -3.65647500 | C  | -3.81986700 | -0.31886700 | -0.63772900 |

|    |             |             |             |                                                            |             |             |             |
|----|-------------|-------------|-------------|------------------------------------------------------------|-------------|-------------|-------------|
| H  | -4.36646300 | -2.06709900 | 0.59973000  | H                                                          | 0.40885400  | 2.13973100  | 3.88783000  |
| H  | -4.66115600 | -0.02406600 | -1.24099500 | H                                                          | 1.21277100  | 3.38472000  | 2.92558000  |
| C  | 2.31571900  | -0.49638200 | 0.28412600  | C                                                          | 2.10388900  | 1.07229400  | 1.45364700  |
| C  | 1.42348800  | -1.36915700 | -0.04297400 | O                                                          | 2.32384000  | 0.77207000  | 2.60672400  |
| C  | 3.77054100  | -0.38871000 | 0.03540400  | C                                                          | 2.72336300  | 2.27279500  | 0.80394100  |
| C  | 4.71853300  | -0.37777000 | 1.05967200  | C                                                          | 2.43681200  | 2.60342100  | -0.51886100 |
| C  | 4.19573200  | -0.36563000 | -1.29754500 | C                                                          | 3.60010600  | 3.06544500  | 1.54465000  |
| C  | 6.07396500  | -0.35271400 | 0.75276200  | C                                                          | 3.02468500  | 3.71770000  | -1.10360000 |
| H  | 4.38662000  | -0.38031200 | 2.09291000  | H                                                          | 1.72886700  | 1.99248000  | -1.07383100 |
| C  | 5.55218000  | -0.33535700 | -1.59878800 | C                                                          | 4.18237200  | 4.18548000  | 0.96444700  |
| H  | 3.45261600  | -0.37701300 | -2.08808800 | H                                                          | 3.80953800  | 2.78994200  | 2.57357800  |
| C  | 6.49478600  | -0.32714400 | -0.57450300 | C                                                          | 3.89755600  | 4.51001300  | -0.36084700 |
| H  | 6.80550700  | -0.35028800 | 1.55518800  | H                                                          | 2.79627800  | 3.97261500  | -2.13401100 |
| H  | 5.87260000  | -0.31421100 | -2.63644600 | H                                                          | 4.85932000  | 4.80645700  | 1.54348500  |
| H  | 7.55492000  | -0.29866400 | -0.80868500 | H                                                          | 4.35510400  | 5.38434600  | -0.81475400 |
| C  | 1.66919500  | -2.69667200 | -0.59512200 |                                                            |             |             |             |
| O  | 1.79565900  | -3.71505900 | 0.04264500  | <b>TS2<sup>‡</sup>-3</b>                                   |             |             |             |
| O  | 1.79053300  | -2.65508600 | -1.94628800 | SCF Done: E(RoB97XD) = -2615.99087147                      | A.U.        |             |             |
| C  | 2.22209400  | -3.86948400 | -2.57268700 | Sum of electronic and thermal Free Energies = -2615.091920 | A.U.        |             |             |
| H  | 3.27371100  | -4.03622300 | -2.31700400 | SCF Done (single point): E(RoB97XD) = -2617.67699709       | A.U.        |             |             |
| H  | 1.64497300  | -4.70859300 | -2.17737600 | $\nu_i = -134.86 \text{ cm}^{-1}$                          |             |             |             |
| C  | 2.02581900  | -3.70190700 | -4.06456600 | N                                                          | 2.76097100  | -0.14147700 | 0.33122200  |
| H  | 2.60070500  | -2.85099200 | -4.44241100 | N                                                          | 1.36620500  | -0.49981300 | 1.92949600  |
| H  | 2.35776400  | -4.60339800 | -4.58881000 | C                                                          | 1.42069800  | -0.11952900 | 0.61449000  |
| H  | 0.96912700  | -3.53593600 | -4.29771200 | C                                                          | 3.33415200  | -0.04618200 | -0.98962900 |
| Si | -0.66405700 | 2.31300600  | 1.60301500  | C                                                          | 3.06440800  | -1.09120100 | -1.89690100 |
| C  | -2.43915800 | 2.12460700  | 2.30019800  | C                                                          | 3.51889100  | -0.93744500 | -3.20499600 |
| C  | -0.59854300 | 3.81645100  | 0.44033300  | C                                                          | 4.27341200  | 0.16634000  | -3.58030600 |
| C  | 0.24275200  | 2.93569800  | 3.15652100  | C                                                          | 4.64874300  | 1.10176400  | -2.63072200 |
| H  | -2.37404300 | 1.73079000  | 3.32100800  | C                                                          | 4.20287900  | 1.01016300  | -1.31009700 |
| H  | -2.92239400 | 3.10570300  | 2.37588500  | C                                                          | 2.47131100  | -2.42039700 | -1.43897800 |
| H  | -3.10350200 | 1.45995300  | 1.74041700  | C                                                          | 4.79794000  | 1.94292700  | -0.26603800 |
| H  | -1.11026900 | 4.67075100  | 0.90376800  | C                                                          | 0.21006700  | -1.04100200 | 2.60080600  |
| H  | 0.44665400  | 4.10835800  | 0.29583600  | C                                                          | -0.73377500 | -0.18630400 | 3.18791300  |
| H  | -1.03321500 | 3.64627700  | -0.54712100 | C                                                          | -1.82018700 | -0.77314900 | 3.83711000  |
| H  | -0.37997700 | 3.70989800  | 3.62507700  | C                                                          | -1.94005900 | -2.15290100 | 3.93455200  |

|   |             |             |             |    |             |             |             |
|---|-------------|-------------|-------------|----|-------------|-------------|-------------|
| C | -0.97435200 | -2.97466000 | 3.37444500  | C  | 1.97198100  | -3.31053600 | -2.57812700 |
| C | 0.11324700  | -2.44169400 | 2.68206200  | H  | 2.80332200  | -3.70164300 | -3.17650200 |
| C | -0.52948800 | 1.31544700  | 3.22122400  | H  | 1.44237300  | -4.17035300 | -2.15434000 |
| C | 1.15676000  | -3.38820800 | 2.10140000  | H  | 1.28387600  | -2.76972000 | -3.23060000 |
| H | 3.29303900  | -1.69847500 | -3.94246900 | C  | 3.53696600  | -3.19549800 | -0.64103700 |
| H | 5.30480700  | 1.91868400  | -2.91426000 | H  | 3.86880600  | -2.65739400 | 0.25094000  |
| H | 1.62098500  | -2.22330400 | -0.77925500 | H  | 3.13653800  | -4.16277400 | -0.31833900 |
| H | 4.18344700  | 1.89506300  | 0.63314400  | H  | 4.41531500  | -3.38464800 | -1.26879600 |
| H | -2.57239600 | -0.14049000 | 4.29611000  | H  | -2.78739100 | -2.58799700 | 4.45676300  |
| H | -1.07502700 | -4.05244100 | 3.45996500  | H  | 4.60680400  | 0.27117000  | -4.60839700 |
| H | 0.08665300  | 1.57819600  | 2.36169400  | Pd | -0.20802600 | 0.68397600  | -0.38662700 |
| H | 1.85128000  | -2.80740000 | 1.49186000  | C  | 3.50850300  | -0.46022100 | 1.45805300  |
| C | 1.96827800  | -4.04240000 | 3.22952500  | C  | 2.63621300  | -0.67456600 | 2.45906800  |
| H | 1.33300300  | -4.69247600 | 3.84218200  | H  | 4.58392600  | -0.51121400 | 1.43173500  |
| H | 2.77478600  | -4.65465300 | 2.81151200  | H  | 2.78578700  | -0.95840400 | 3.48791900  |
| H | 2.41575000  | -3.29647900 | 3.89433400  | C  | -1.84392000 | 1.79976800  | -1.01315800 |
| C | 0.55846500  | -4.45878300 | 1.18273200  | C  | -2.17654600 | 0.61632500  | -1.36628600 |
| H | 1.35154800  | -5.13107600 | 0.83686400  | Si | 0.71211600  | 2.90605300  | 0.04298800  |
| H | -0.19006400 | -5.07250700 | 1.69422700  | C  | 1.43223400  | 3.34615500  | -1.65389600 |
| H | 0.08454600  | -4.01171300 | 0.30722800  | H  | 0.59428200  | 3.38896500  | -2.35956400 |
| C | 6.21117800  | 1.45045500  | 0.09639200  | H  | 1.91048200  | 4.33425000  | -1.64972500 |
| H | 6.88484700  | 1.55323200  | -0.76199400 | H  | 2.14210800  | 2.60577600  | -2.03346200 |
| H | 6.62258800  | 2.03955100  | 0.92340300  | C  | 1.99804100  | 3.01886300  | 1.45946200  |
| H | 6.22301600  | 0.39432800  | 0.38626600  | H  | 2.77050400  | 3.75367000  | 1.20065100  |
| C | 4.86923000  | 3.41312900  | -0.69019300 | H  | 1.49304100  | 3.39858500  | 2.35557900  |
| H | 5.21306700  | 4.02049000  | 0.15429700  | H  | 2.49185000  | 2.08654700  | 1.74164600  |
| H | 5.58081600  | 3.56679200  | -1.50902300 | C  | -0.34713300 | 4.42628100  | 0.48861200  |
| H | 3.89683200  | 3.78965400  | -1.00828400 | H  | 0.33123700  | 5.20221100  | 0.86628300  |
| C | 0.24743700  | 1.69656500  | 4.48960100  | H  | -0.85824800 | 4.83908600  | -0.38494300 |
| H | 0.43673300  | 2.77537100  | 4.51231900  | H  | -1.09302300 | 4.22708000  | 1.26343700  |
| H | -0.31720600 | 1.42980700  | 5.39100700  | C  | -0.69469700 | -1.06206700 | -1.56517000 |
| H | 1.21484200  | 1.18424600  | 4.53094700  | O  | -0.16606800 | -1.03842000 | -2.65235000 |
| C | -1.82560300 | 2.11793900  | 3.09876300  | C  | -1.38530400 | -2.28788000 | -1.04822400 |
| H | -1.58999500 | 3.18704000  | 3.11068400  | C  | -2.05861700 | -2.27157800 | 0.17035900  |
| H | -2.34098700 | 1.90247500  | 2.15770800  | C  | -1.43849800 | -3.42872400 | -1.85463000 |
| H | -2.51394900 | 1.93523800  | 3.93185500  | C  | -2.77981700 | -3.38650900 | 0.58276400  |

|                                                            |             |             |             |   |             |             |             |
|------------------------------------------------------------|-------------|-------------|-------------|---|-------------|-------------|-------------|
| H                                                          | -2.02854800 | -1.37391500 | 0.78290900  | C | -1.40466000 | 0.31384100  | 0.53966600  |
| C                                                          | -2.14238600 | -4.54908600 | -1.43472300 | C | -3.16547500 | -0.17204900 | -1.16273400 |
| H                                                          | -0.93965900 | -3.41173700 | -2.81751700 | C | -2.76098900 | 0.58493800  | -2.28201000 |
| C                                                          | -2.81854700 | -4.52580300 | -0.21528900 | C | -3.08924600 | 0.09150100  | -3.54286500 |
| H                                                          | -3.30784100 | -3.36286400 | 1.53032200  | C | -3.85761700 | -1.05639800 | -3.68827600 |
| H                                                          | -2.18057300 | -5.43464300 | -2.06236400 | C | -4.37191000 | -1.68934400 | -2.56928400 |
| H                                                          | -3.38248700 | -5.39615700 | 0.10826300  | C | -4.05131700 | -1.25633000 | -1.28008500 |
| C                                                          | -3.35294000 | -0.11228800 | -1.83758500 | C | -2.16665200 | 1.98239400  | -2.13170000 |
| C                                                          | -3.39444000 | -0.77279600 | -3.06811300 | C | -4.78929000 | -1.86541300 | -0.09577800 |
| C                                                          | -4.48905500 | -0.11048800 | -1.01912800 | C | -0.38866700 | 1.71189000  | 2.36534100  |
| C                                                          | -4.55577100 | -1.42121300 | -3.47055500 | C | 0.52219500  | 1.05301300  | 3.20085200  |
| H                                                          | -2.51074300 | -0.78274000 | -3.69804800 | C | 1.48716600  | 1.82825200  | 3.84752000  |
| C                                                          | -5.64641500 | -0.76268300 | -1.42604500 | C | 1.53487700  | 3.20445500  | 3.68425900  |
| H                                                          | -4.44959100 | 0.40868000  | -0.06618300 | C | 0.62542200  | 3.83180400  | 2.84598500  |
| C                                                          | -5.68203800 | -1.42307800 | -2.65138900 | C | -0.34378700 | 3.10436700  | 2.15689300  |
| H                                                          | -4.57983300 | -1.93035700 | -4.42938800 | C | 0.46381800  | -0.43957900 | 3.45909000  |
| H                                                          | -6.52197100 | -0.75658700 | -0.78322900 | C | -1.30728600 | 3.85086600  | 1.24180300  |
| H                                                          | -6.58514500 | -1.93652900 | -2.96779900 | H | -2.75636700 | 0.61979600  | -4.42843300 |
| C                                                          | -2.54005700 | 3.08548300  | -1.07417200 | H | -5.03813700 | -2.53707600 | -2.69371900 |
| O                                                          | -2.50175600 | 3.86422100  | -1.99784800 | H | -1.38967900 | 1.96159000  | -1.36238300 |
| O                                                          | -3.26158100 | 3.28118800  | 0.04364800  | H | -4.26295600 | -1.59722100 | 0.82071400  |
| C                                                          | -3.94233600 | 4.53887000  | 0.13549200  | H | 2.20309100  | 1.34374700  | 4.50348500  |
| H                                                          | -3.22129400 | 5.34303700  | -0.03906400 | H | 0.67868800  | 4.90786400  | 2.70922100  |
| H                                                          | -4.70344900 | 4.59229600  | -0.64900000 | H | -0.16315900 | -0.88498300 | 2.68632300  |
| C                                                          | -4.54623000 | 4.61759500  | 1.52139700  | H | -1.90820000 | 3.12079700  | 0.69694500  |
| H                                                          | -3.76479600 | 4.55123800  | 2.28449400  | C | -2.26928700 | 4.72529400  | 2.05882000  |
| H                                                          | -5.07250800 | 5.56906600  | 1.64554100  | H | -1.72855100 | 5.52493900  | 2.57809500  |
| H                                                          | -5.25847400 | 3.80313800  | 1.68384200  | H | -3.00880400 | 5.19200700  | 1.39890800  |
|                                                            |             |             |             | H | -2.80691200 | 4.14395300  | 2.81445500  |
| <b>TS2'-4</b>                                              |             |             |             | C | -0.58437900 | 4.69392700  | 0.18524900  |
| SCF Done: E(RøB97XD) = -2615.98769114                      | A.U.        |             |             | H | -1.31891900 | 5.23512600  | -0.42142700 |
| Sum of electronic and thermal Free Energies = -2615.089091 | A.U.        |             |             | H | 0.08131800  | 5.43837800  | 0.63408400  |
| SCF Done (single point): E(RøB97XD) = -2617.67377260       | A.U.        |             |             | H | 0.01269200  | 4.06758700  | -0.47993300 |
| $\nu_i = -171.77 \text{ cm}^{-1}$                          |             |             |             | C | -6.20522100 | -1.26356500 | -0.02857100 |
| N                                                          | -2.71319700 | 0.26167700  | 0.13574500  | H | -6.79592400 | -1.57929200 | -0.89612700 |
| N                                                          | -1.46622800 | 0.99397200  | 1.72791300  | H | -6.72293900 | -1.60097800 | 0.87600300  |

|    |             |             |             |   |             |             |             |
|----|-------------|-------------|-------------|---|-------------|-------------|-------------|
| H  | -6.19430500 | -0.16834300 | -0.03218200 | H | -2.89119100 | -3.30134900 | 1.96561200  |
| C  | -4.89258100 | -3.39359000 | -0.12122300 | H | -1.67136400 | -2.62324200 | 3.03591600  |
| H  | -5.36186800 | -3.74206500 | 0.80524200  | H | -2.63008800 | -1.54832600 | 2.02752500  |
| H  | -5.51336700 | -3.74813600 | -0.95148400 | C | 0.21650300  | -4.16139200 | 1.62471900  |
| H  | -3.91205400 | -3.86211700 | -0.20362000 | H | -0.51813800 | -4.80471100 | 2.12782800  |
| C  | -0.19500400 | -0.72240100 | 4.81477100  | H | 0.80039100  | -4.79124500 | 0.95040300  |
| H  | -0.27033300 | -1.80235200 | 4.98306800  | H | 0.89759500  | -3.78063600 | 2.39192400  |
| H  | 0.38703600  | -0.28963600 | 5.63717200  | C | 1.02022700  | 0.73691100  | -1.50771200 |
| H  | -1.20552900 | -0.30126400 | 4.85633200  | O | 0.63599400  | 0.44158300  | -2.61067100 |
| C  | 1.84466100  | -1.09390400 | 3.35001100  | C | 1.62439800  | 2.07164700  | -1.19730600 |
| H  | 1.74925800  | -2.17888100 | 3.45098300  | C | 2.13834700  | 2.35470700  | 0.06521400  |
| H  | 2.30193900  | -0.88105100 | 2.37850400  | C | 1.77363700  | 2.99962100  | -2.23409400 |
| H  | 2.52769000  | -0.75405800 | 4.13660200  | C | 2.80724800  | 3.55477200  | 0.28999000  |
| C  | -1.53320400 | 2.53738200  | -3.40836900 | H | 2.03235500  | 1.62609100  | 0.86386100  |
| H  | -2.28915400 | 2.74800700  | -4.17406900 | C | 2.42205600  | 4.20484500  | -2.00367500 |
| H  | -1.03370600 | 3.48411400  | -3.17638200 | H | 1.39190100  | 2.74705900  | -3.21764800 |
| H  | -0.79048300 | 1.84882600  | -3.81650600 | C | 2.94645600  | 4.47980000  | -0.73929200 |
| C  | -3.27892500 | 2.94530300  | -1.67463300 | H | 3.21721600  | 3.76069000  | 1.27282100  |
| H  | -3.71536800 | 2.65726600  | -0.71422300 | H | 2.53389700  | 4.92562600  | -2.80838100 |
| H  | -2.88046000 | 3.96037900  | -1.57154100 | H | 3.46679600  | 5.41653400  | -0.56111300 |
| H  | -4.08395200 | 2.97037700  | -2.41798200 | C | 2.55823300  | -3.28867500 | -0.28773100 |
| H  | 2.28519700  | 3.78861600  | 4.20925100  | C | 3.43051400  | -3.56184700 | 0.77098500  |
| H  | -4.09315100 | -1.42911600 | -4.68060300 | C | 2.29877200  | -4.28164700 | -1.23705300 |
| Pd | 0.27972800  | -0.73669000 | -0.09557400 | C | 4.00556600  | -4.82088600 | 0.89393500  |
| C  | -3.55684000 | 0.83260100  | 1.07954200  | H | 3.64609100  | -2.78254100 | 1.49469700  |
| C  | -2.77778100 | 1.27739100  | 2.08079500  | C | 2.88410800  | -5.53666800 | -1.11439500 |
| H  | -4.62370800 | 0.87400400  | 0.94043600  | H | 1.63602200  | -4.05977600 | -2.06773200 |
| H  | -3.01649700 | 1.79183600  | 2.99706400  | C | 3.72983300  | -5.81399200 | -0.04290100 |
| C  | 1.95526900  | -1.96875200 | -0.40971200 | H | 4.67572600  | -5.02672700 | 1.72355000  |
| C  | 2.35162600  | -0.78231300 | -0.68478500 | H | 2.67521500  | -6.30167200 | -1.85644000 |
| Si | -0.76023600 | -2.79248900 | 0.72807600  | H | 4.17902900  | -6.79755200 | 0.05759700  |
| C  | -1.42253700 | -3.66573700 | -0.82204200 | C | 3.64717500  | -0.10457900 | -0.86455400 |
| H  | -0.56184200 | -3.92257900 | -1.44912400 | O | 4.44581200  | 0.03415000  | 0.03477300  |
| H  | -1.93303400 | -4.60495300 | -0.57213900 | O | 3.83153200  | 0.34170800  | -2.10928300 |
| H  | -2.08842100 | -3.04393900 | -1.42626600 | C | 4.96576900  | 1.20009700  | -2.29948200 |
| C  | -2.12741200 | -2.51713100 | 2.04398200  | H | 4.87537000  | 2.04256200  | -1.60505500 |



|                                                           |             |             |             |   |             |             |             |
|-----------------------------------------------------------|-------------|-------------|-------------|---|-------------|-------------|-------------|
| H                                                         | 5.87883800  | 0.65081900  | -2.05243500 | H | -2.40623100 | -2.13042600 | 0.13426100  |
| C                                                         | 4.94425900  | 1.65587200  | -3.74209500 | H | -1.69850100 | 2.09518700  | -0.12626100 |
| H                                                         | 4.01683200  | 2.19409700  | -3.95653300 | H | -4.14683200 | 2.50688900  | -0.12364000 |
| H                                                         | 5.78823300  | 2.32643600  | -3.93214300 | H | -5.72298000 | 0.59769900  | 0.01185600  |
| H                                                         | 5.01680100  | 0.80242800  | -4.42222300 | C | -0.49145800 | -0.28206200 | -0.00488200 |
|                                                           |             |             |             | C | 0.70043700  | -0.48301000 | -0.01404800 |
| <b>Alkyne 5j</b>                                          |             |             |             | C | 2.11328900  | -0.79561100 | -0.03779300 |
| SCF Done: E(RωB97XD) = -575.391144876                     | A.U.        |             |             | O | 2.56082100  | -1.91725700 | -0.09519400 |
| Sum of electronic and thermal Free Energies = -575.248203 | A.U.        |             |             | O | 2.85462700  | 0.31882300  | 0.00999600  |
| SCF Done (single point): E(RωB97XD) = -575.524304443      | A.U.        |             |             | C | 4.27688600  | 0.11387300  | -0.01975700 |
| no imaginary frequency                                    |             |             |             | H | 4.55715800  | -0.55165100 | 0.80202400  |
| C                                                         | -4.16516100 | -0.88498200 | 0.08284700  | H | 4.54094400  | -0.38554600 | -0.95703800 |
| C                                                         | -2.79629200 | -1.11936200 | 0.07864200  | C | 4.93056200  | 1.47357700  | 0.10273200  |
| C                                                         | -1.90145500 | -0.04302700 | 0.00305200  | H | 4.65594300  | 1.95314400  | 1.04642100  |
| C                                                         | -2.39660500 | 1.26641400  | -0.06842700 | H | 6.01885300  | 1.36248000  | 0.07365800  |
| C                                                         | -3.76702800 | 1.49153500  | -0.06572800 | H | 4.62666200  | 2.12698400  | -0.71995200 |
| C                                                         | -4.65207700 | 0.41826900  | 0.00983400  |   |             |             |             |
| H                                                         | -4.85517800 | -1.72098000 | 0.14141500  |   |             |             |             |

## IX. References

- (1) Capaldo, L.; Riccardi, R.; Ravelli, D.; Fagnoni, M. Acyl Radicals from Acylsilanes: Photoredox-Catalyzed Synthesis of Unsymmetrical Ketones. *ACS Catal.* **2018**, *8*, 304-309.
- (2) Schmink, J. R.; Krska, S. W. Reversed-Polarity Synthesis of Diaryl Ketones via Palladium-Catalyzed Cross-Coupling of Acylsilanes. *J. Am. Chem. Soc.* **2011**, *133*, 19574-19577.
- (3) Zhang, J.; Cheng, C.; Wang, D.; Miao, Z. Regio- and Diastereoselective Construction of Spirocyclopenteneoxindoles through Phosphine-Catalyzed [3 + 2] Annulation of Methyleneindolinone with Alkynoate Derivatives. *J. Org. Chem.* **2017**, *82*, 10121-10128.
- (4) Nelson, A. K.; Peck, C. L.; Rafferty, S. M.; Santos, W. L. Chemo-, Regio-, and Stereoselective Copper(II)-Catalyzed Boron Addition to Acetylenic Esters and Amides in Aqueous Media. *J. Org. Chem.* **2016**, *81*, 4269-4279.
- (5) Molloy, J. J.; Schäfer, M.; Wienhold, M.; Morack, T.; Daniliuc, C. G.; Gilmour, R. Boron-enabled geometric isomerization of alkenes via selective energy-transfer catalysis. *Science* **2020**, *369*, 302-306.
- (6) Gao, H.; Zhang, J. Cationic Rhodium(I)-Catalyzed Regioselective Tandem Heterocyclization/[3+2] Cycloaddition of 2-(1-Alkynyl)-2-alken-1-ones with Alkynes. *Chem. Eur. J.* **2012**, *18*, 2777-2782.
- (7) Cocolletzi-Xochitiotzi, A. P.; Hernández-Hernández, M. Medina-Mercado, I.; Jiménez-Martínez, W. de J. Mastranzo, V. M. Porcel, S. Gold-Catalyzed Partial Hydrogenation of Activated Alkynes Mediated by Triphenylphosphine. *Synthesis* **2020**, *52*, 2379-2386.
- (8) Picher, M. -I.; Plietker, B. Fe-Catalyzed Selective Cyclopropanation of Enynes under Photochemical or Thermal Conditions. *Org. Lett.* **2020**, *22*, 340-344.
- (9) Li, X.; Ma, X.; Wang, Z.; Liu, P. -N.; Zhang, L. Bifunctional Phosphine Ligand Enabled Gold-Catalyzed Alkynamide Cycloisomerization: Access to Electron-Rich 2-Aminofurans and Their Diels–Alder Adducts. *Angew. Chem. Int. Ed.* **2019**, *58*, 17180-17184.
- (10) Krawczyk, E.; Kprowski, M.; Łuczak, J. *Tetrahedron: Asymmetry* **2007**, *18*, 1780-1787.
- (11) Fürstner, A.; Nagano, T. *J. Am. Chem. Soc.* **2007**, *129*, 1906-1907.
- (12) Cotman, A. E.; Modéc, B.; Mohar, B. *Org. Lett.* **2018**, *20*, 2921-2924.
- (13) Frisch, M. J.; Trucks, G. W.; Schlegel, H. B.; Scuseria, G. E.; Robb, M. A.; Cheeseman, J. R.; Scalmani, G.; Barone, V.; Mennucci, B.; Petersson, G. A.; Nakatsuji, H.; Caricato, M.; Li, X.; Hratchian, H. P.; Izmaylov, A. F.; Bloino, J.; Zheng, G.; Sonnenberg, J. L.; Hada, M.; Ehara, M.; Toyota, K.; Fukuda, R.; Hasegawa, J.; Ishida, M.; Nakajima, T.; Honda, Y.; Kitao, O.; Nakai, H.; Vreven, T.; Montgomery, J. A., Jr.; Peralta, J. E.; Ogliaro, F.; Bearpark, M.; Heyd, J. J.; Brothers, E.; Kudin, K. N.; Staroverov, V. N.; Keith, T.; Kobayashi, R.; Normand, J.; Raghavachari, K.; Rendell, A.; Burant, J. C.; Iyengar, S. S.; Tomasi, J.; Cossi, M.; Rega, N.; Millam, N. J.; Klene, M.; Knox, J. E.; Cross, J. B.; Bakken, V.; Adamo, C.; Jaramillo, J.; Gomperts, R.; Stratmann, R. E.; Yazyev, O.;

Austin, A. J.; Cammi, R.; Pomelli, C.; Ochterski, J. W.; Martin, R. L.; Morokuma, K.; Zakrzewski, V. G.; Voth, G. A.; Salvador, P.; Dannenberg, J. J.; Dapprich, S.; Daniels, A. D.; Farkas, Ö .; Foresman, J. B.; Ortiz, J. V.; Cioslowski, J.; Fox, D. J. Gaussian 09, Revision D.01; Gaussian, Inc.: Wallingford, CT, 2013.

(14) (a) Becke, A. D. Density-Functional Thermochemistry. V. Systematic Optimization of Exchange-Correlation Functionals. *J. Chem. Phys.* **1997**, *107*, 8554-8560. (b) Chai, J.-D.; Head-Gordon, M. Long-range corrected hybrid density functionals with damped atom-atom dispersion corrections. *Phys. Chem. Chem. Phys.* **2008**, *10*, 6615-6620.

(15) Fukui, K. Formulation of the reaction coordinate. *J. Phys. Chem.* **1970**, *74*, 4161-4163.

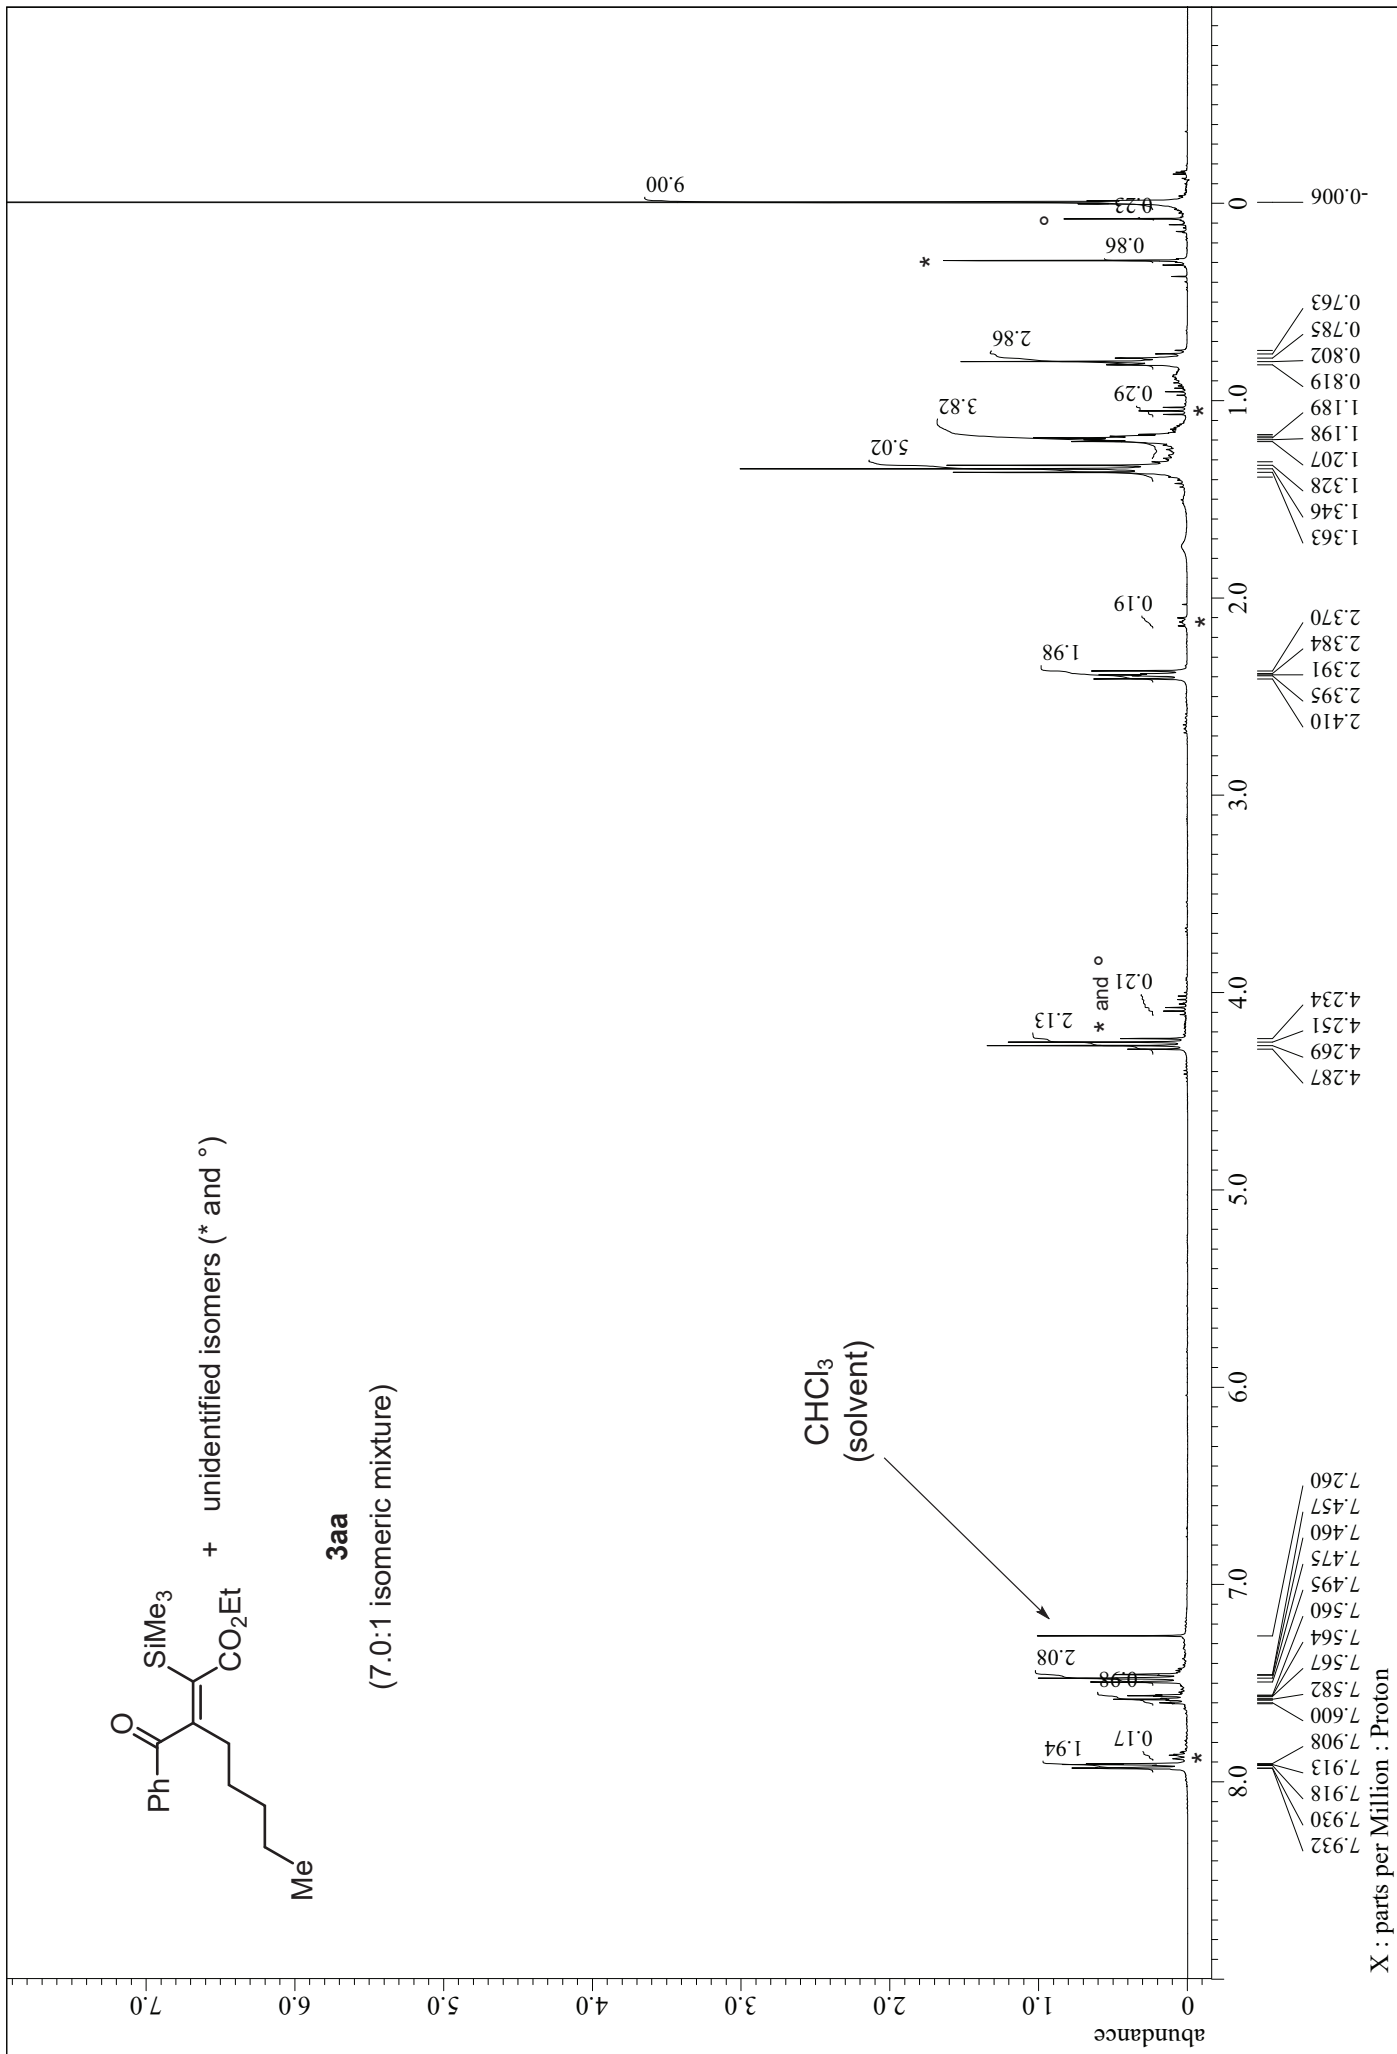

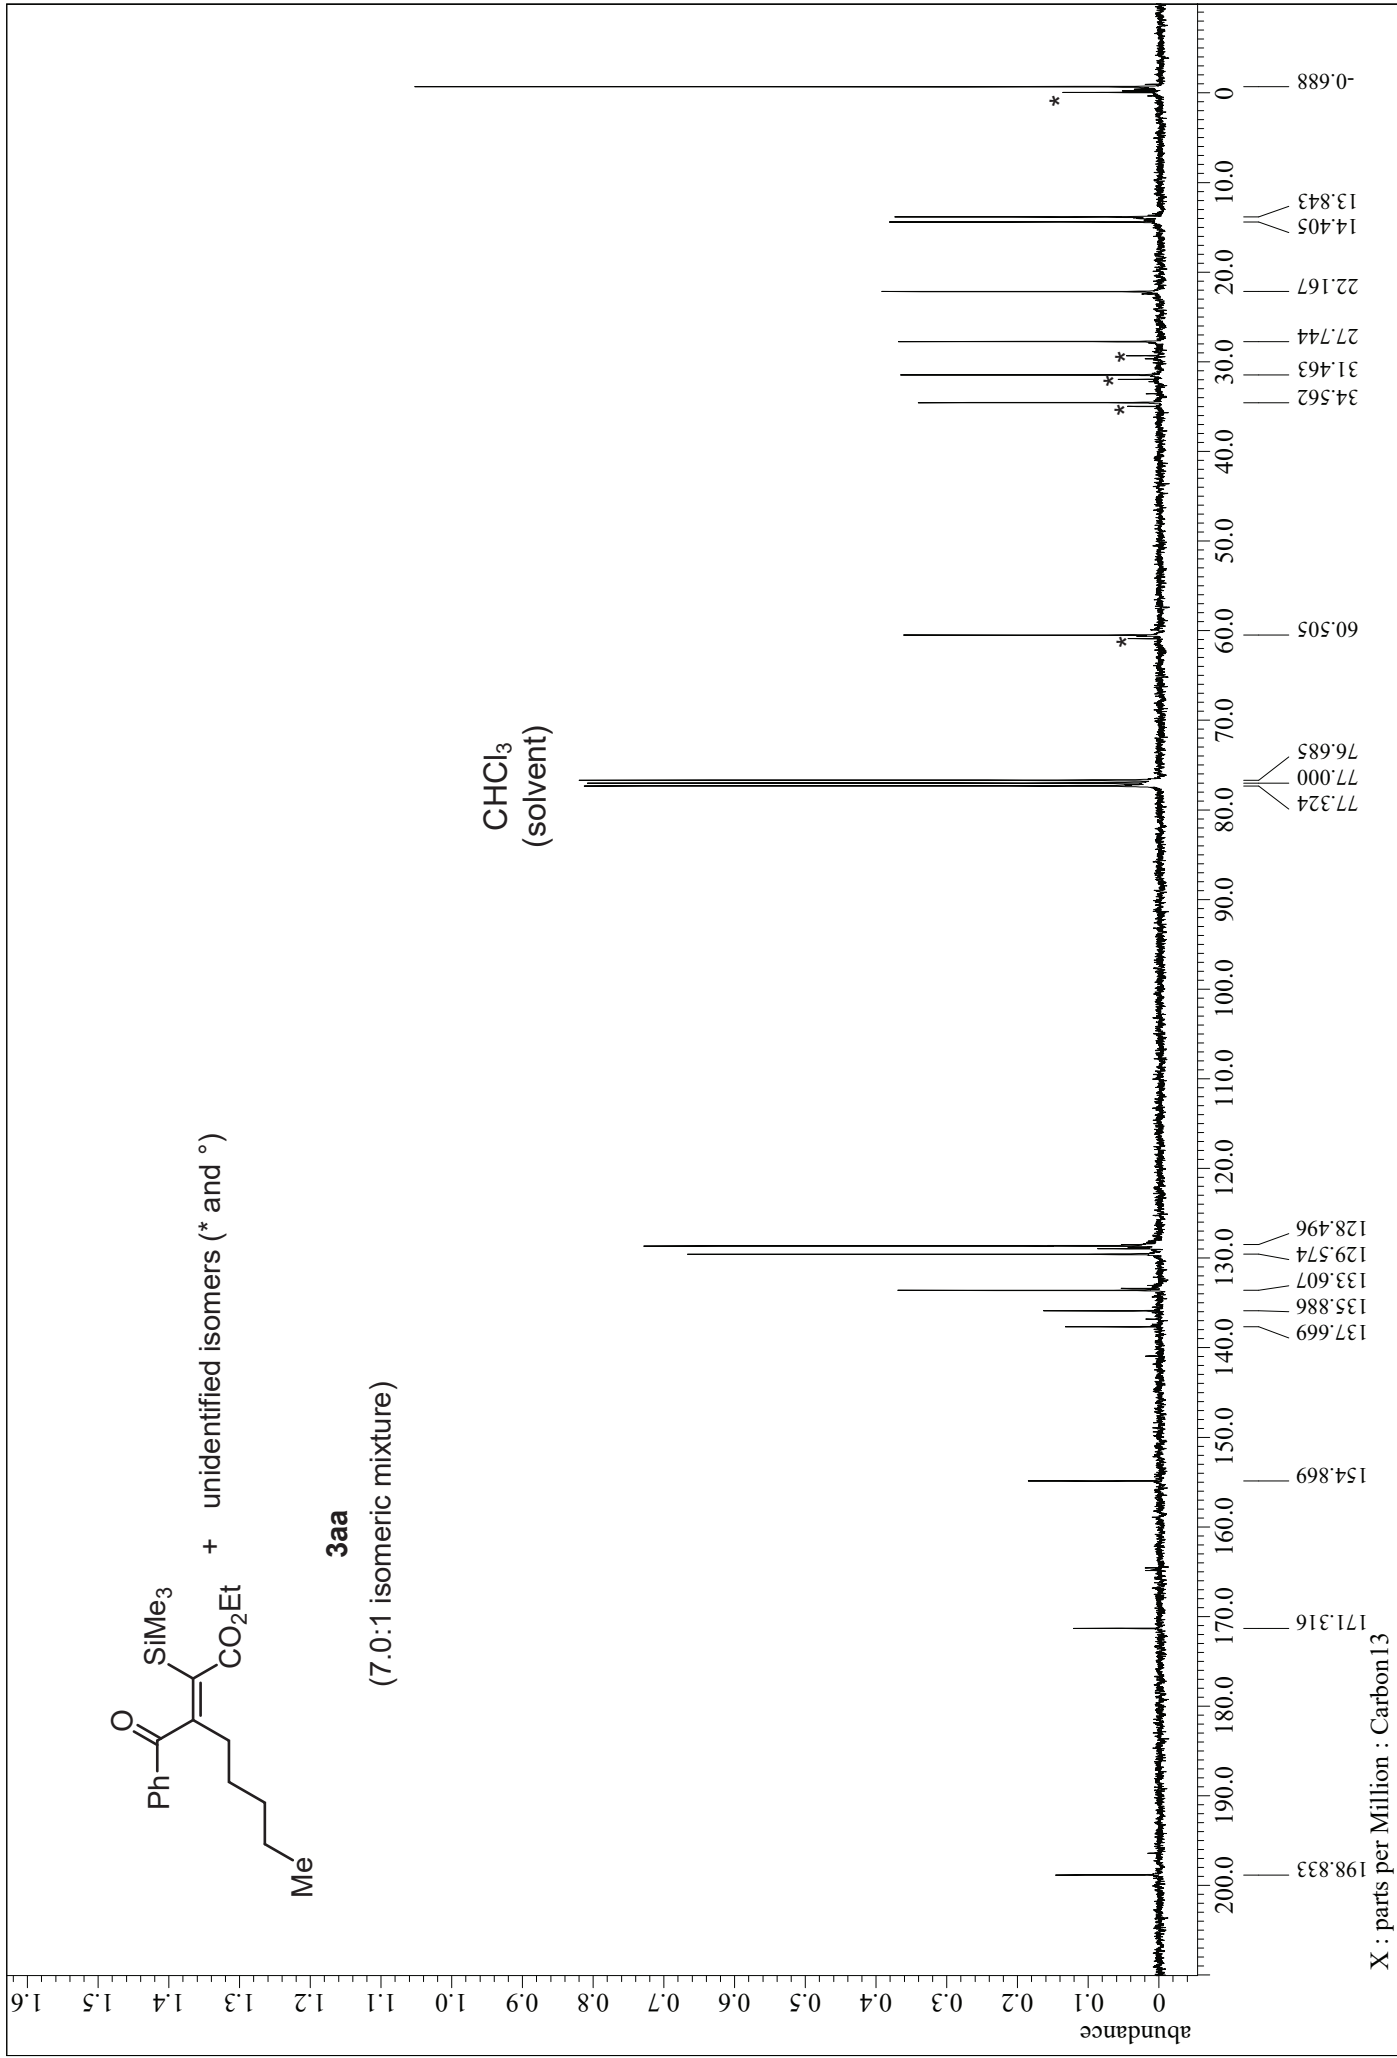

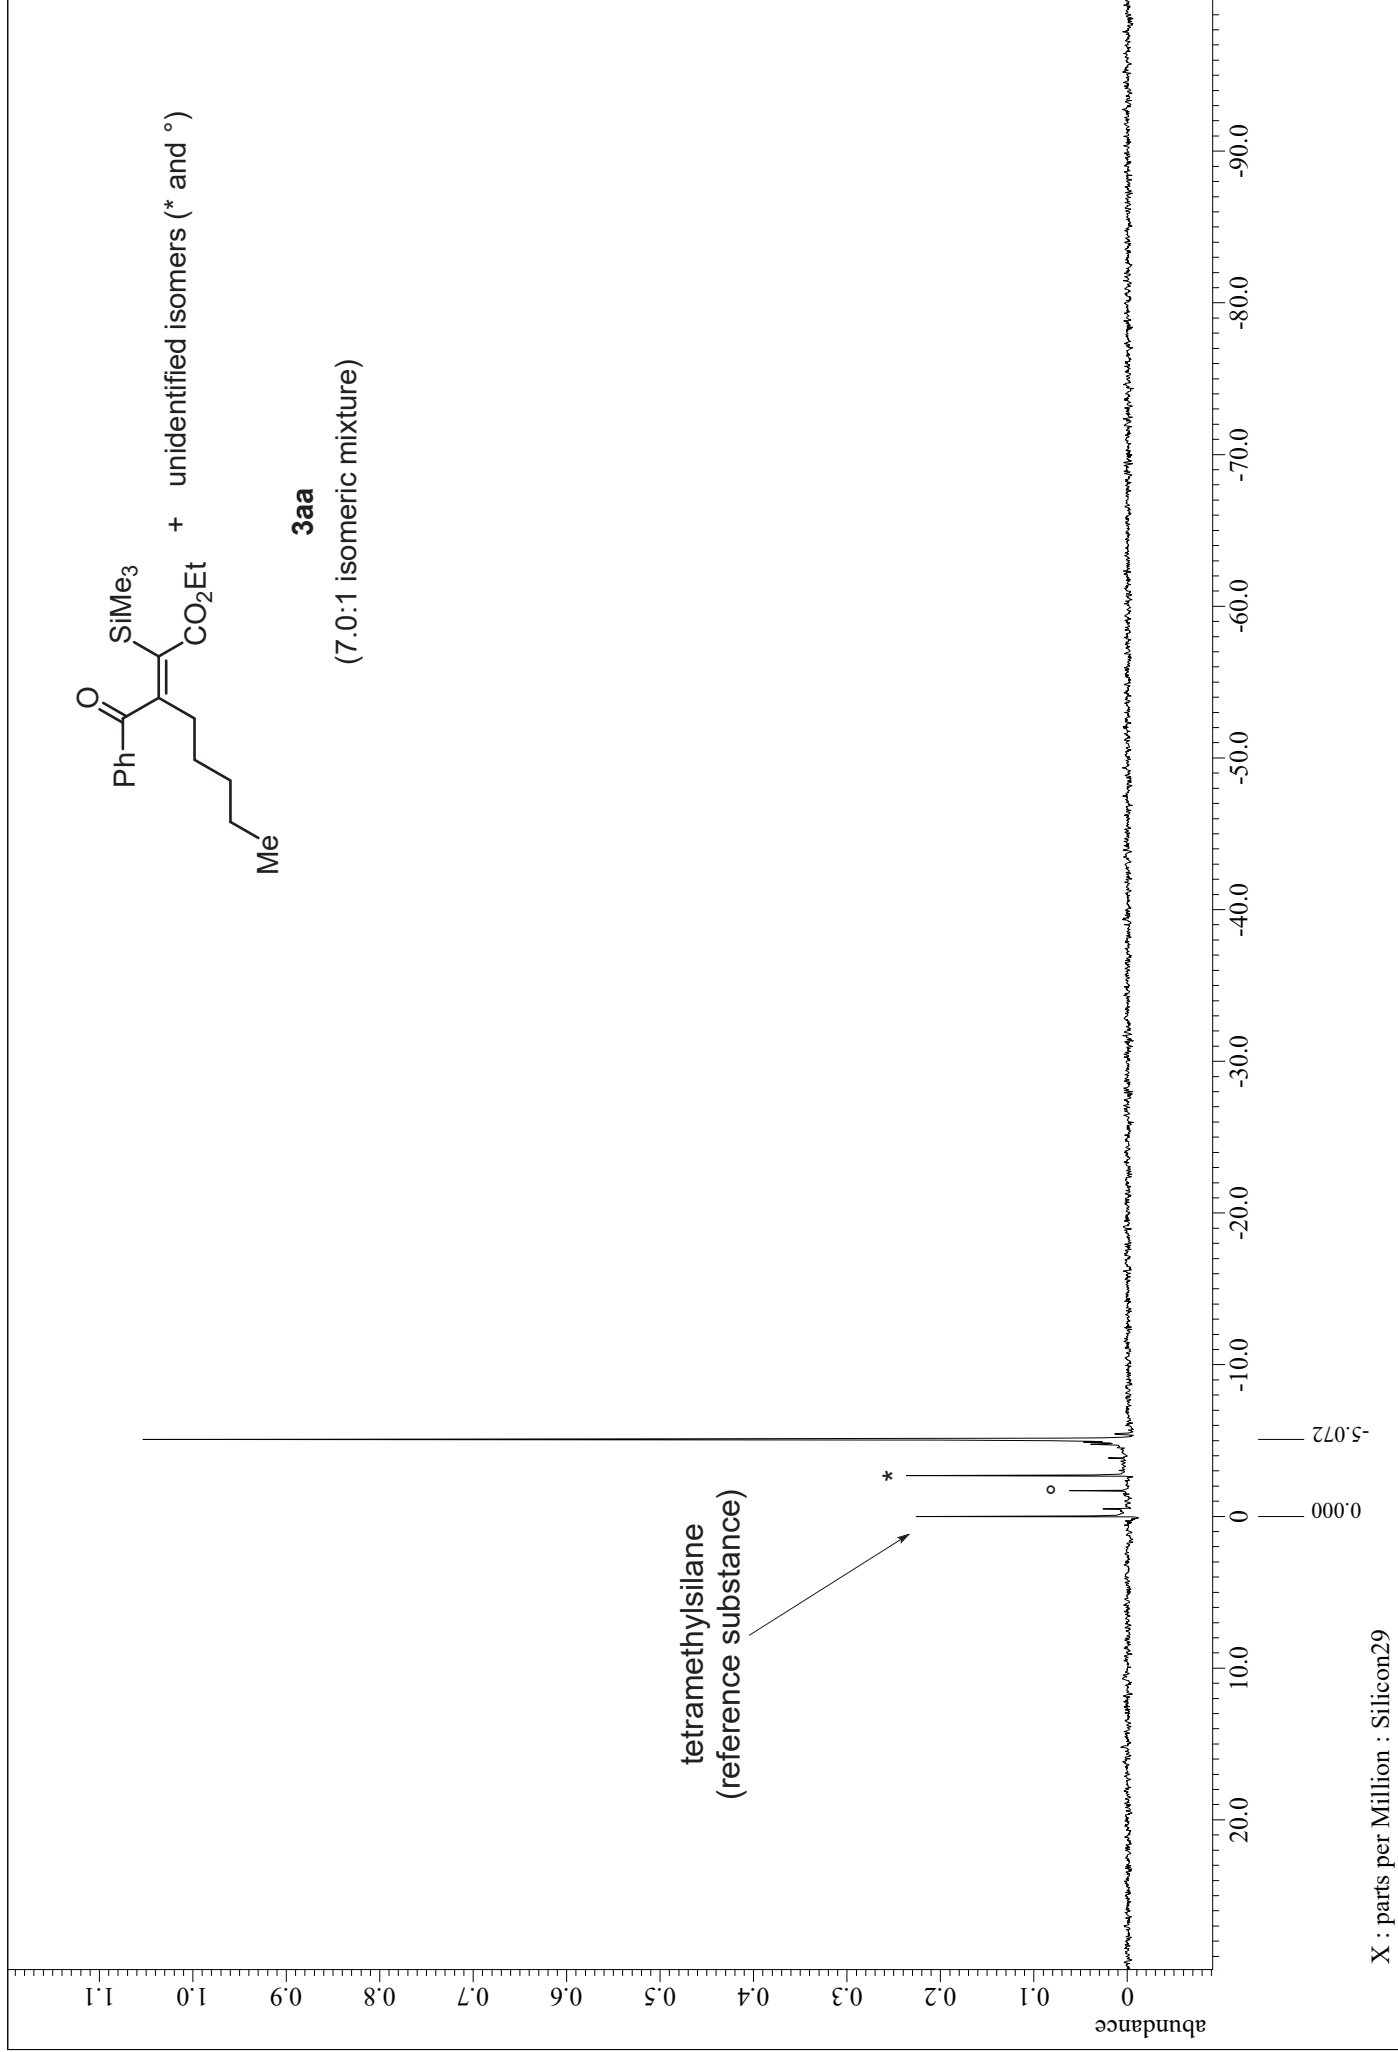

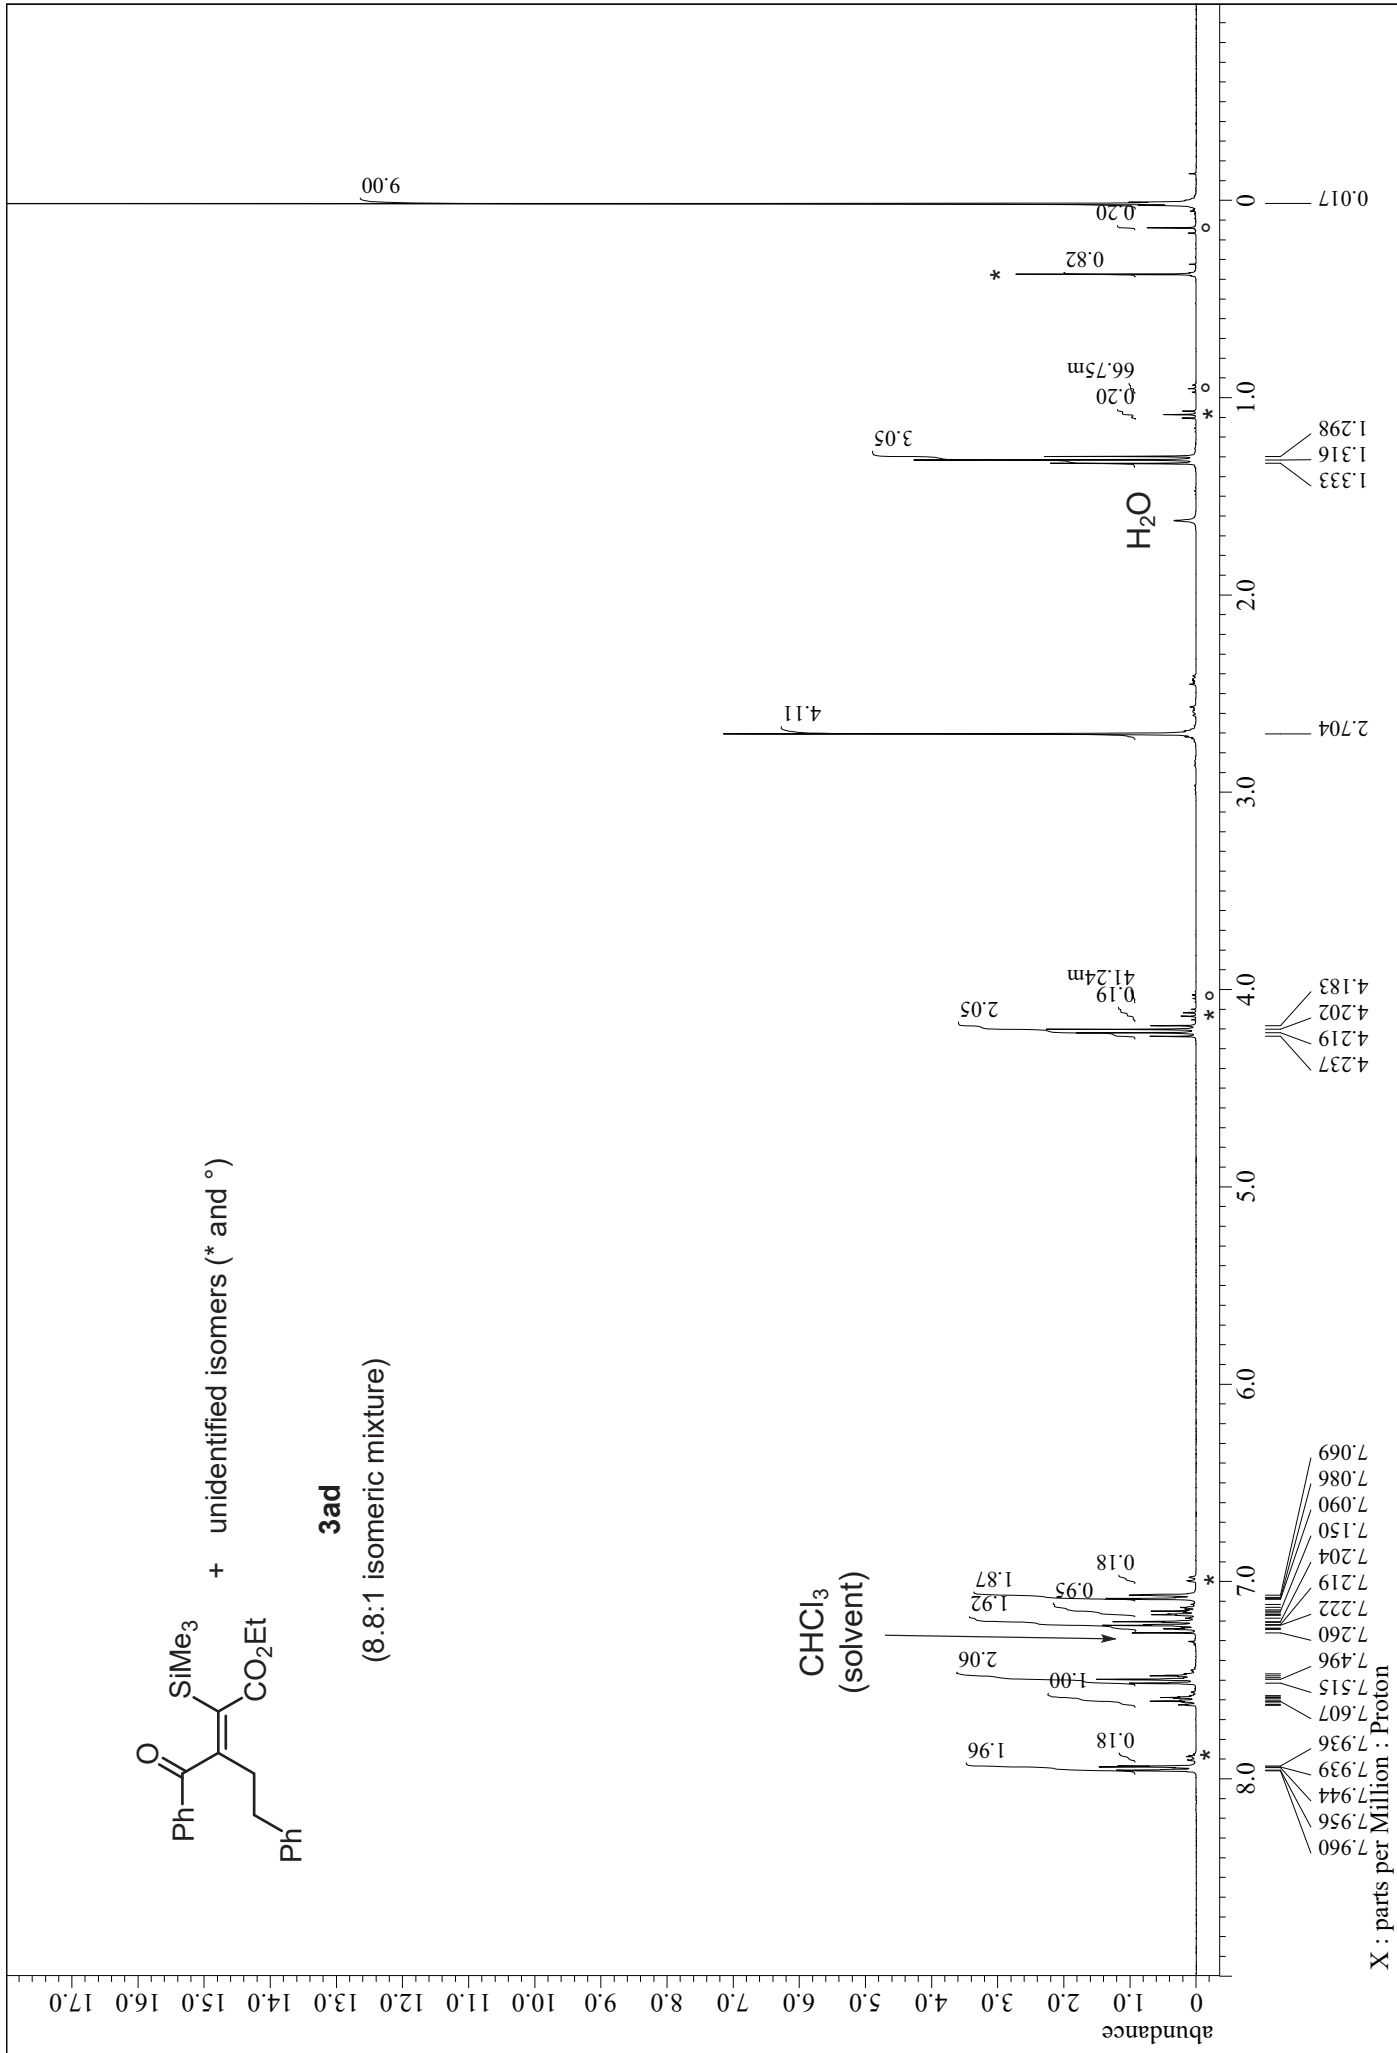

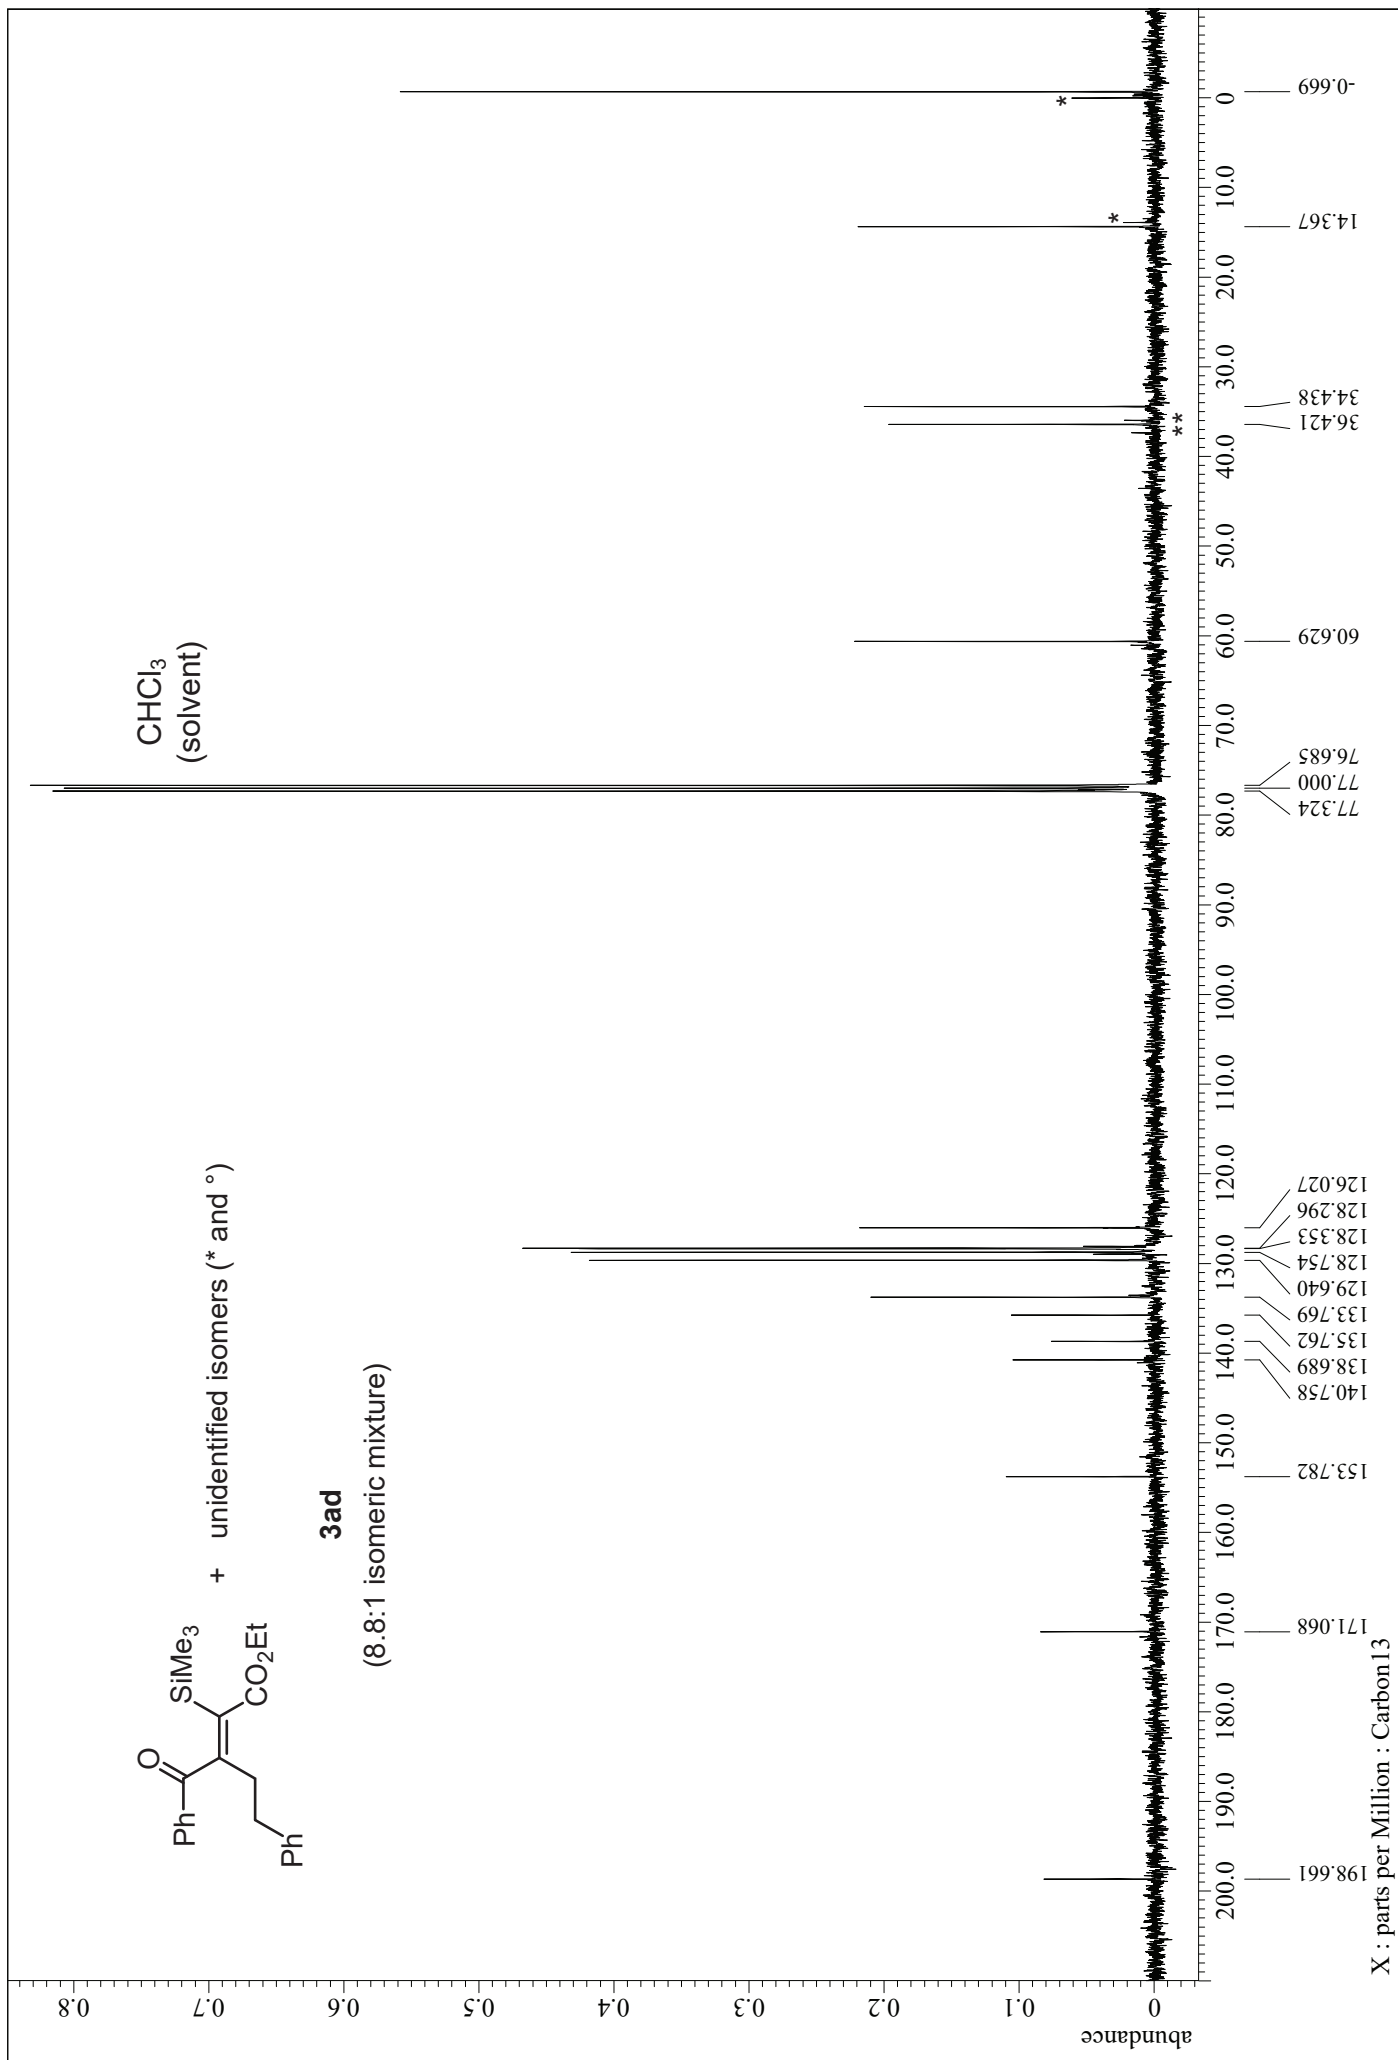



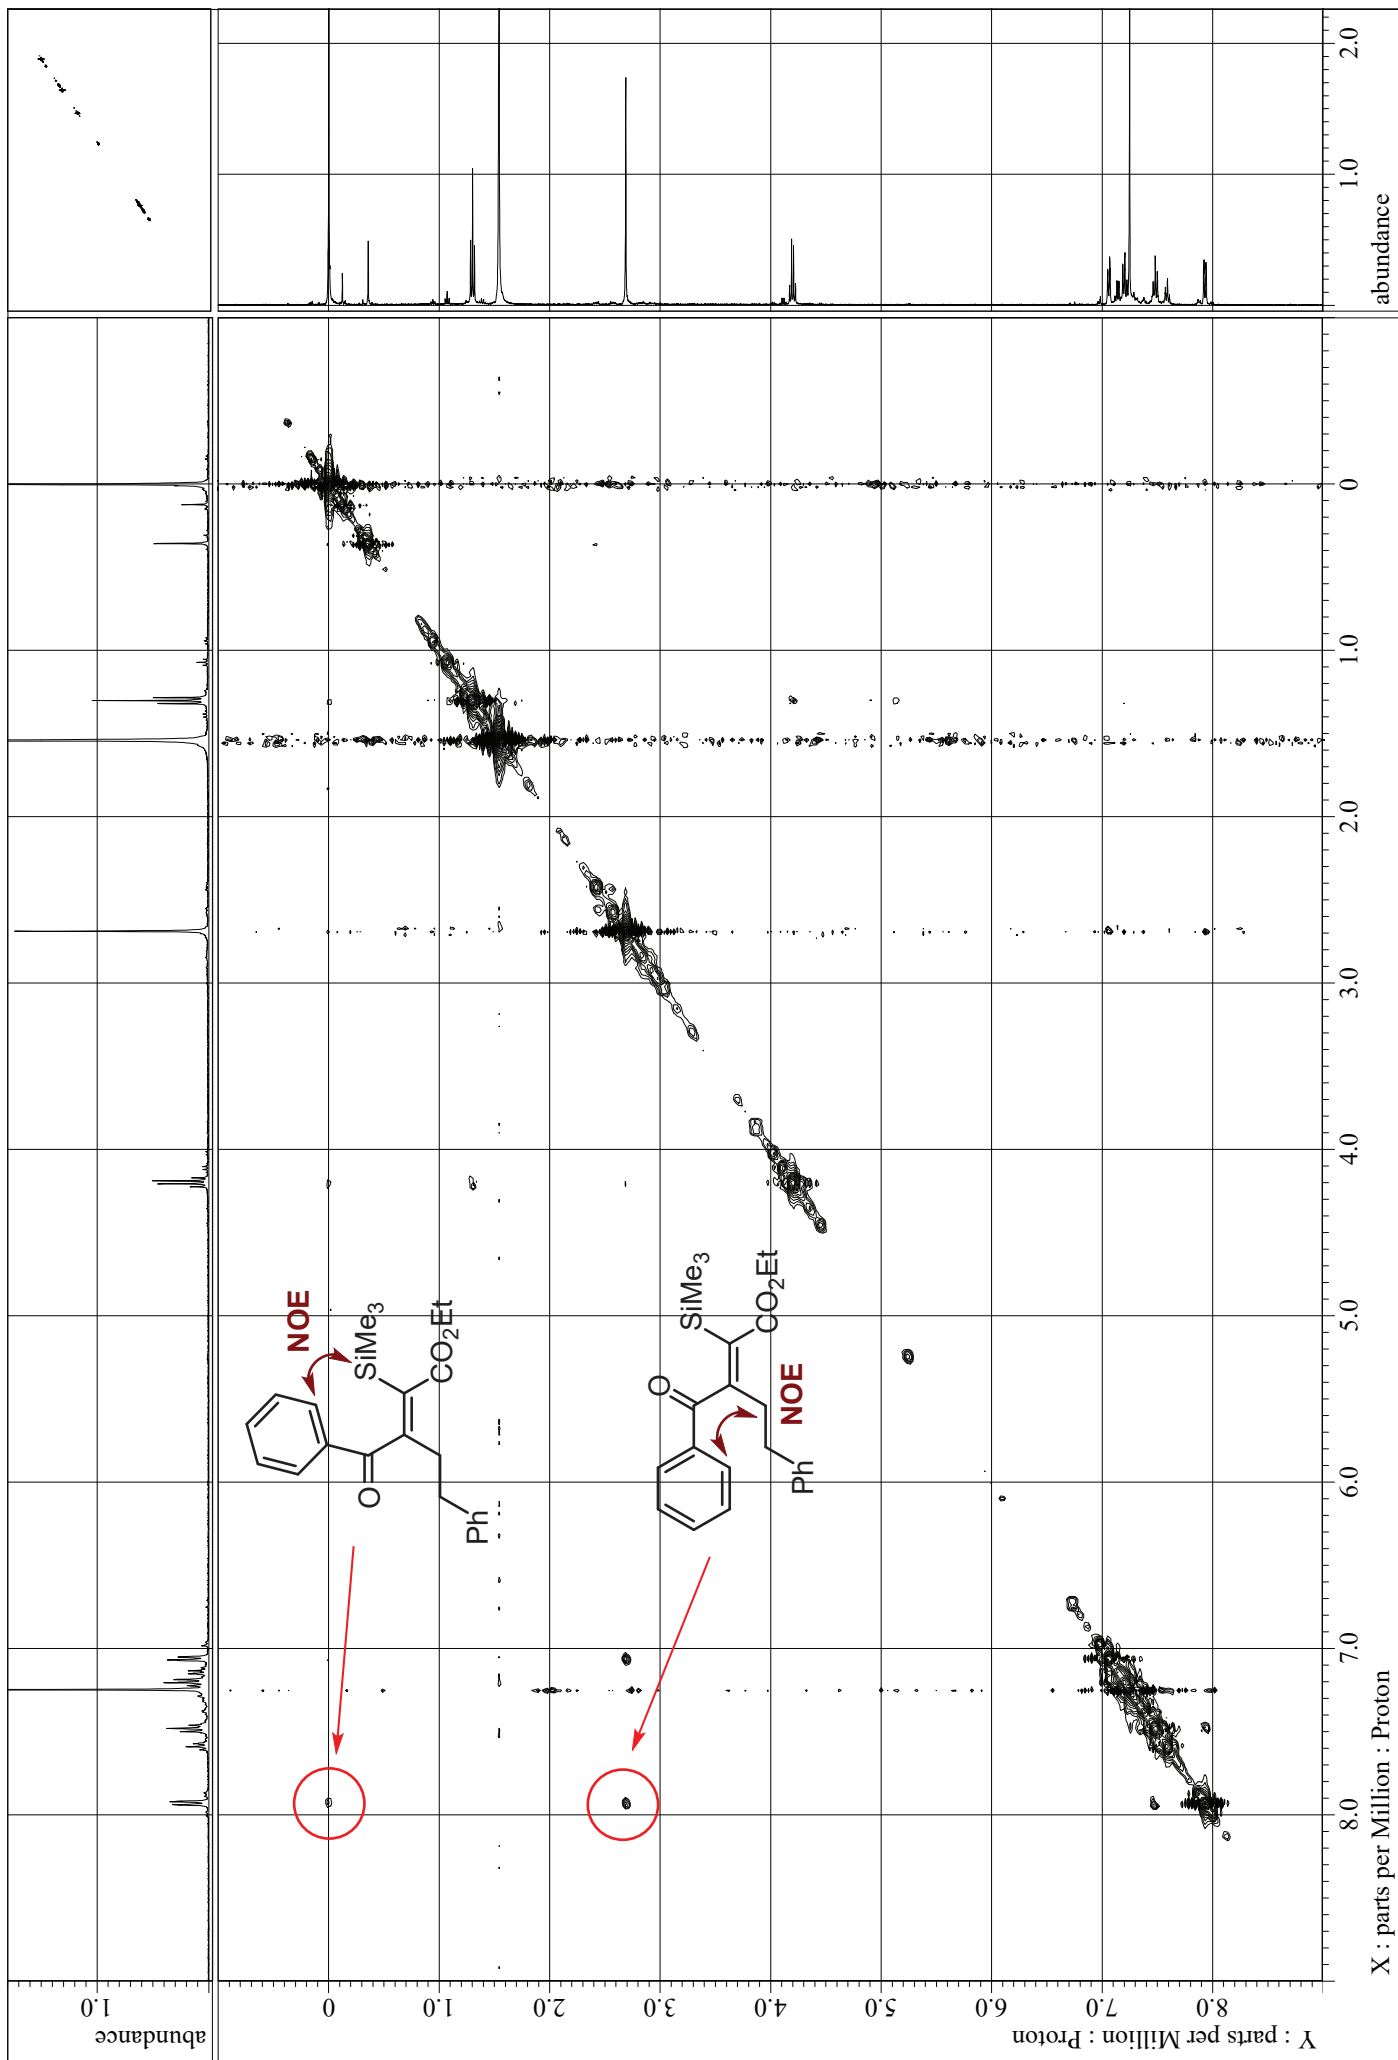

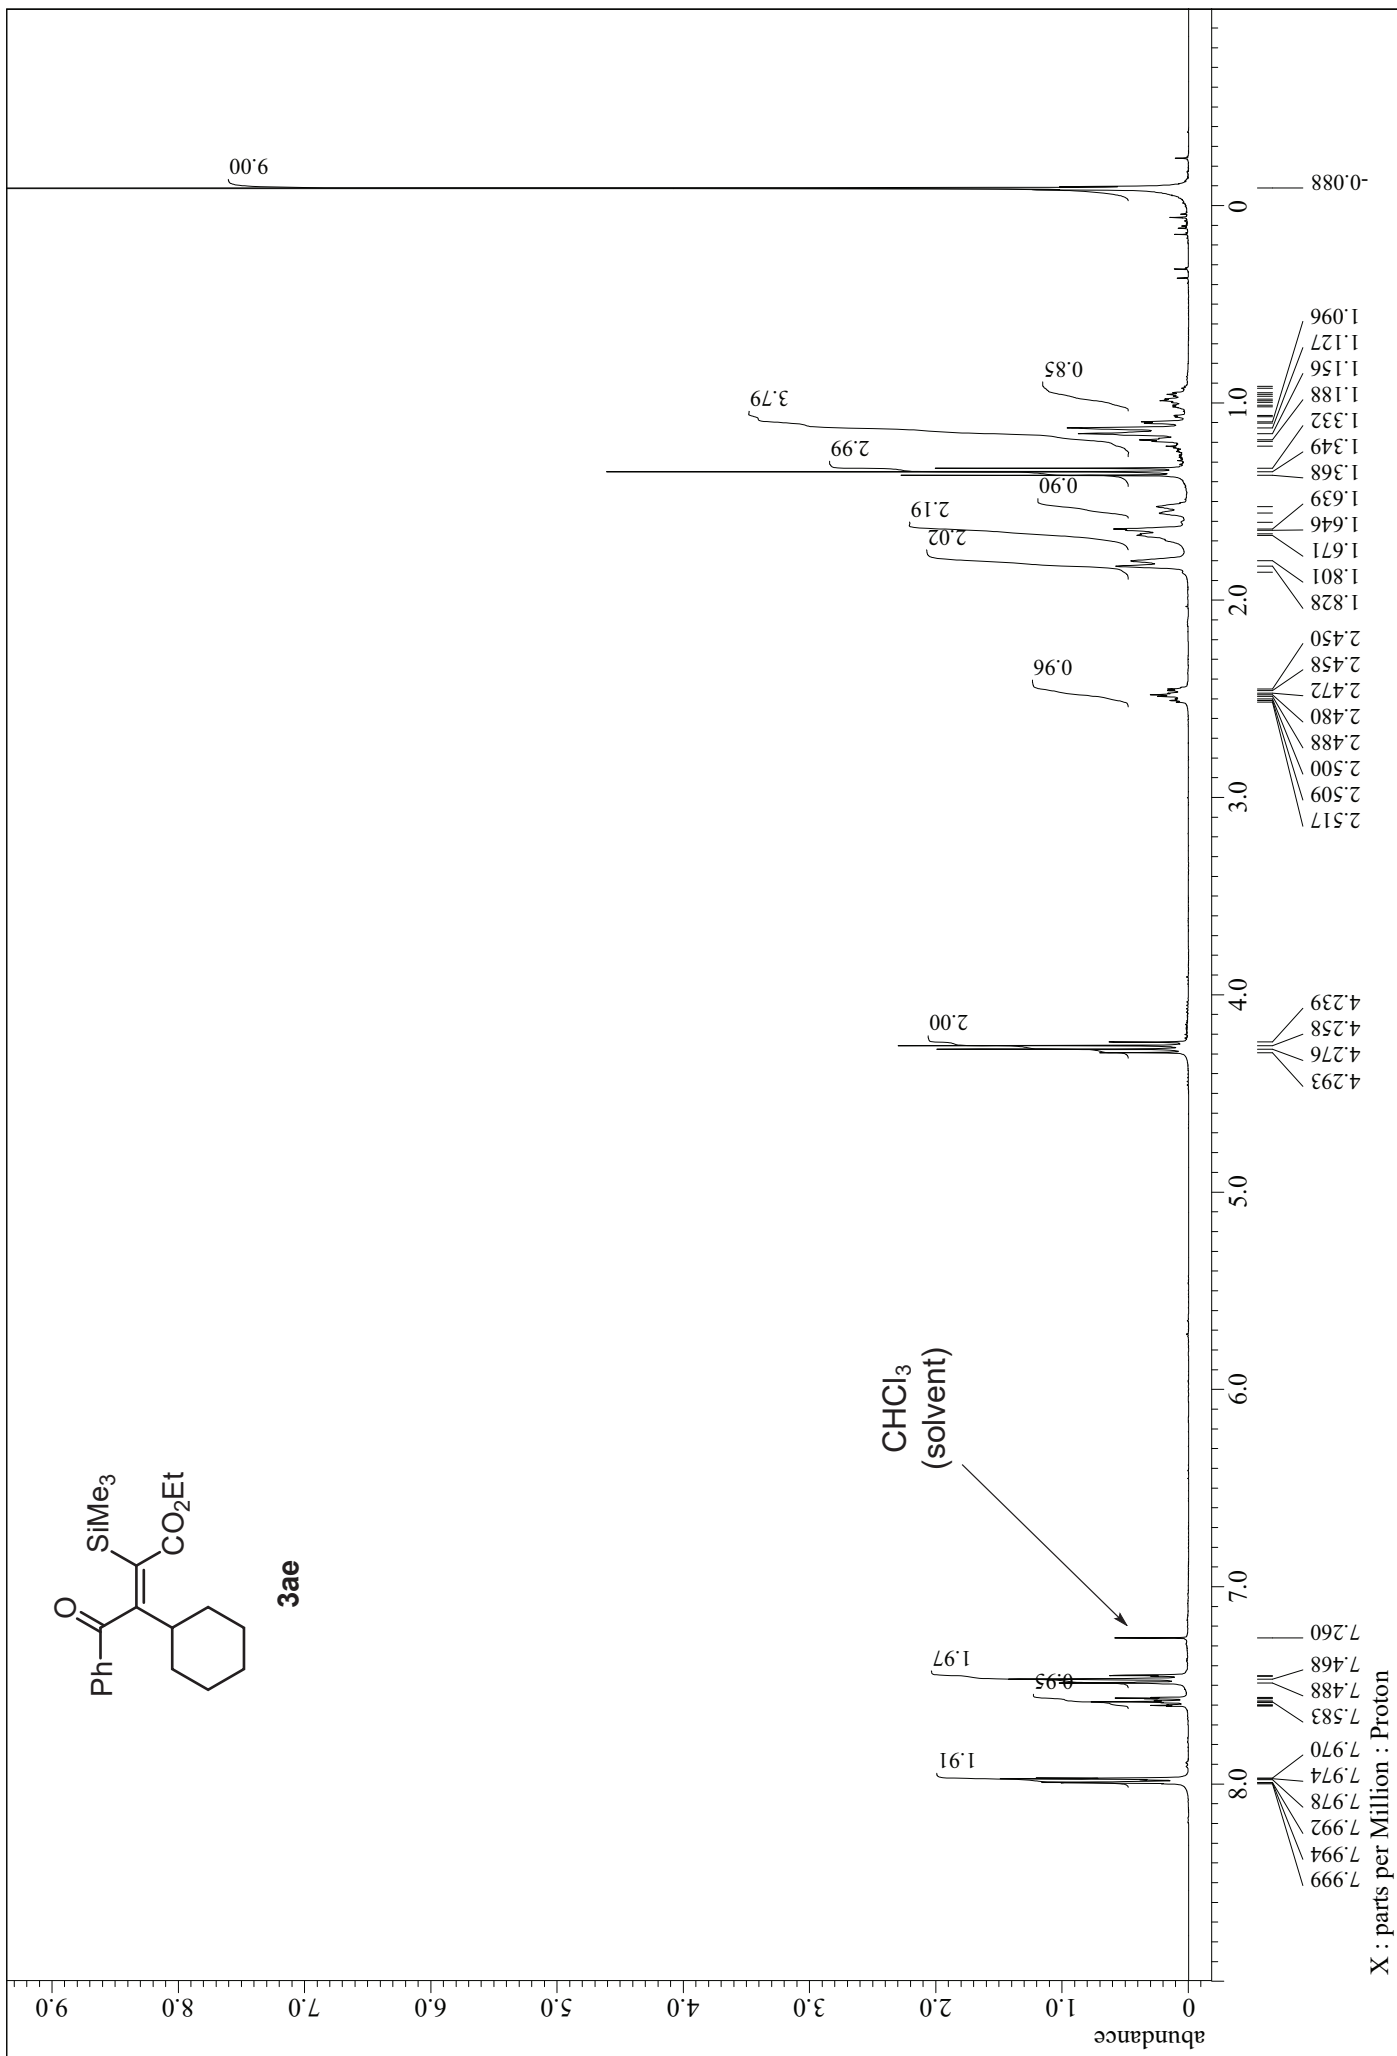

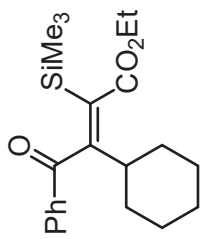

**3ae**

CHCl<sub>3</sub>  
(solvent)

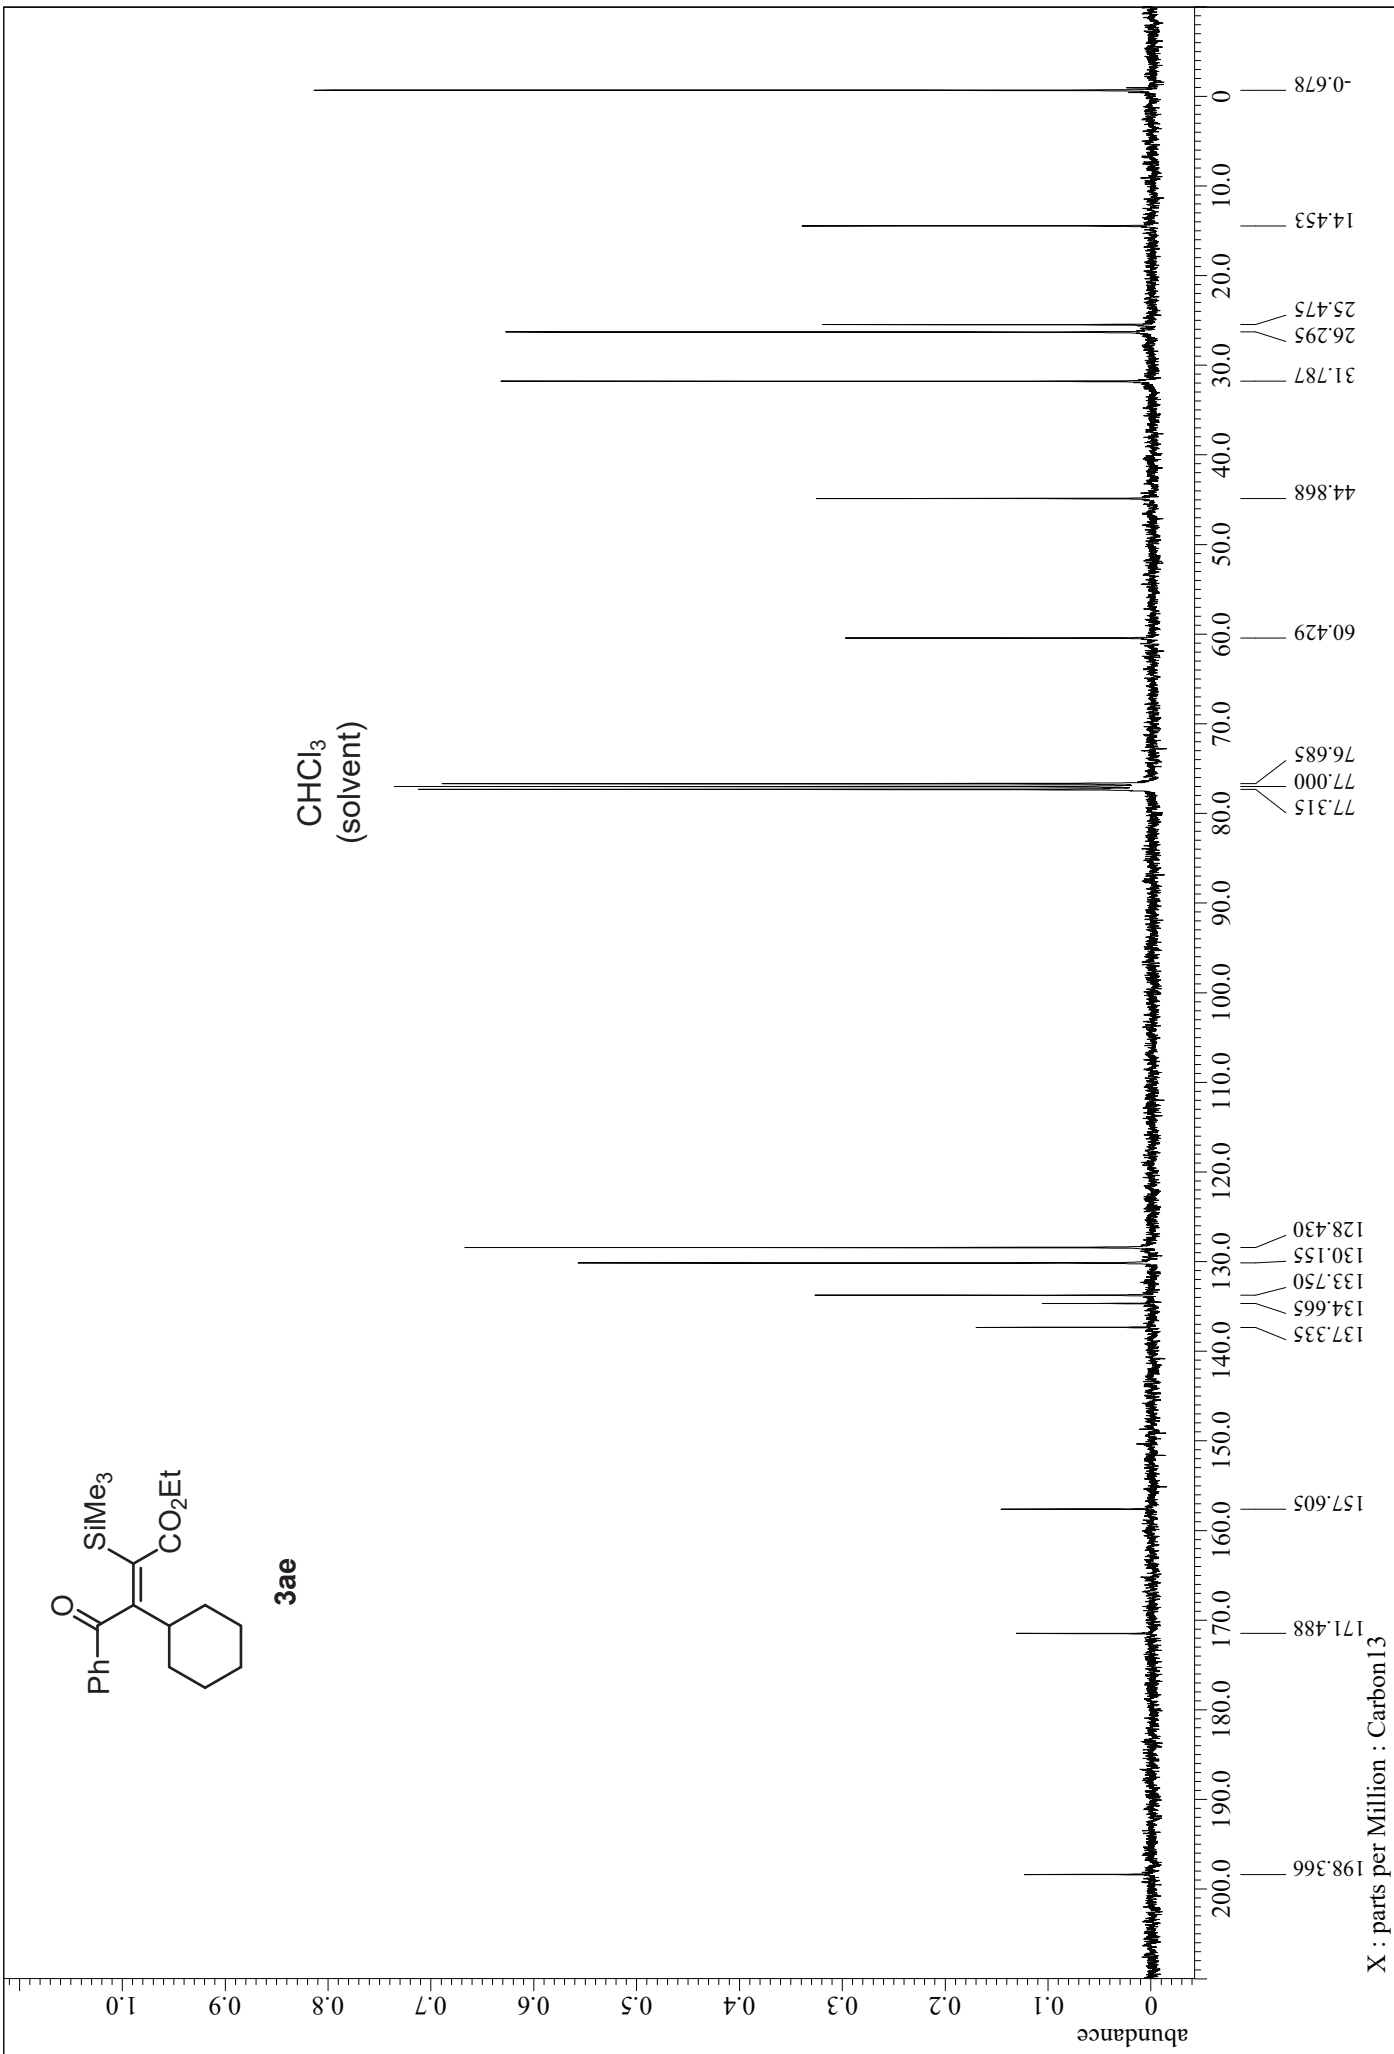

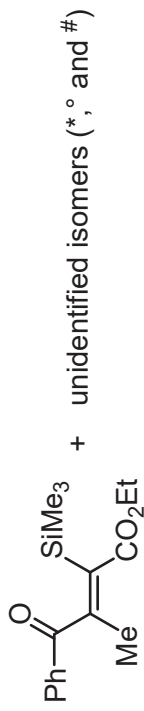

**3af**  
(7.3:1 isomeric mixture)

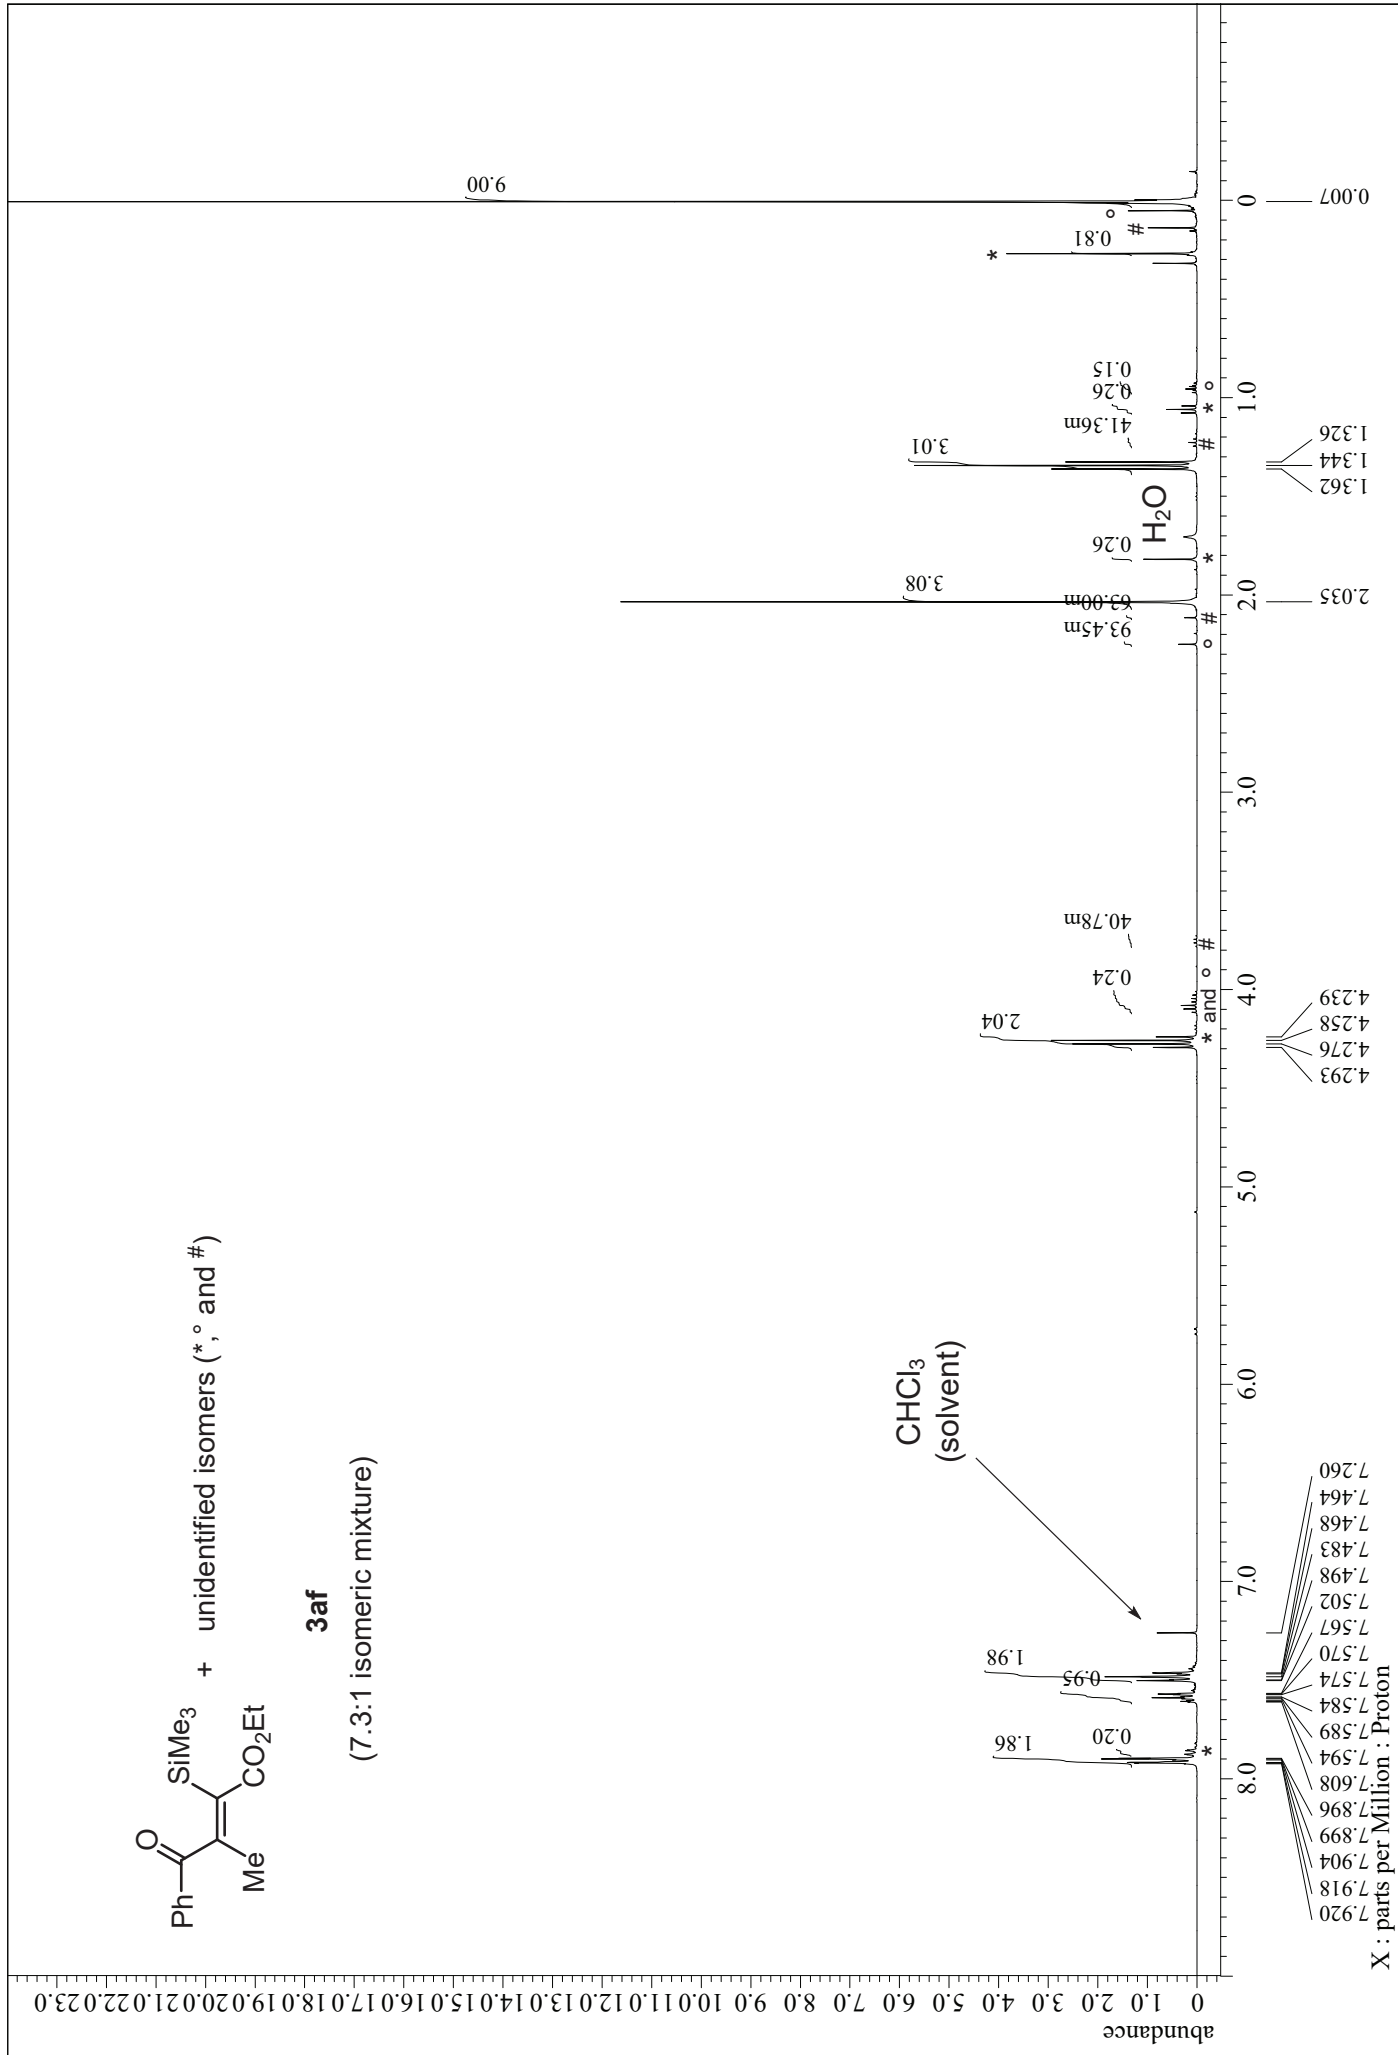

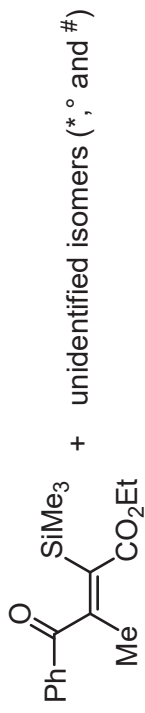

**3af**  
 (7.3:1 isomeric mixture)

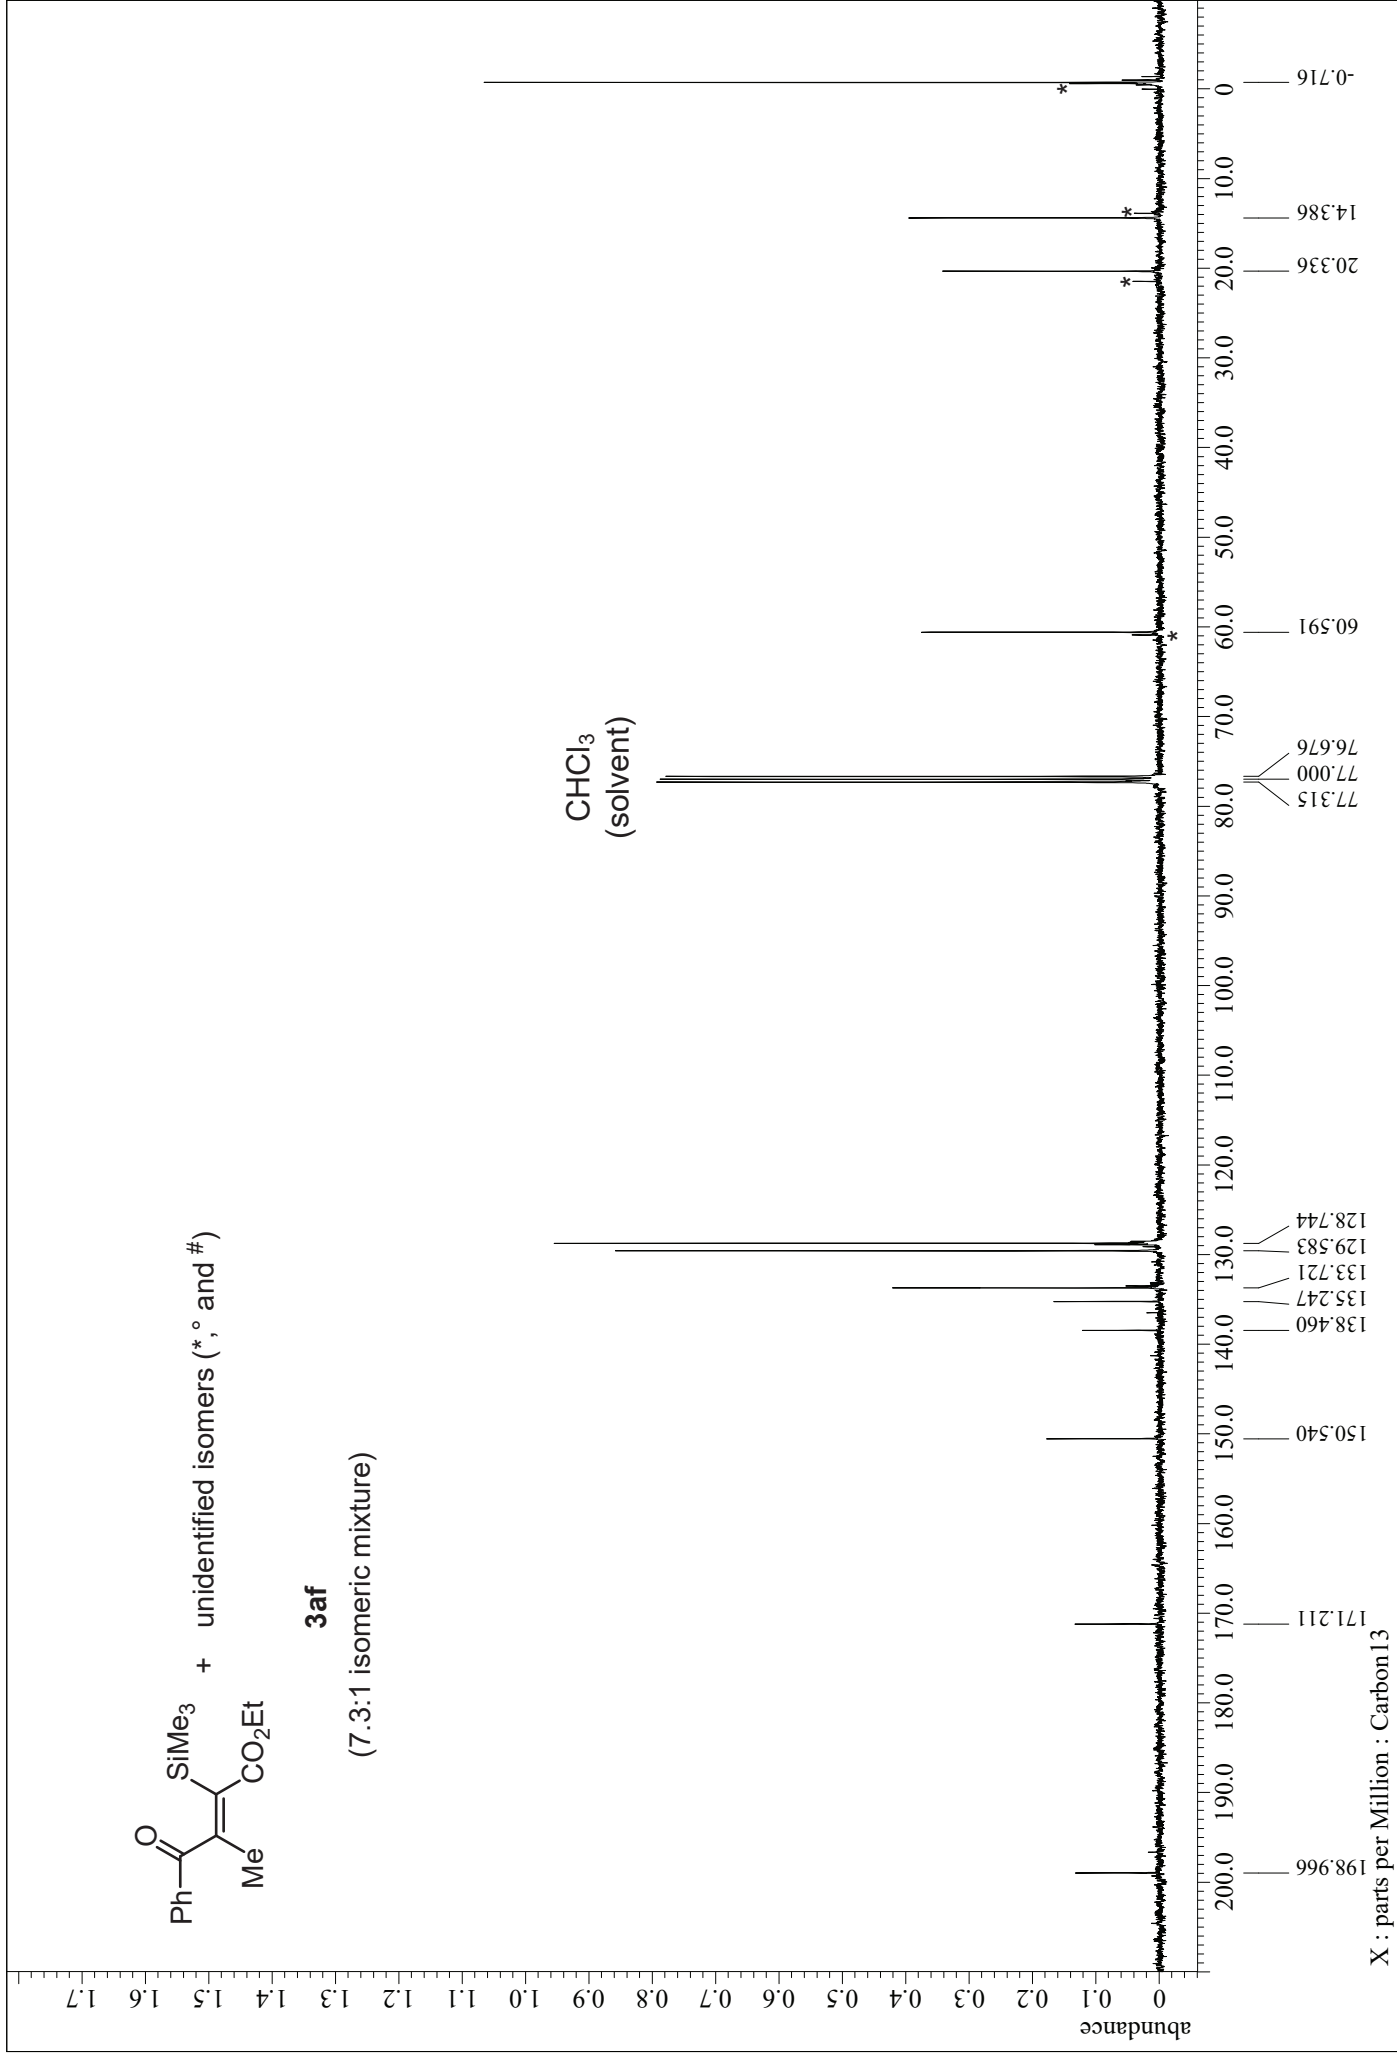

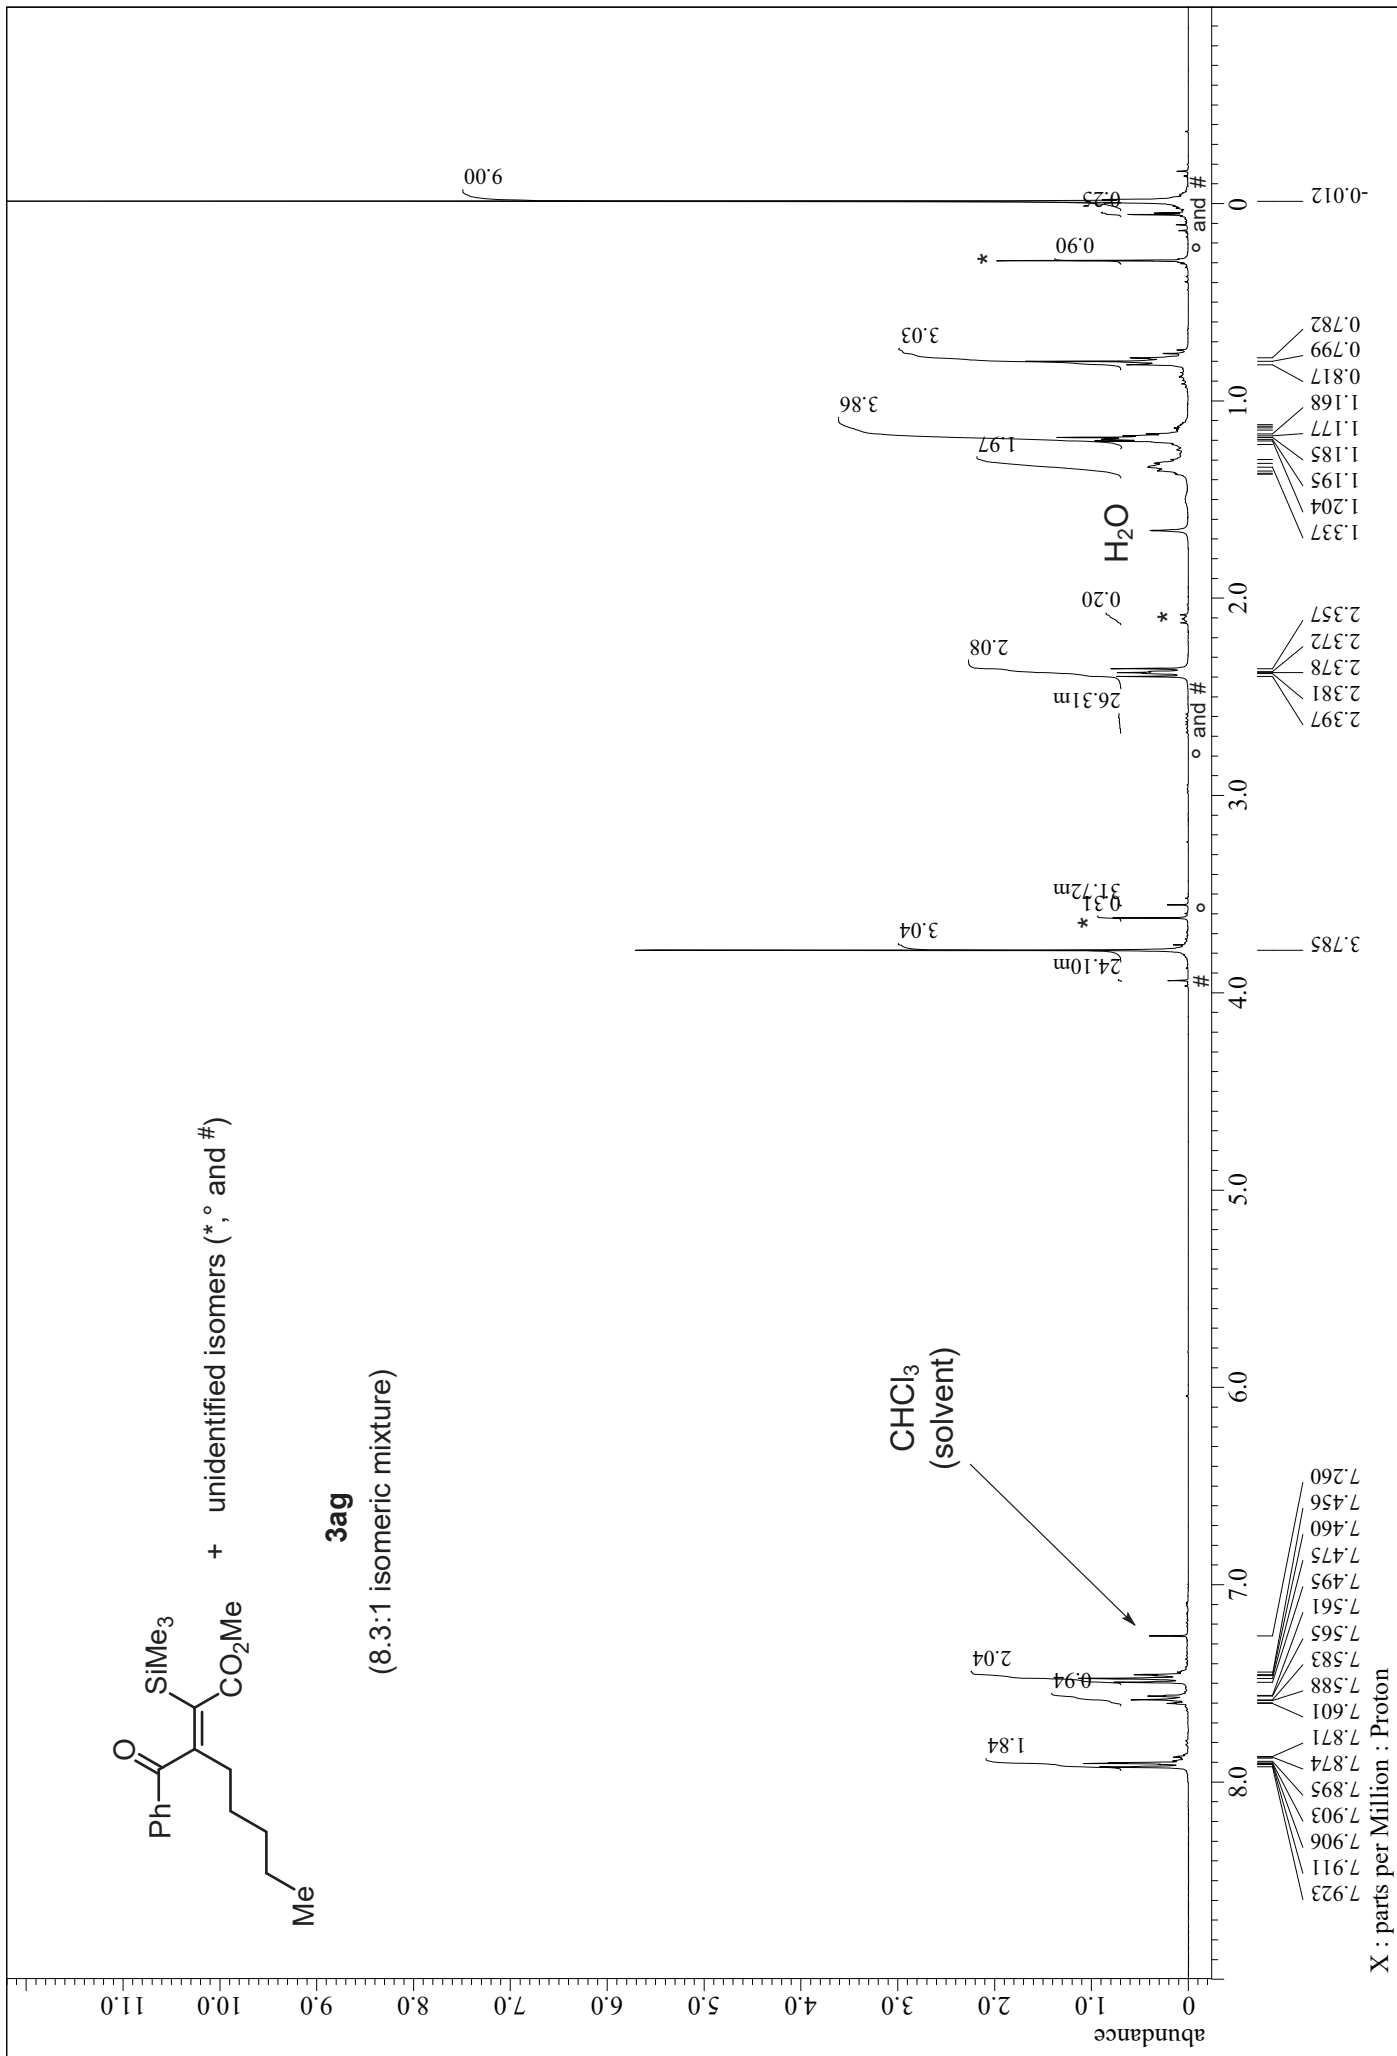

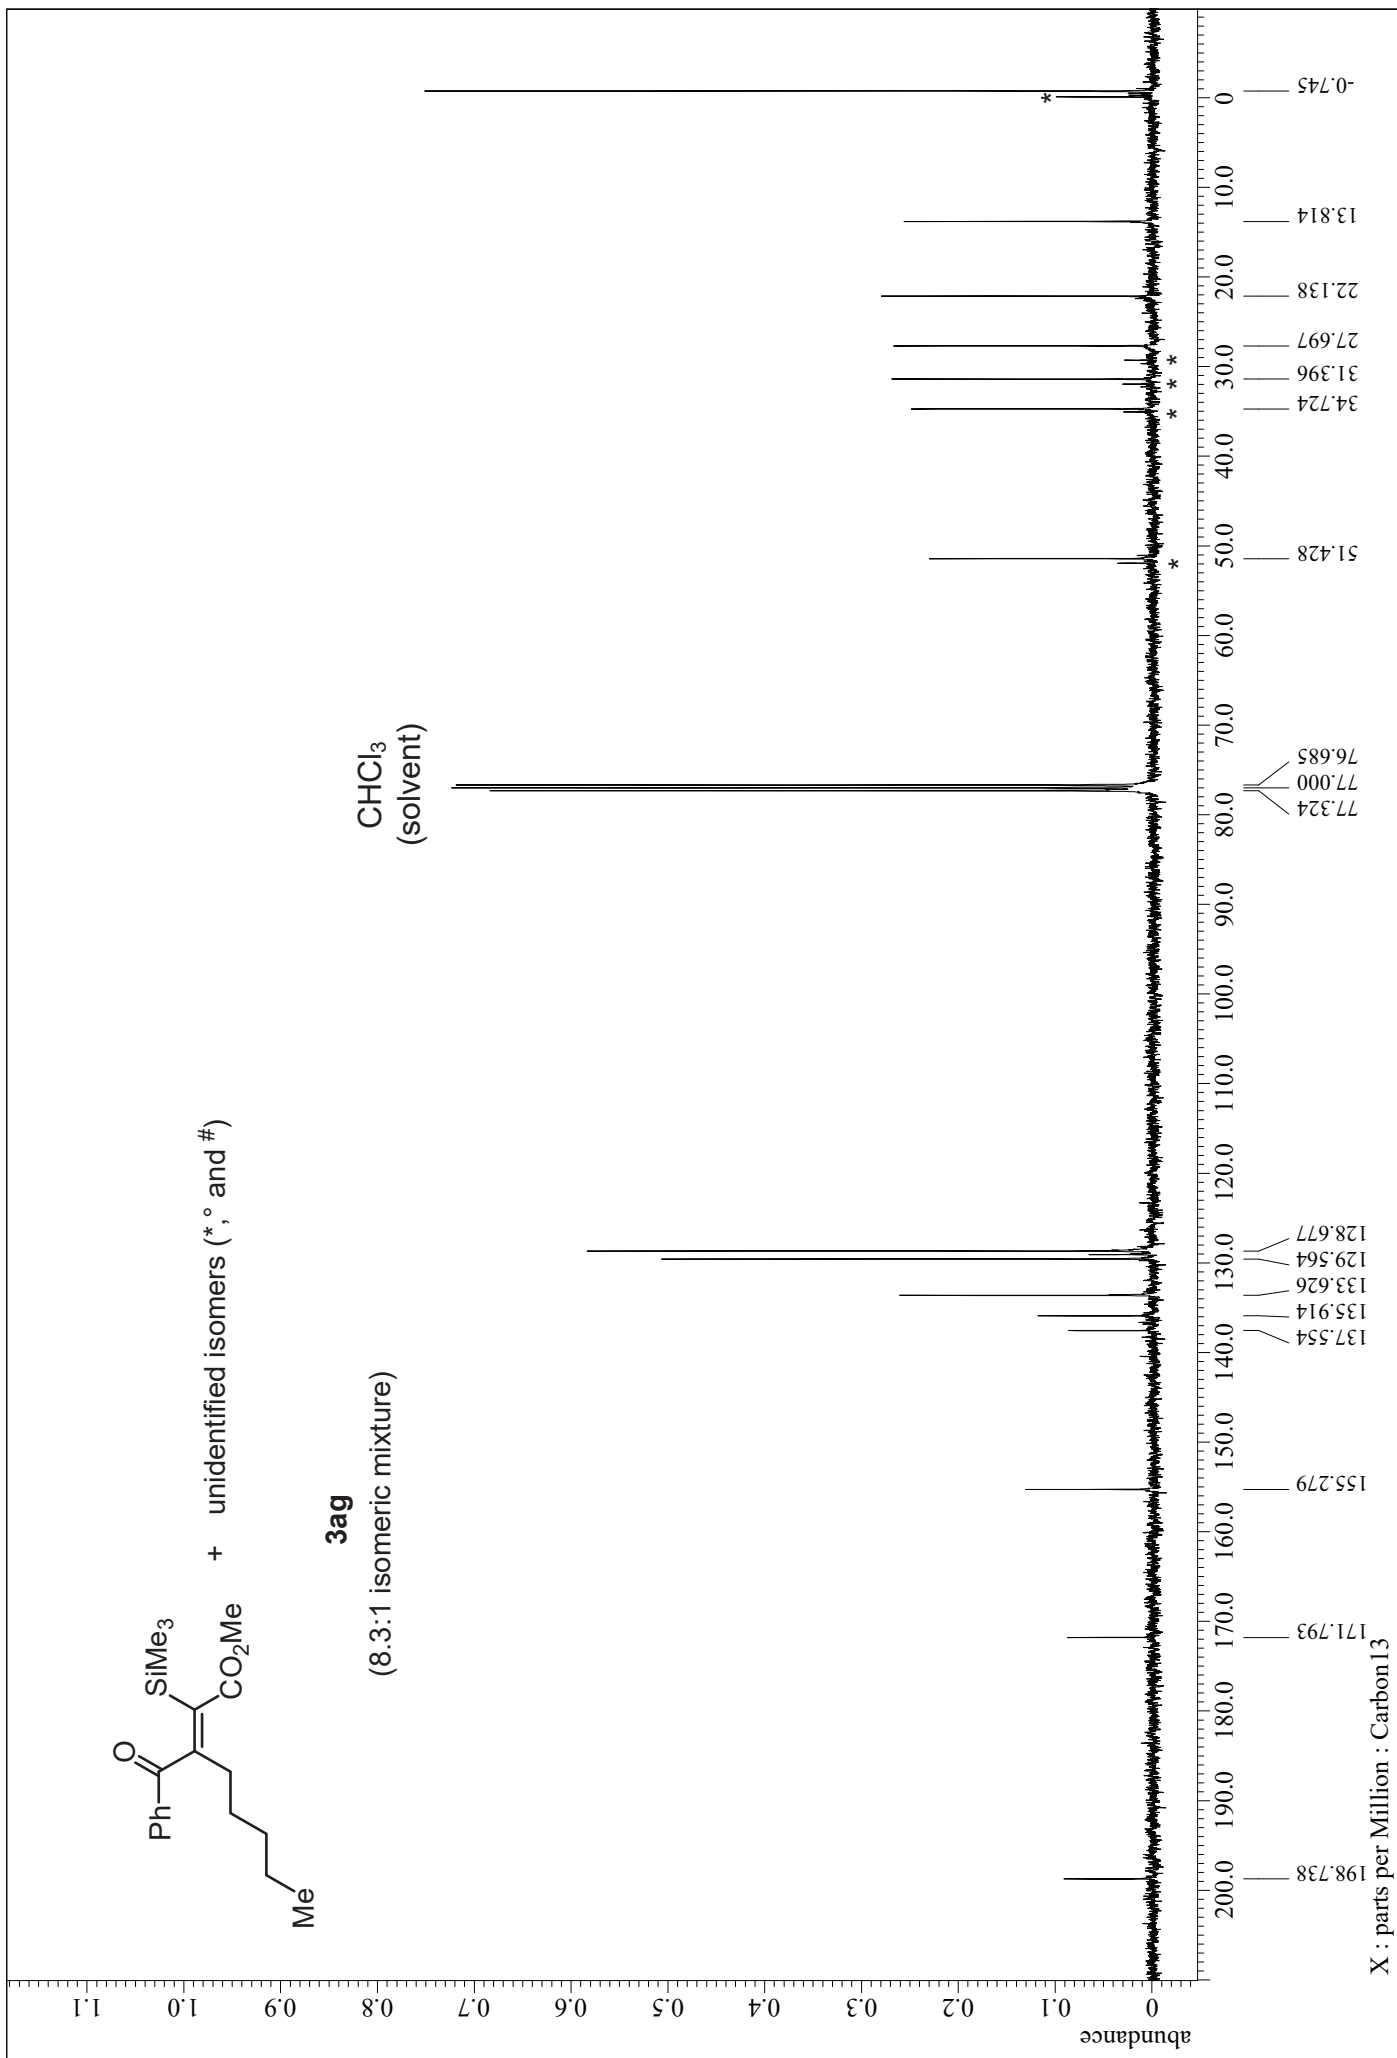

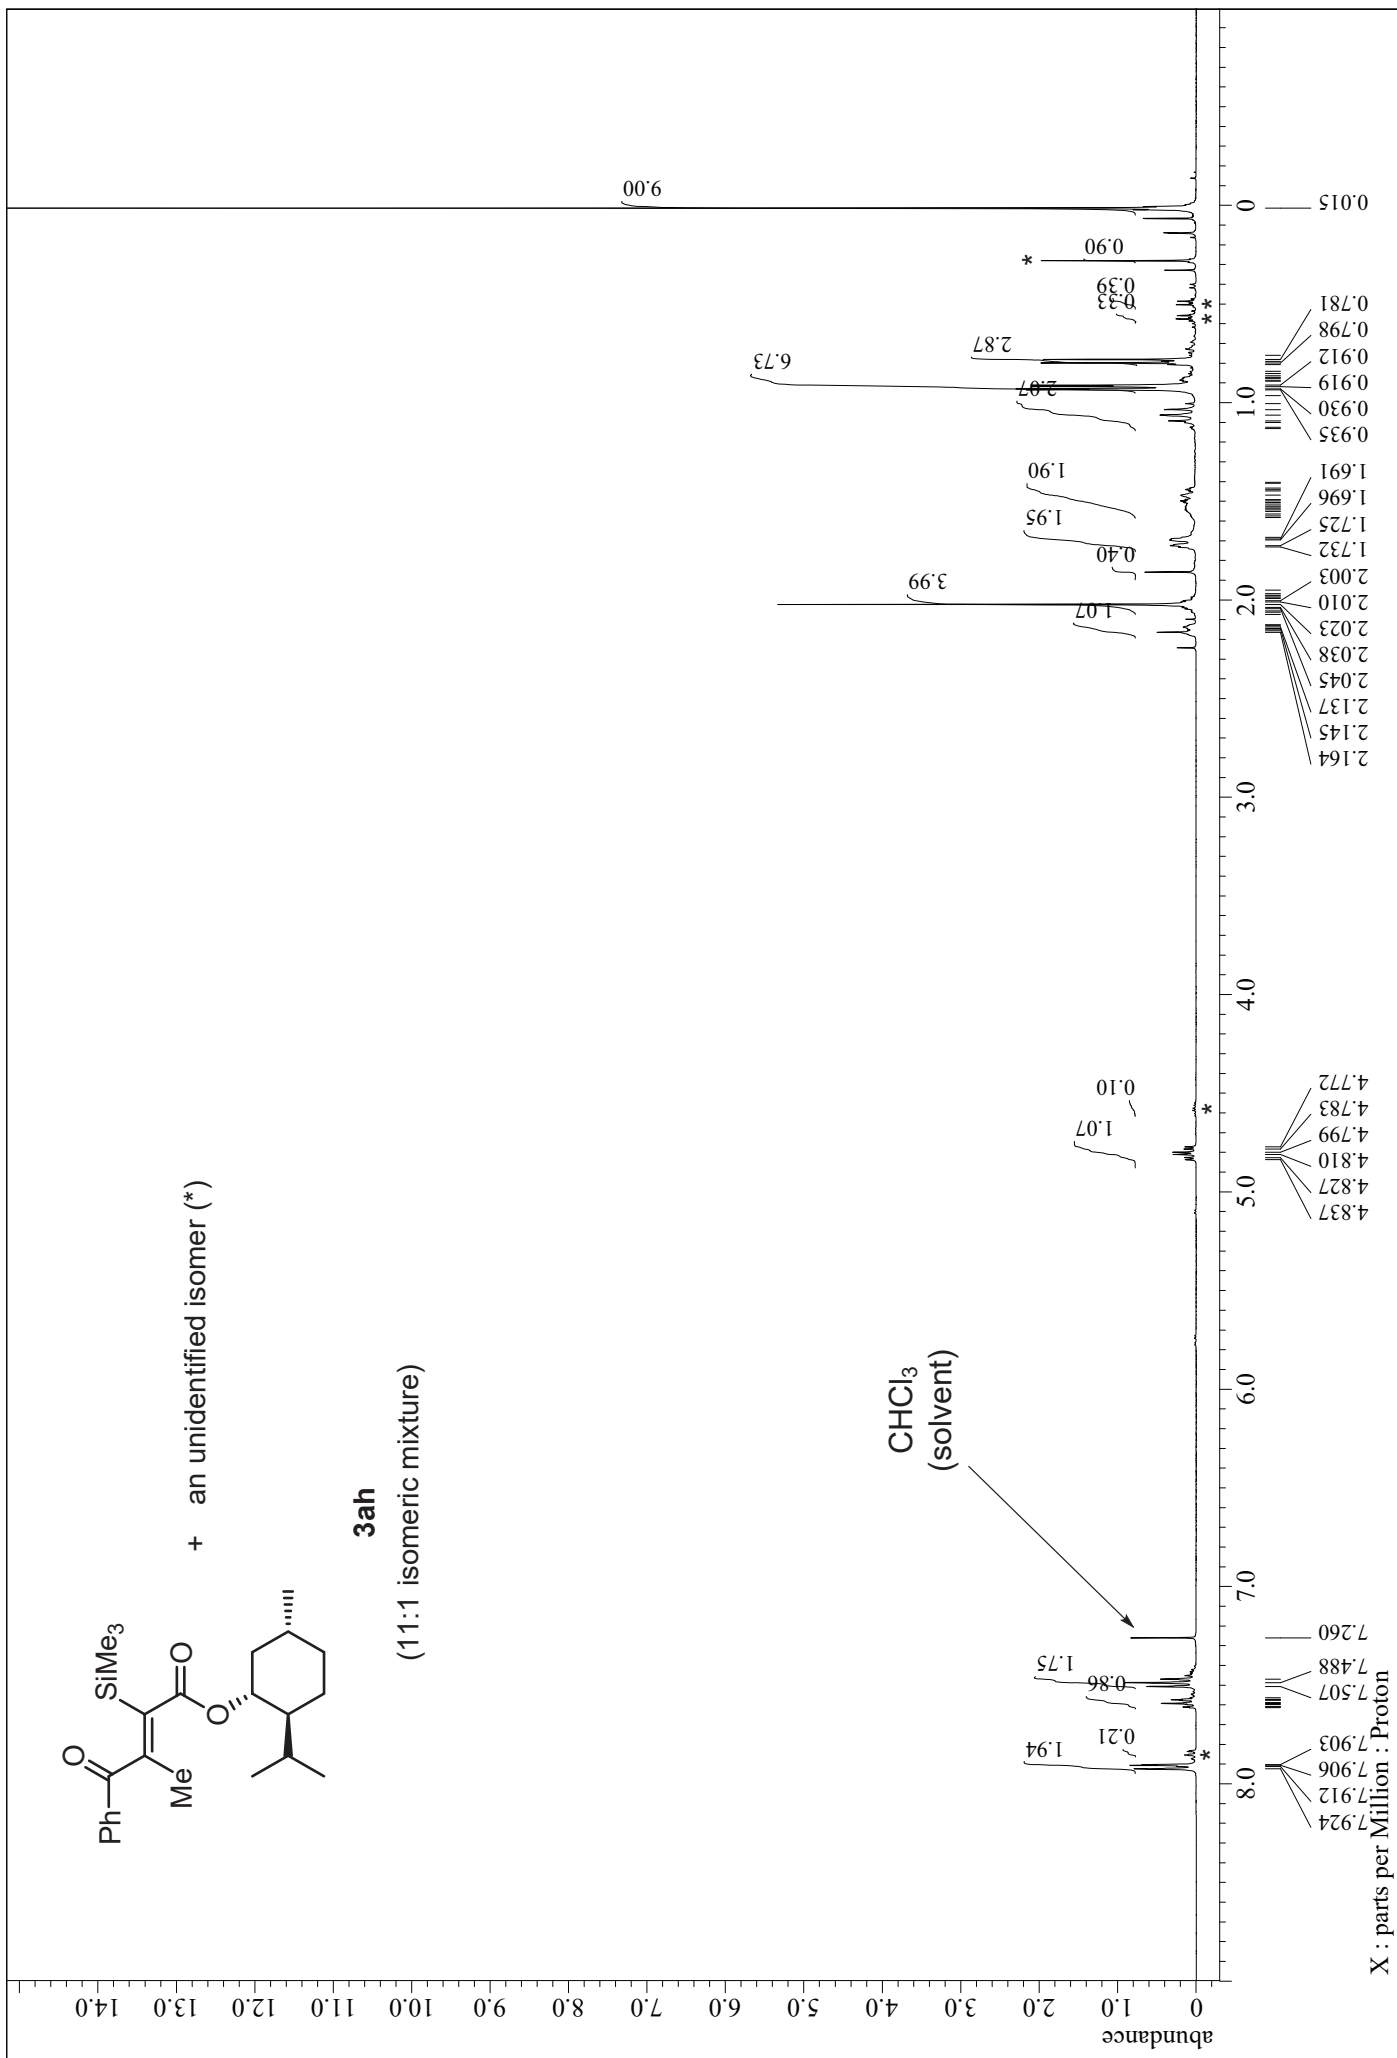



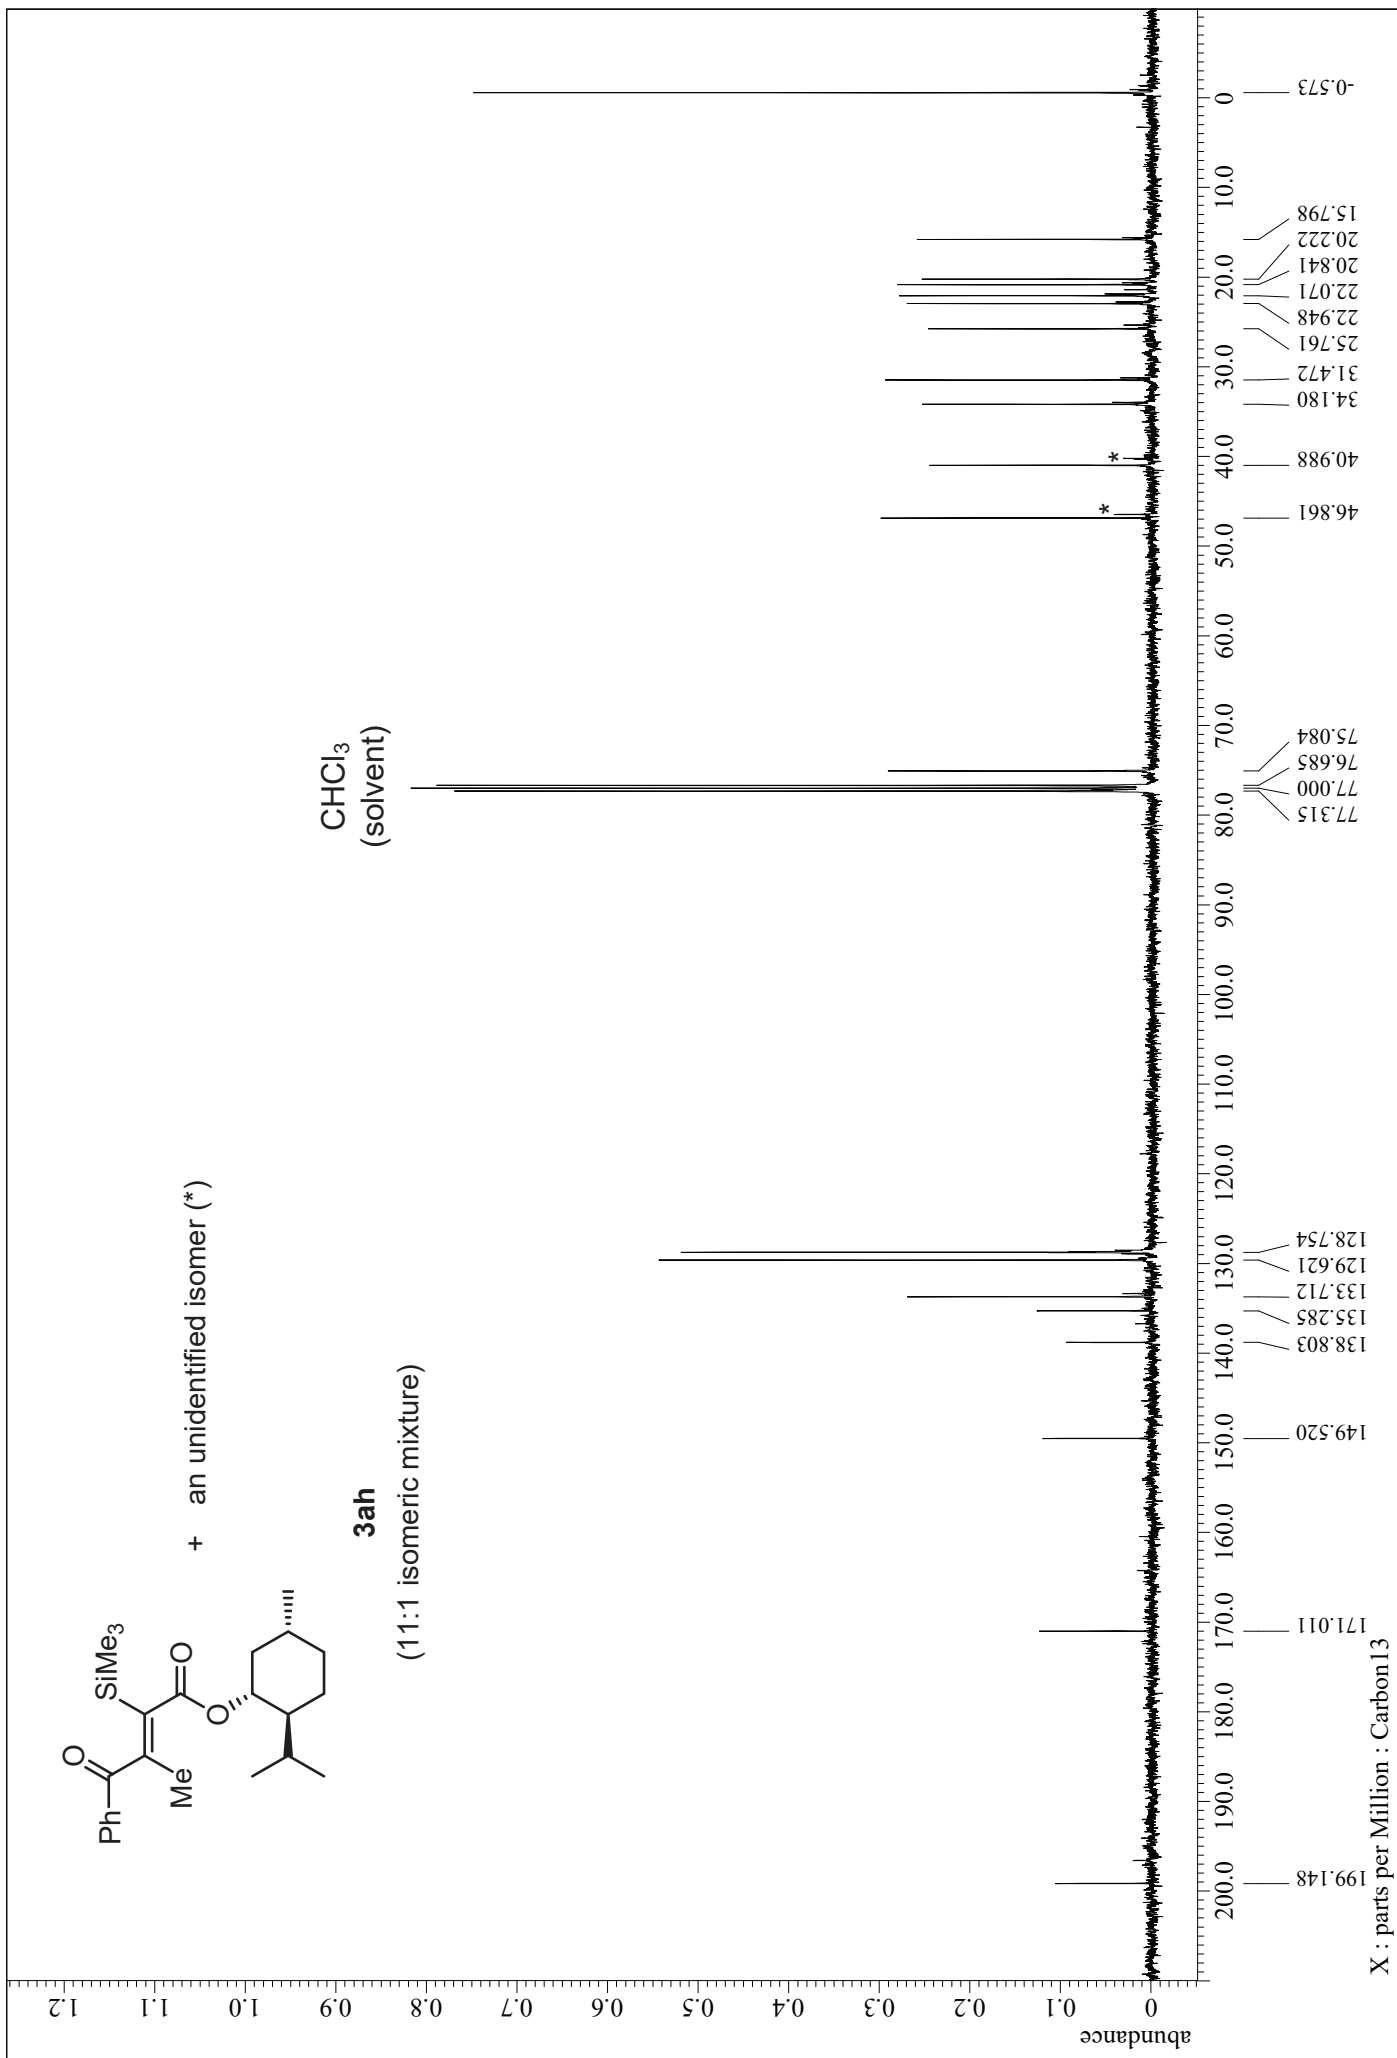

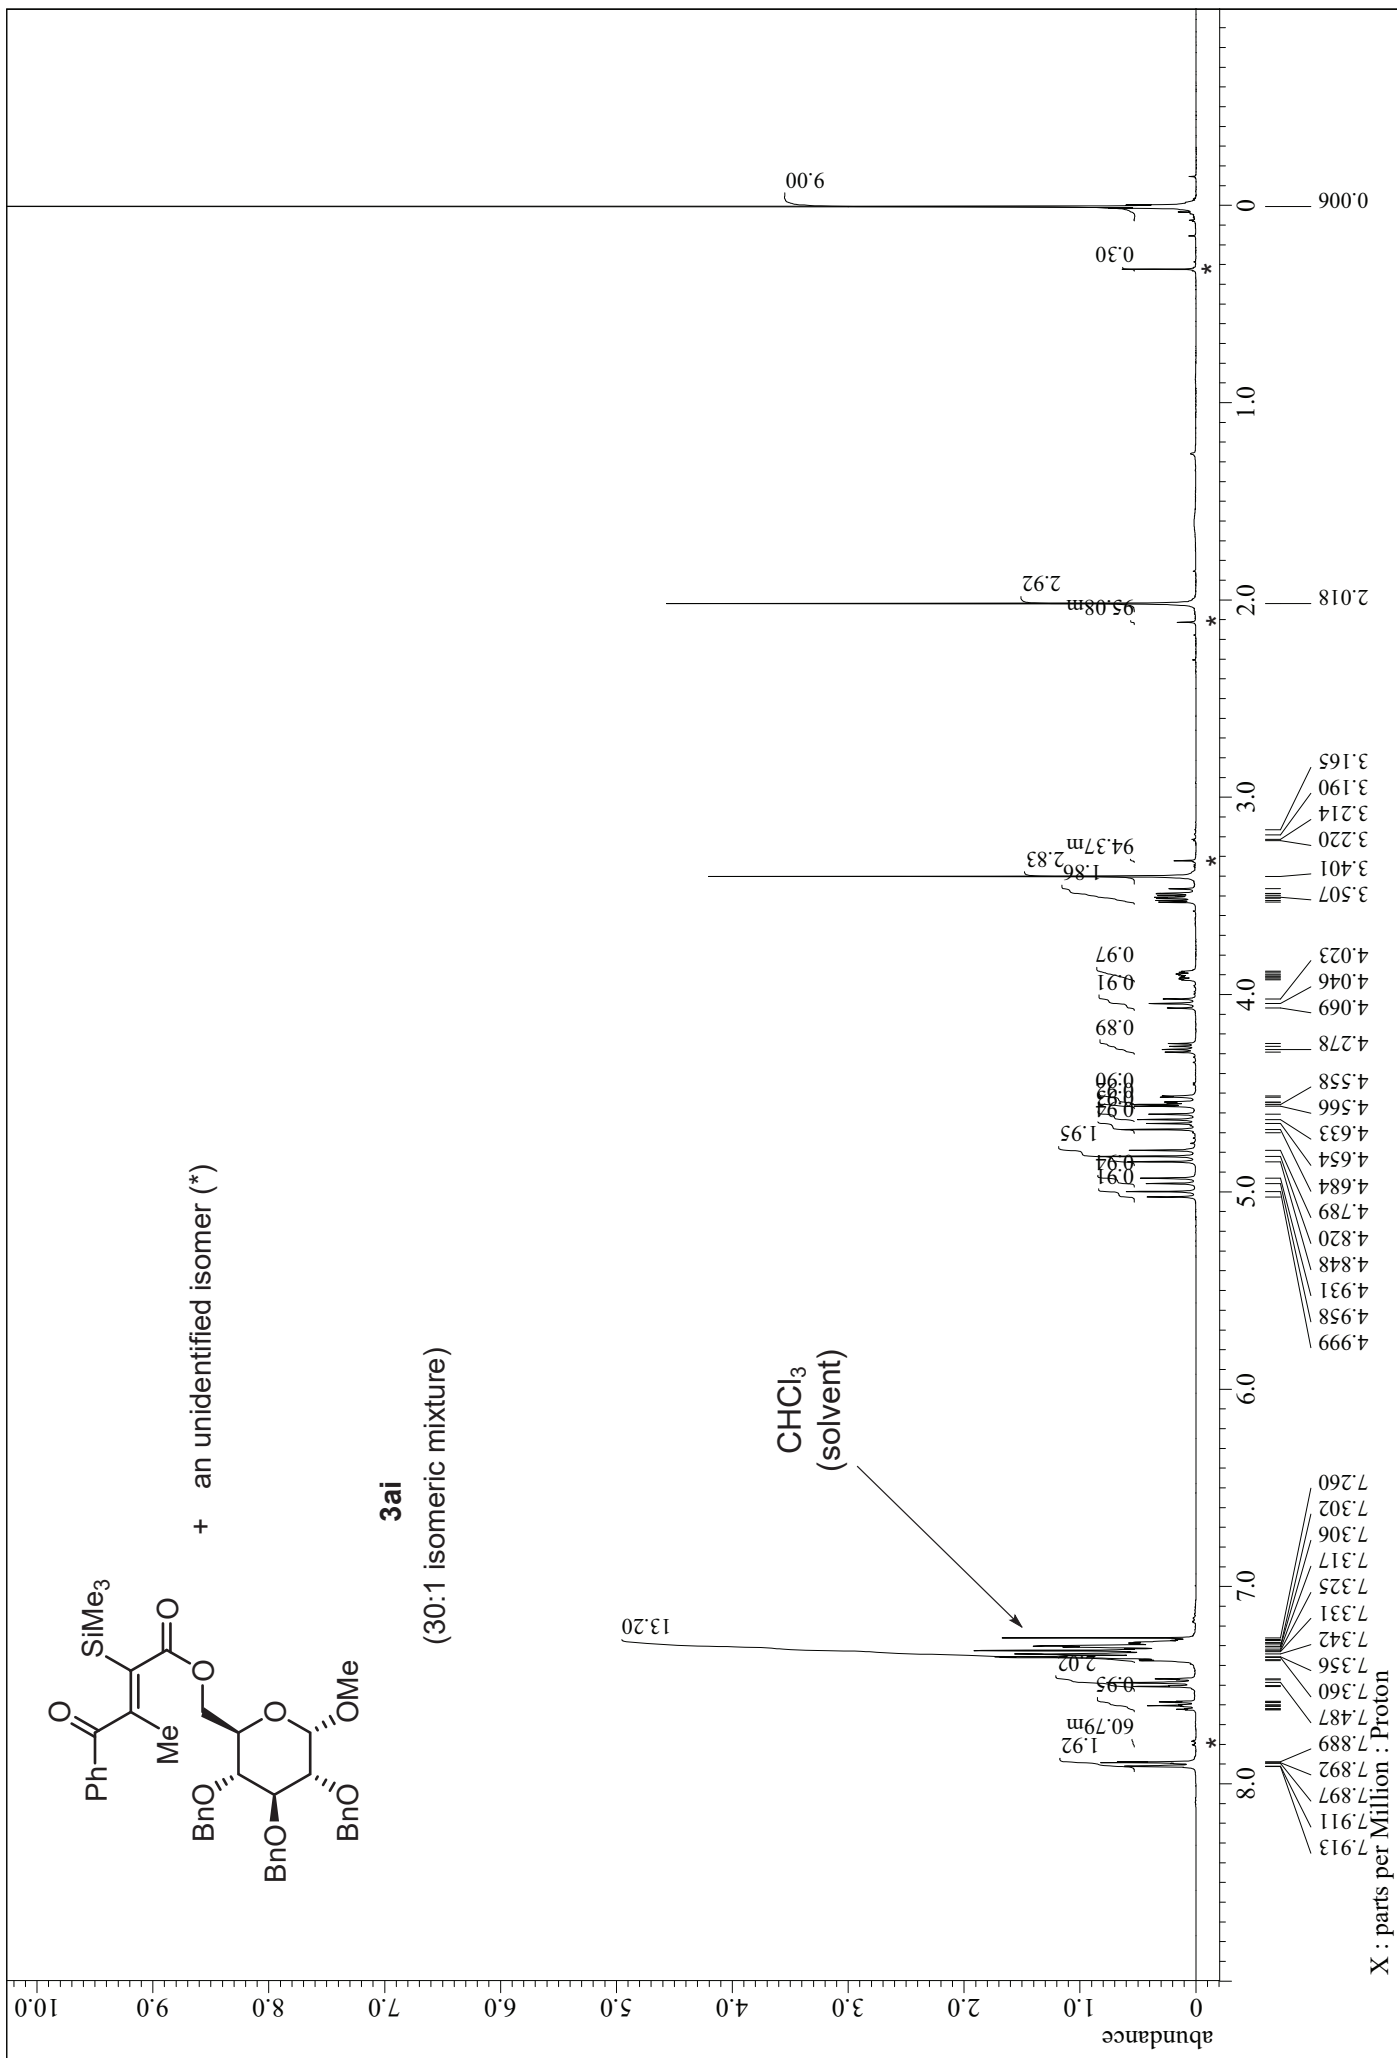

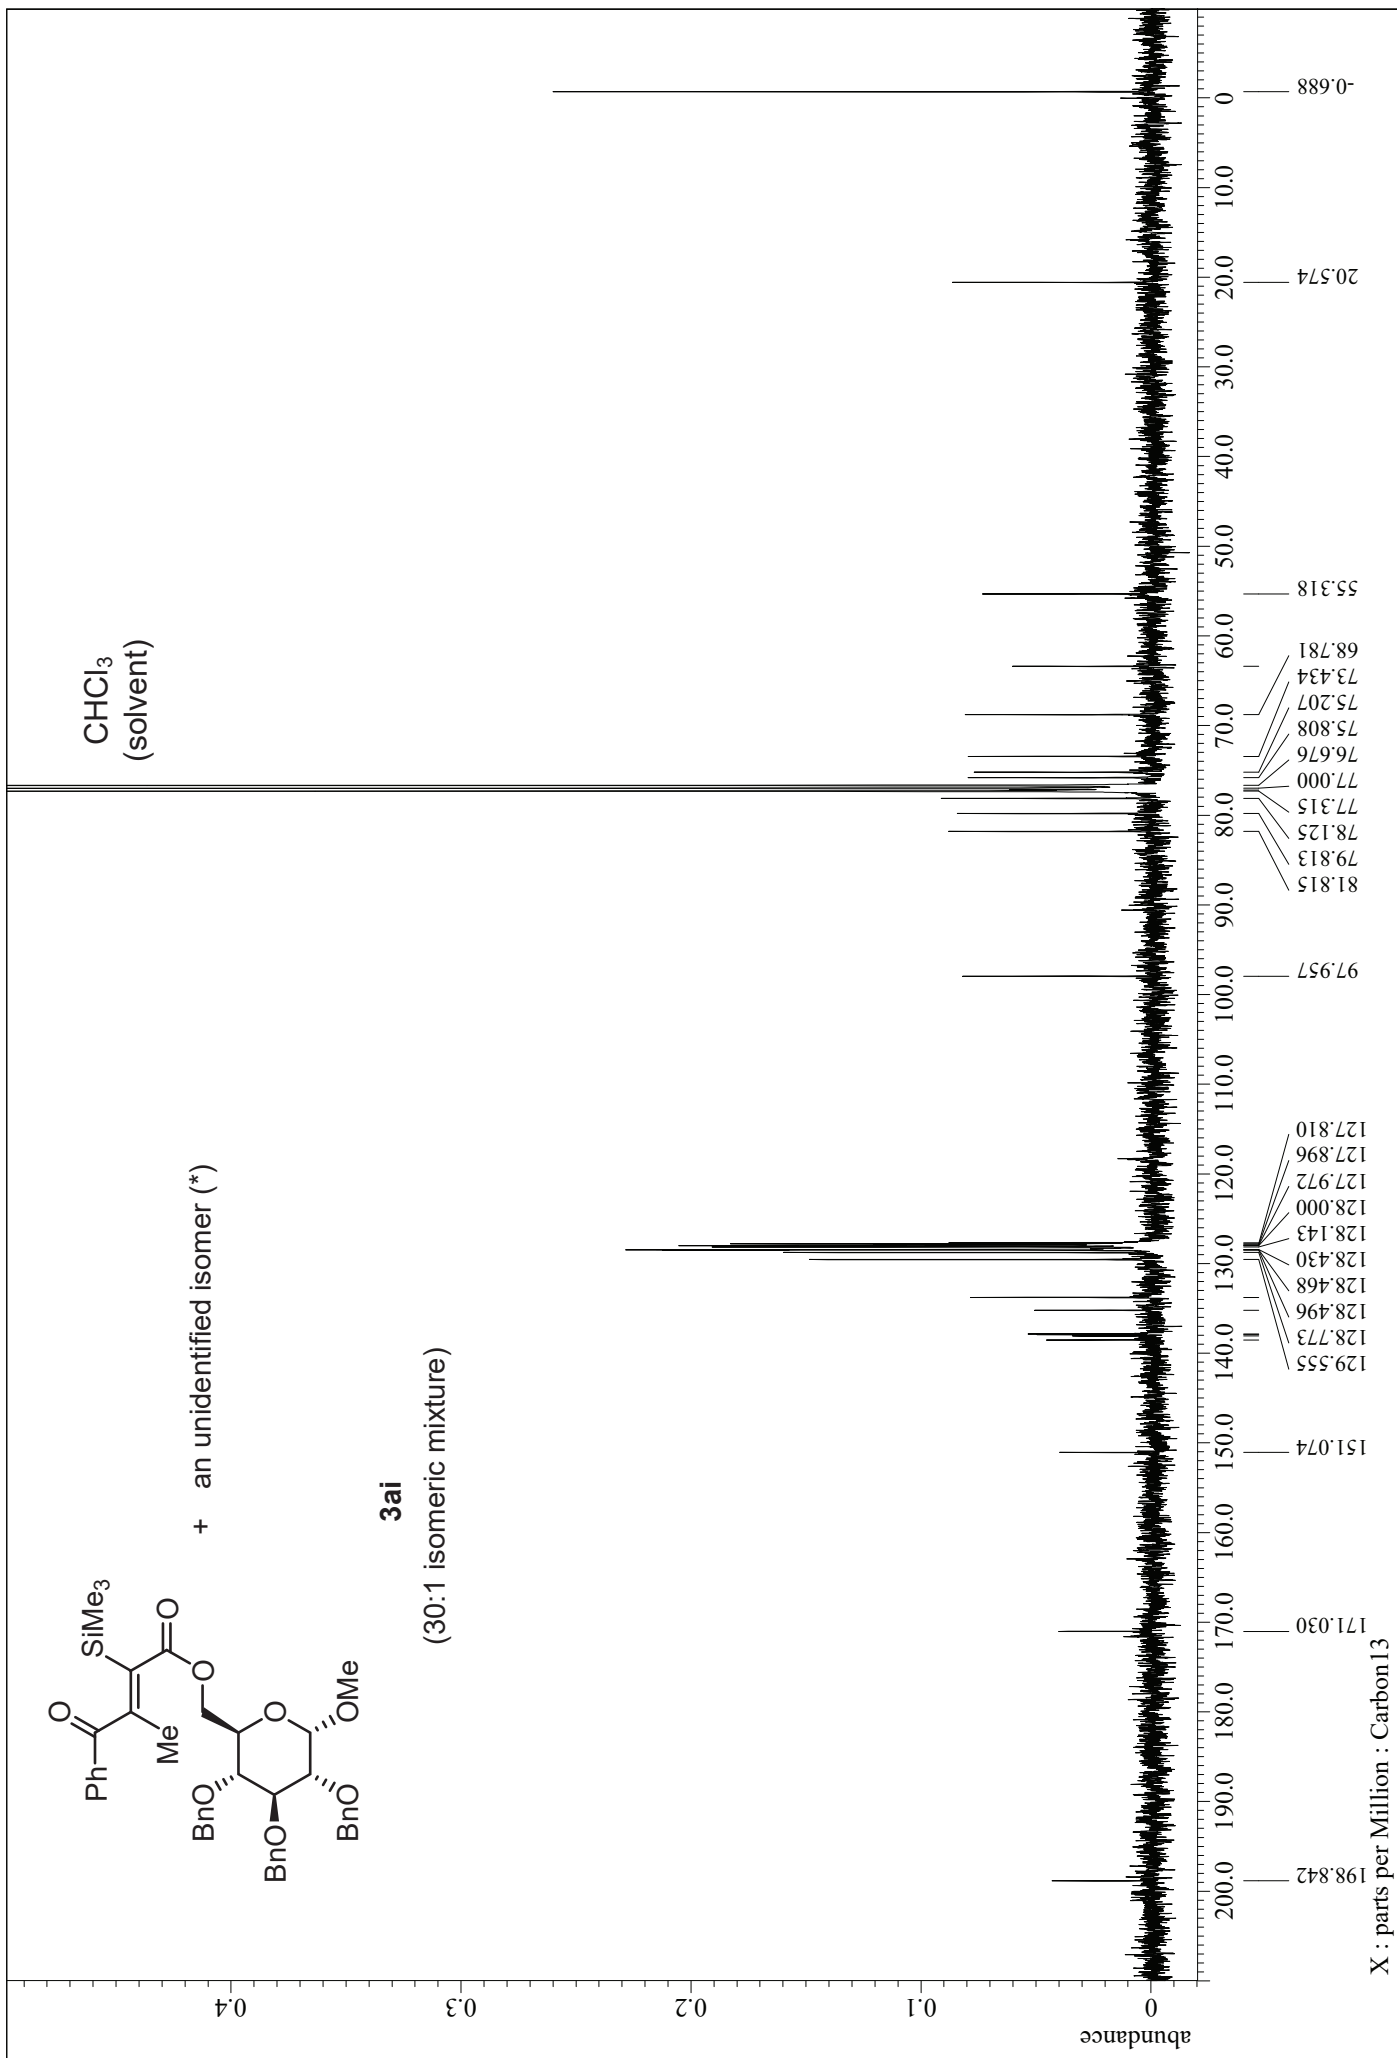

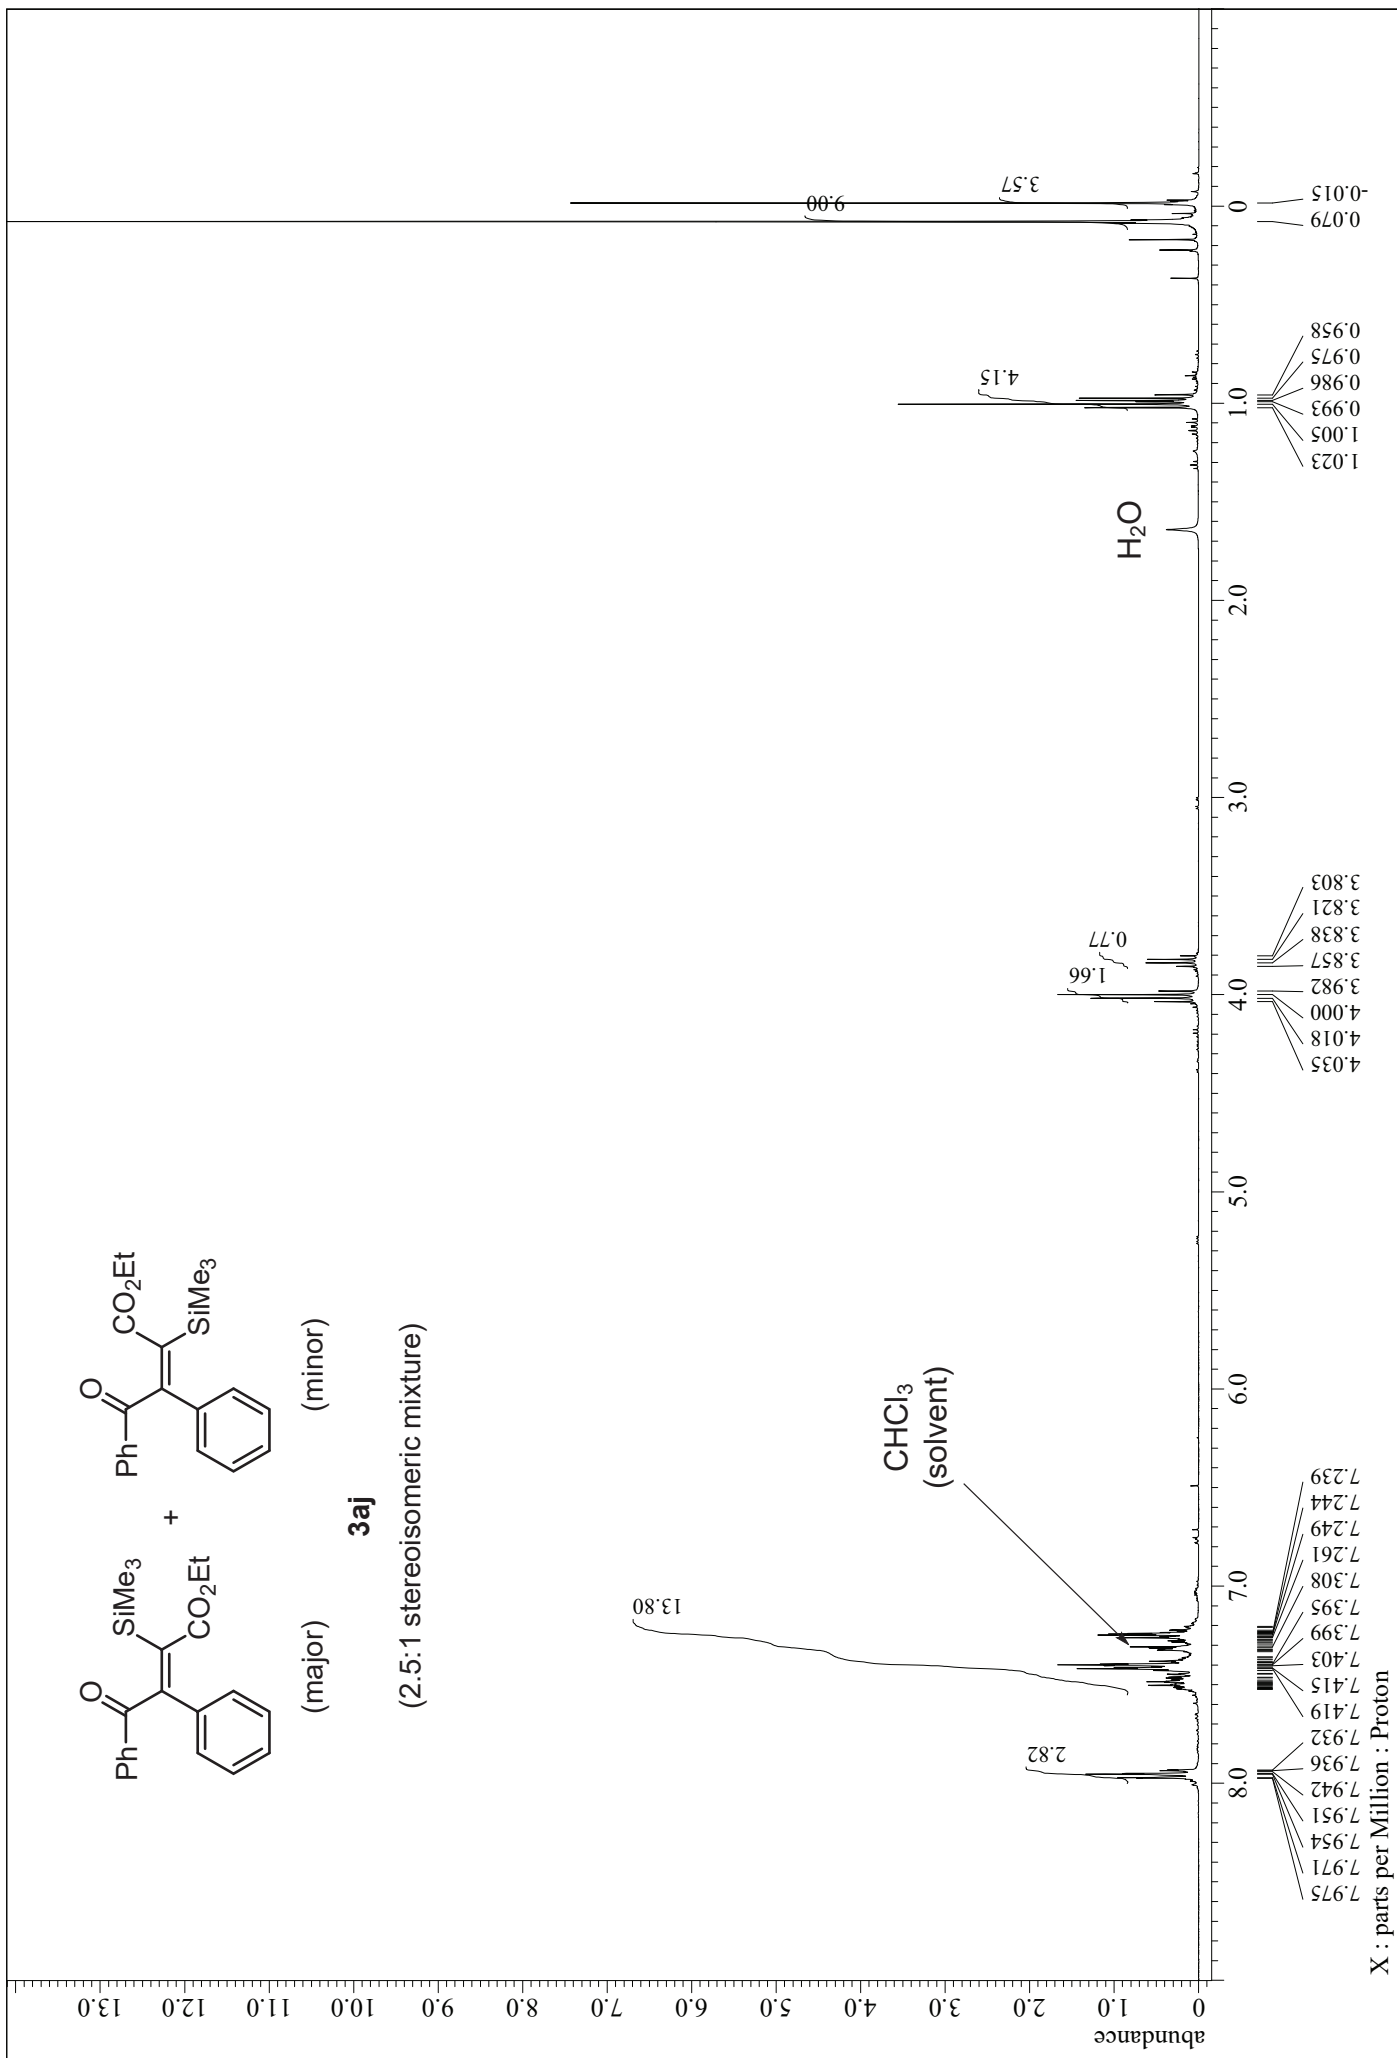

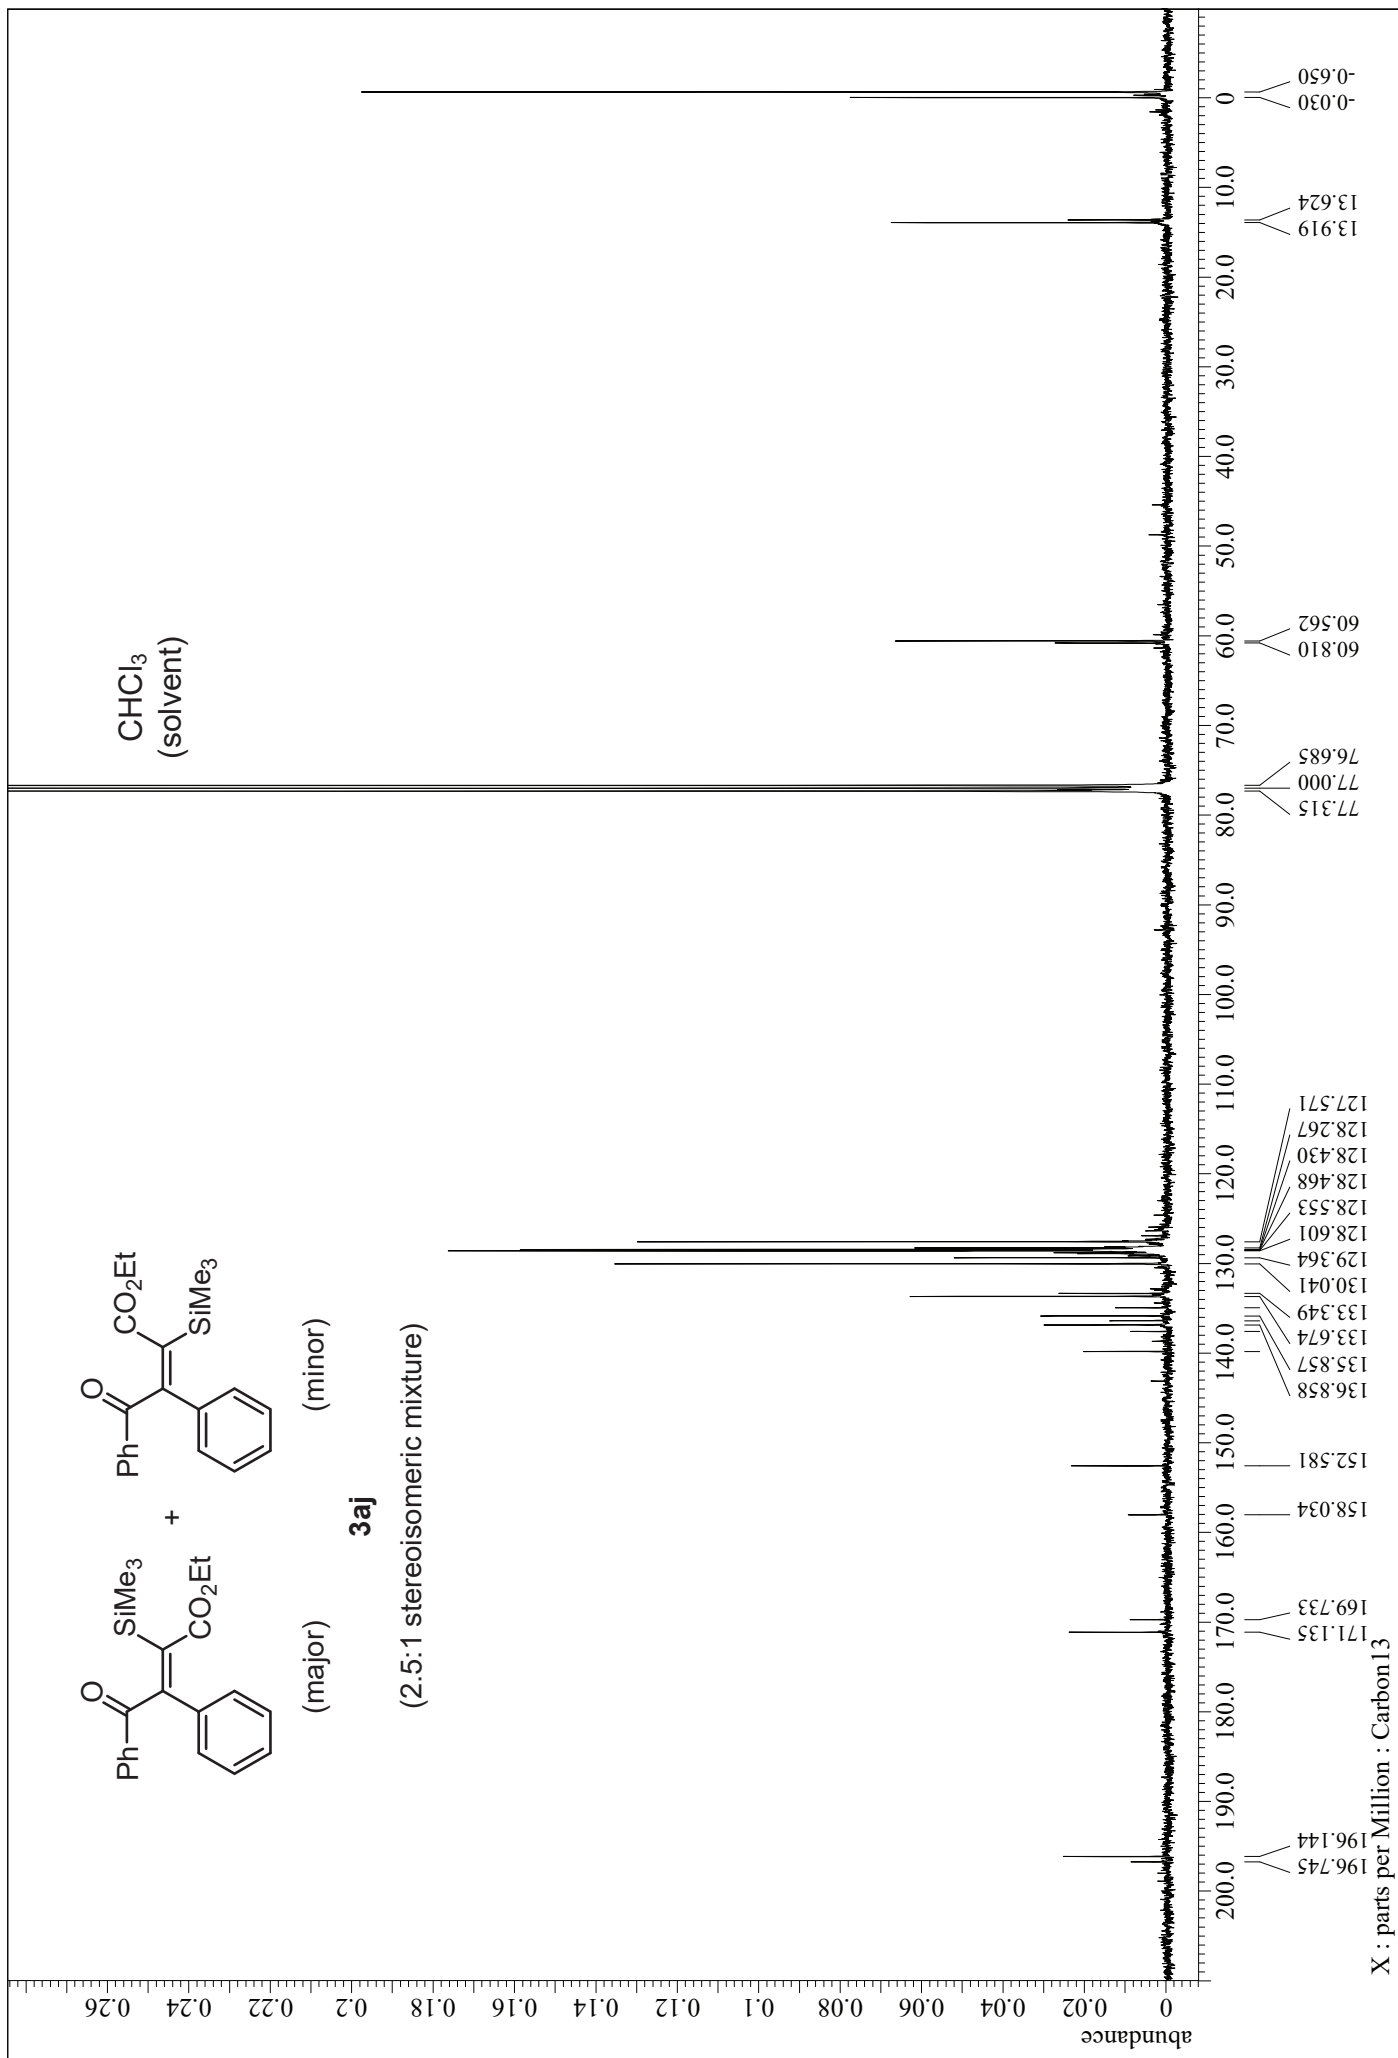

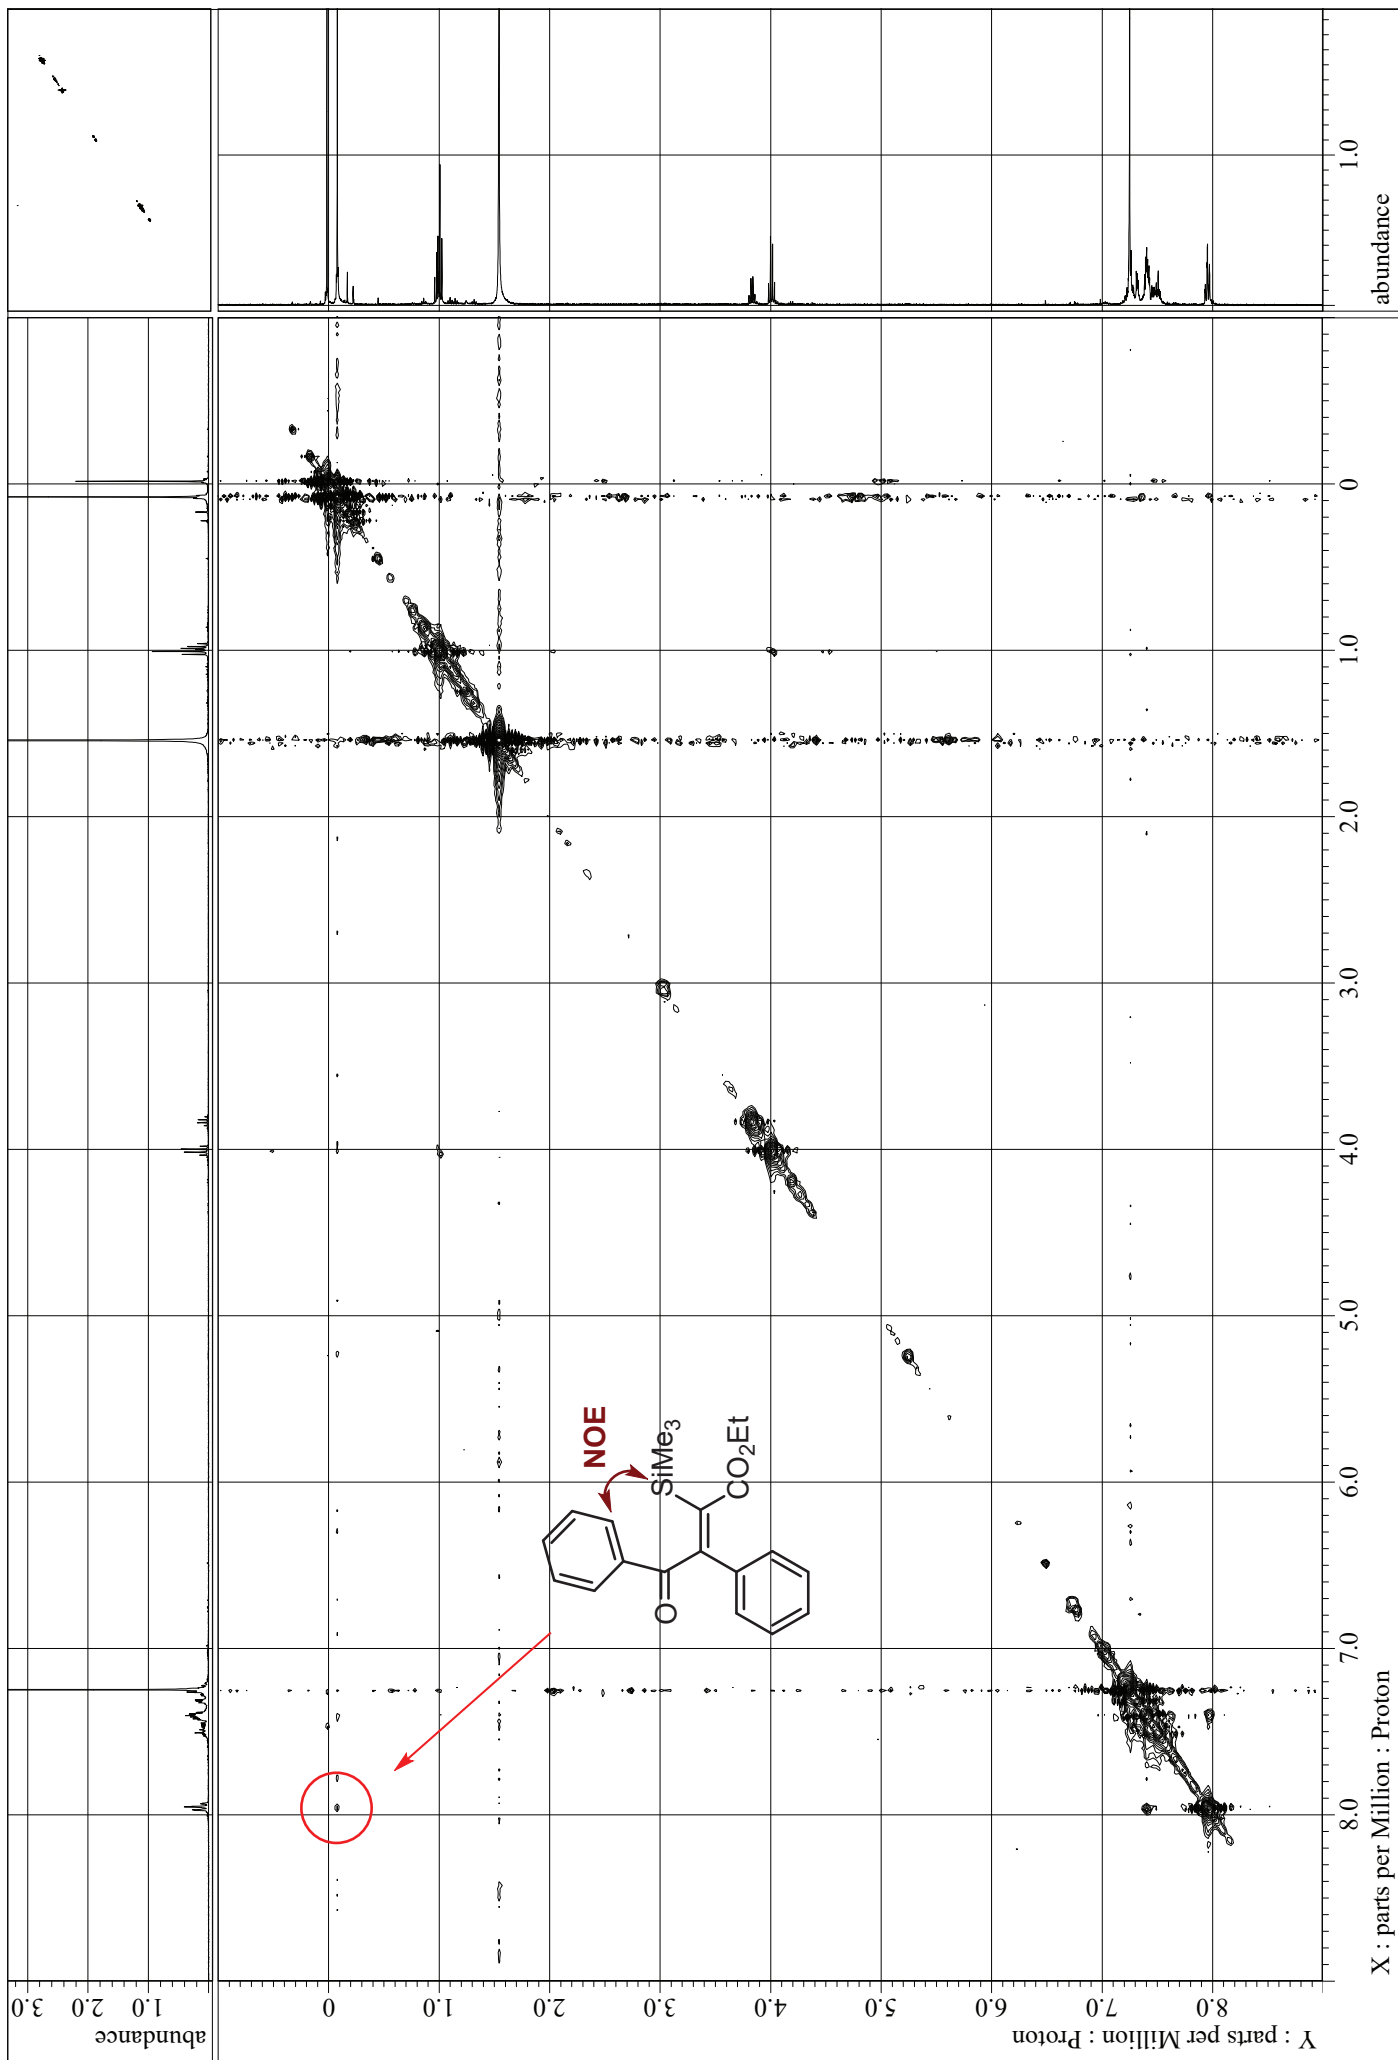

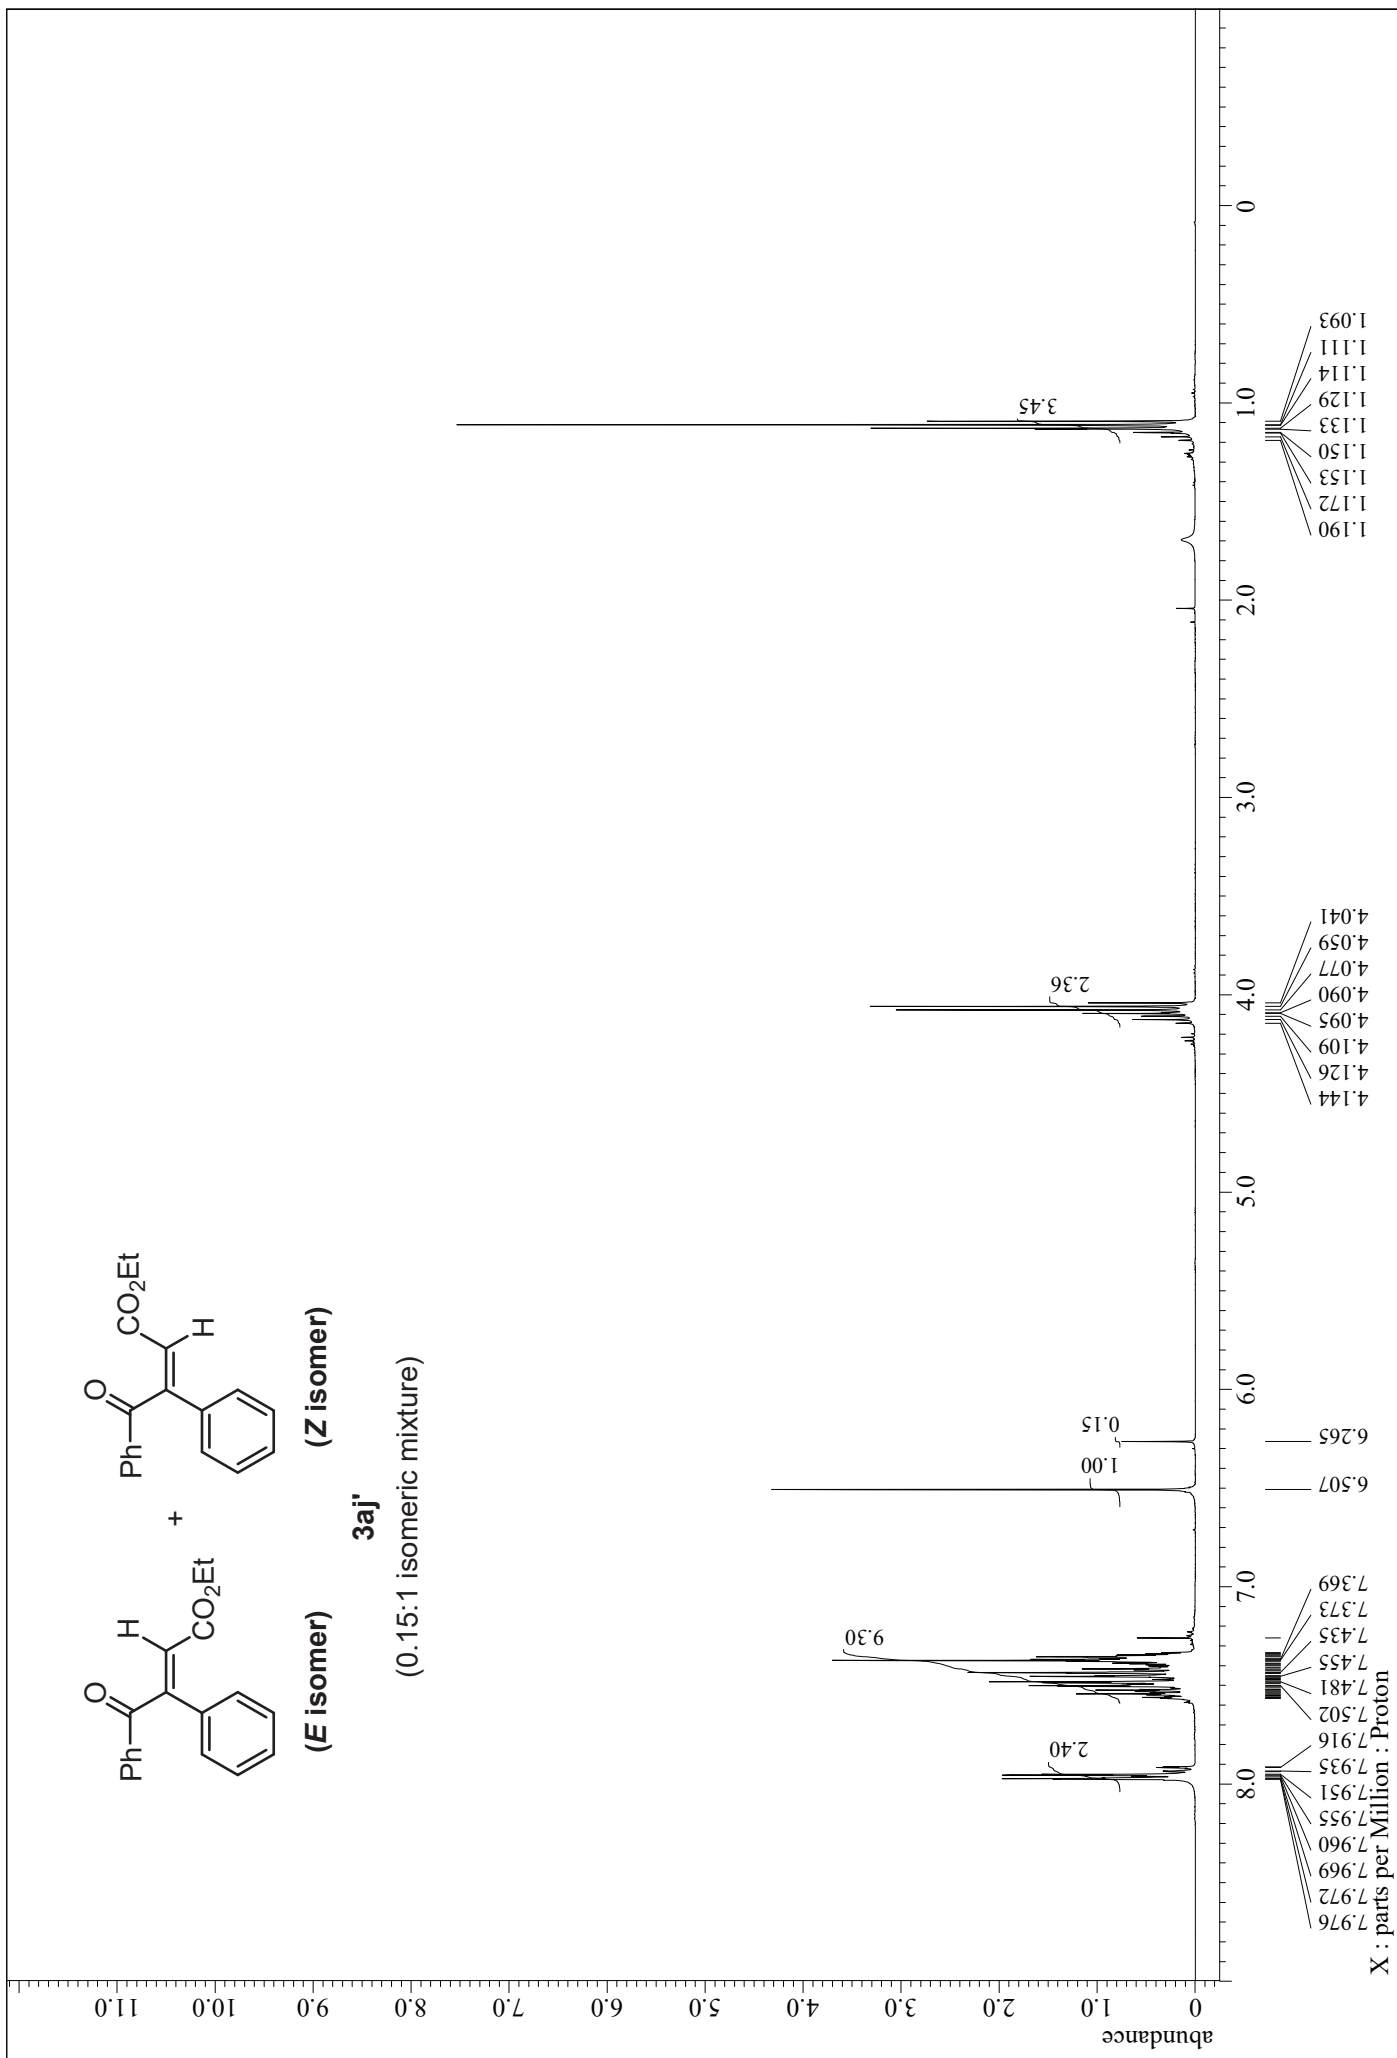

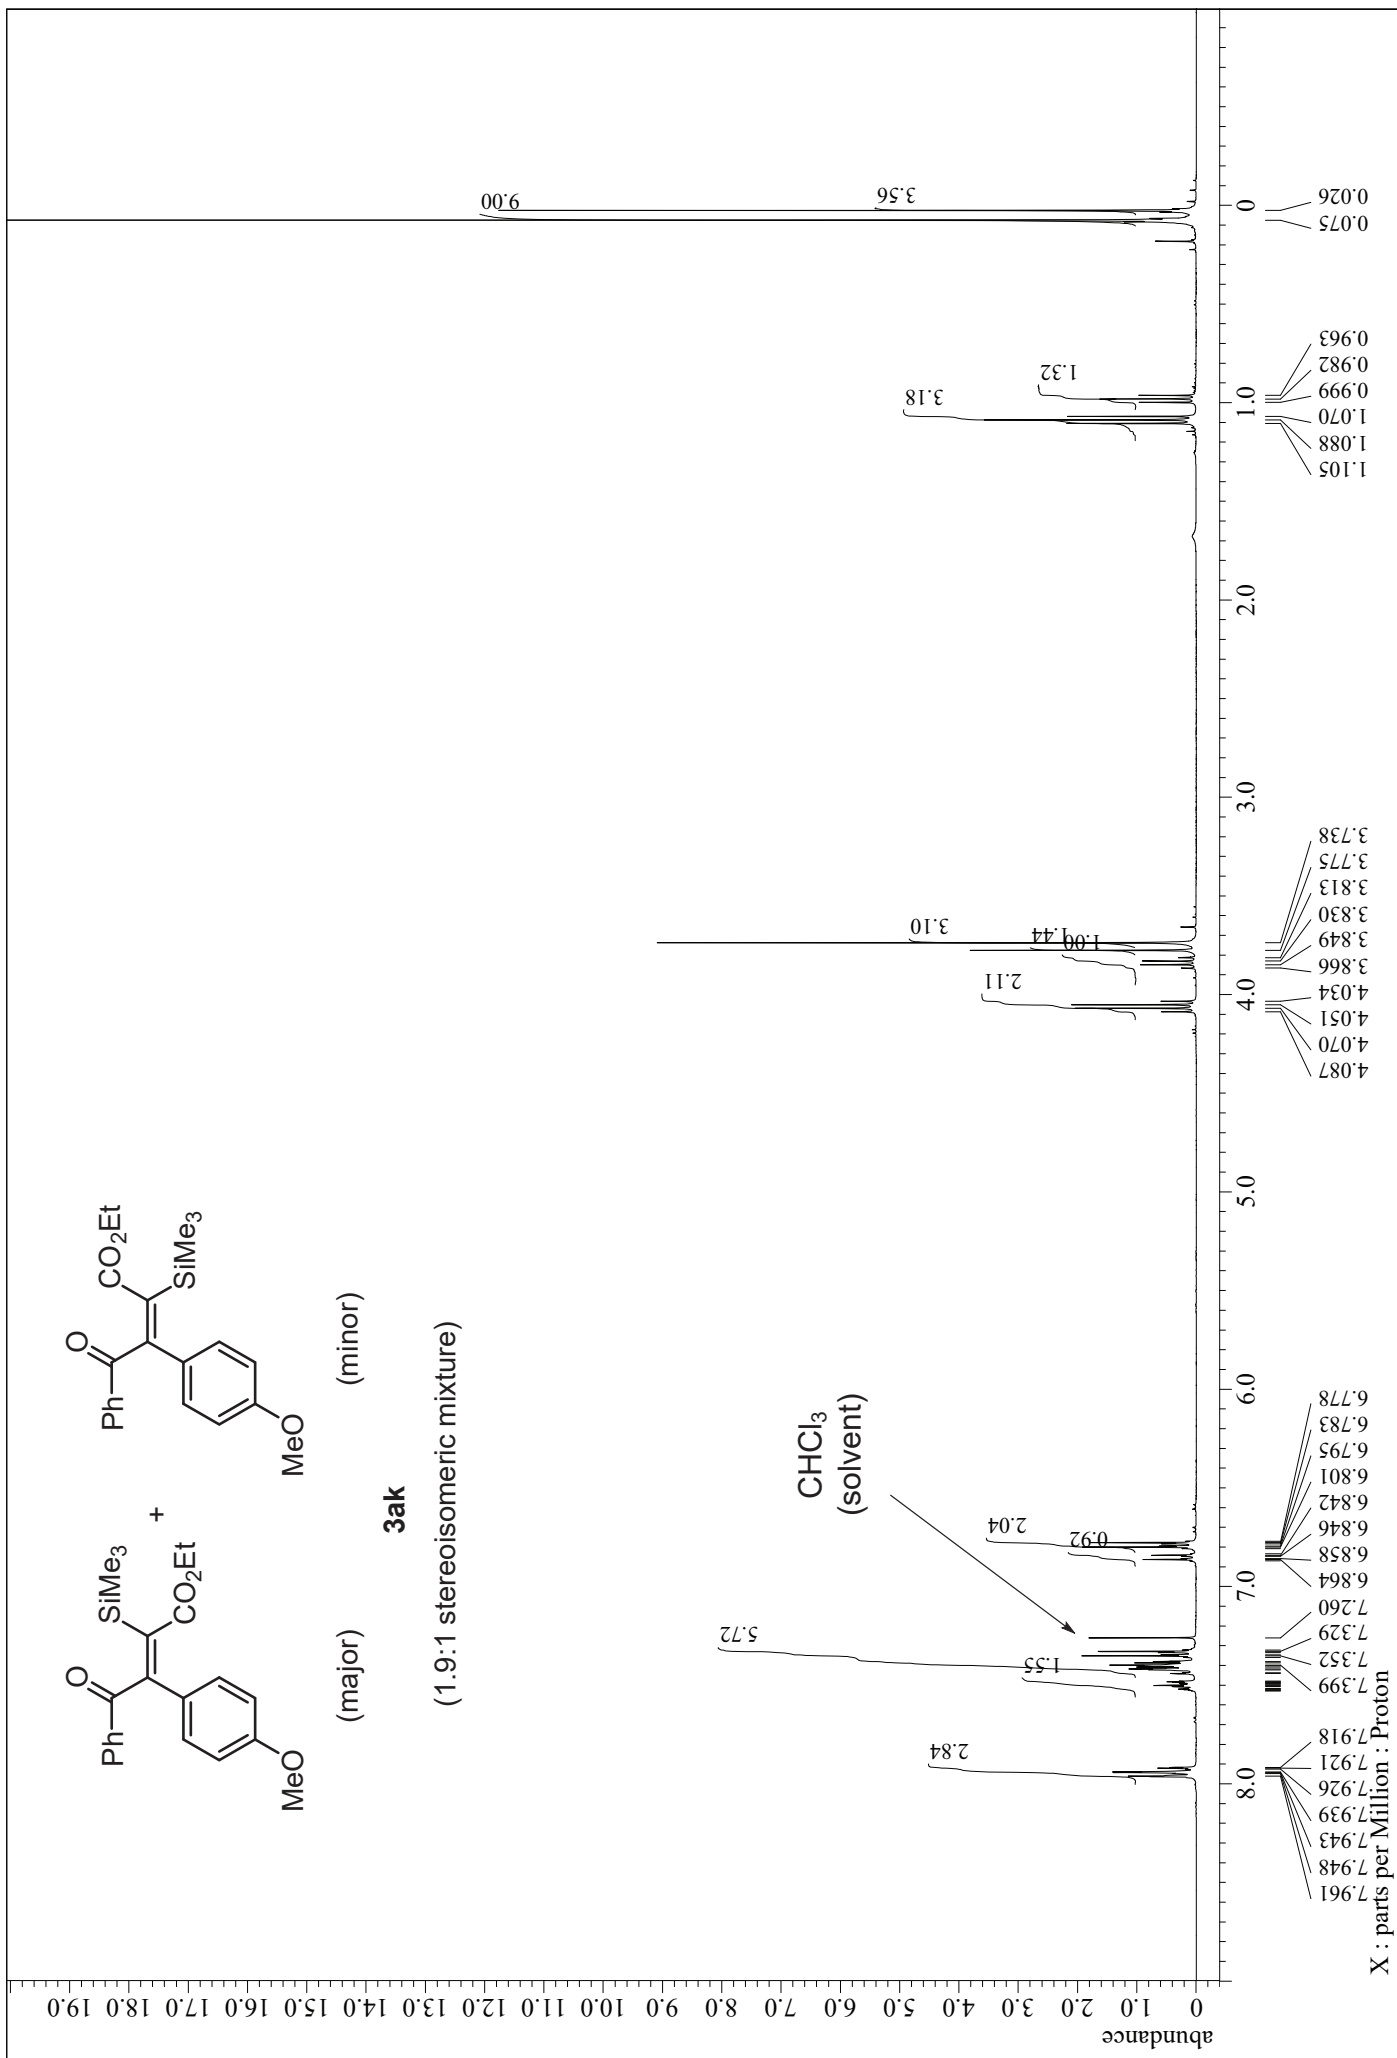



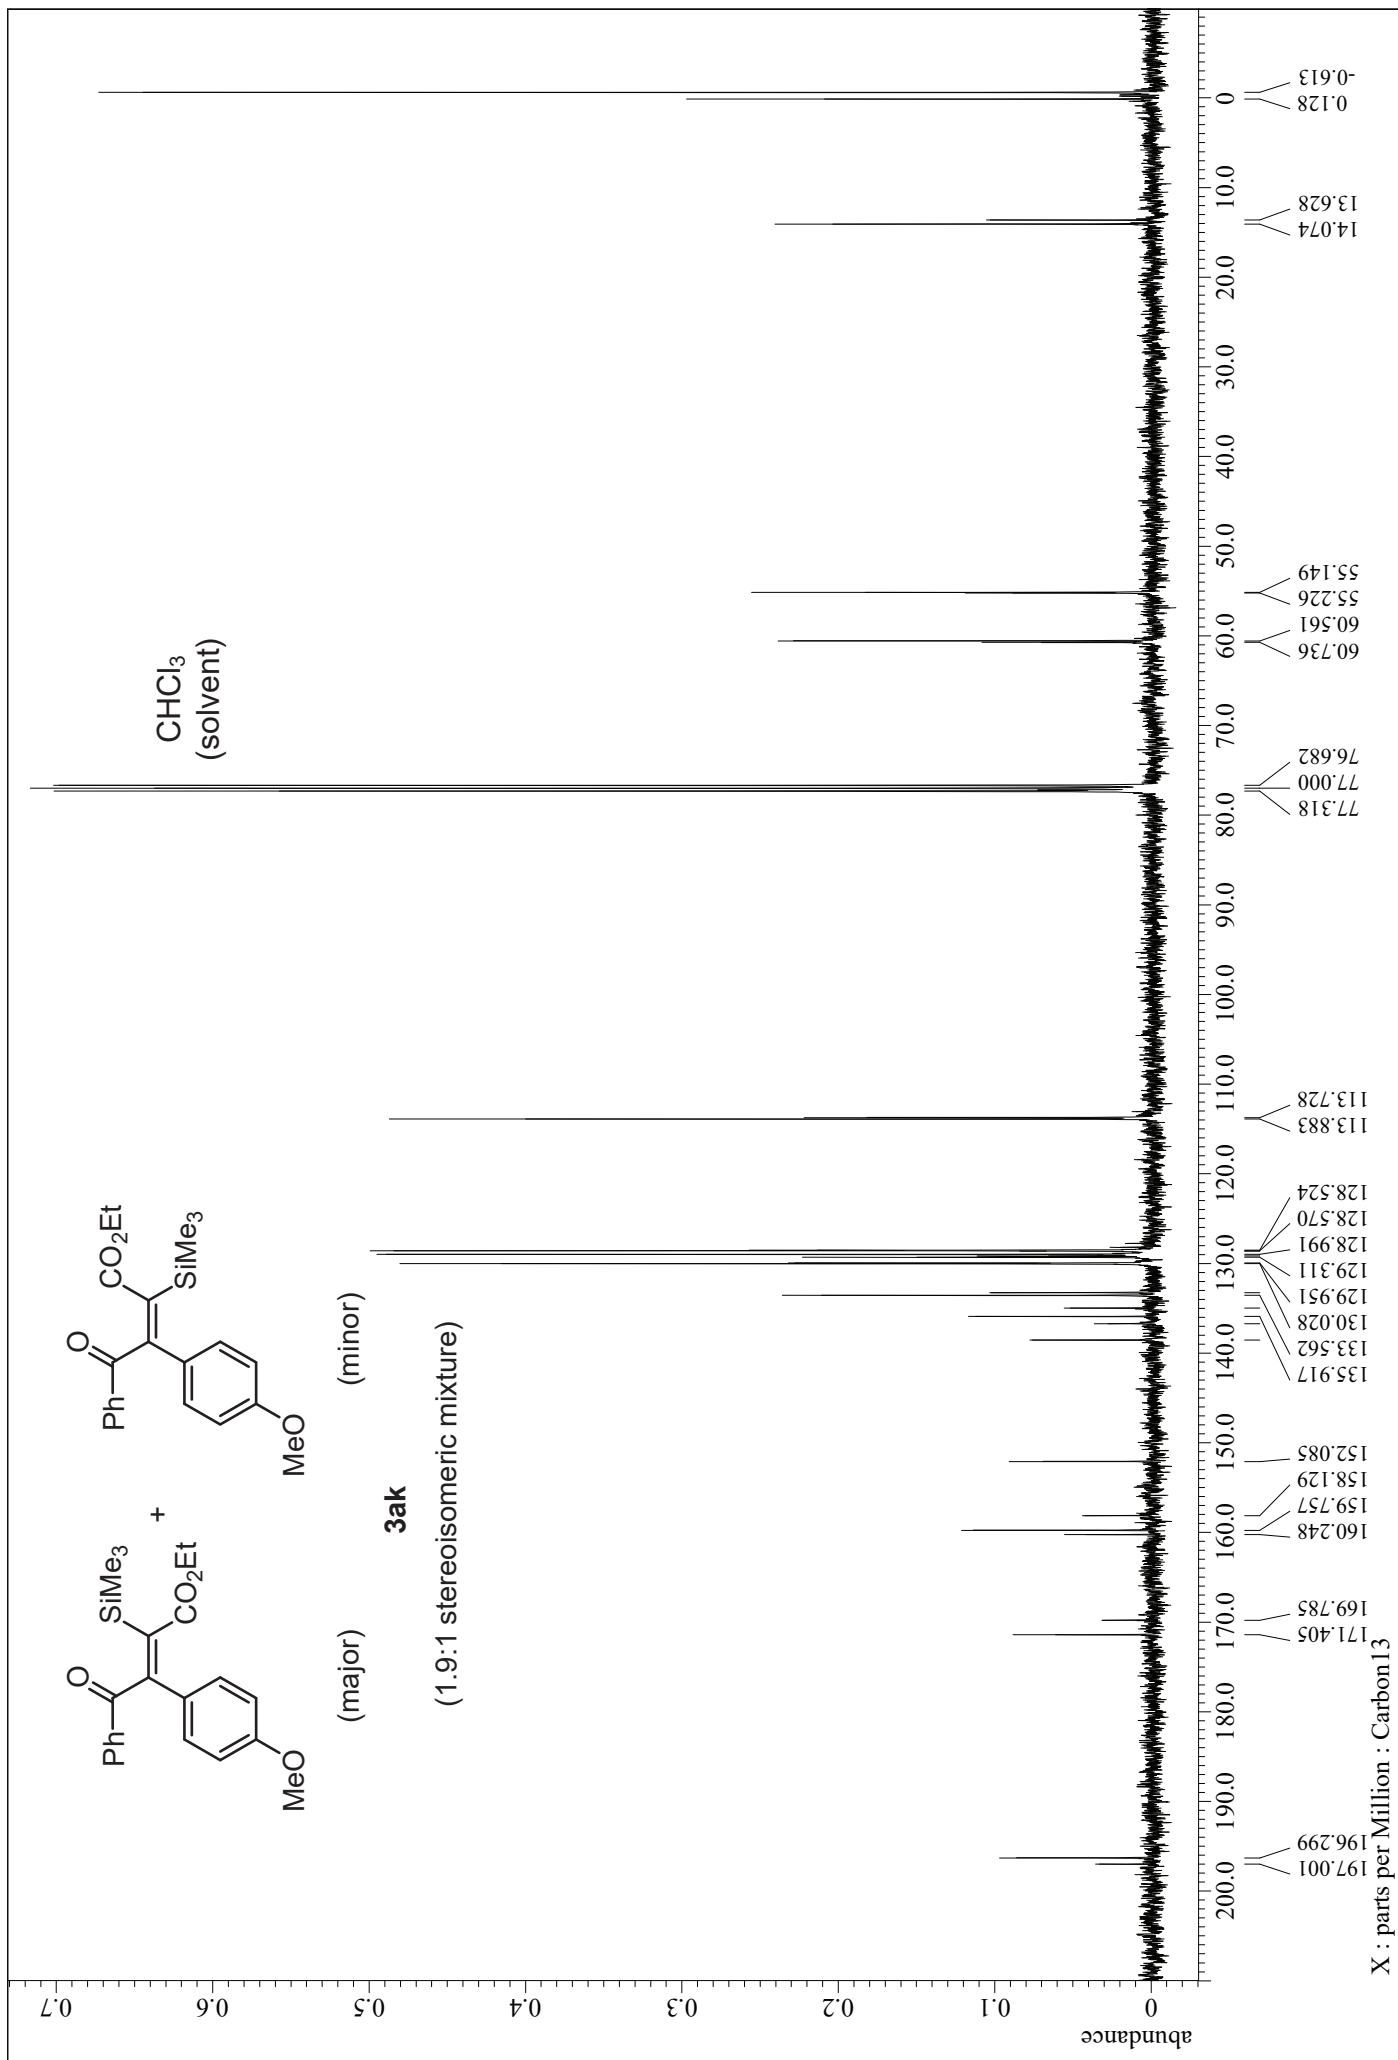

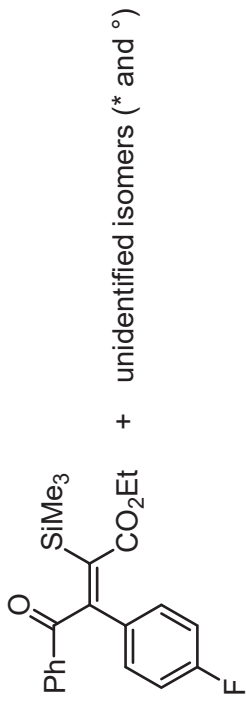

**3al**  
(14:1 isomeric mixture)

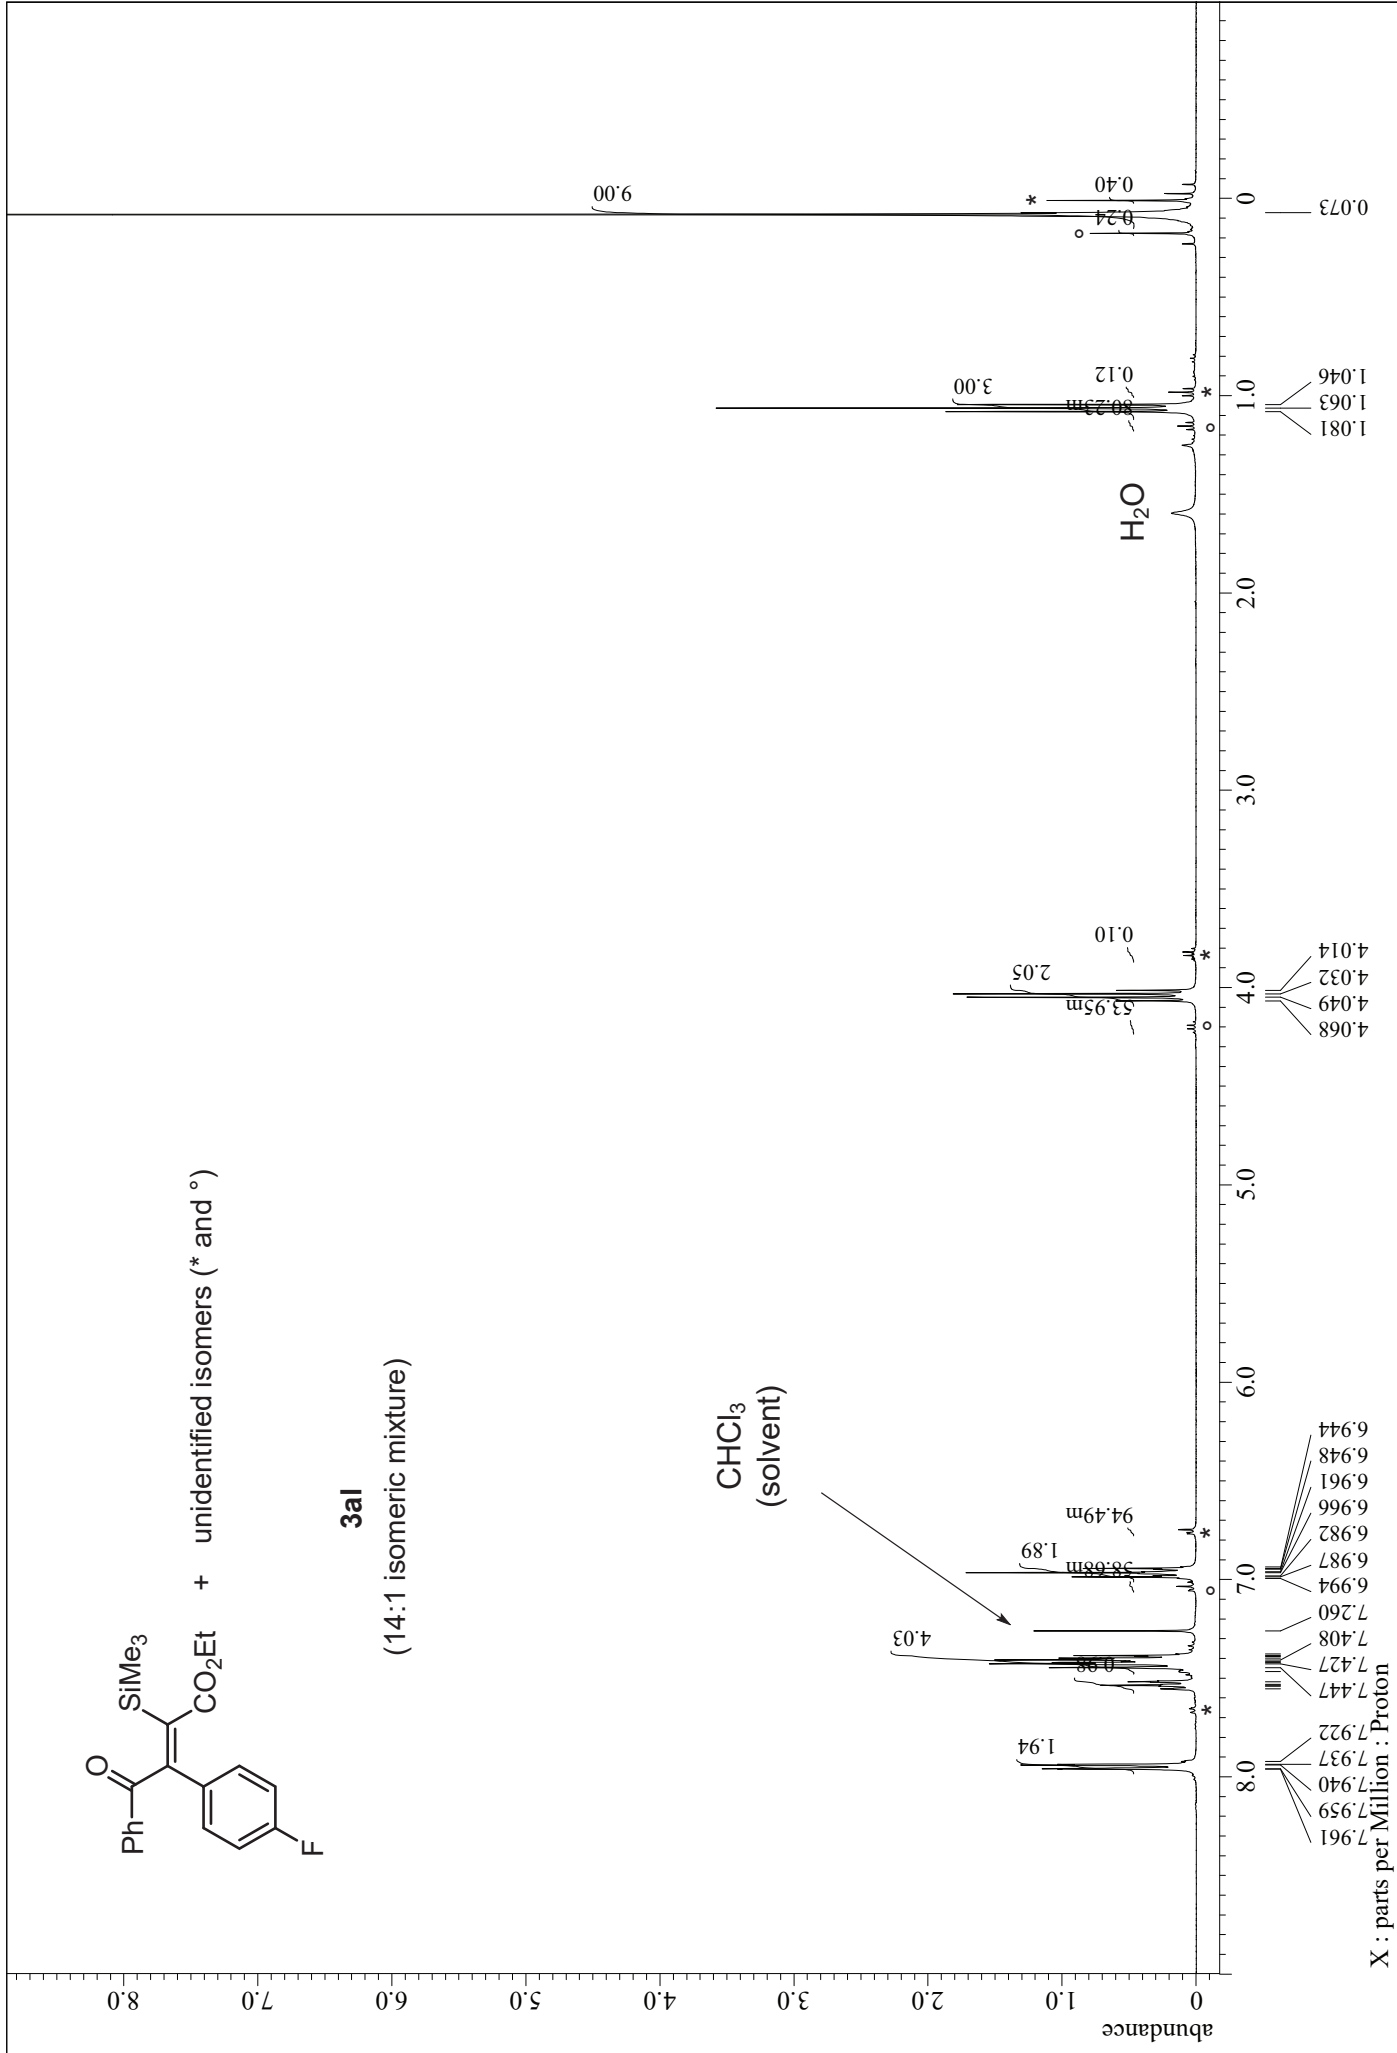

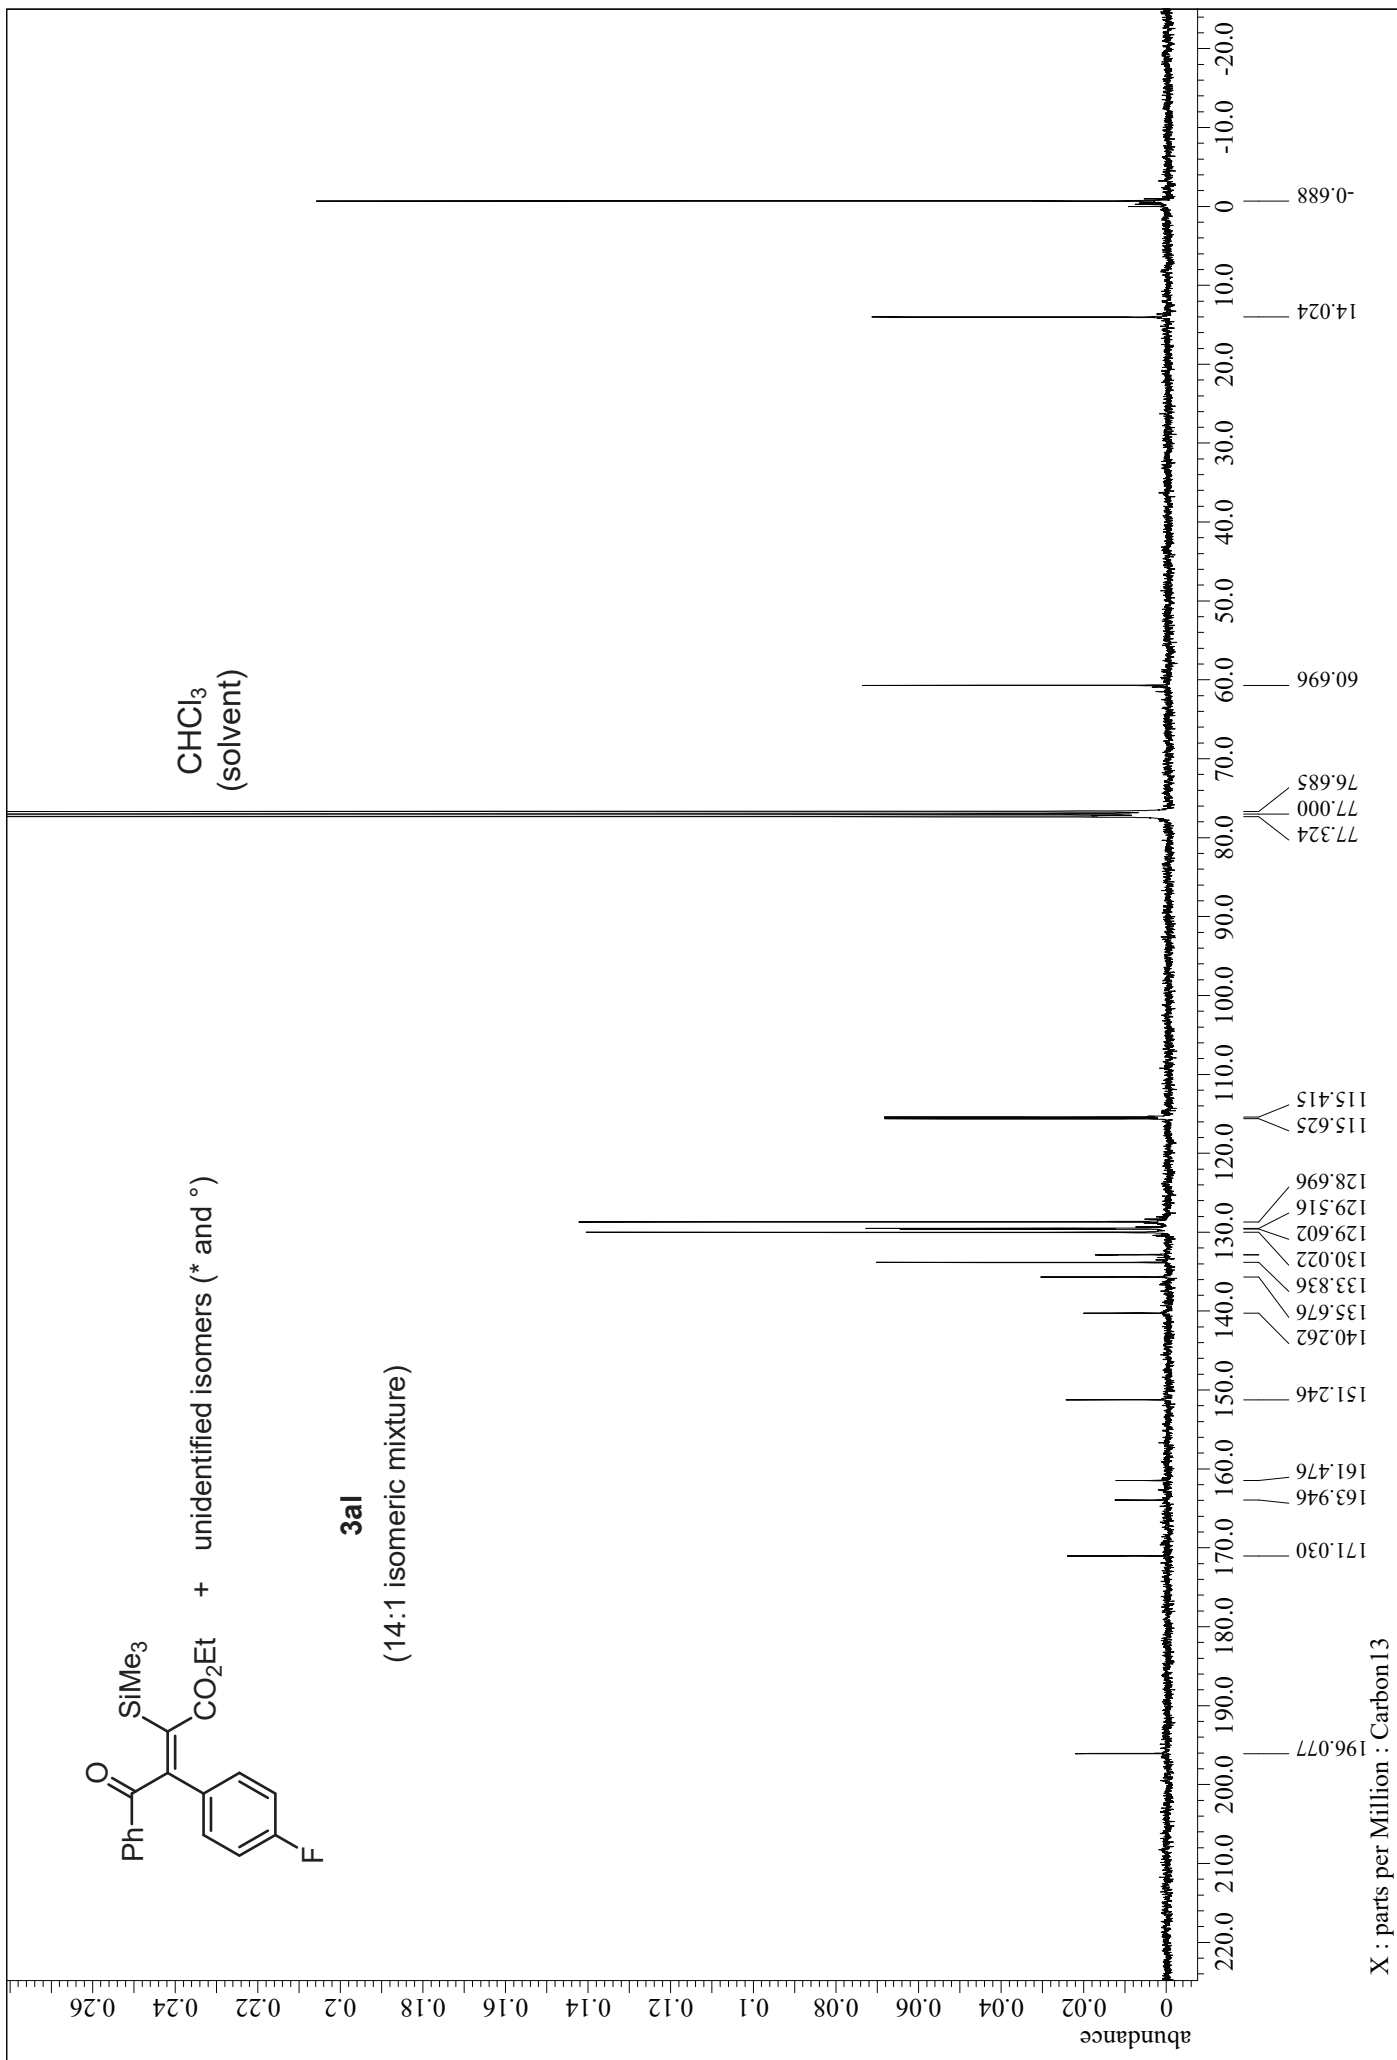

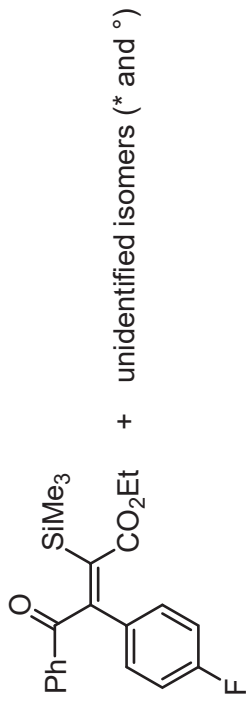

**3al**  
(14:1 isomeric mixture)

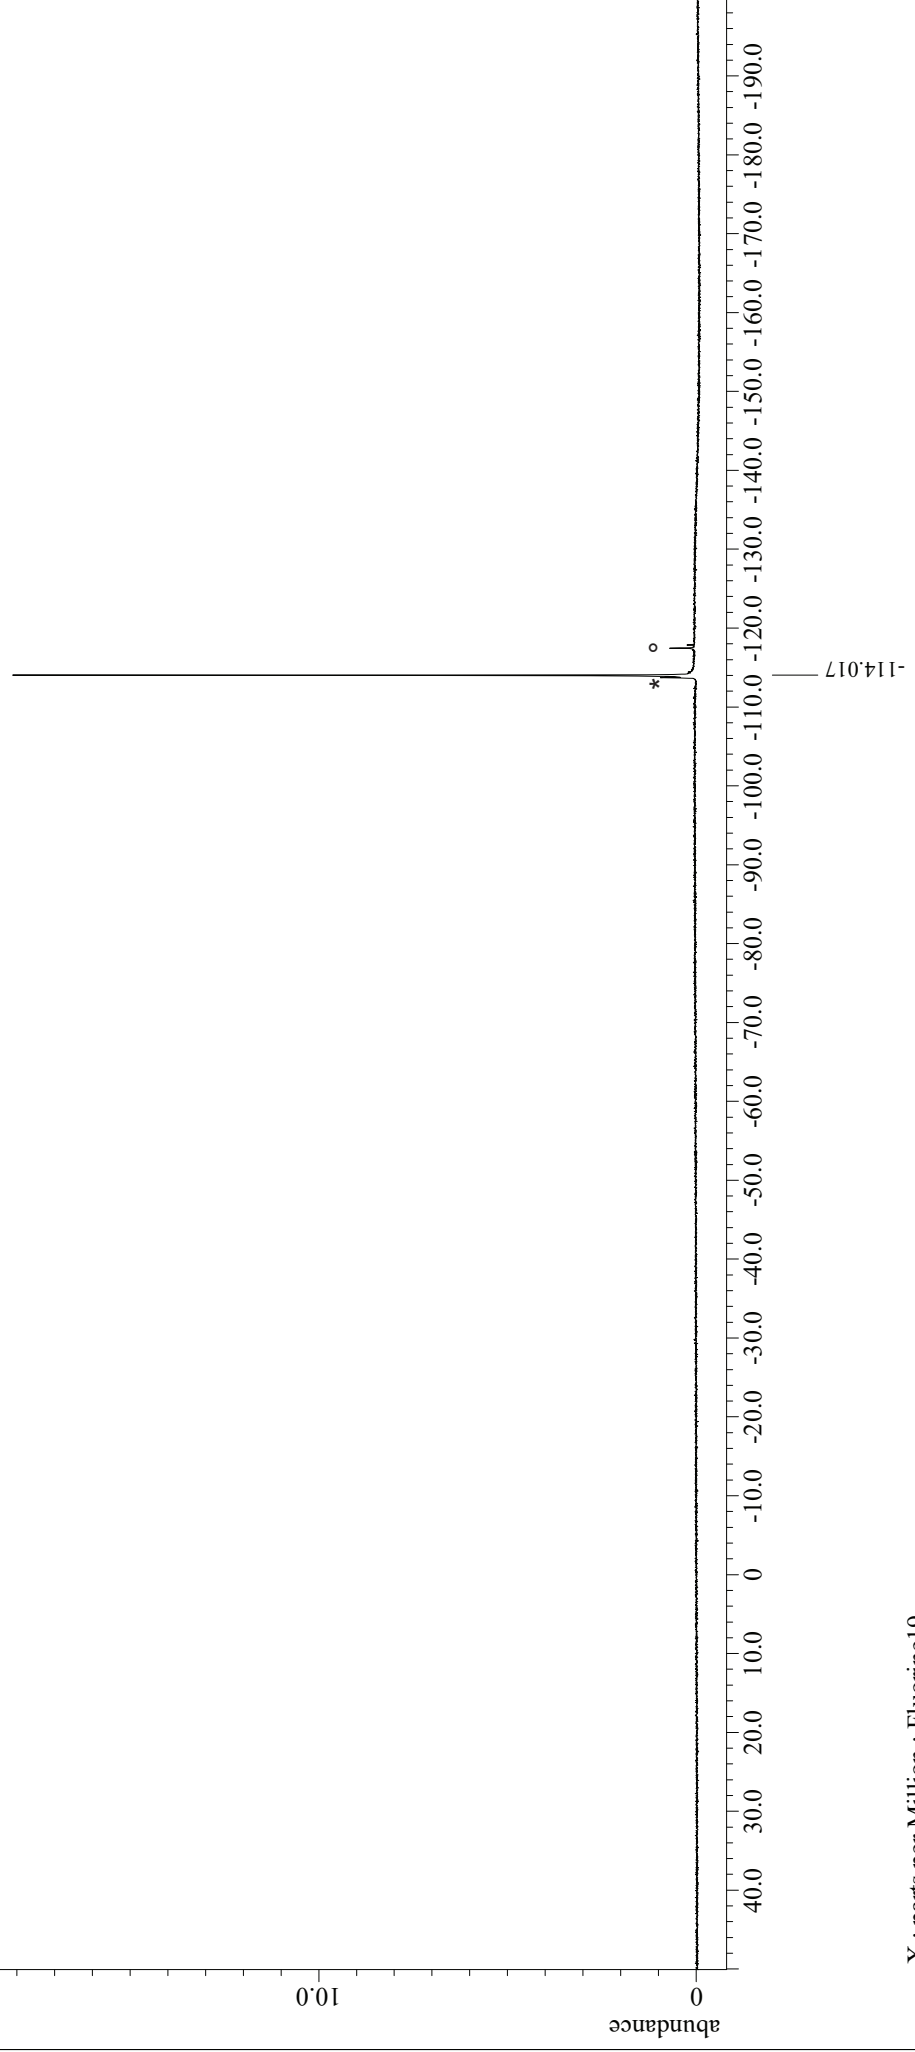

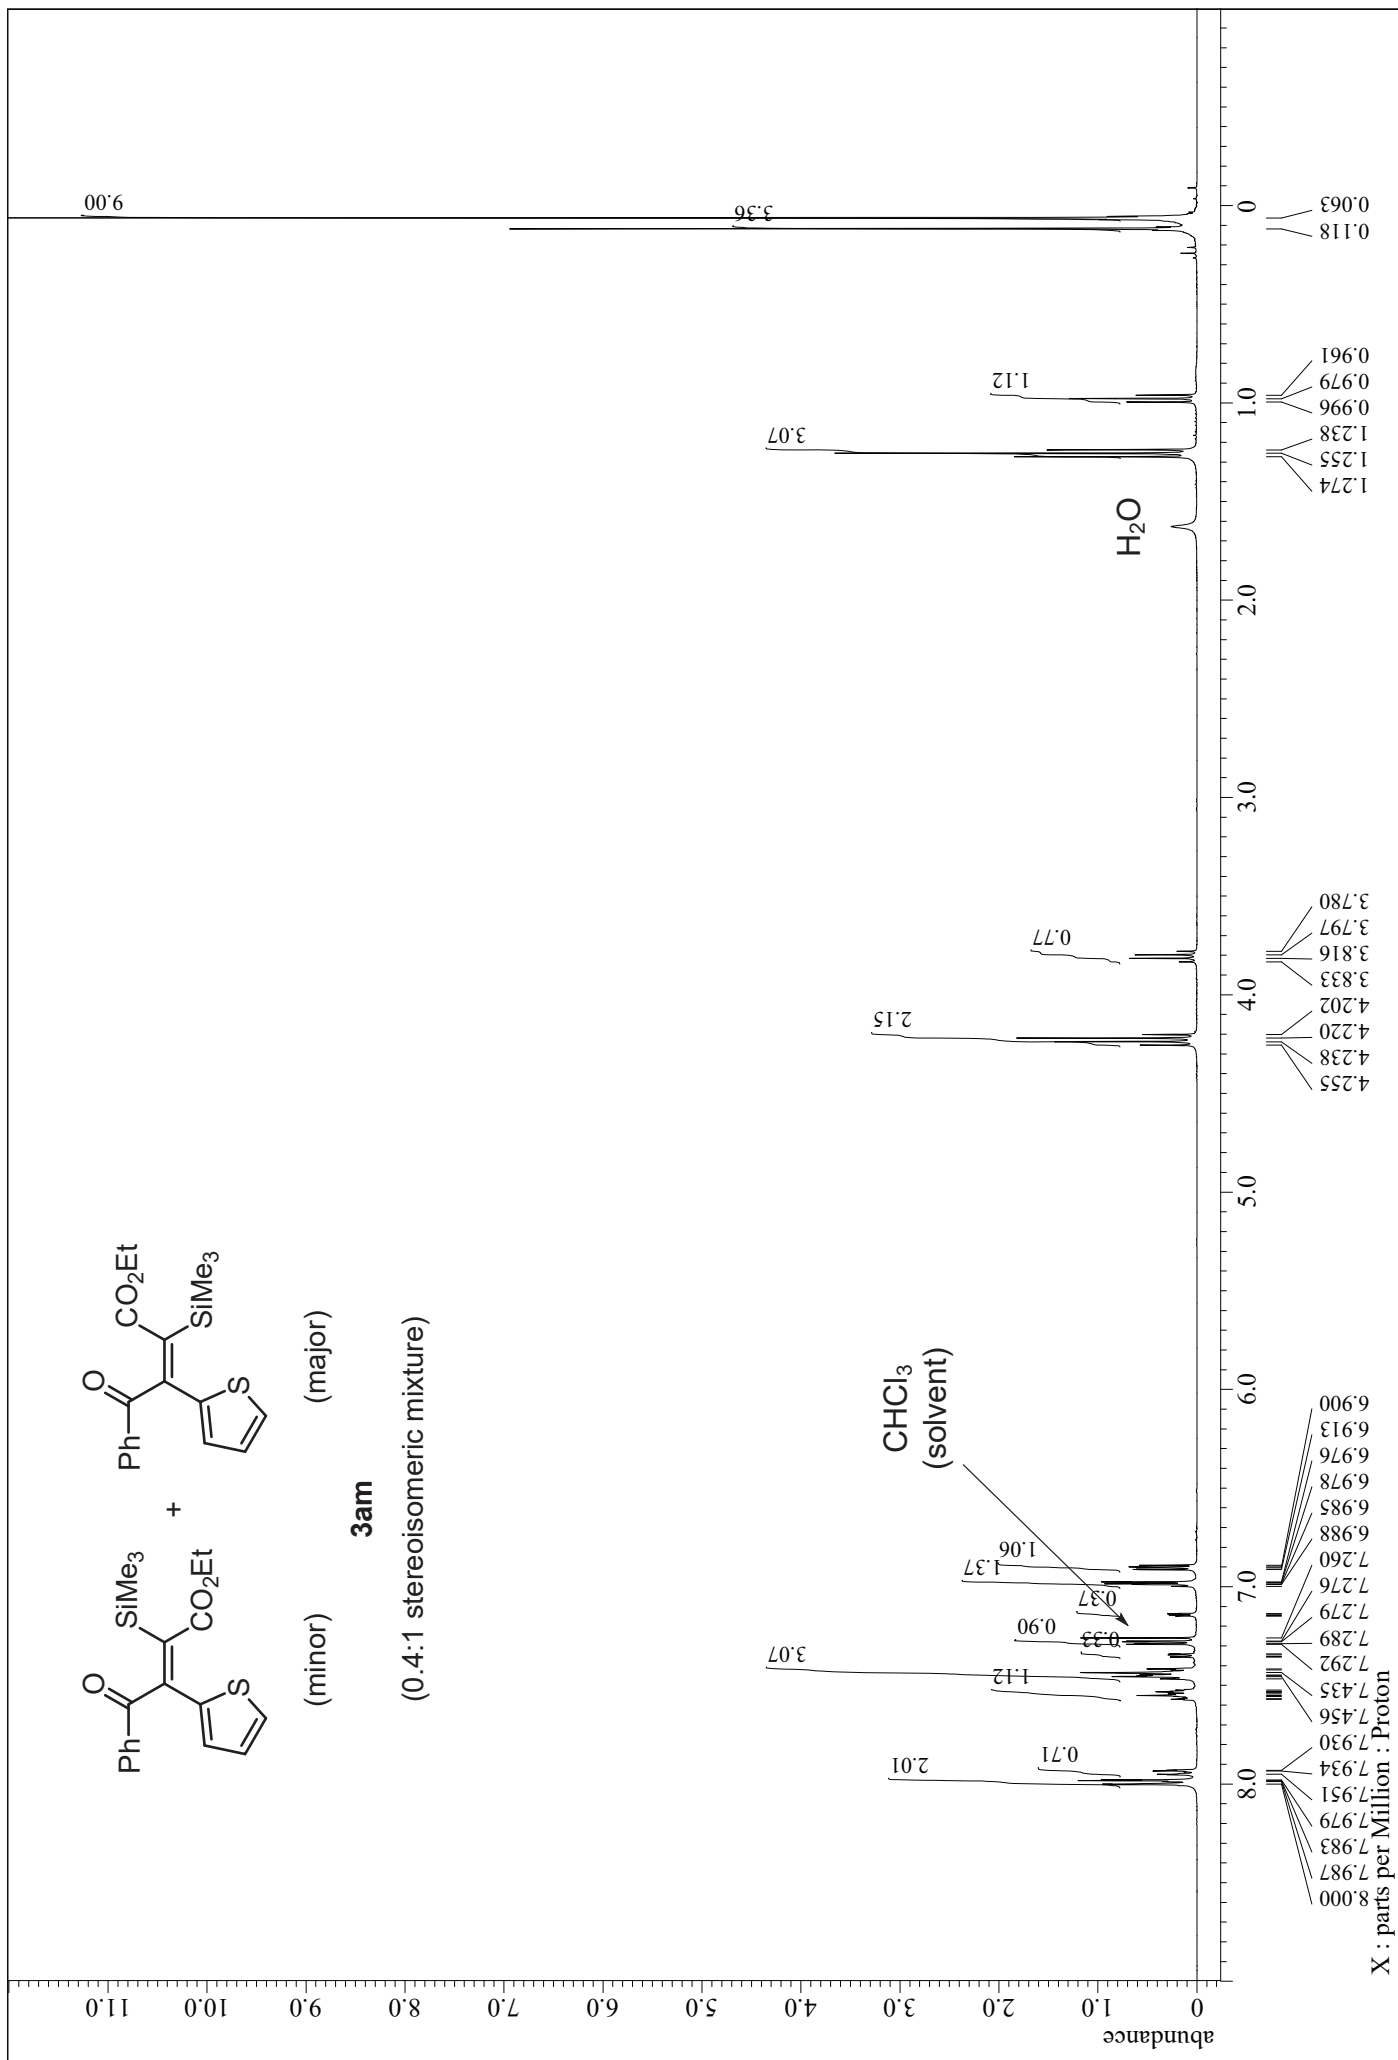

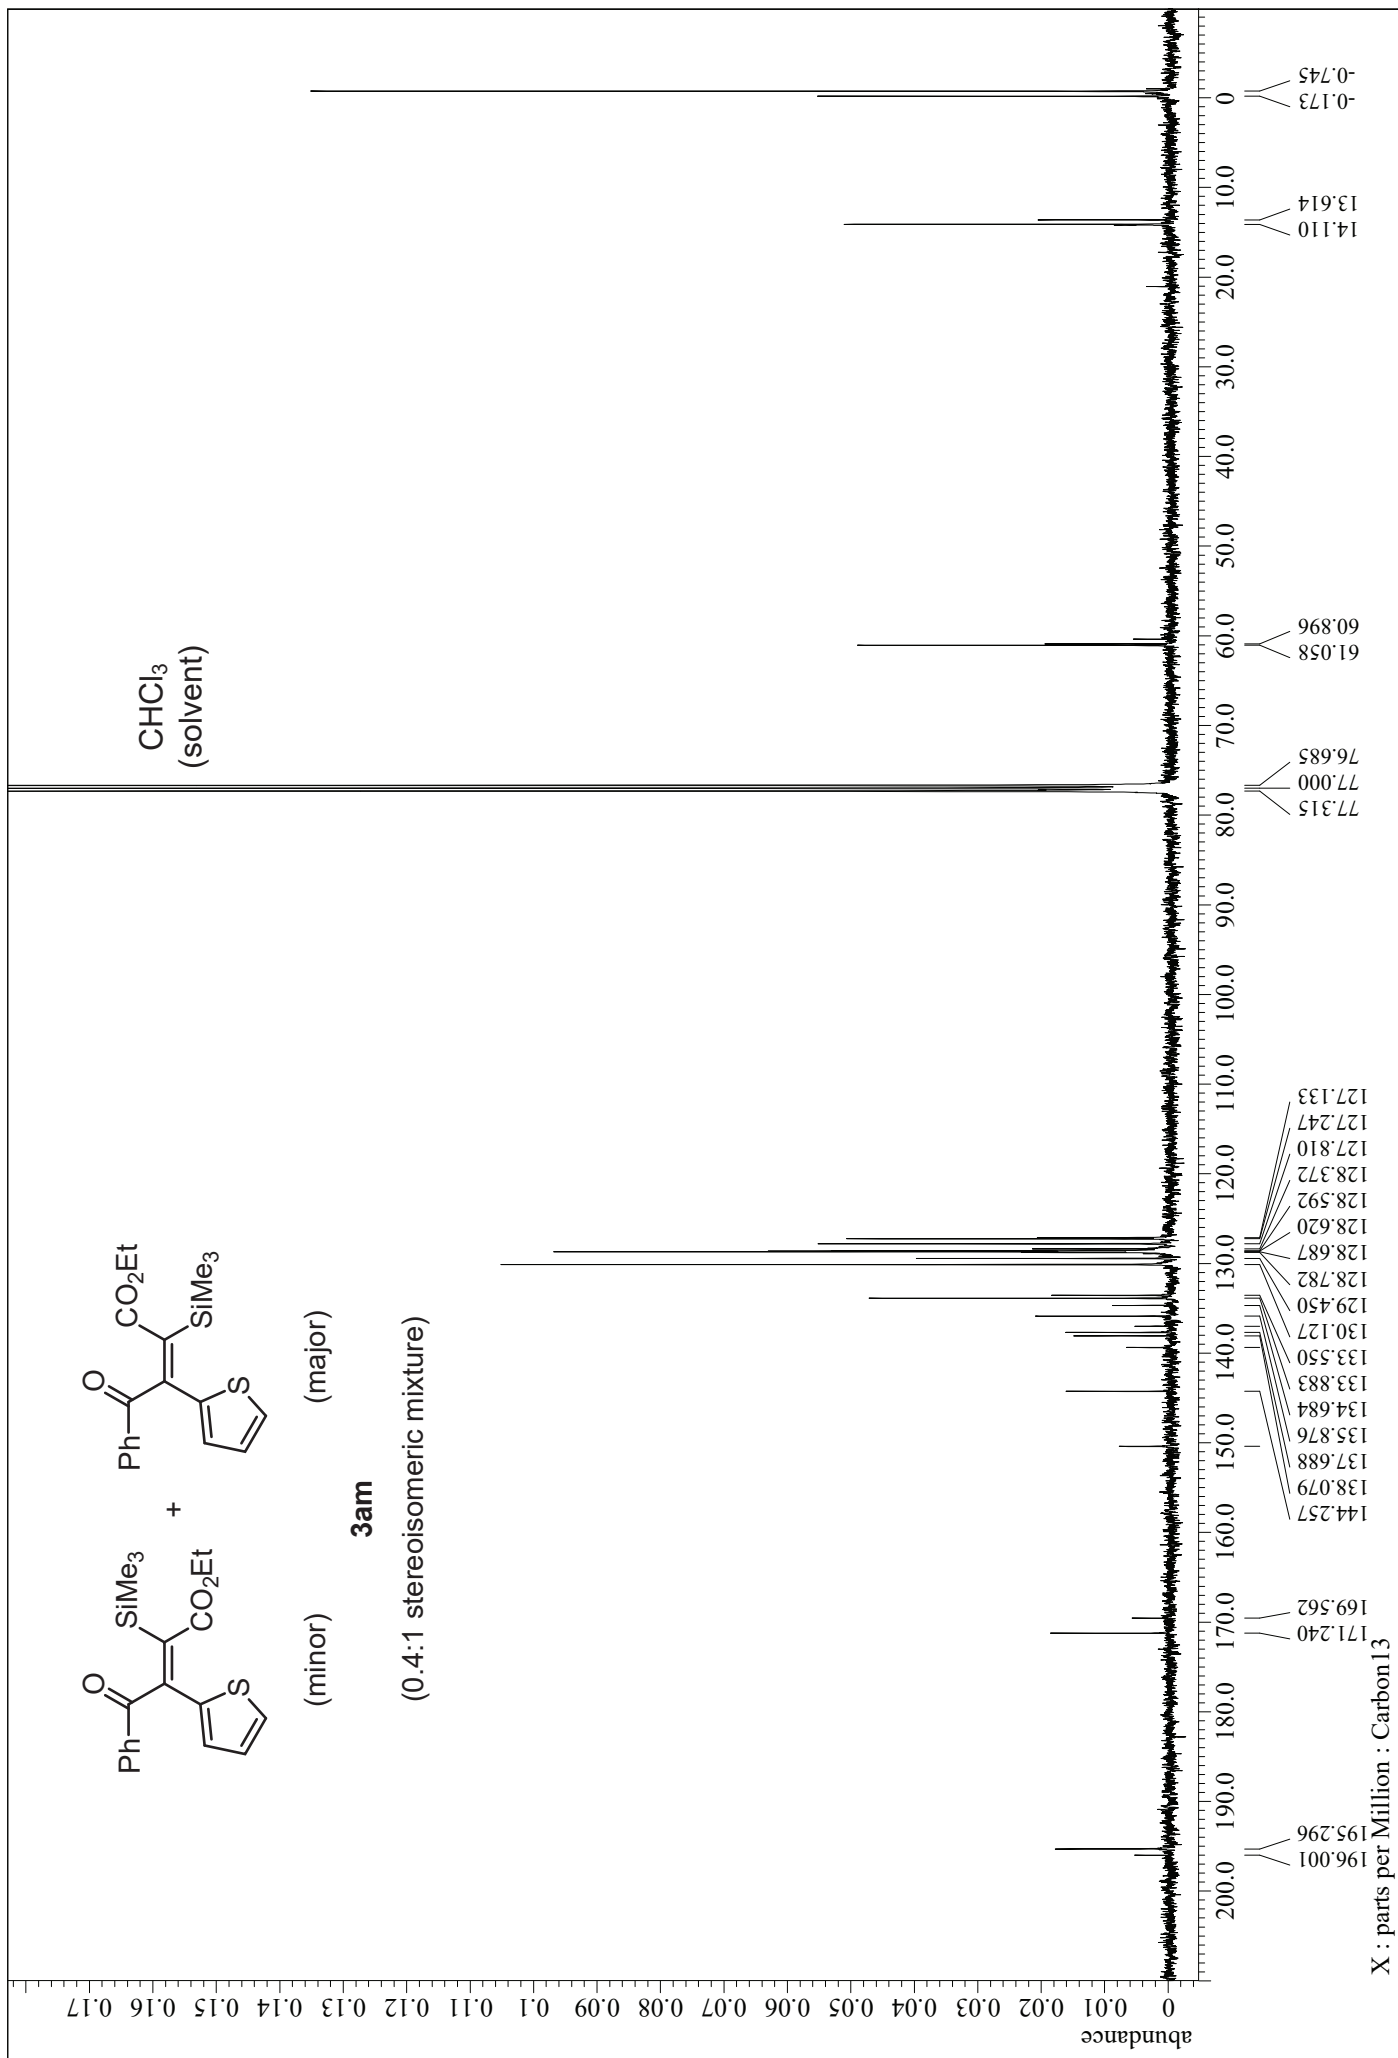

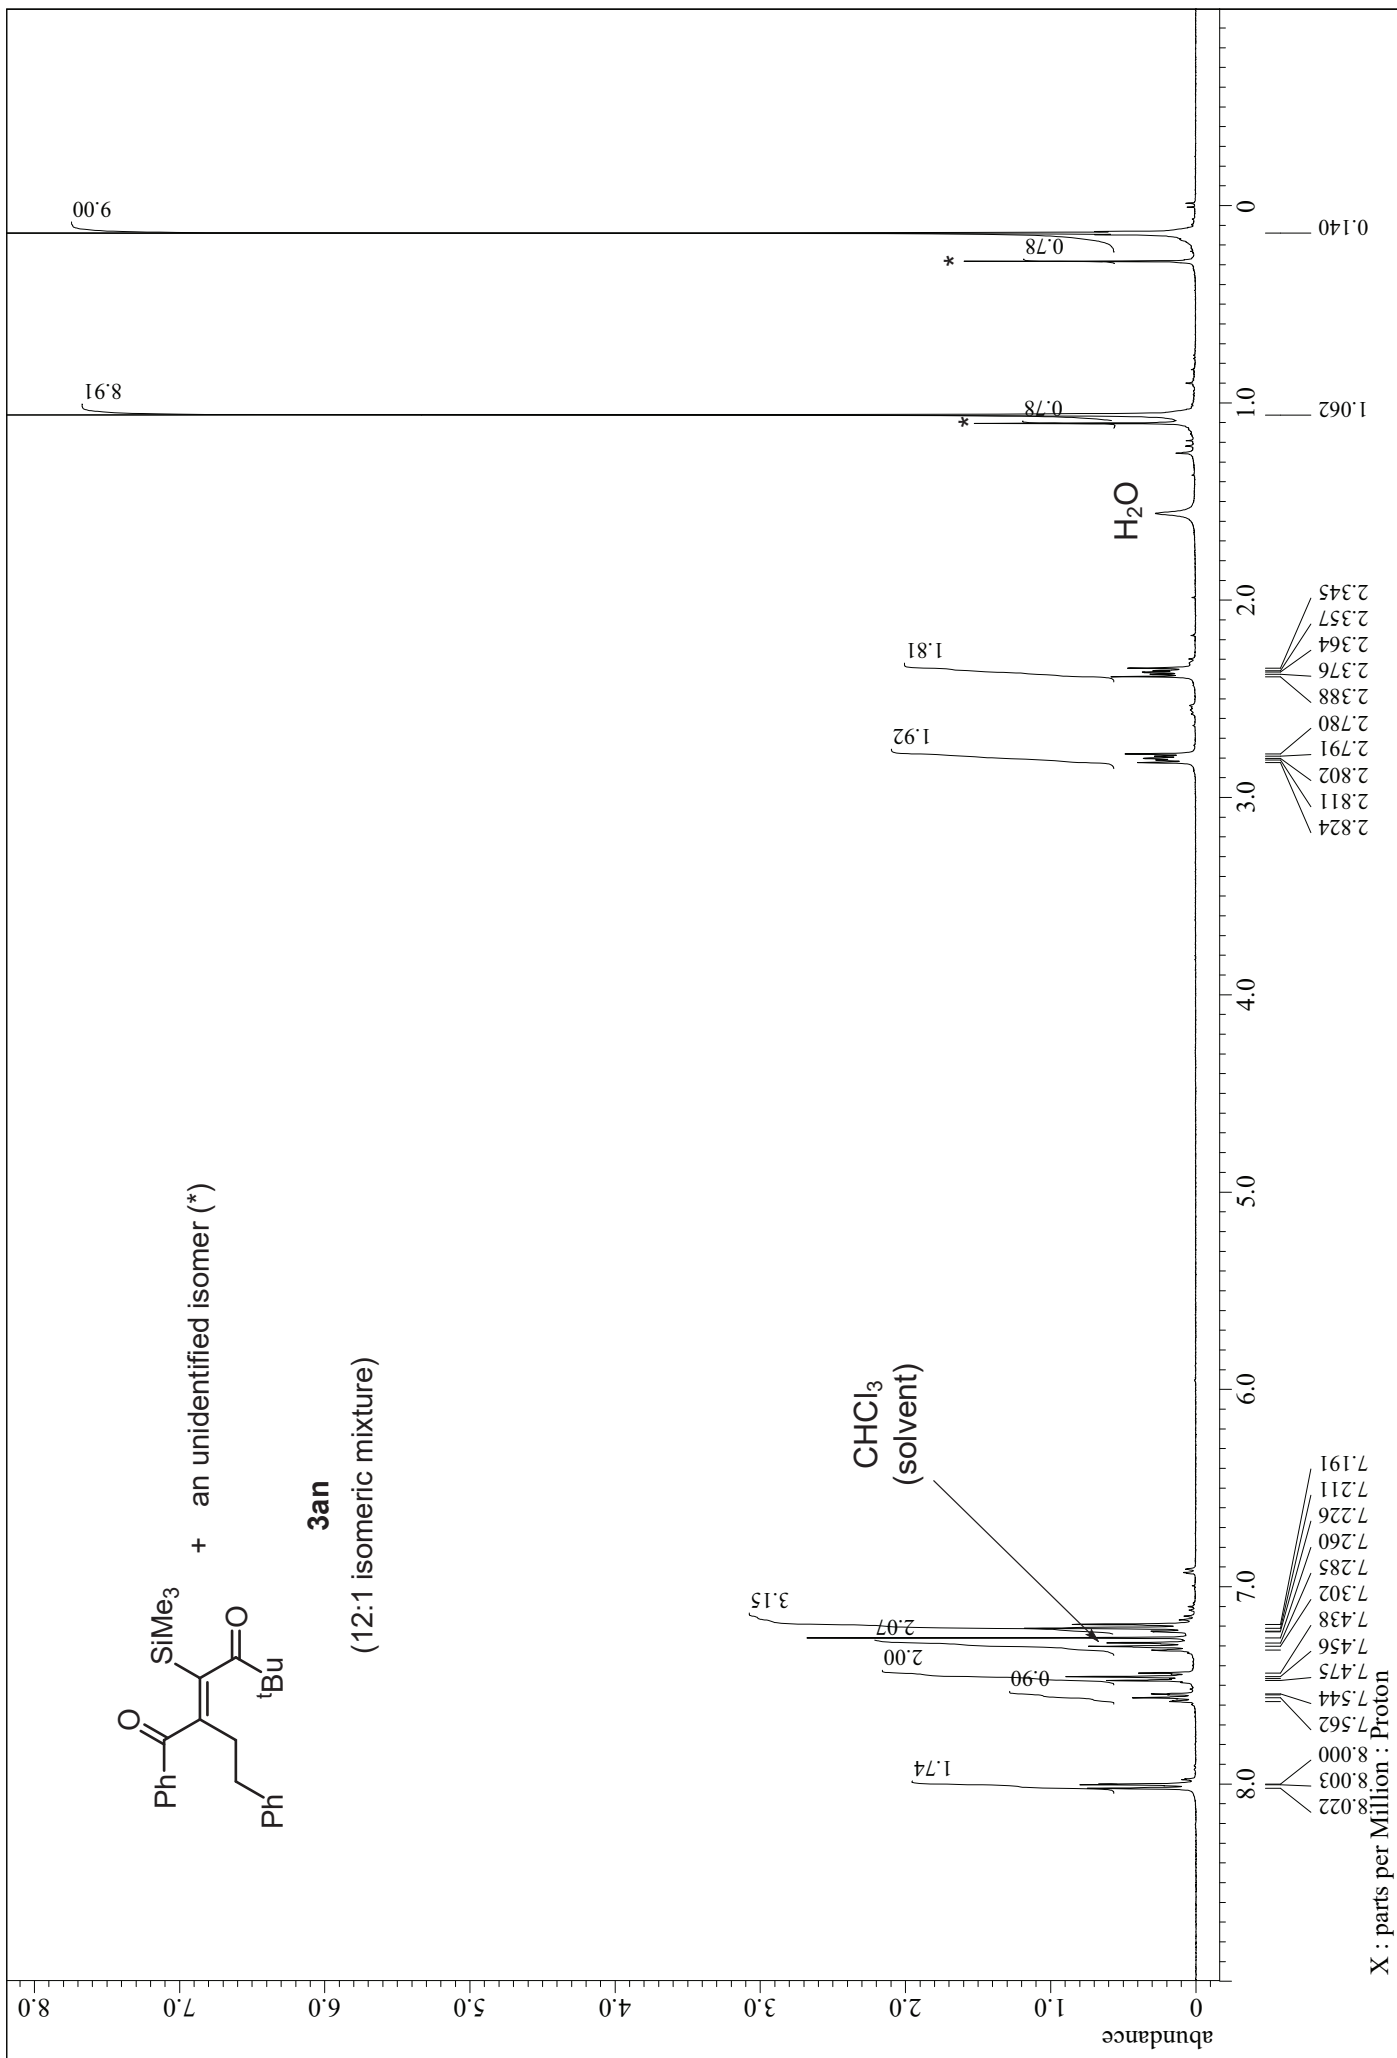

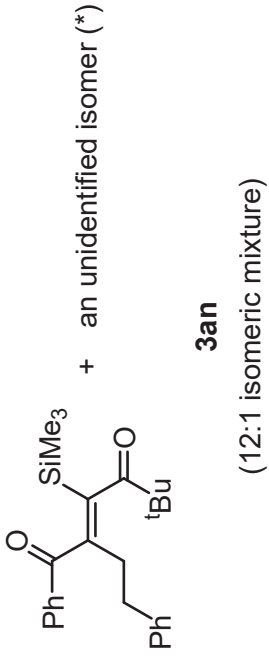

CHCl<sub>3</sub>  
(solvent)

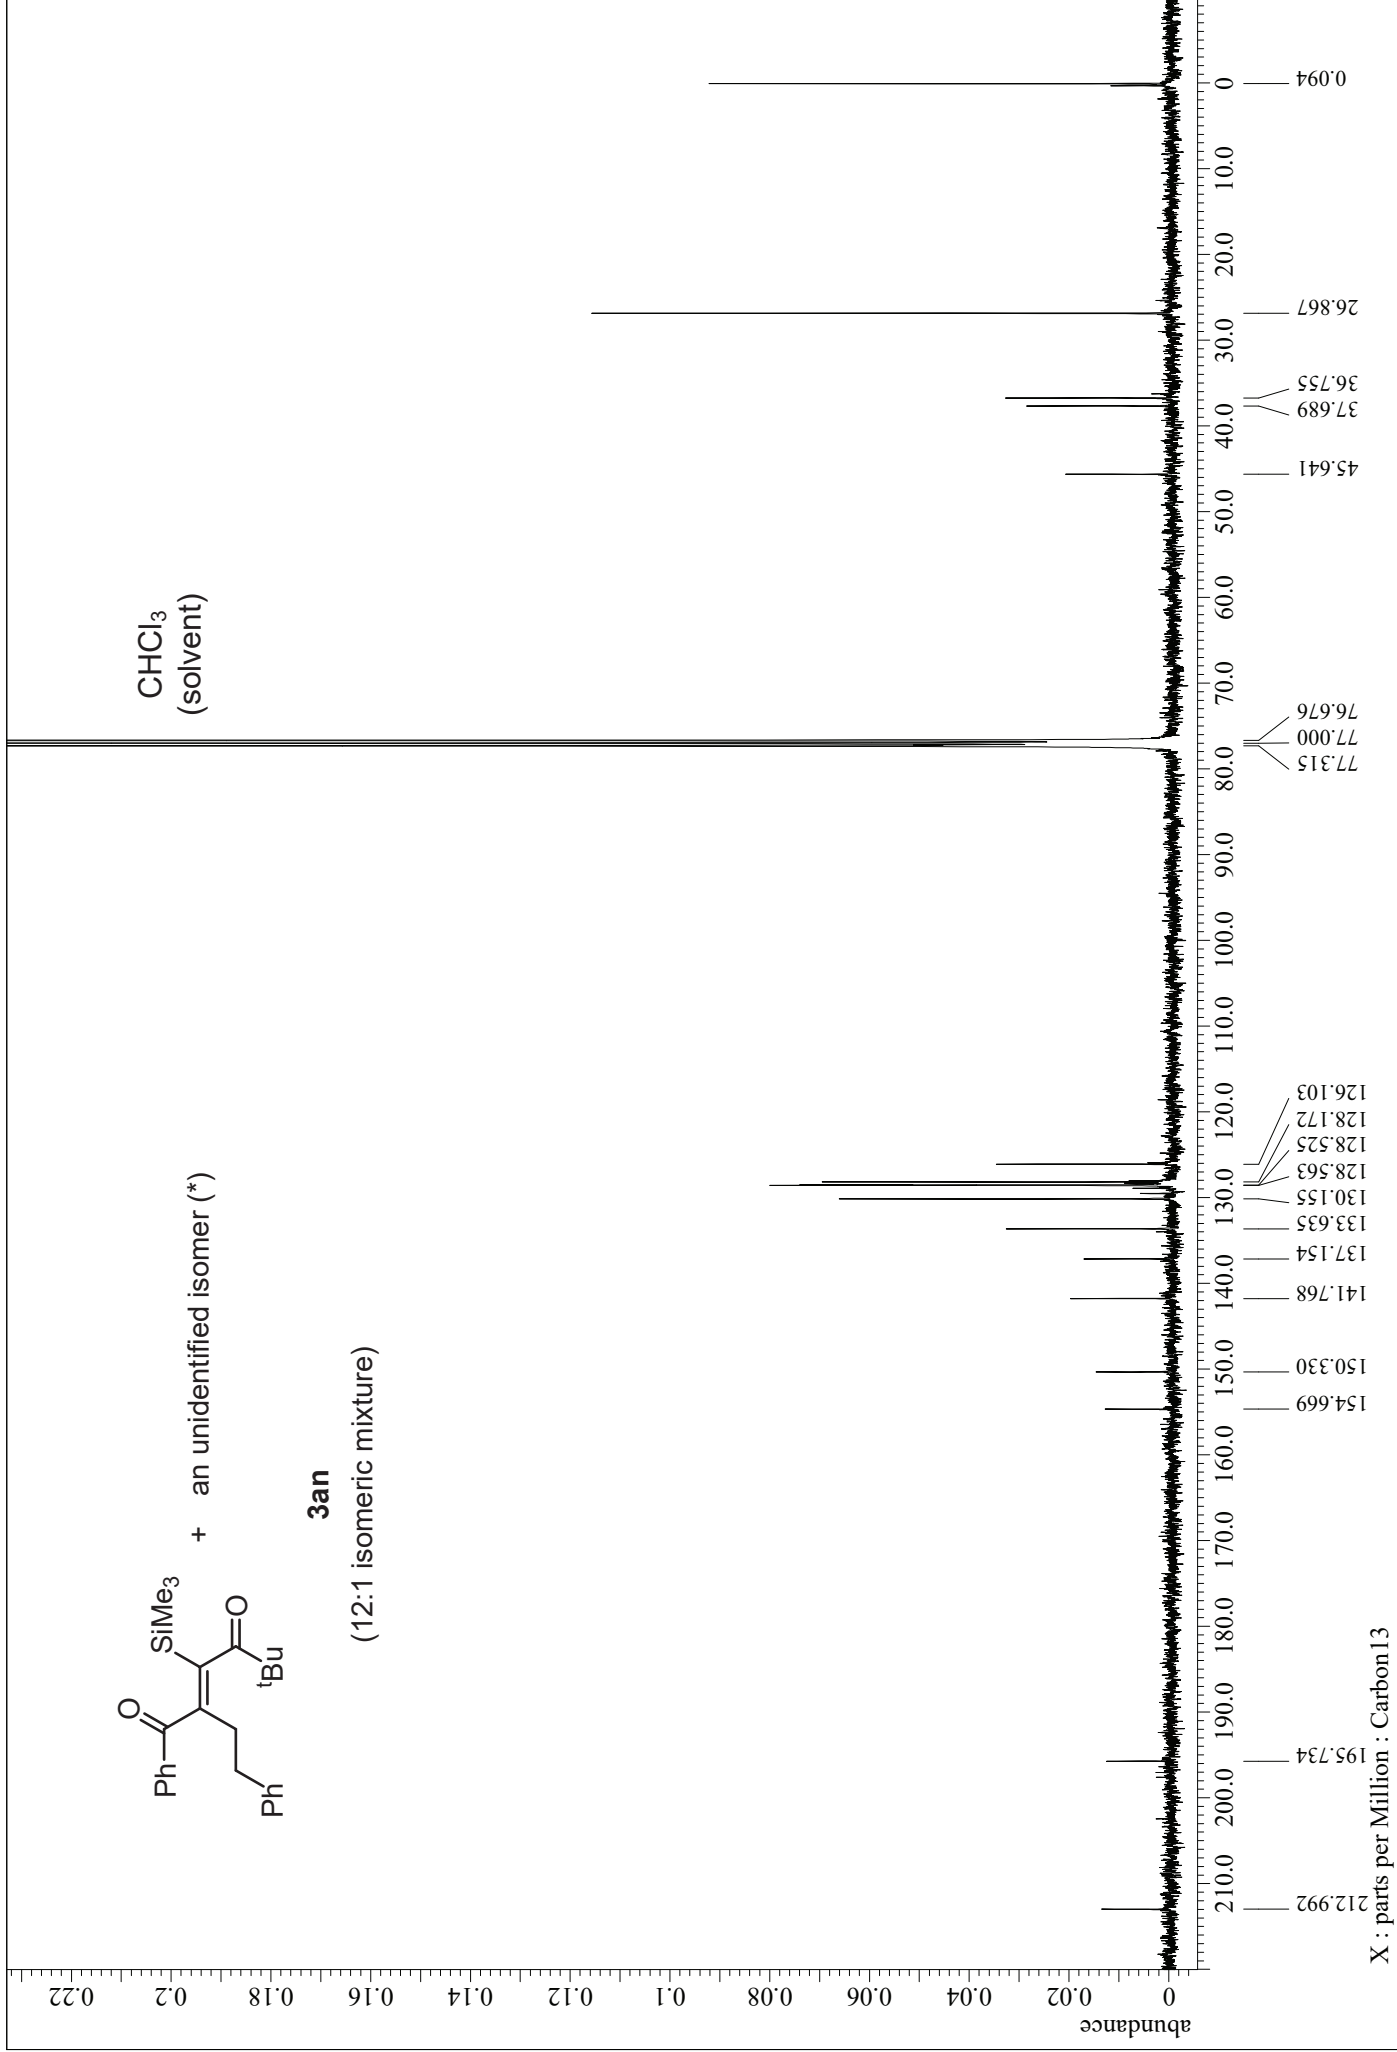



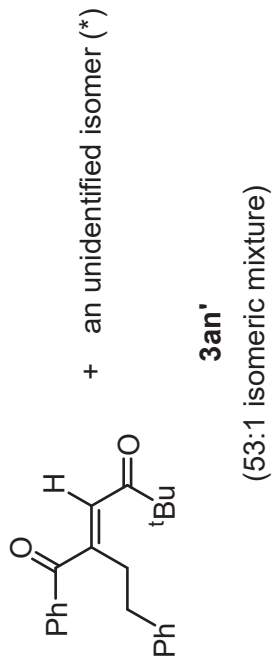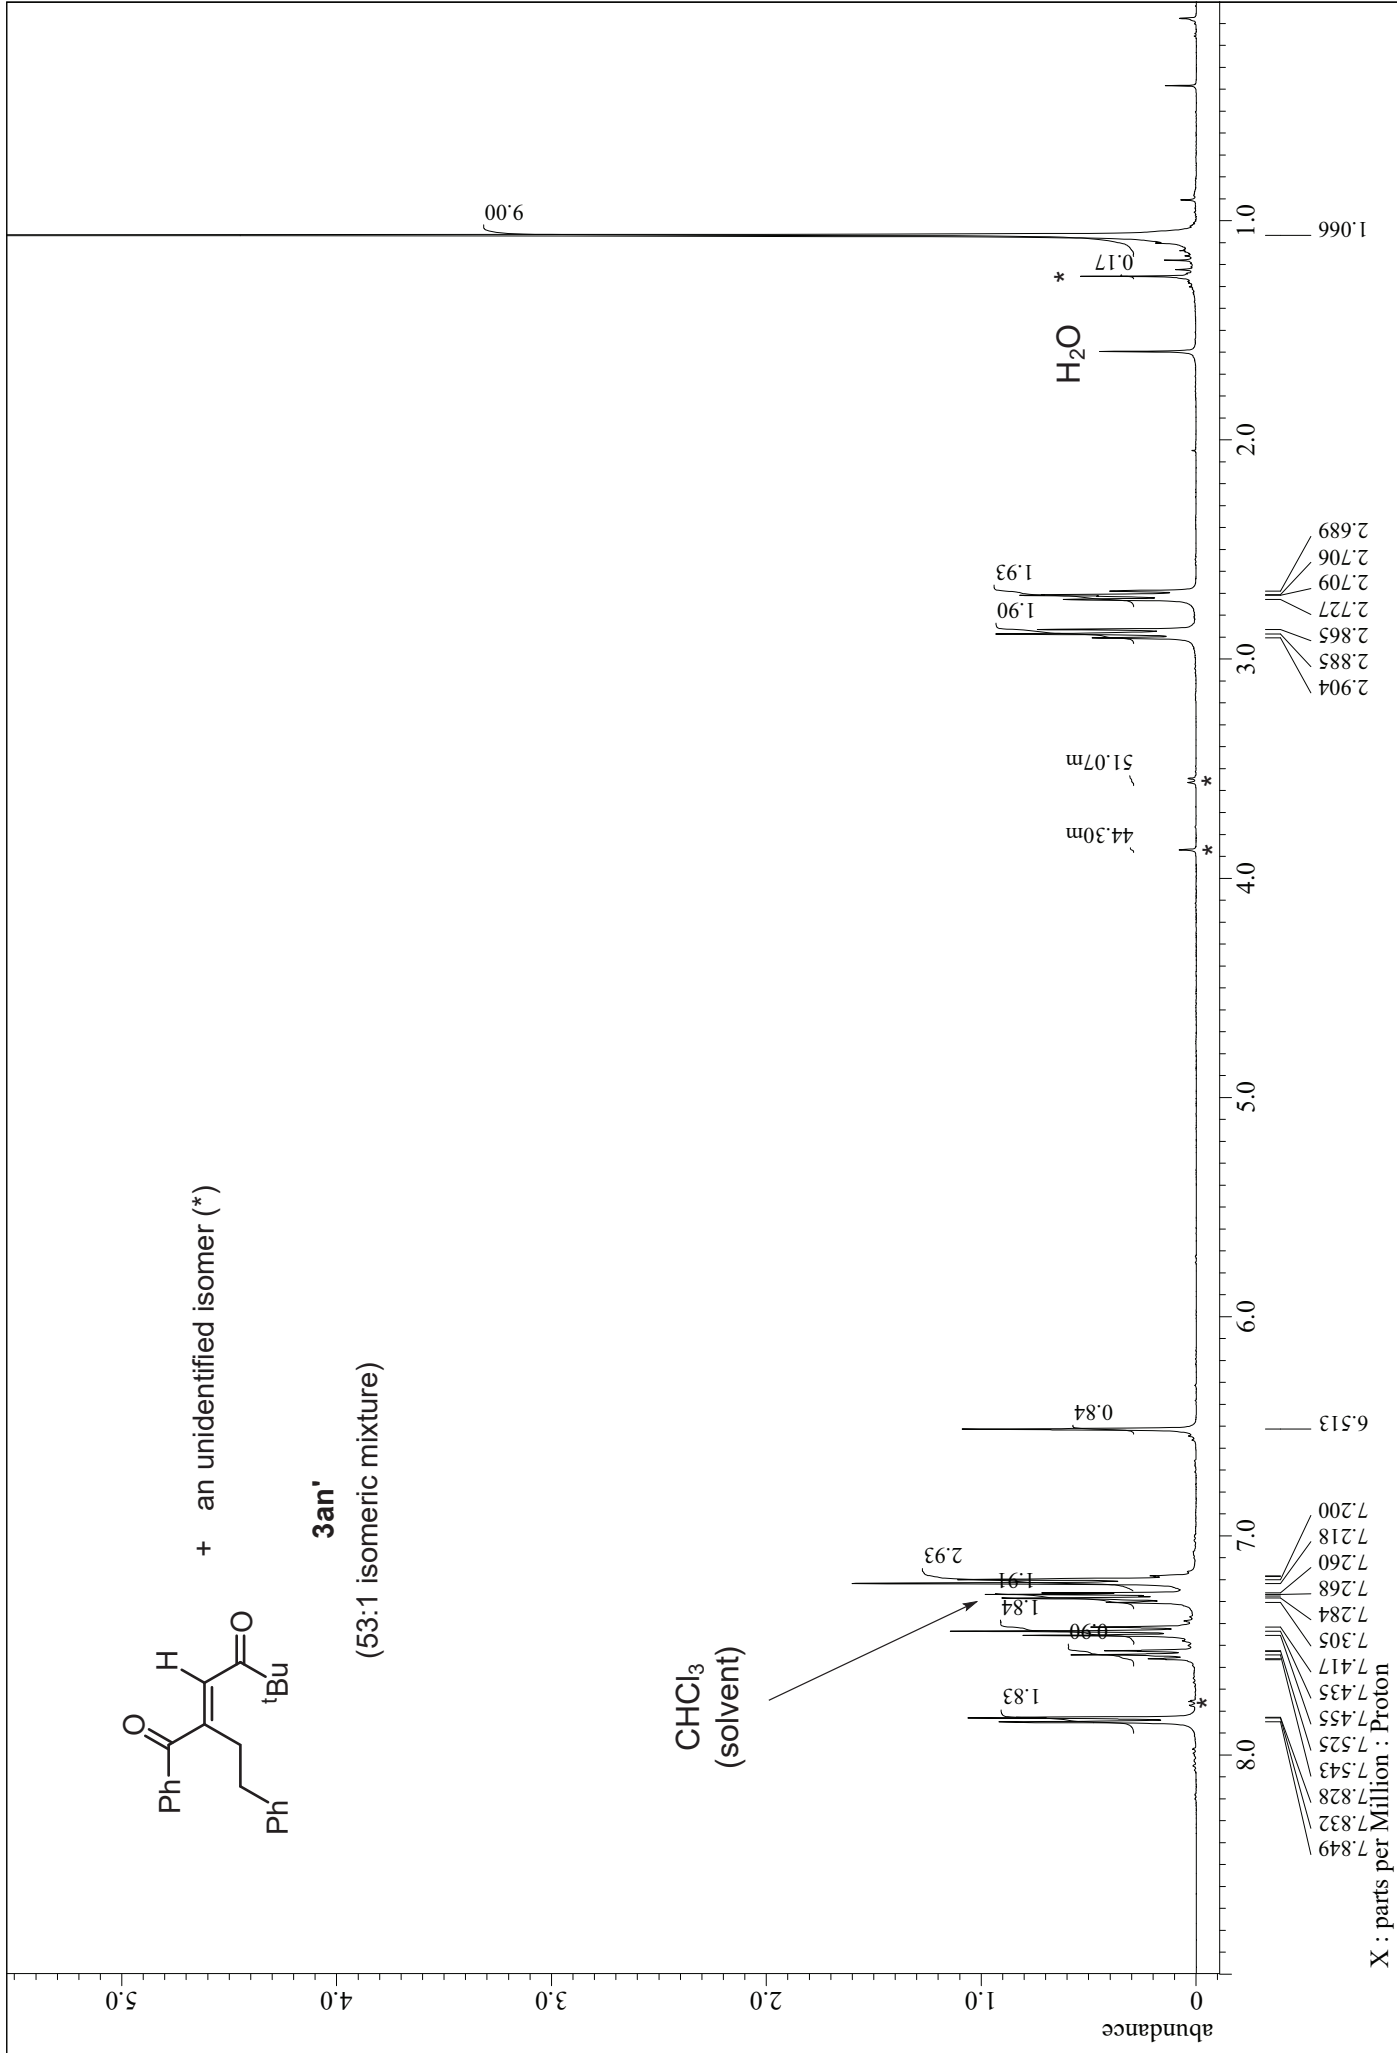

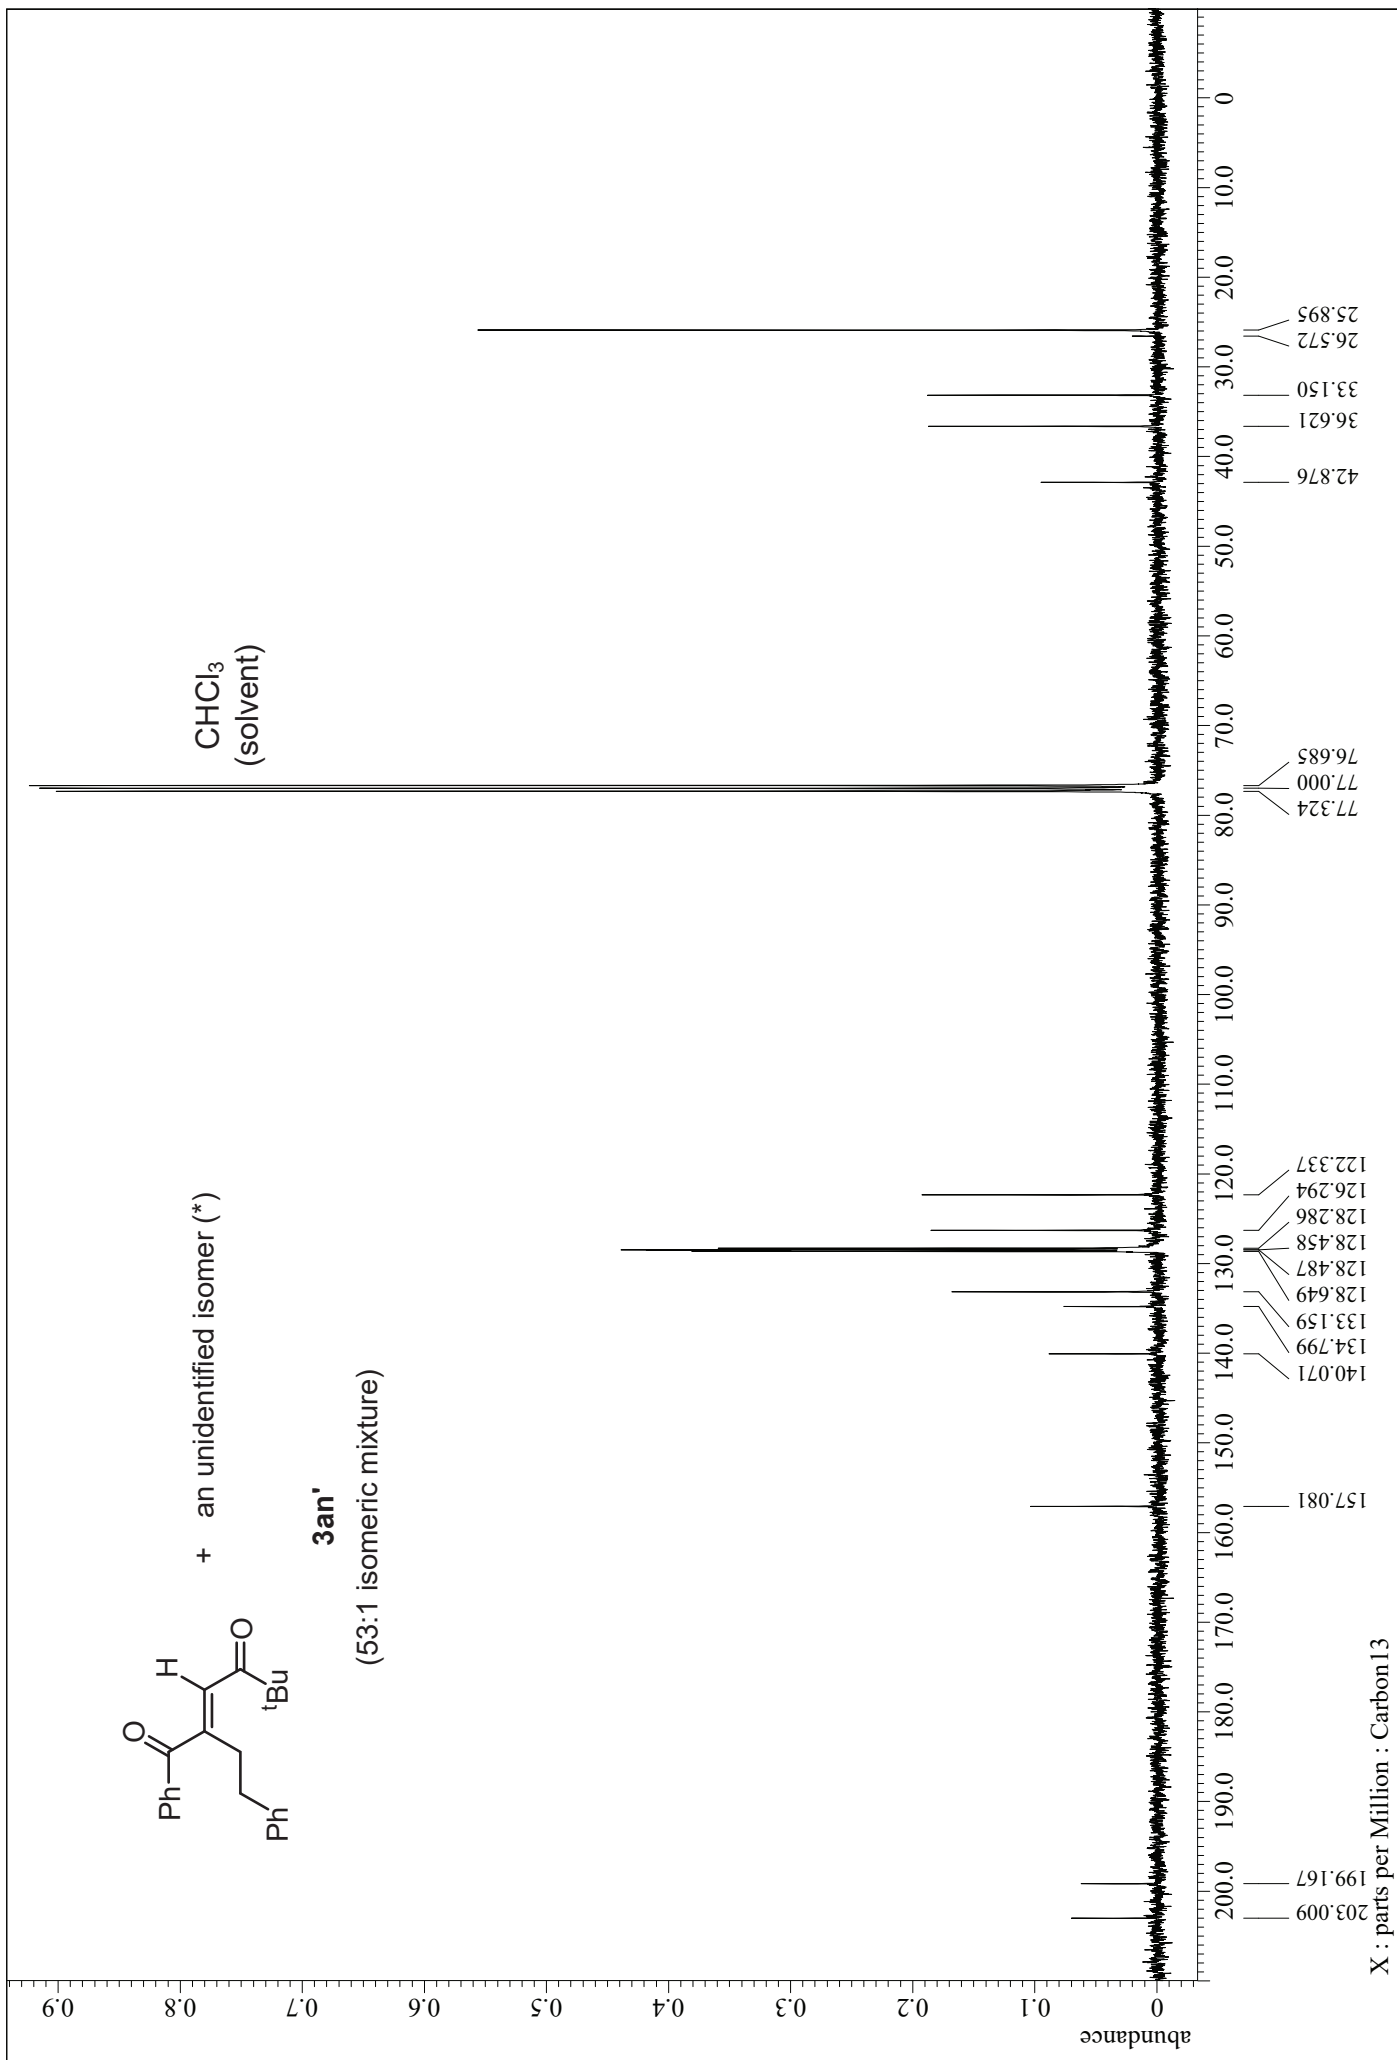

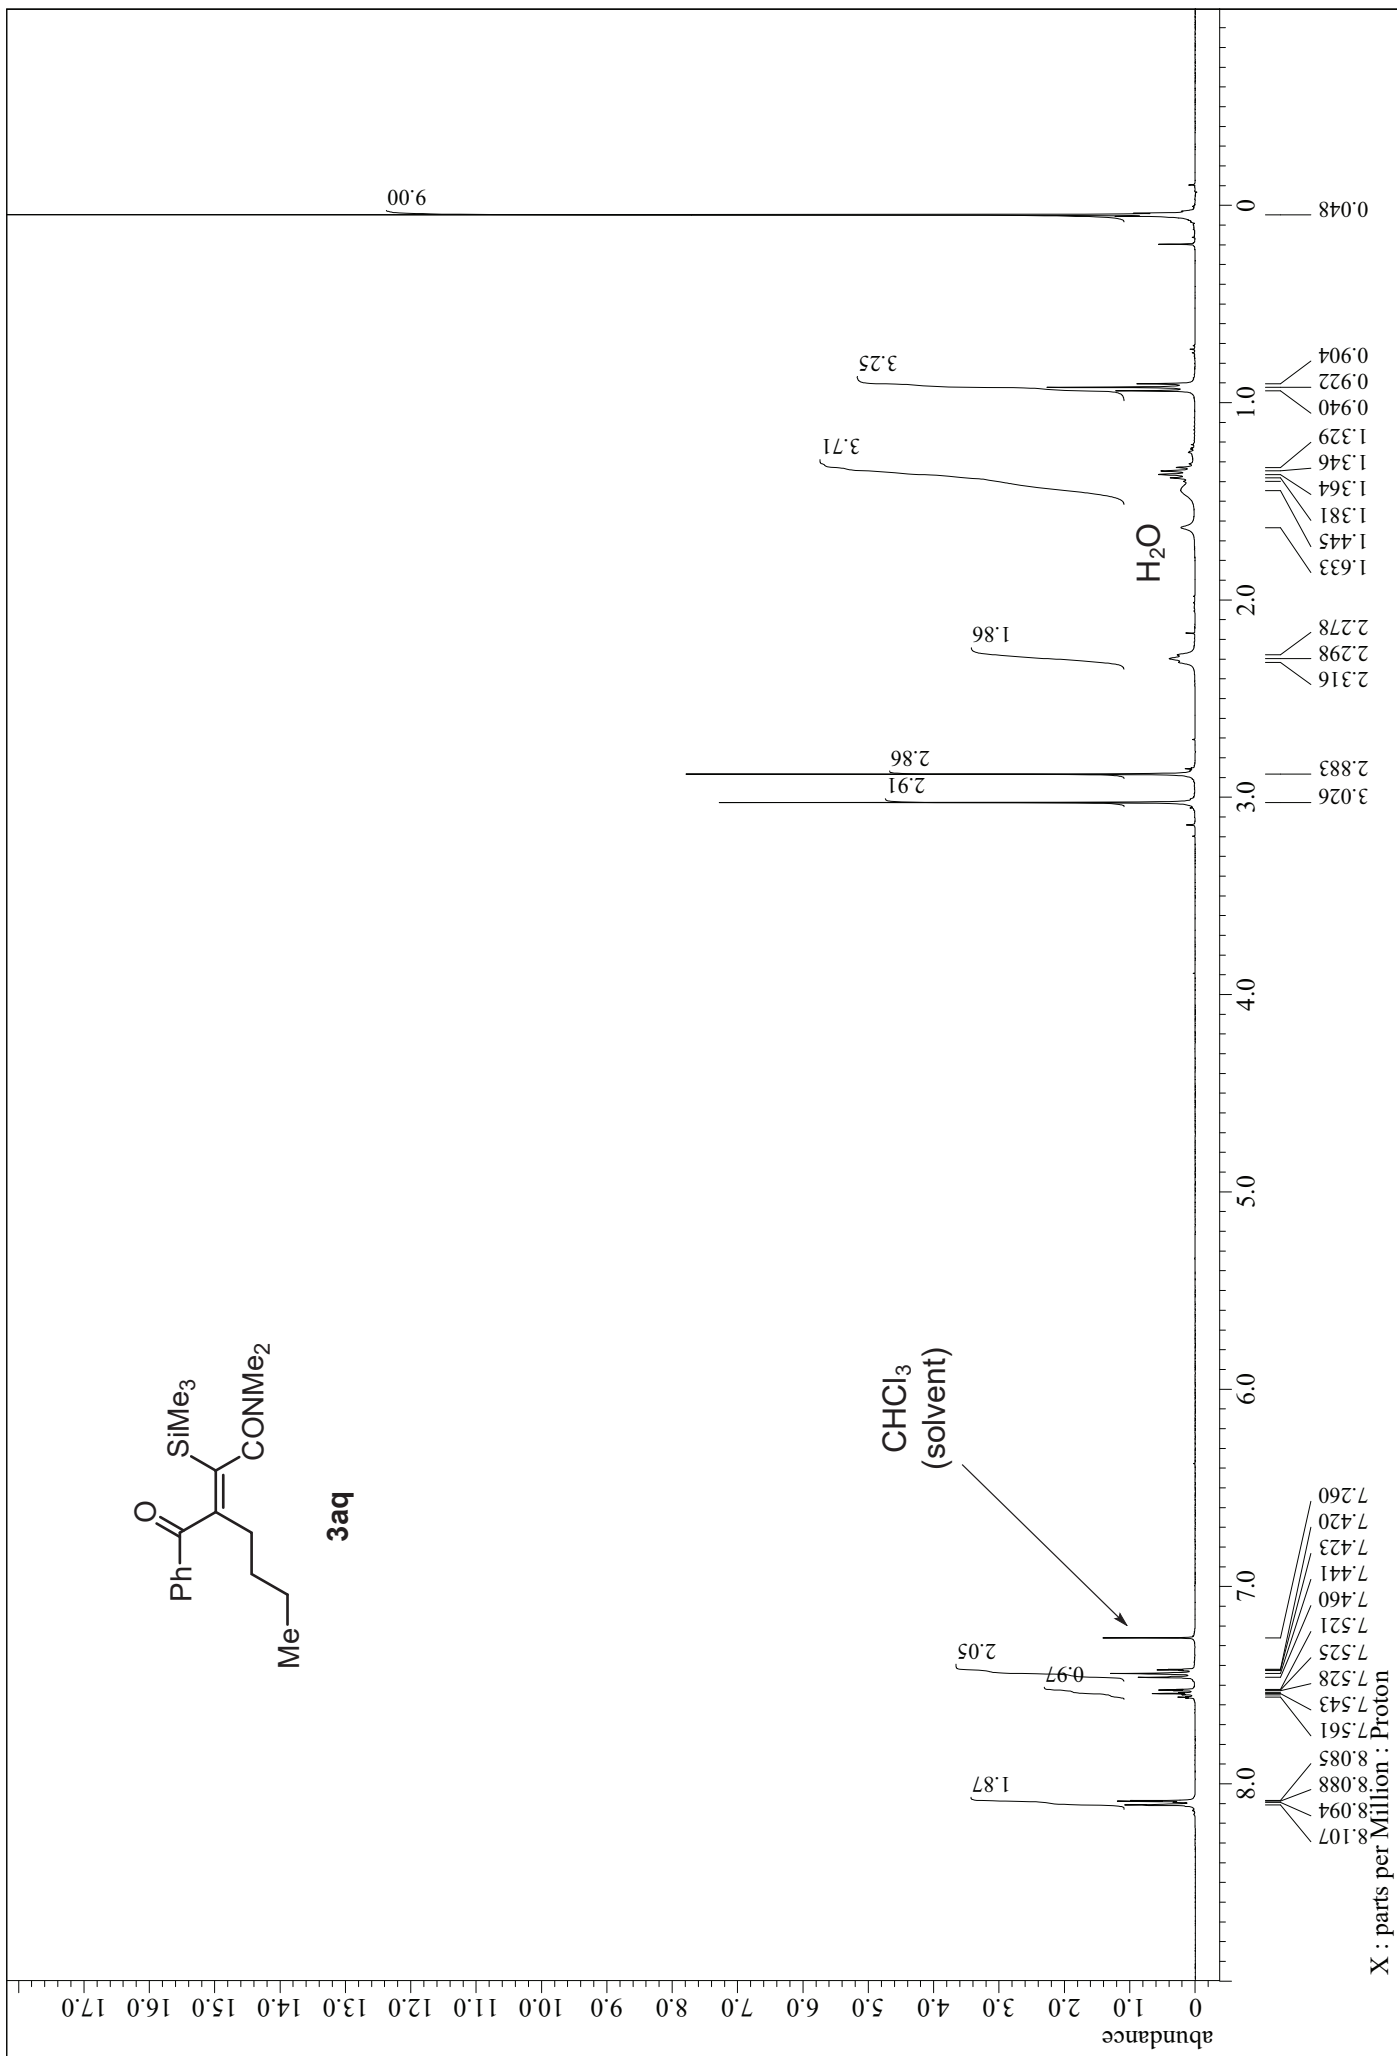

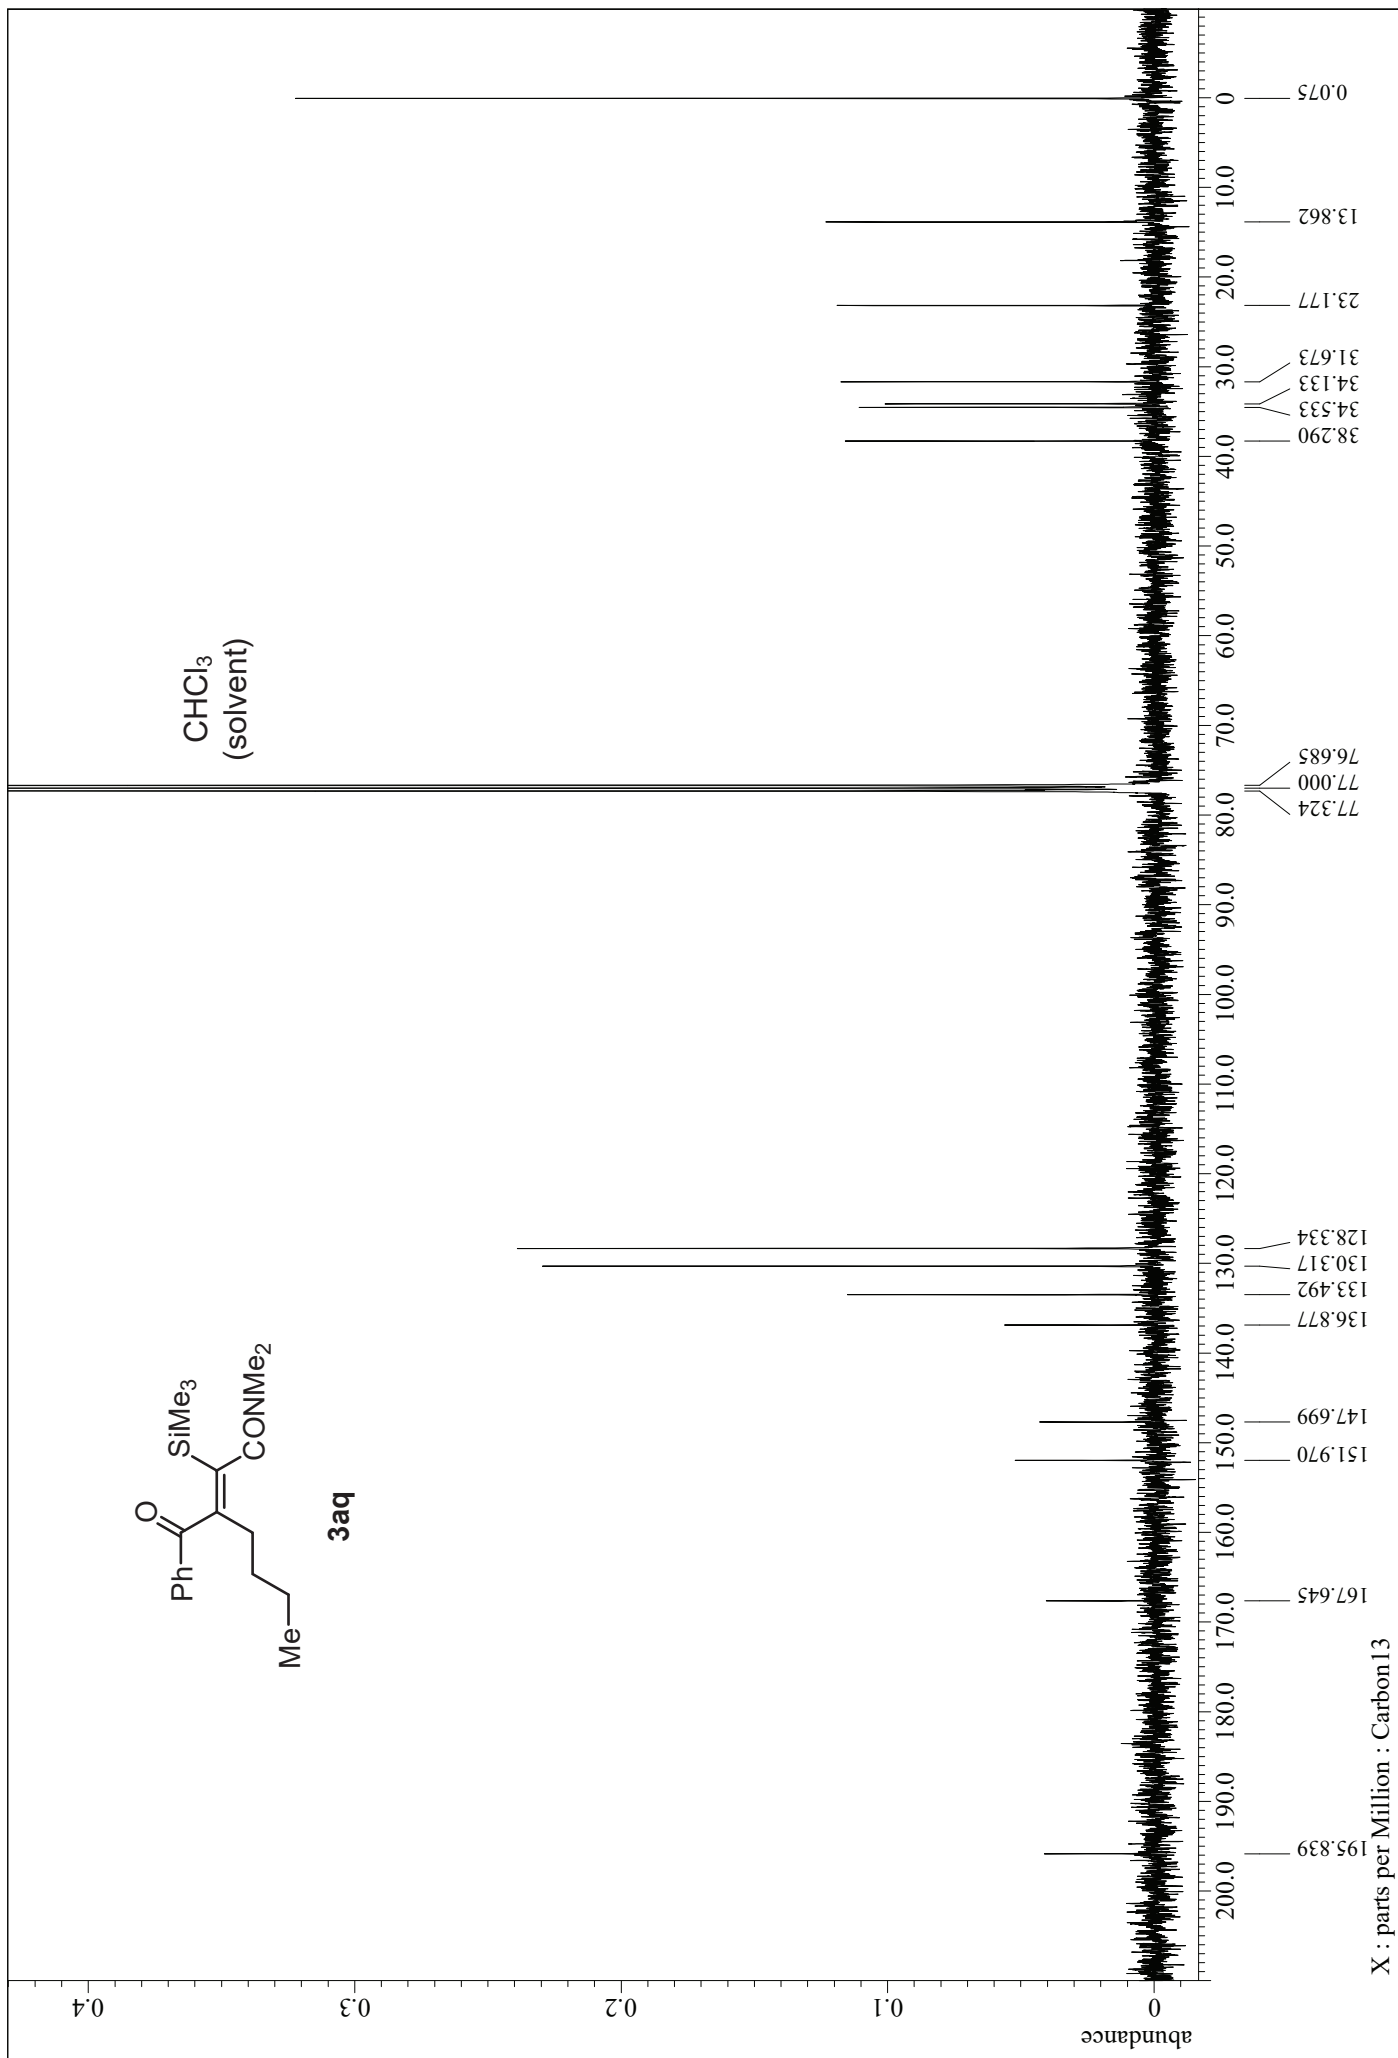

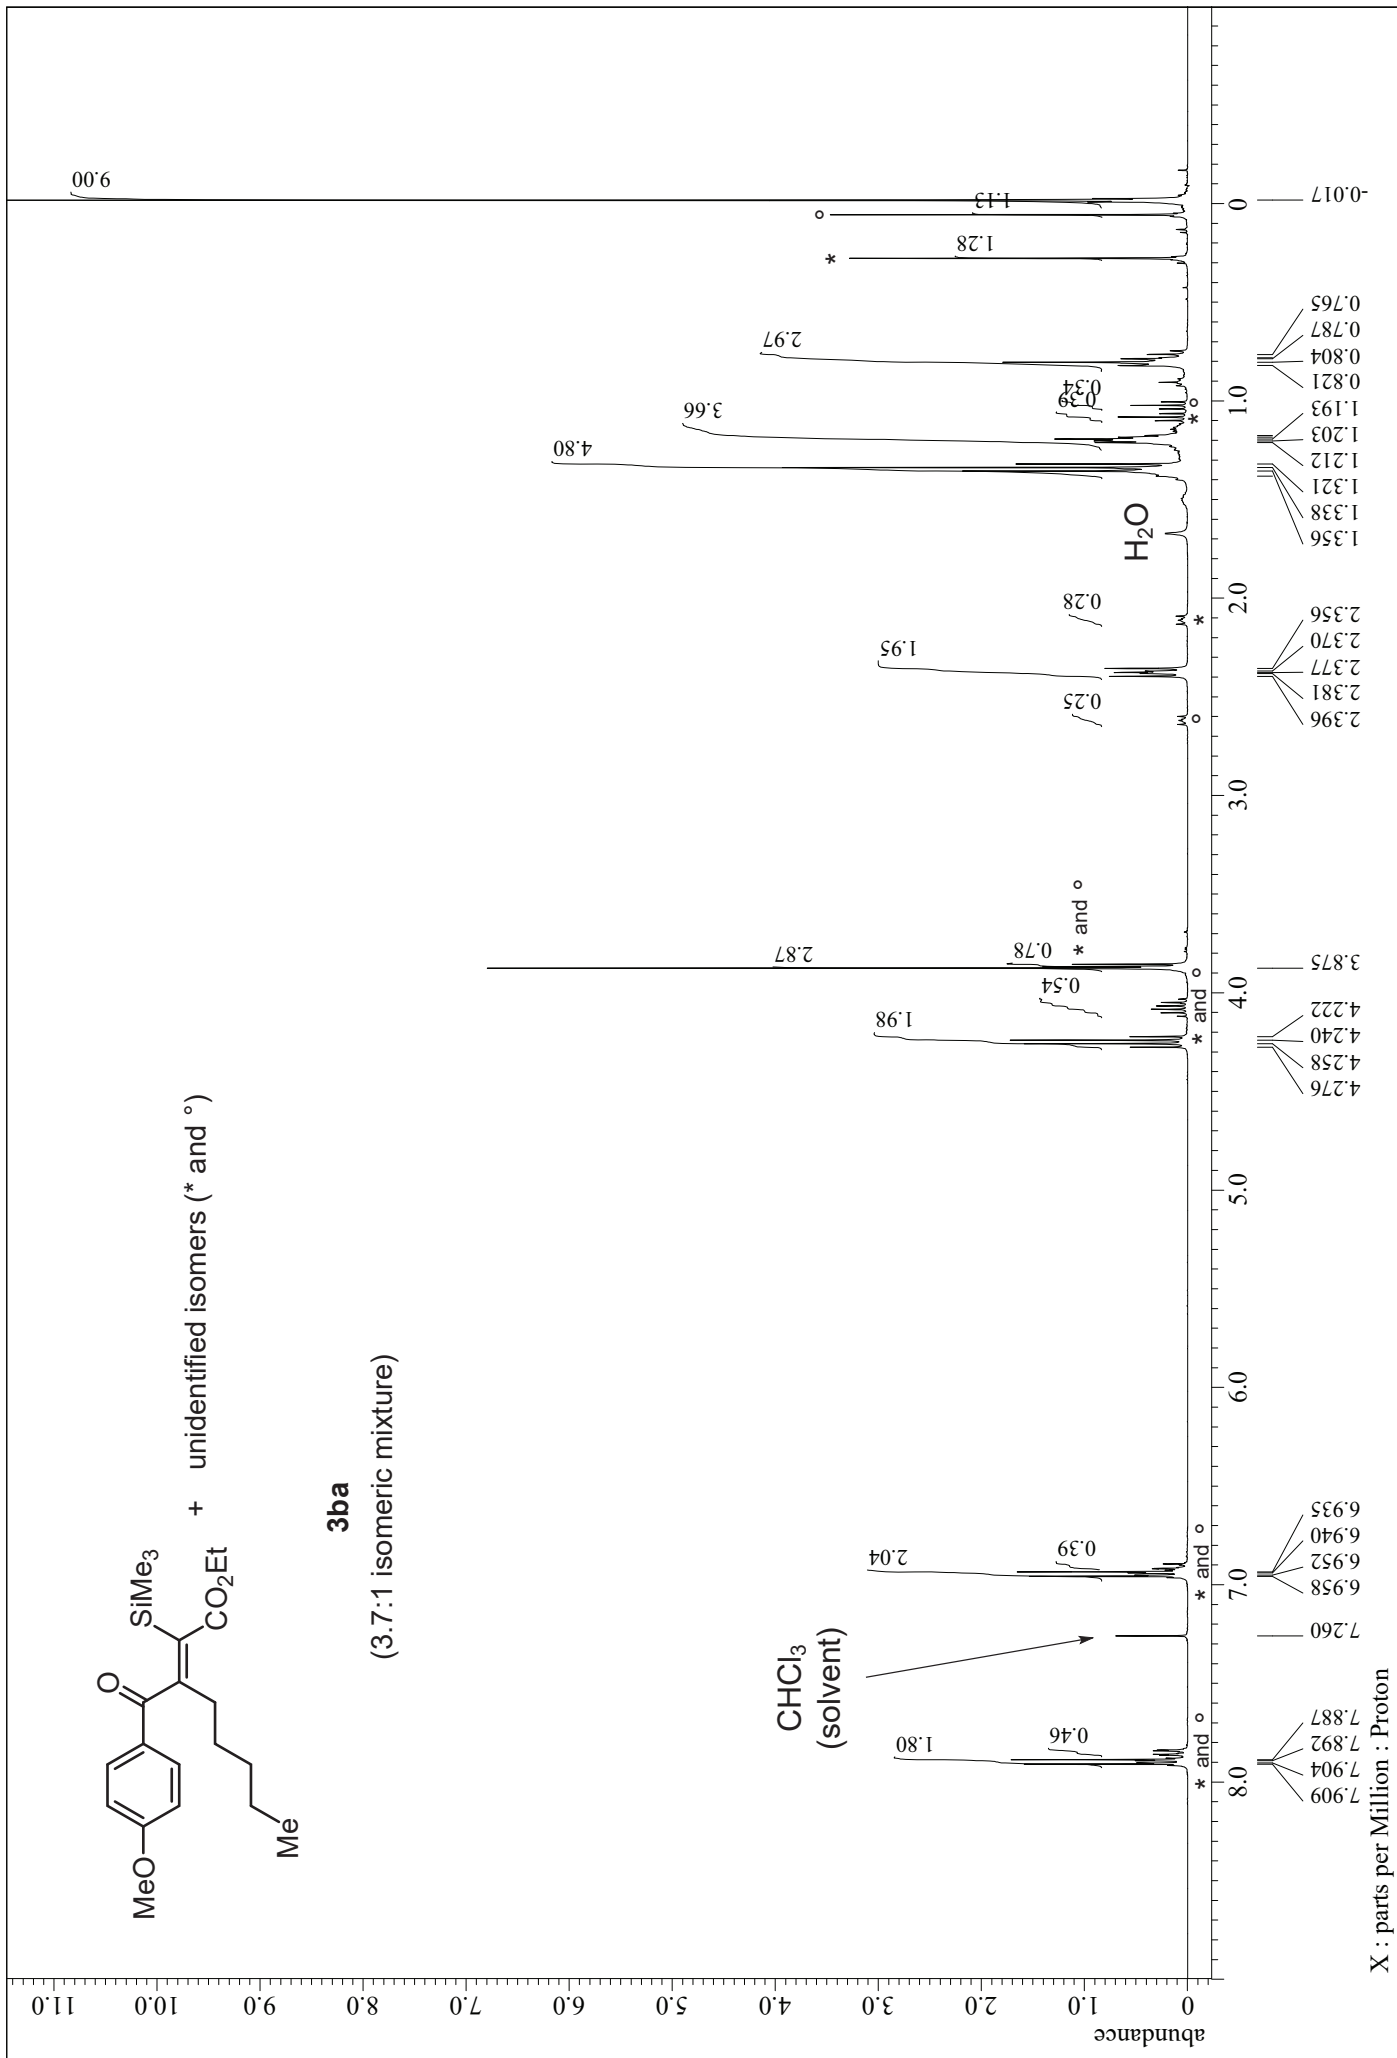

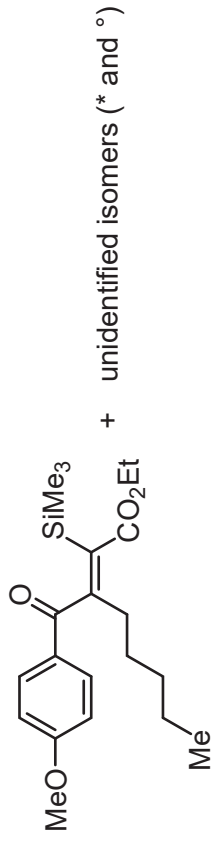

**3ba**  
(3.7:1 isomeric mixture)

CHCl<sub>3</sub>  
(solvent)

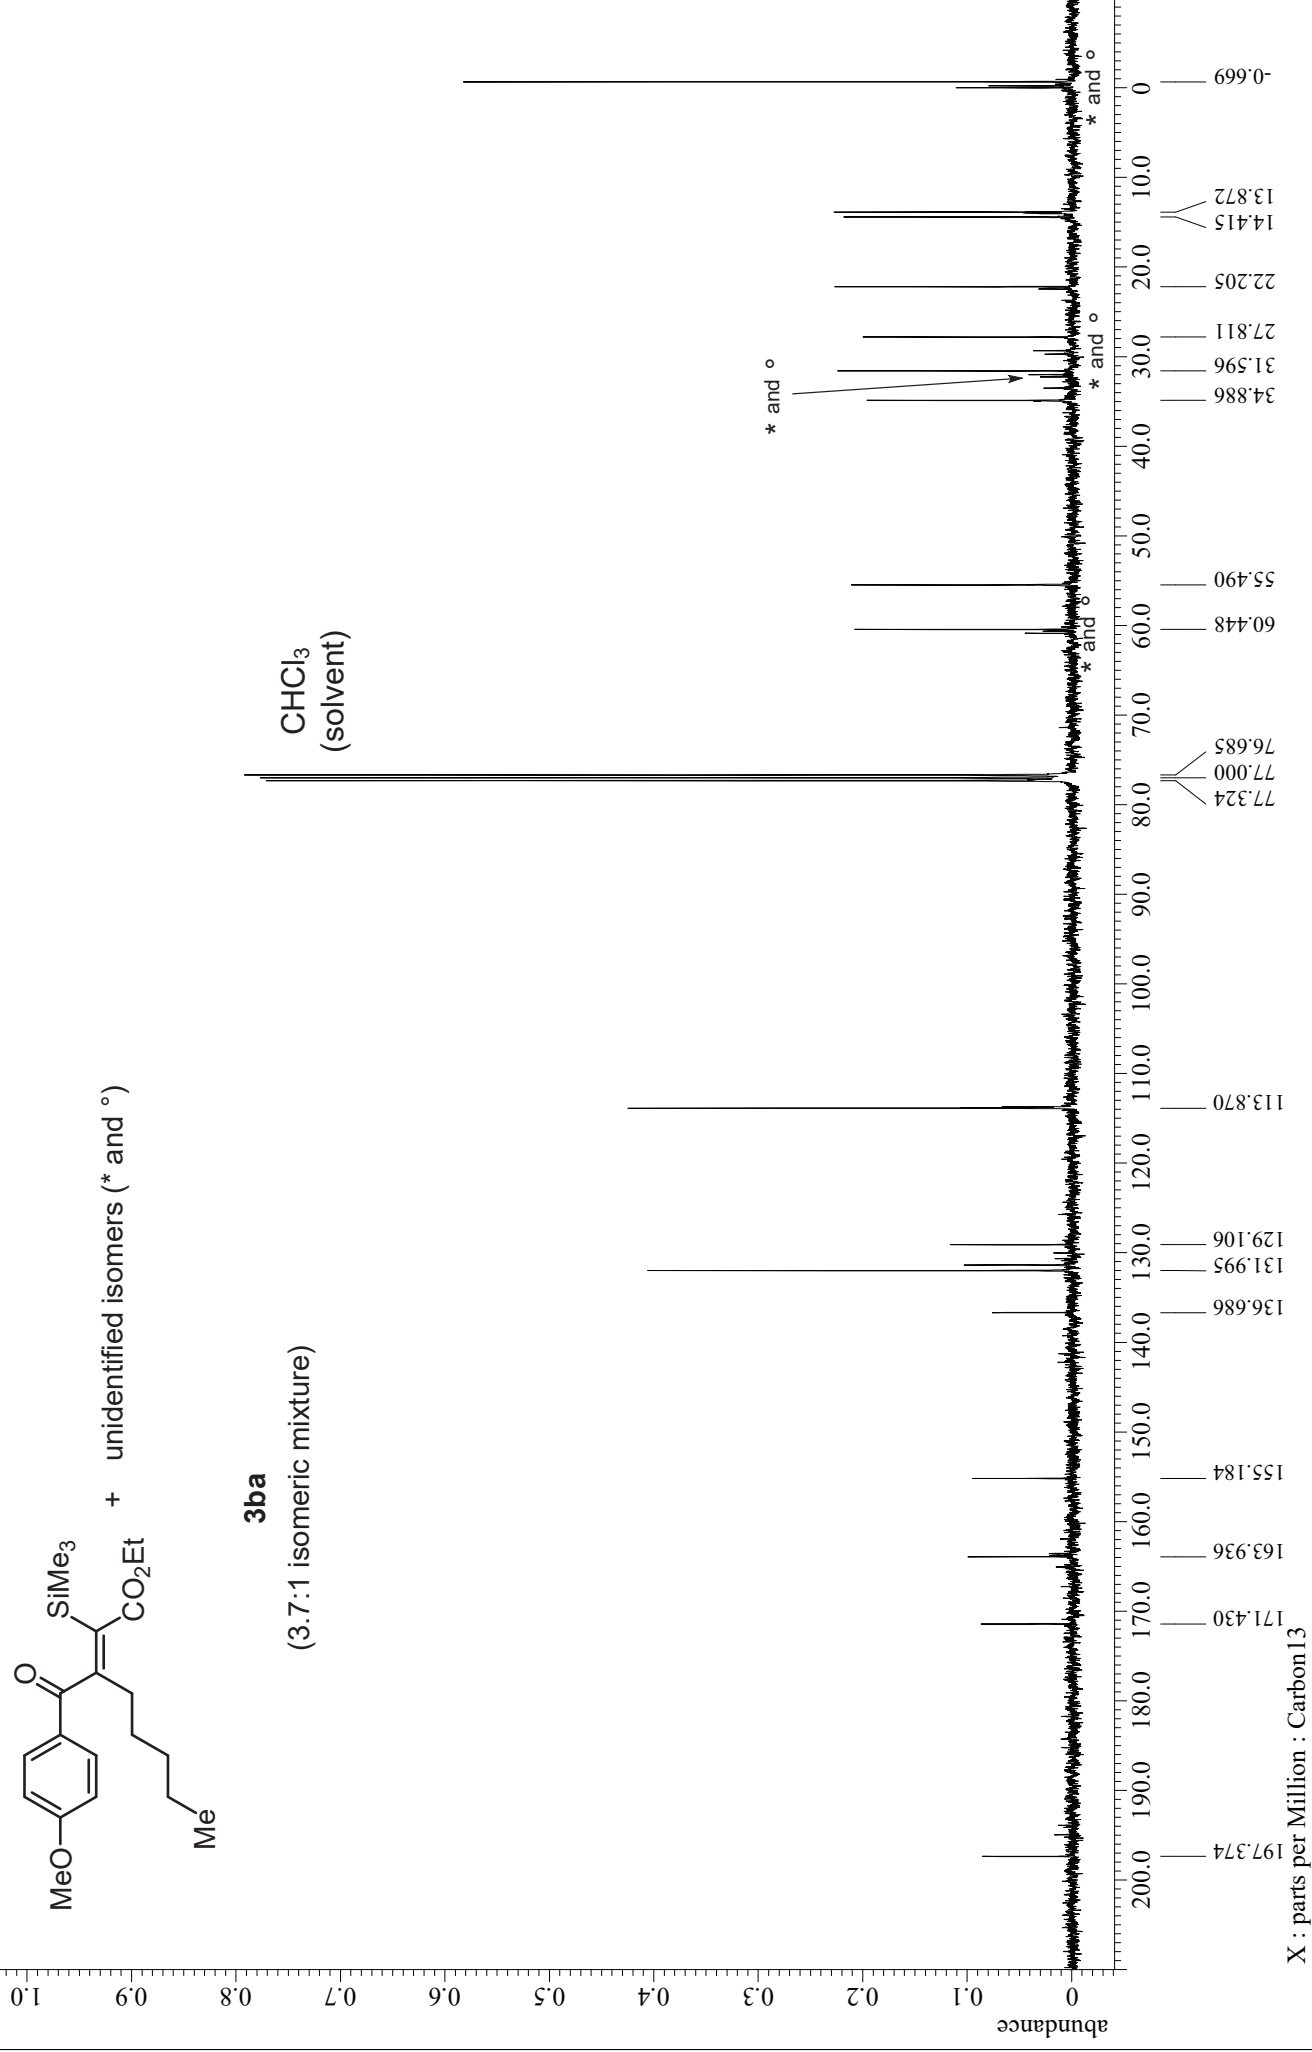

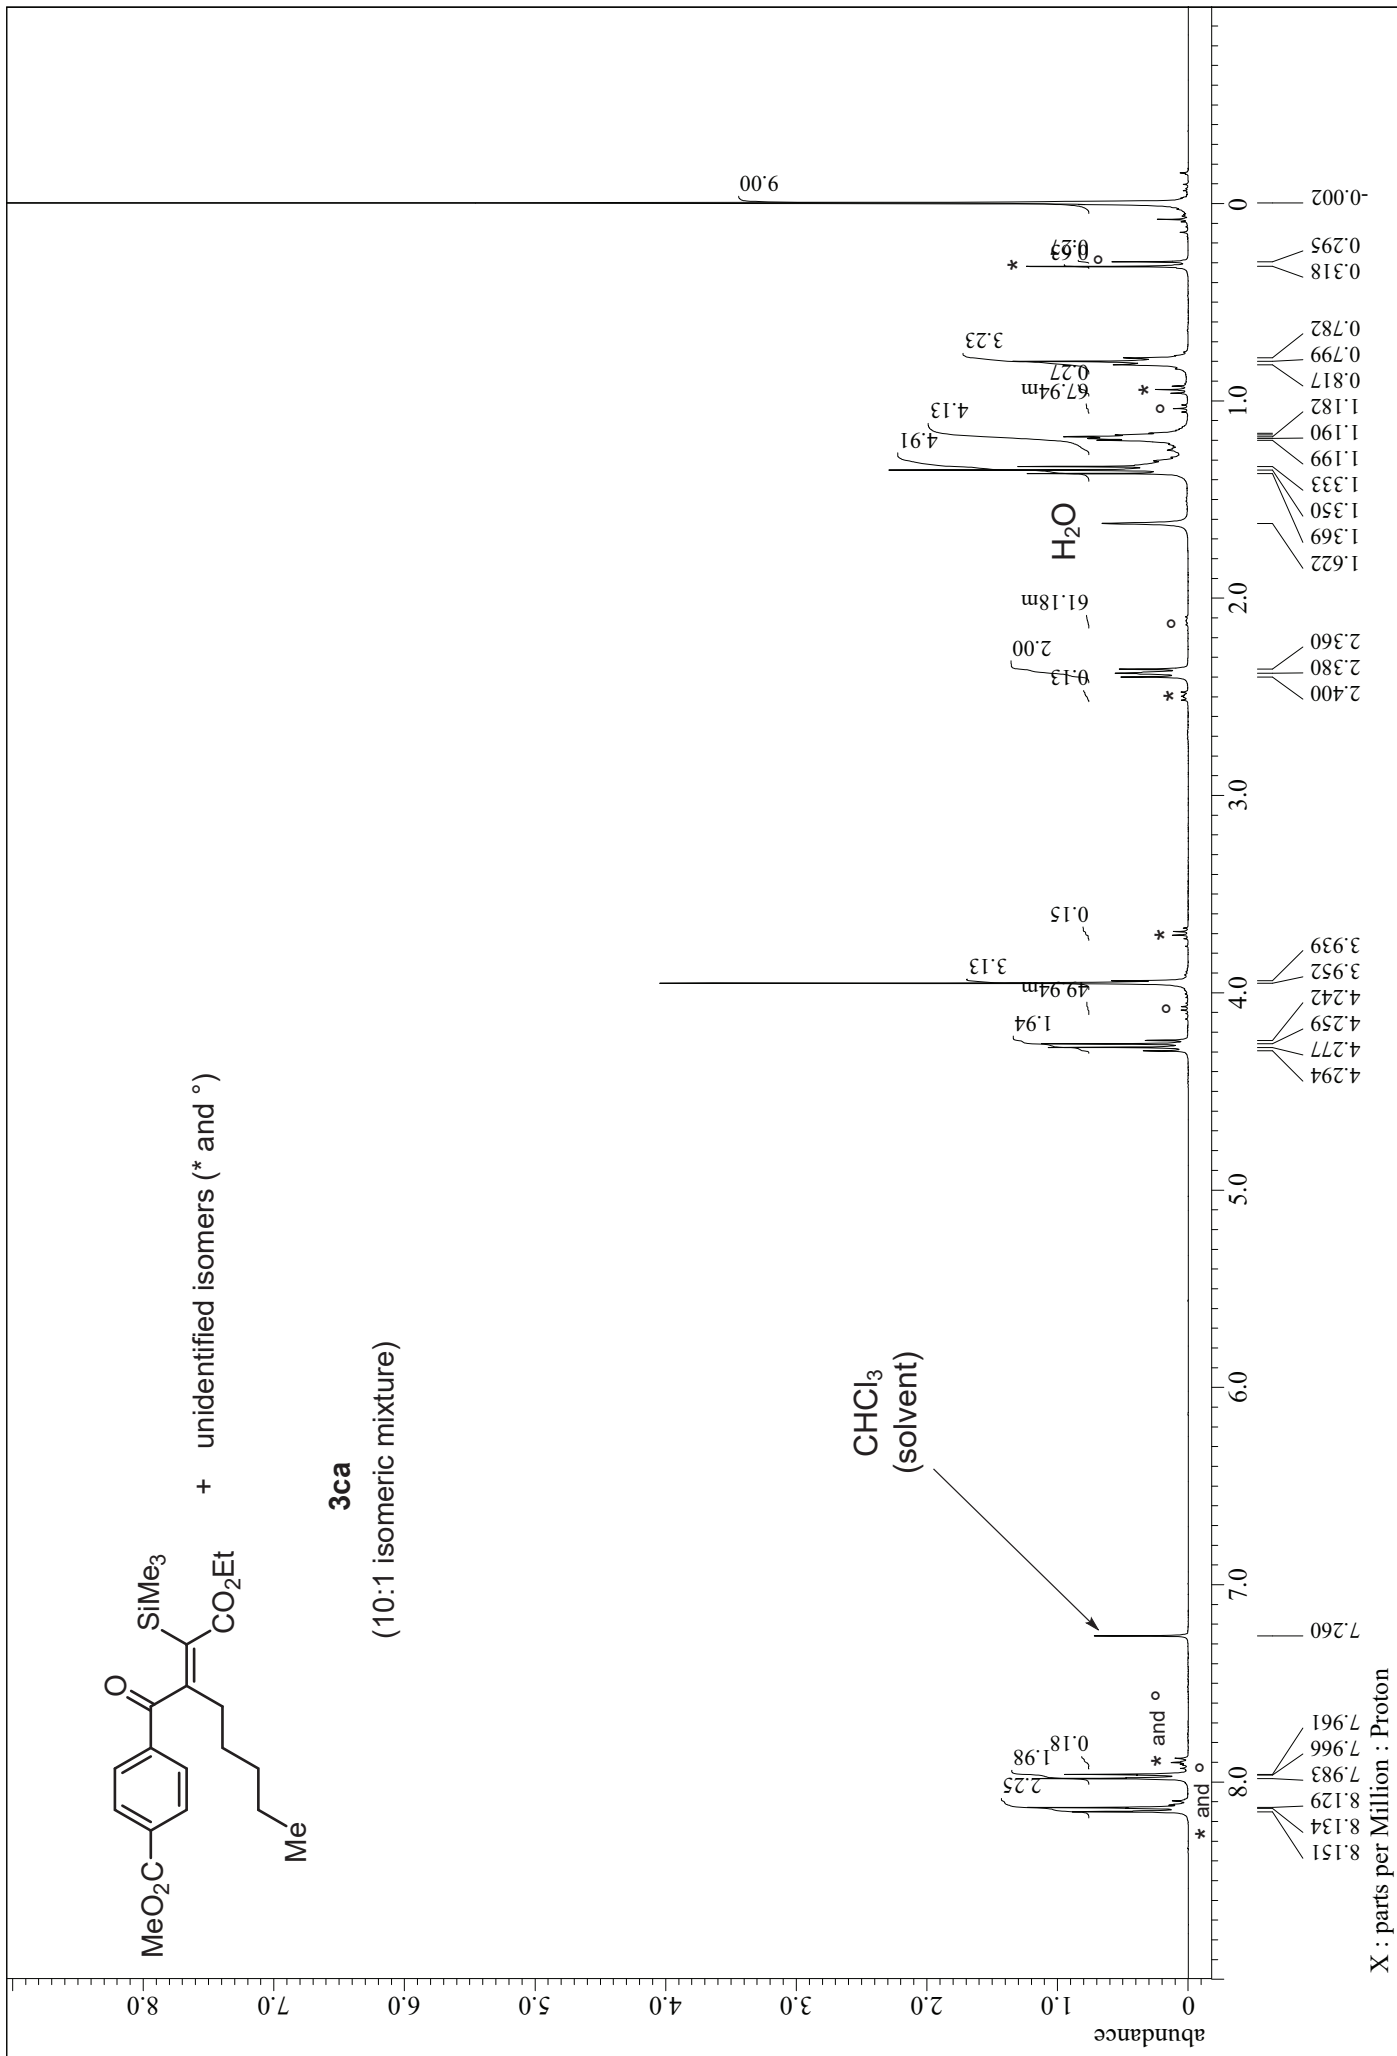

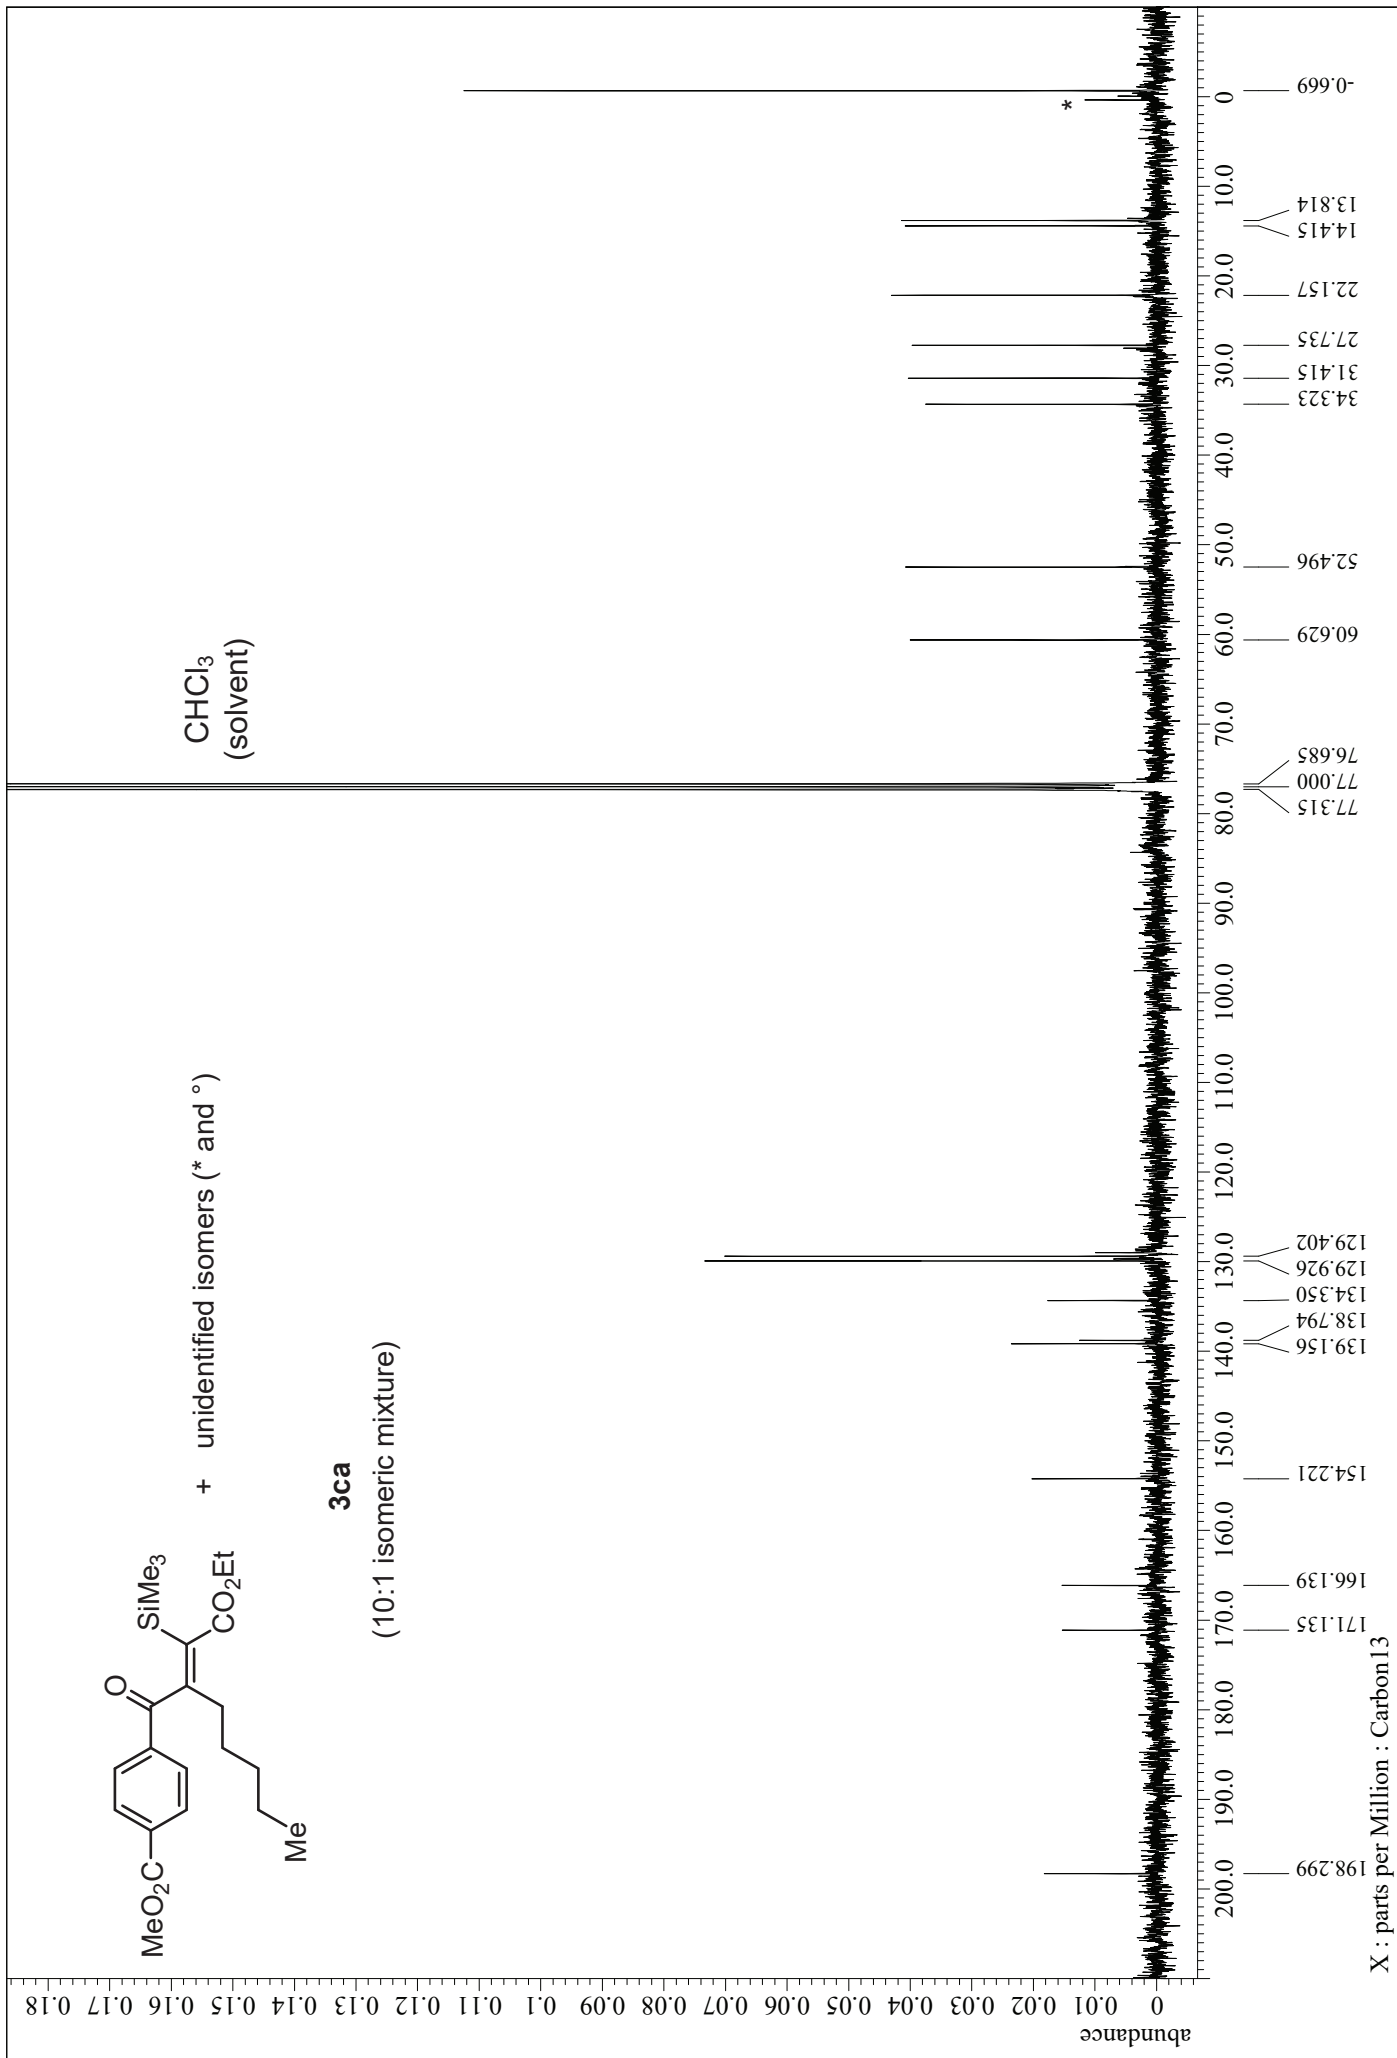



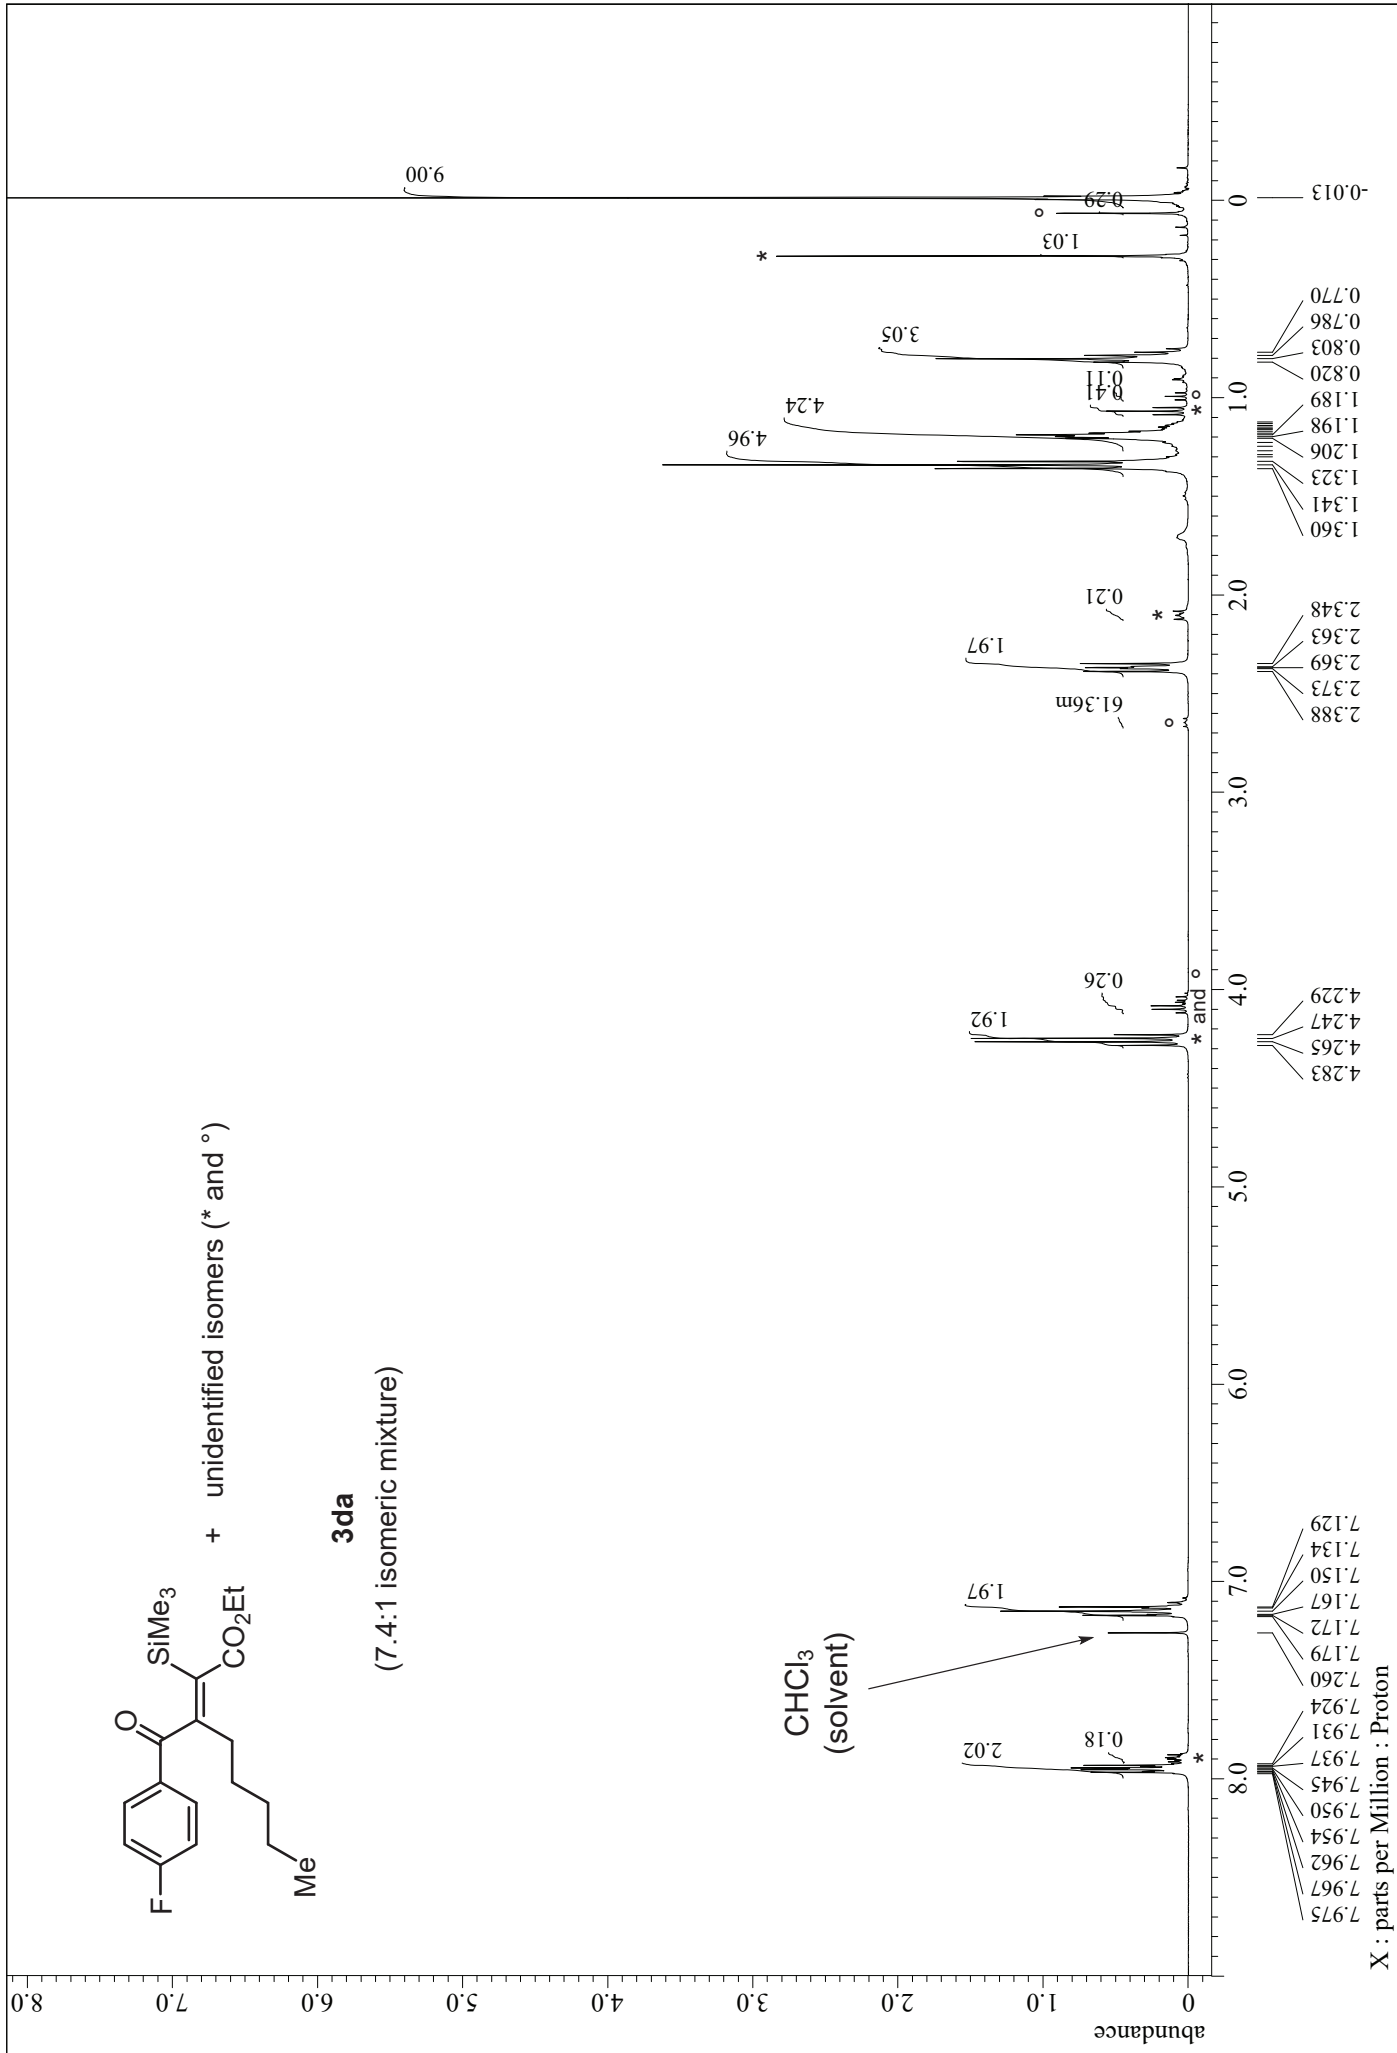

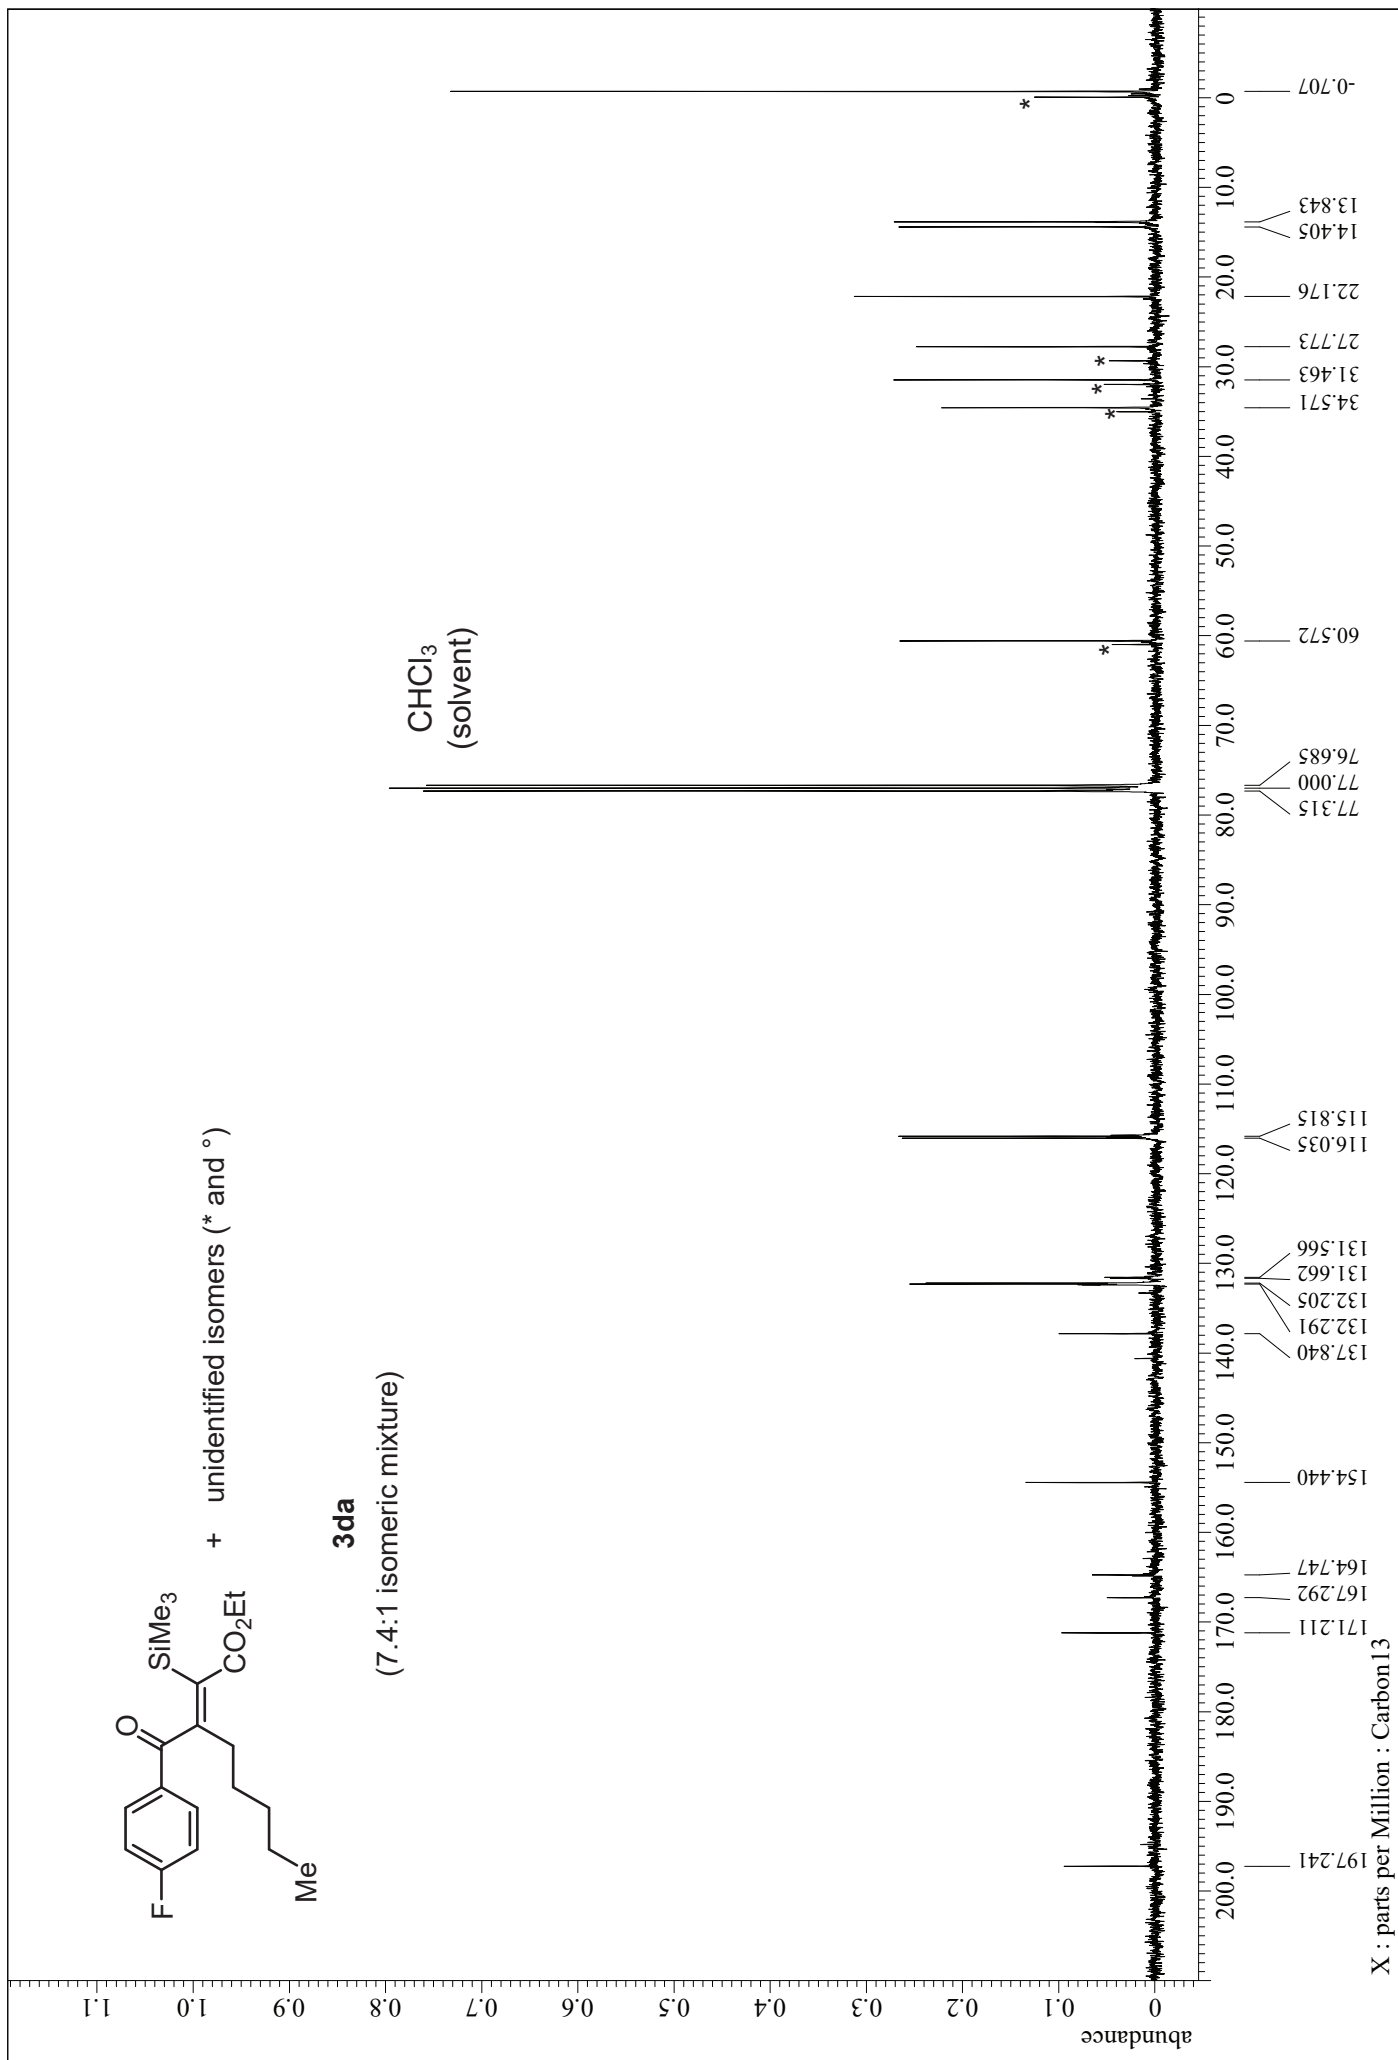

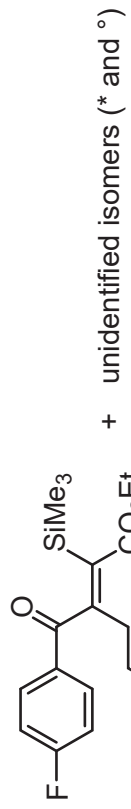

**3da**  
(7.4:1 isomeric mixture)

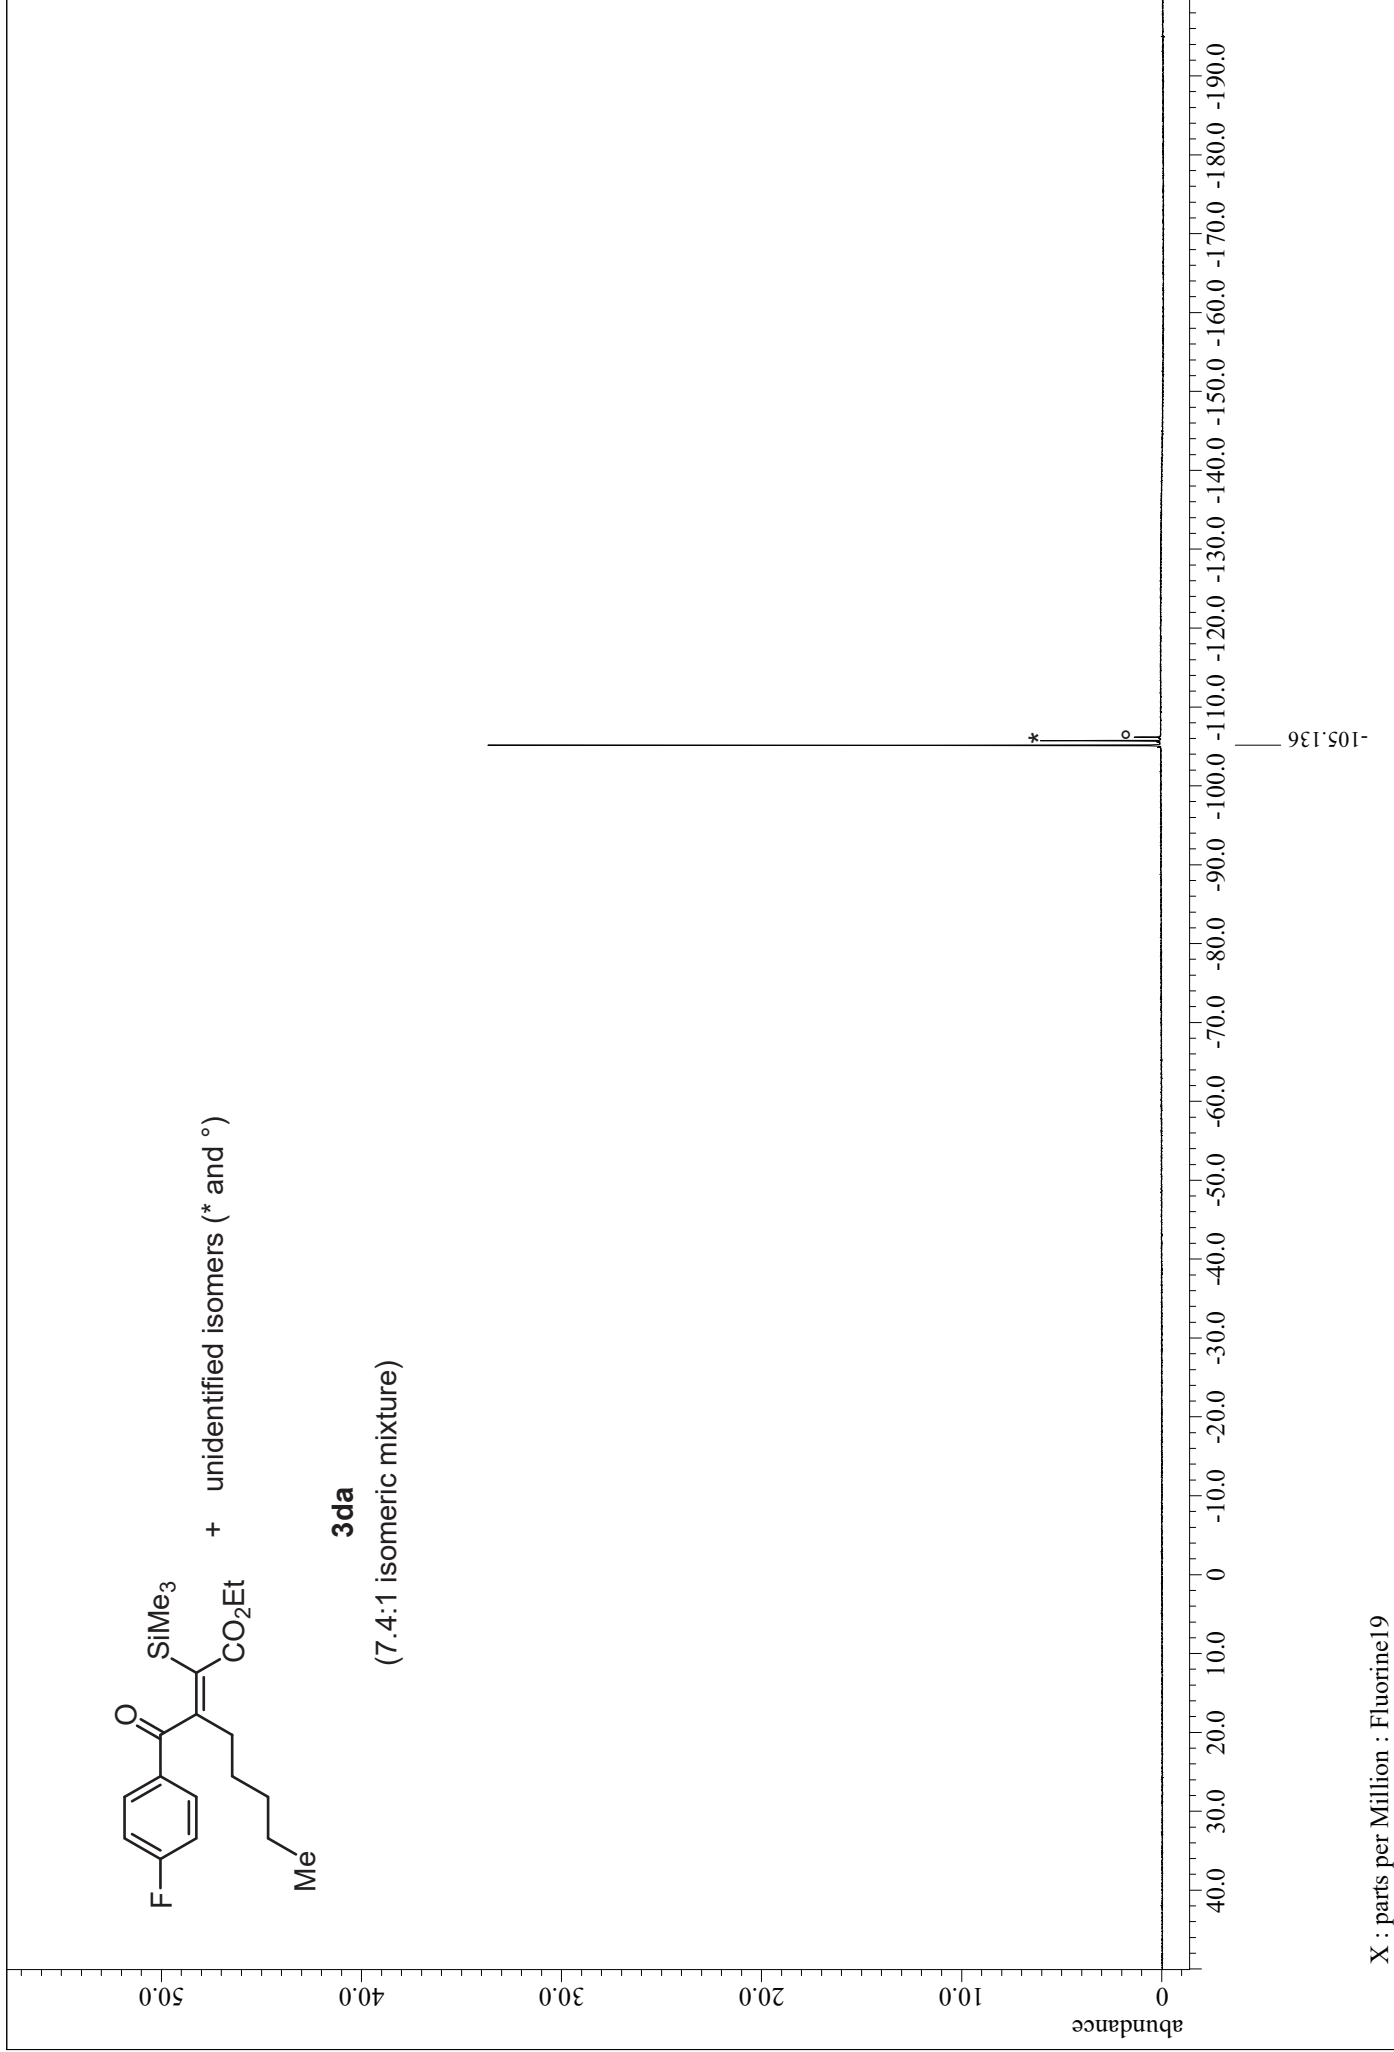

X : parts per Million : Fluorine19

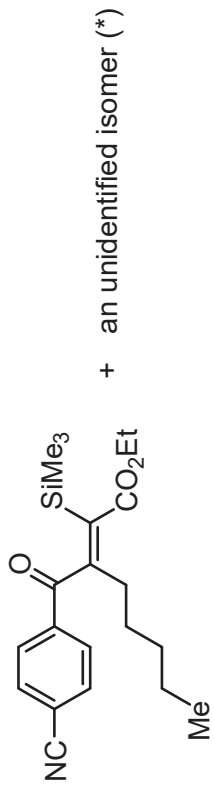

**3ea**  
(22:1 isomeric mixture)

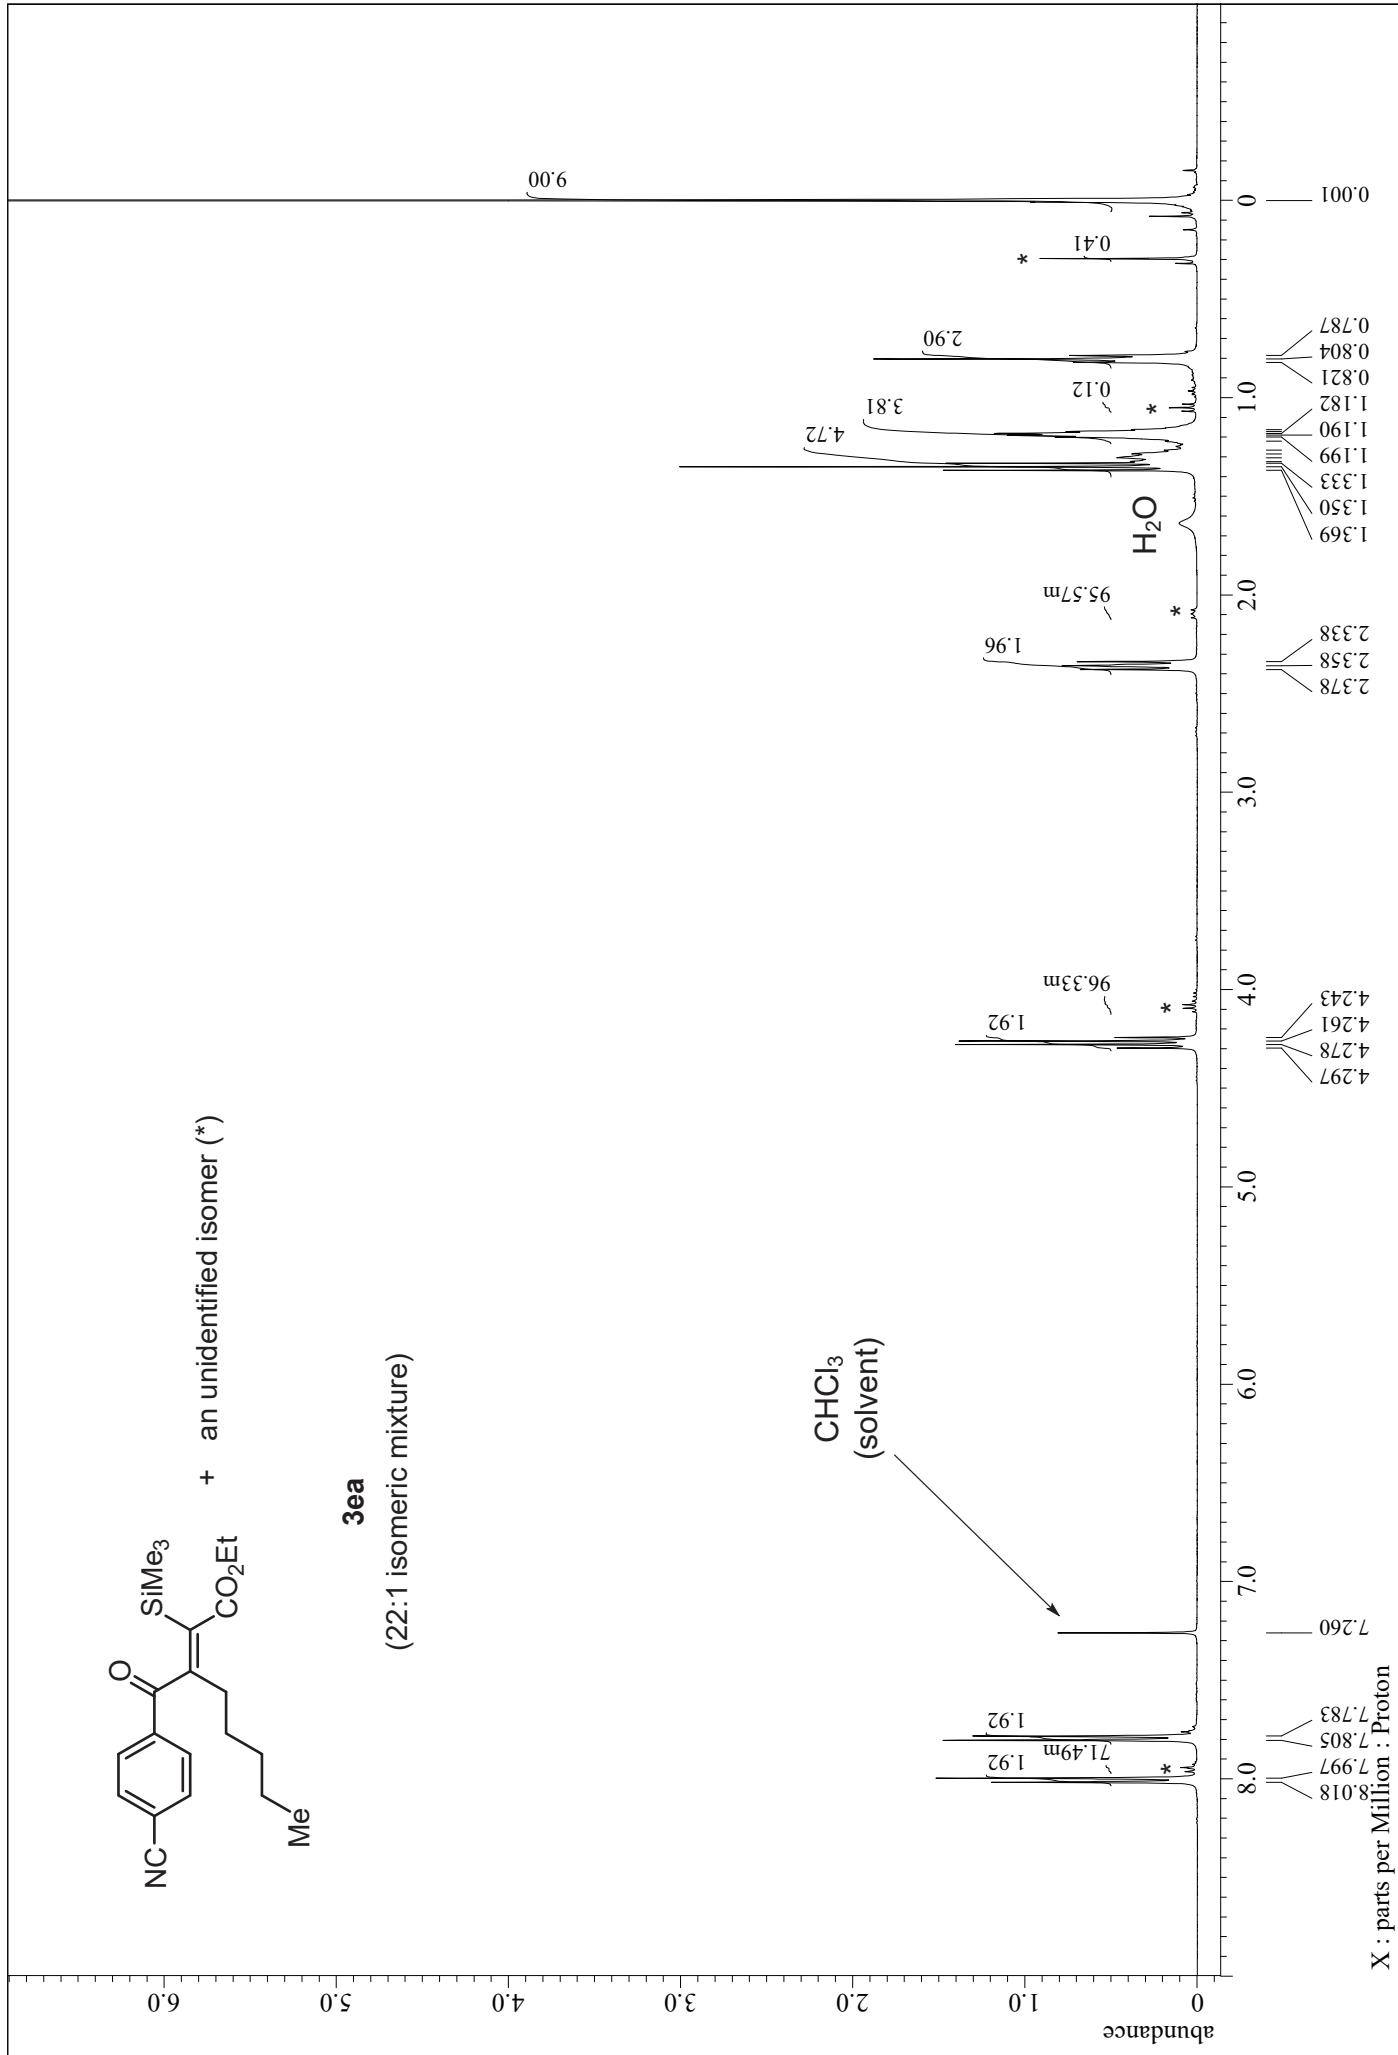

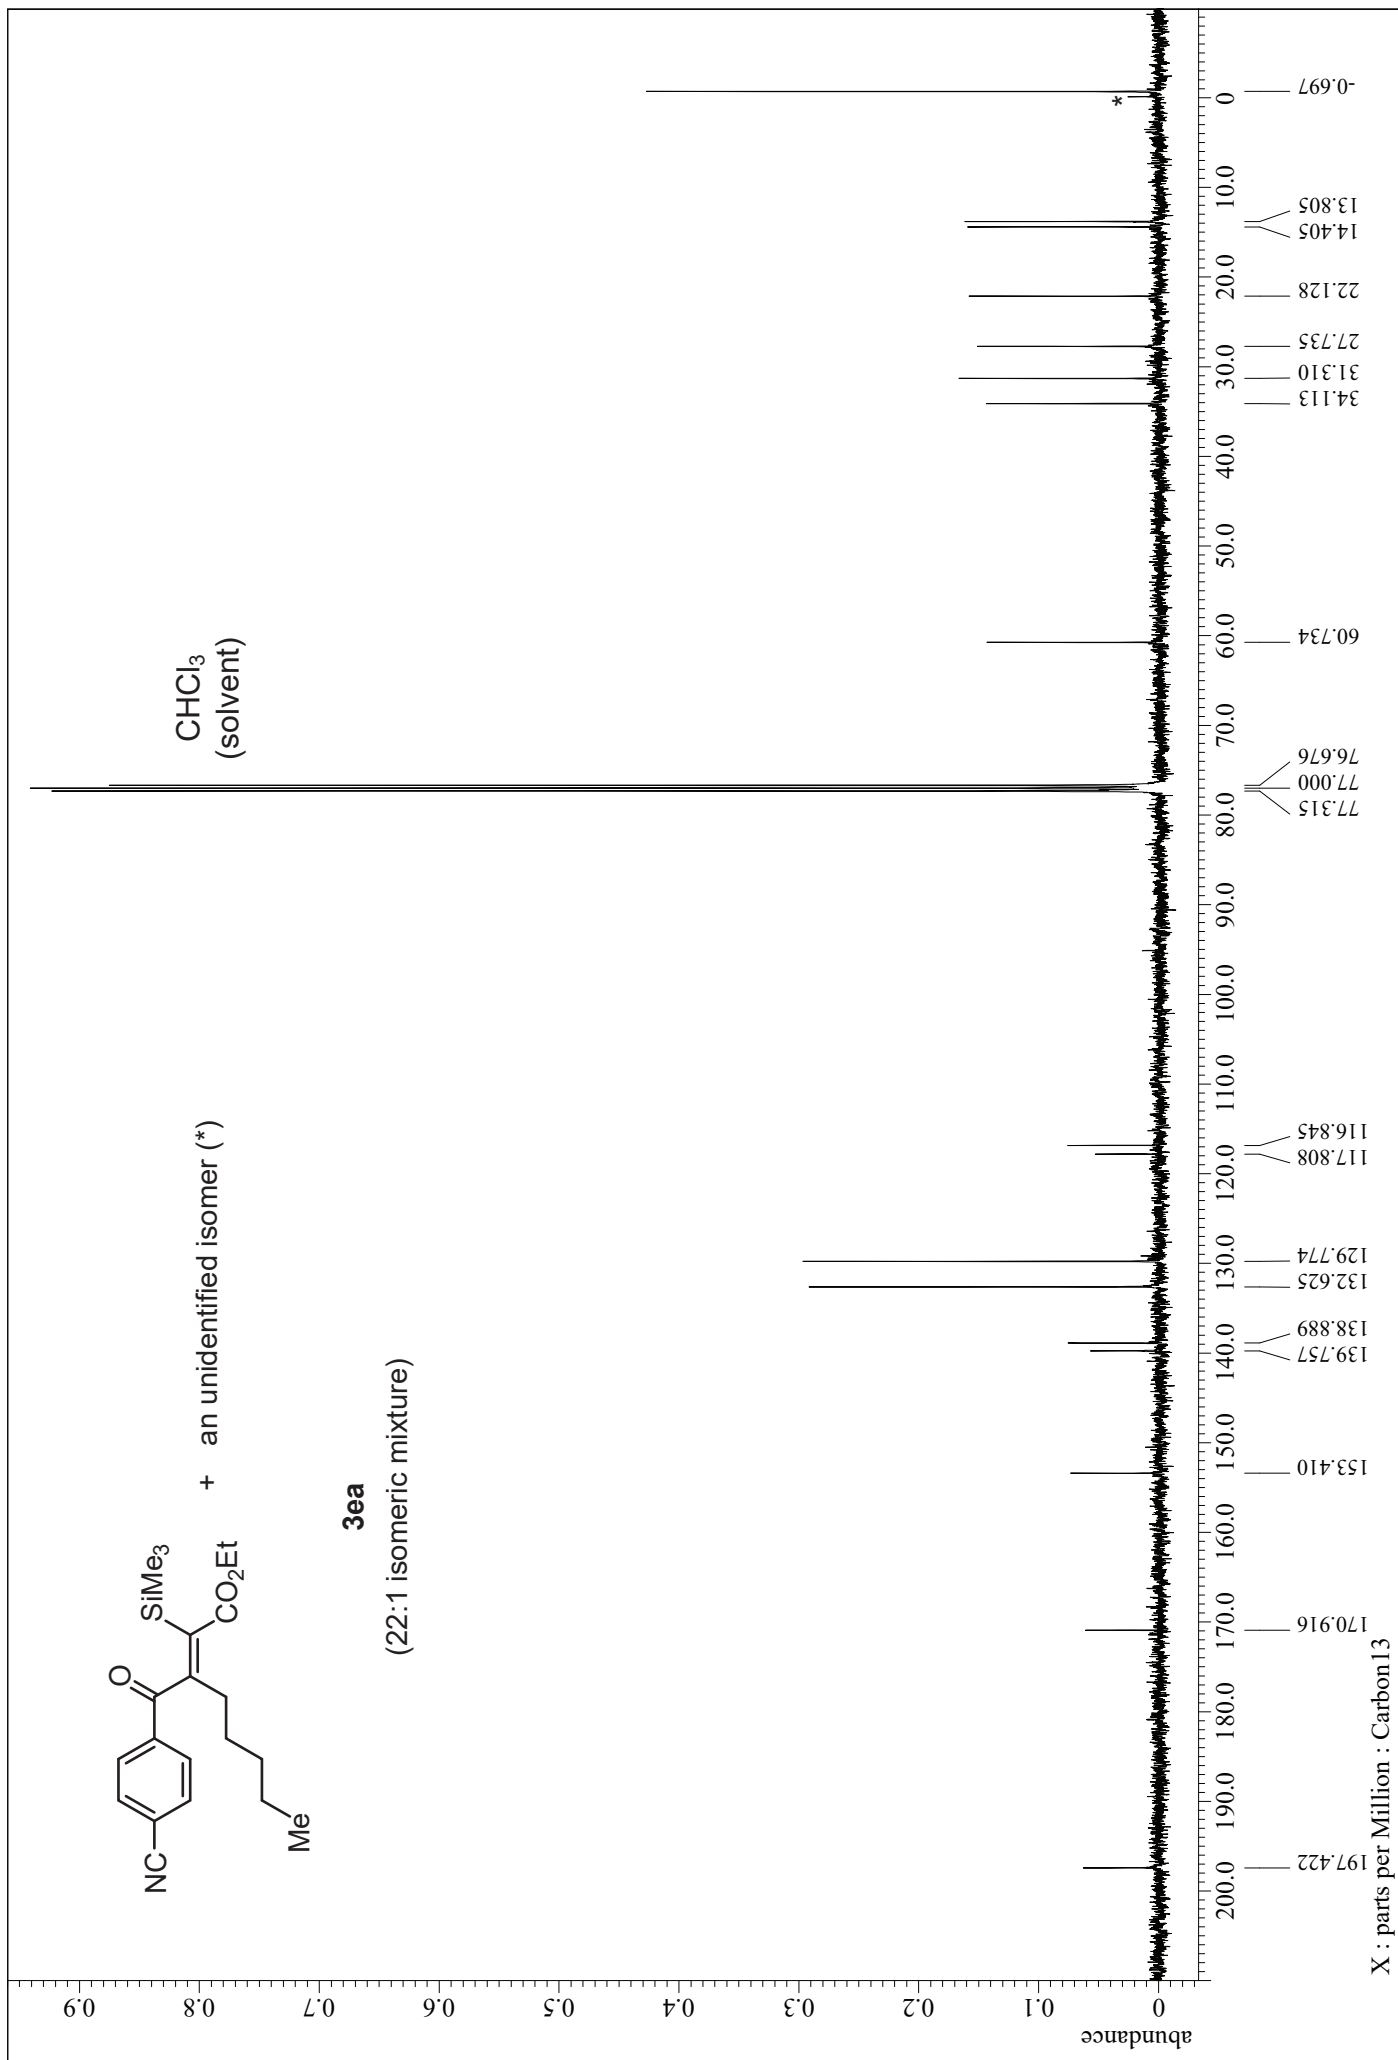

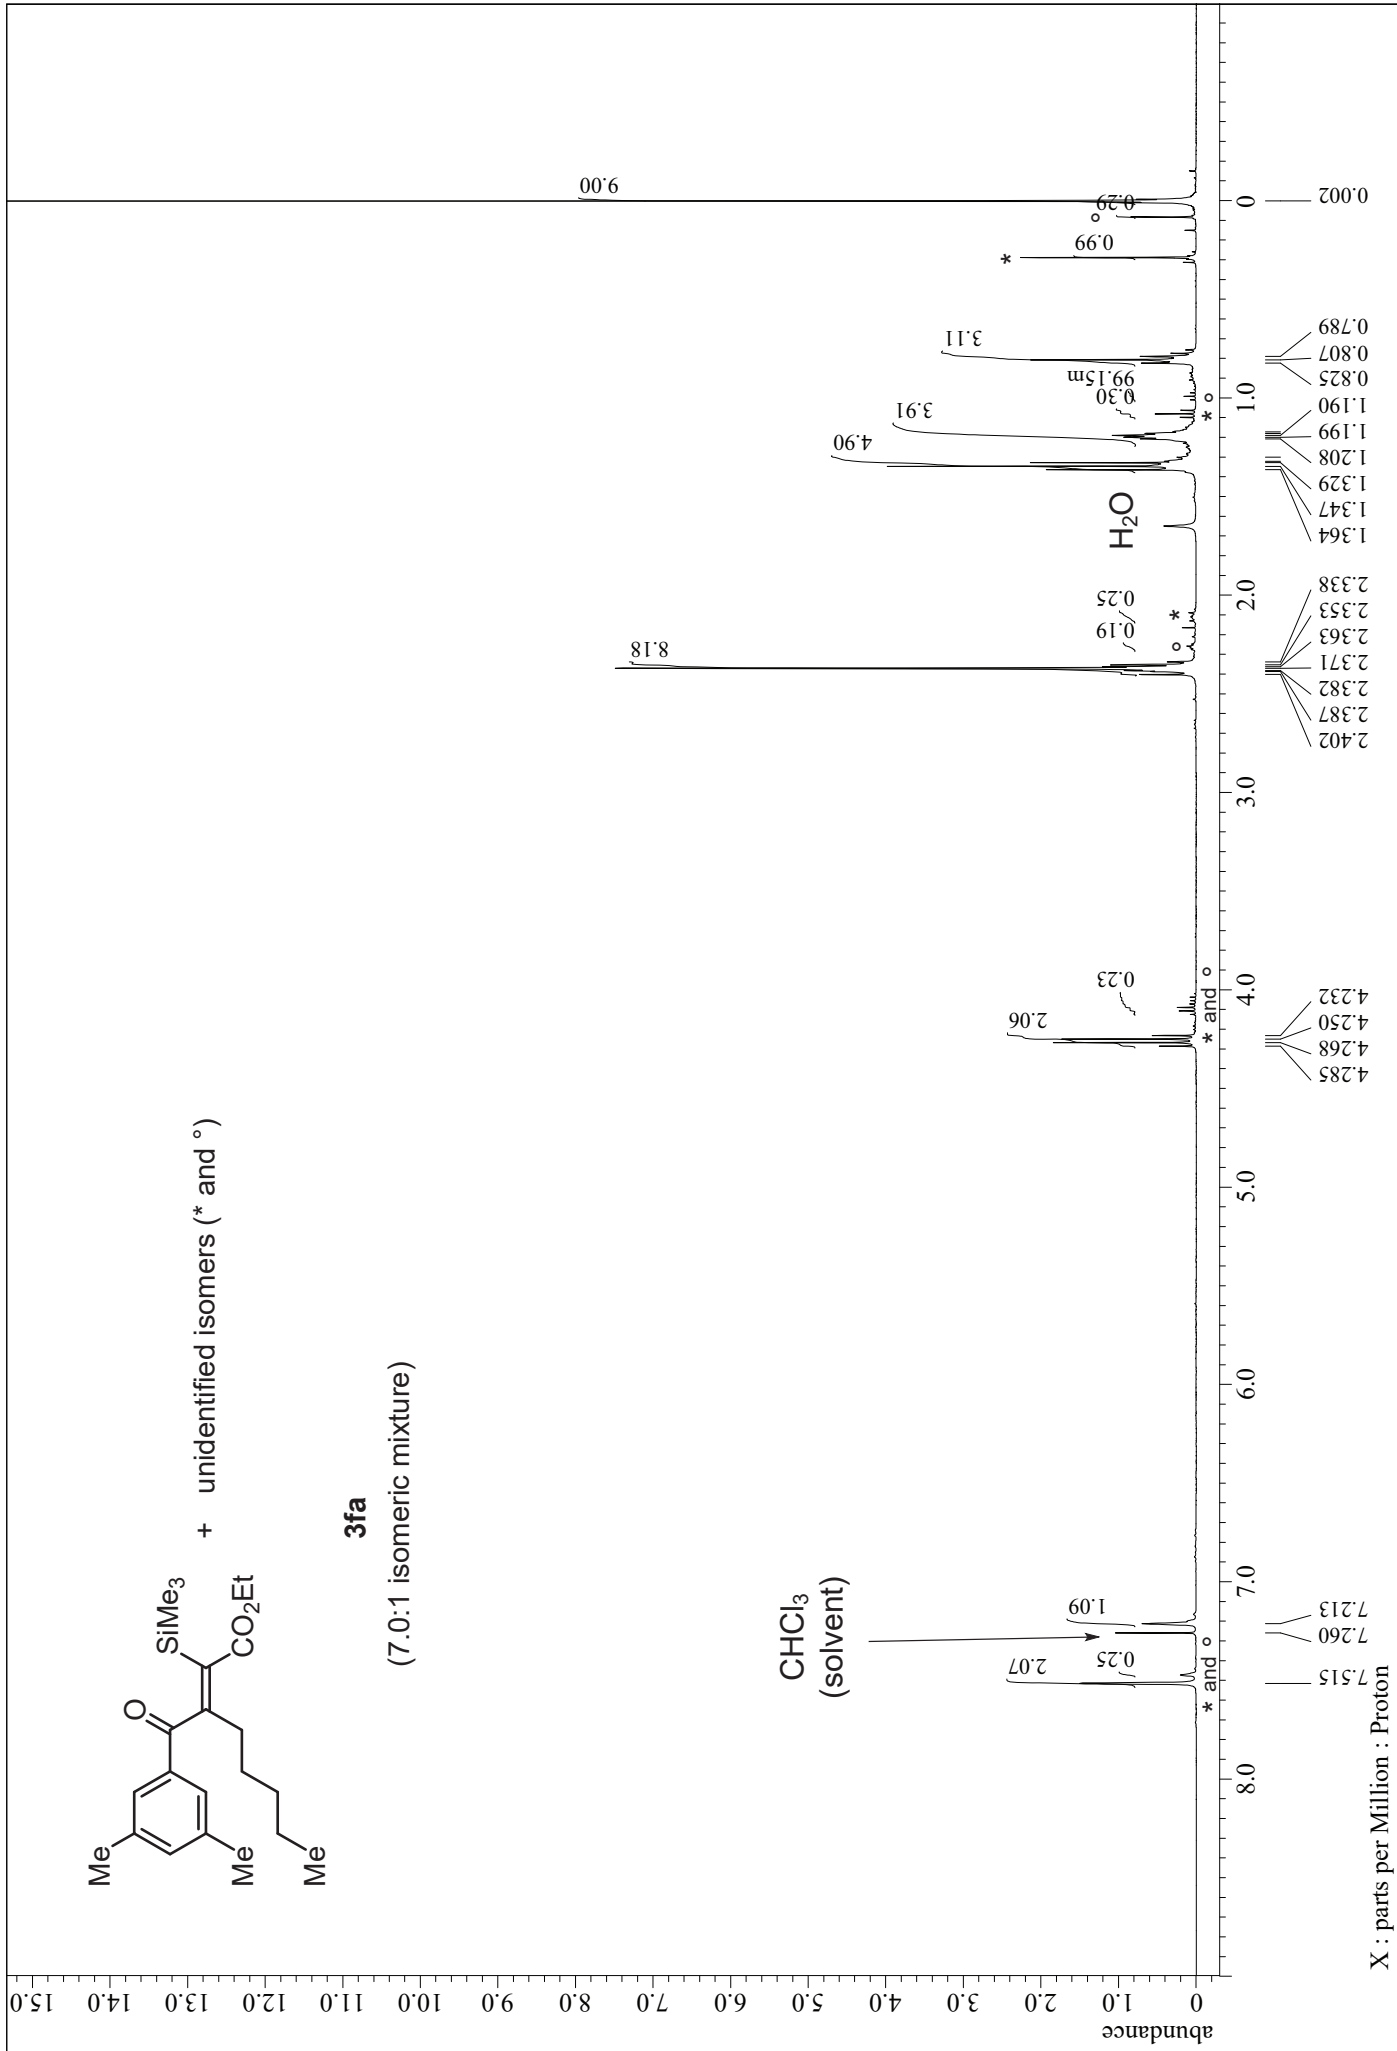

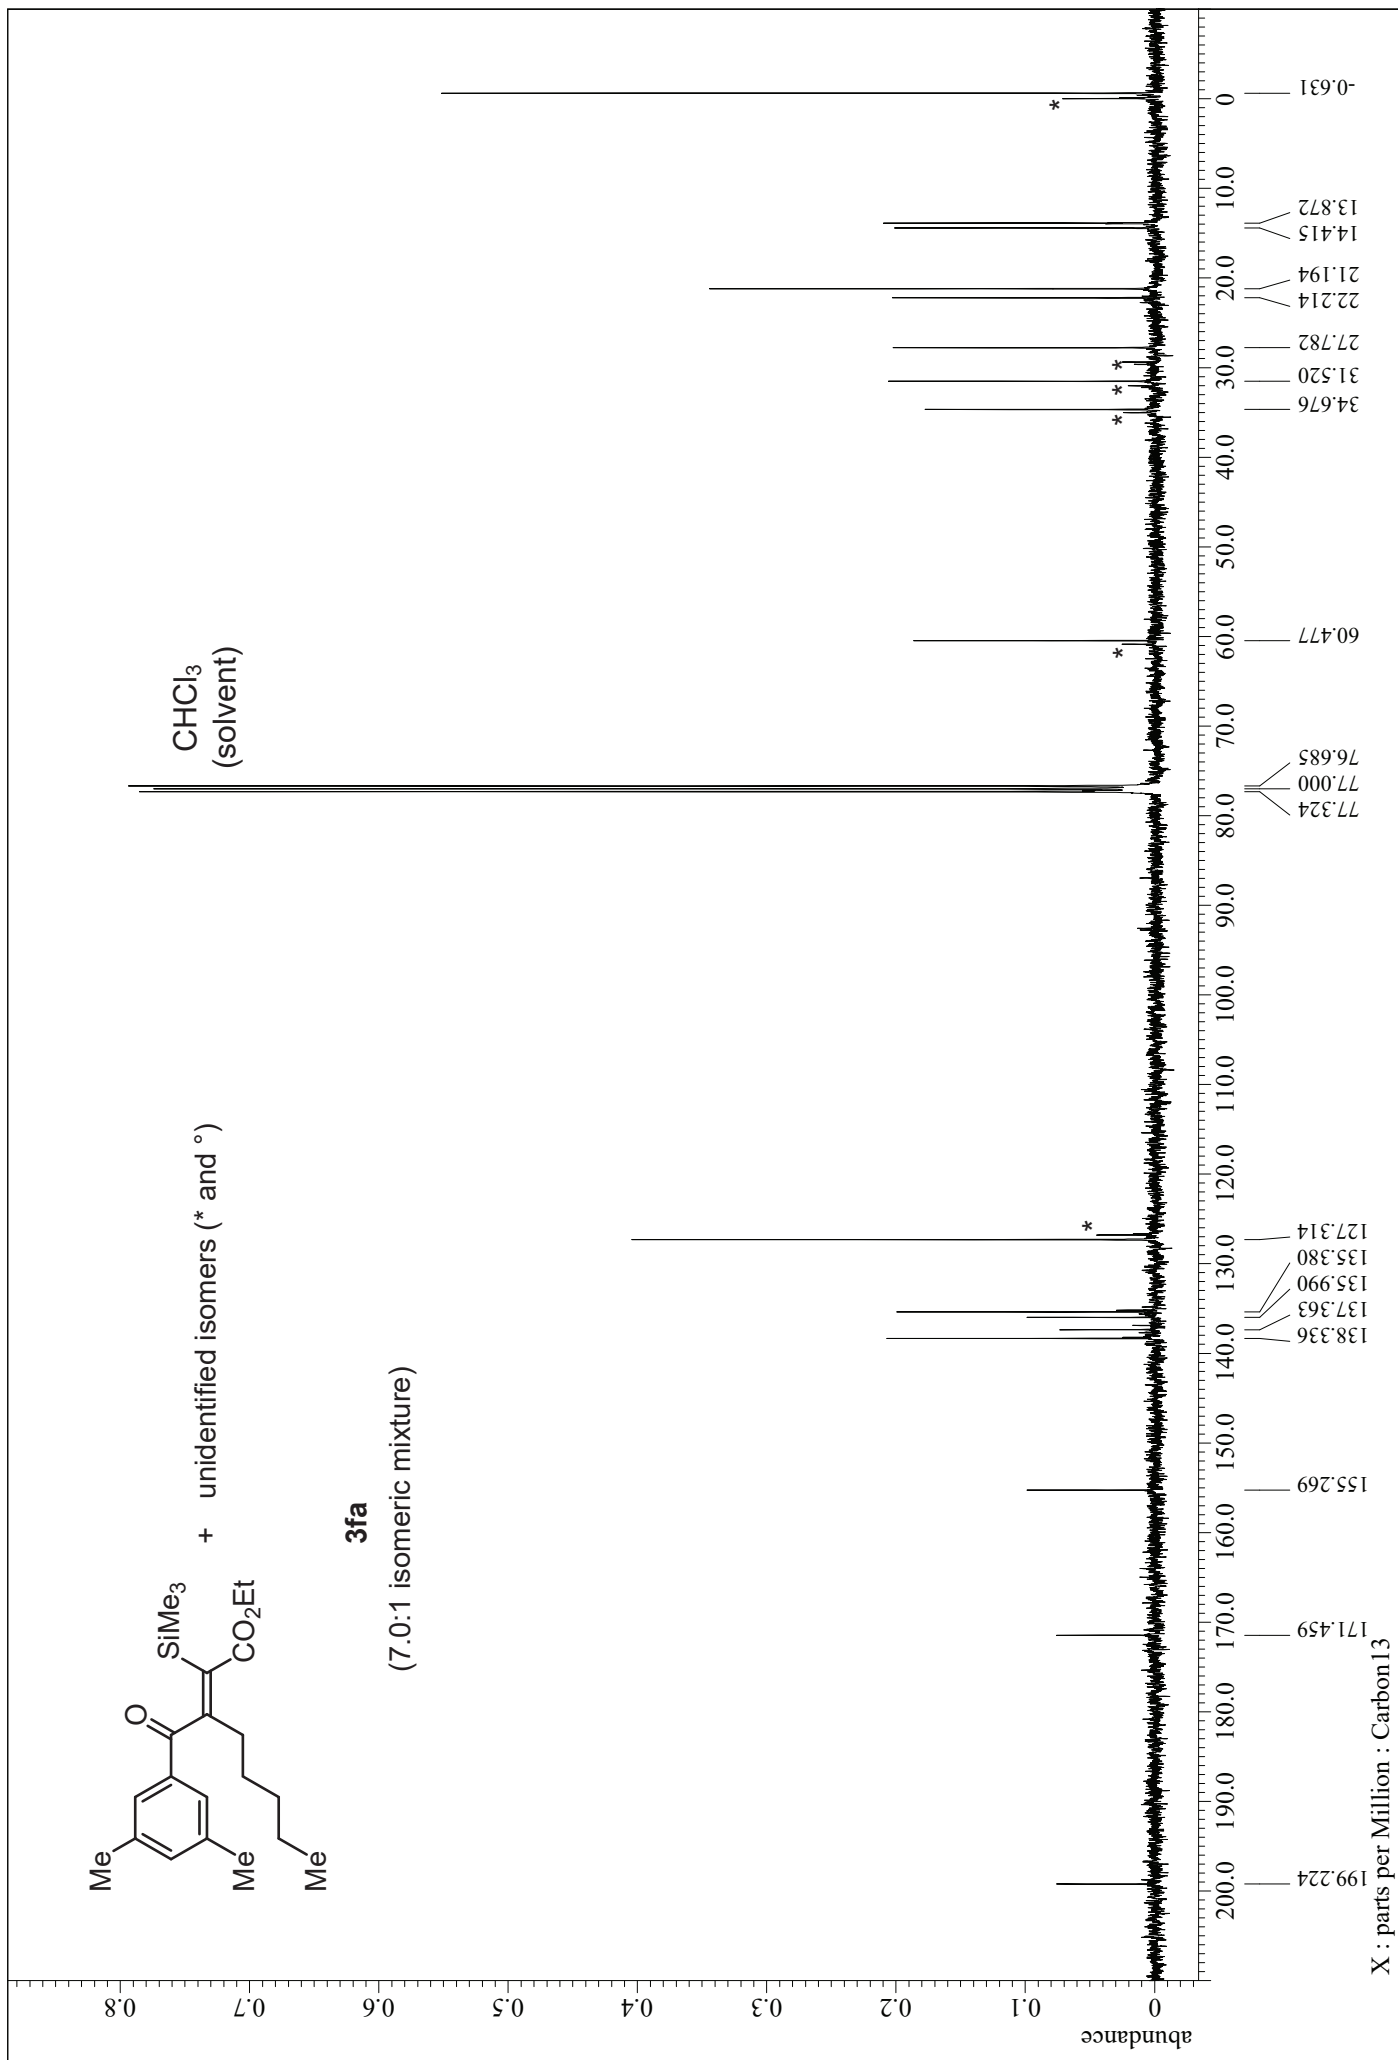

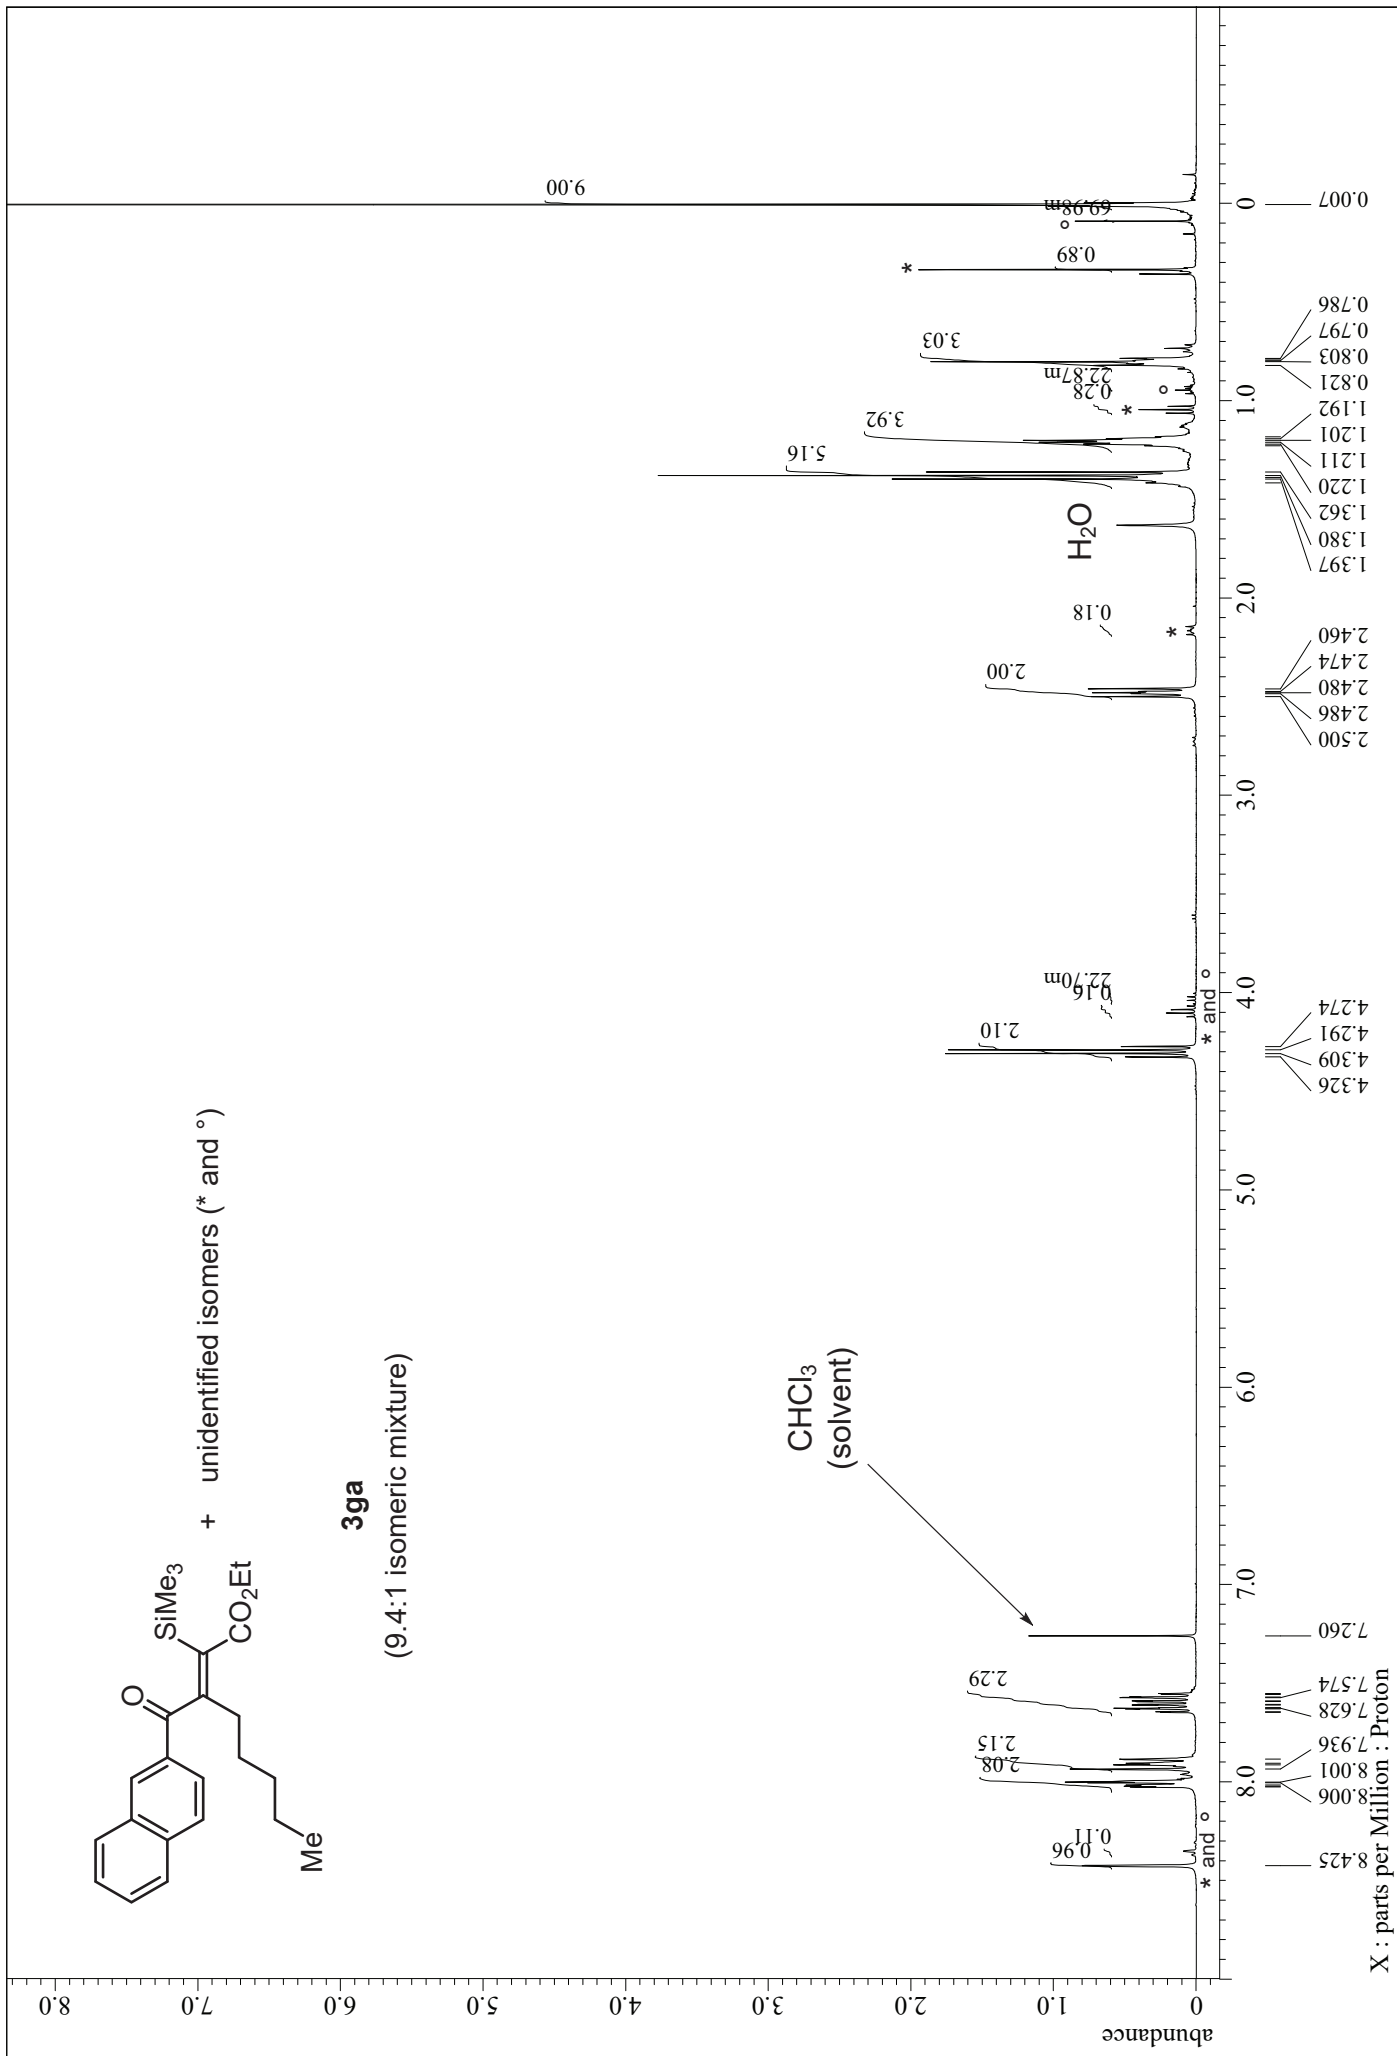



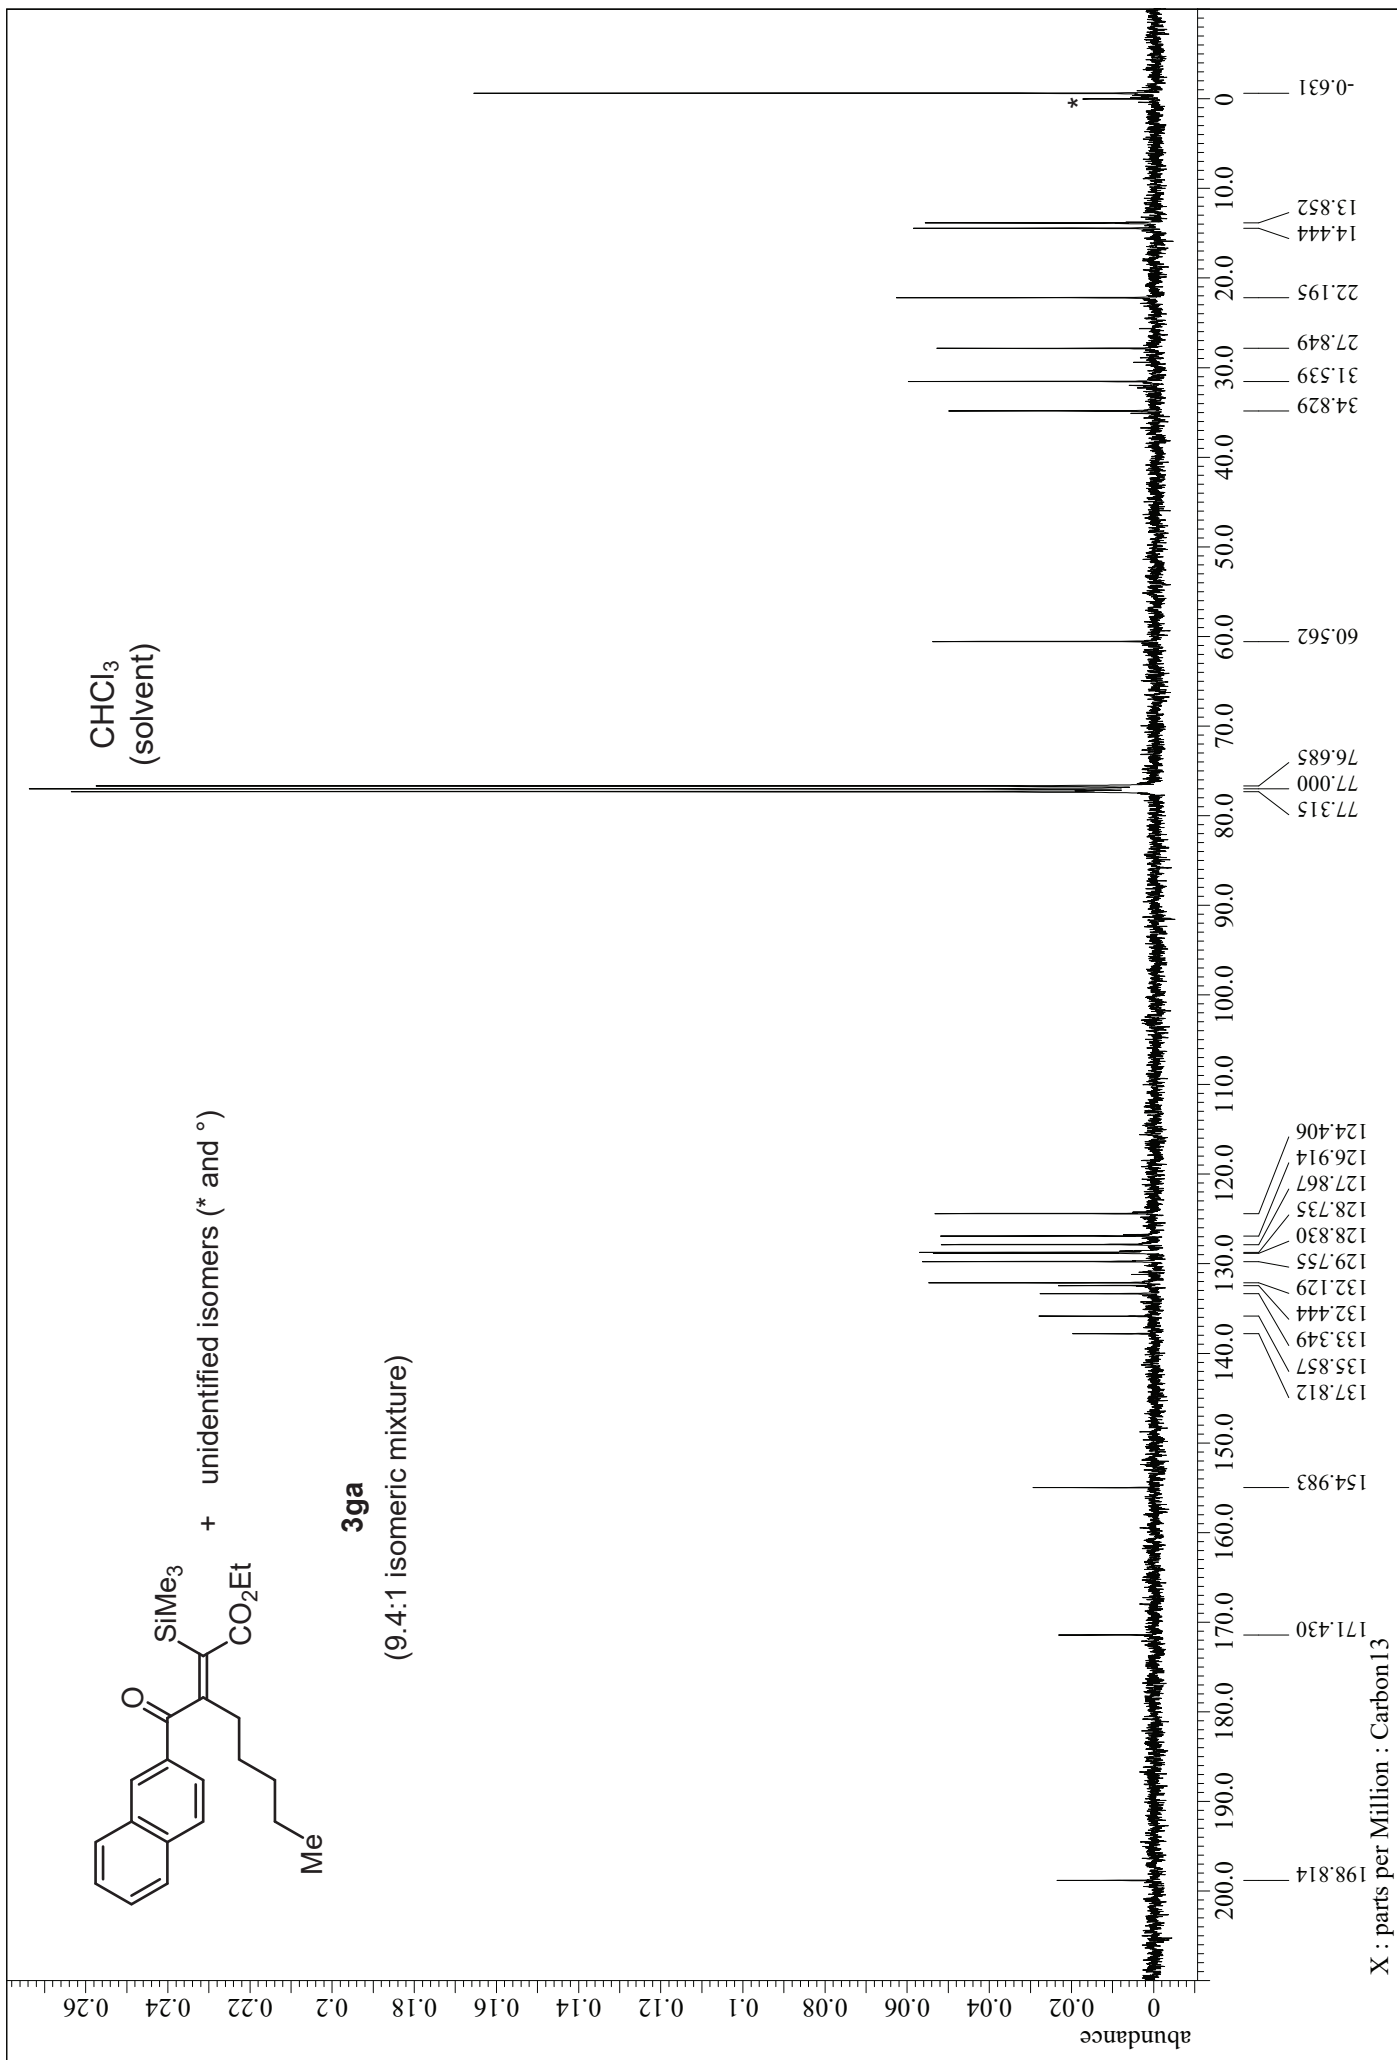

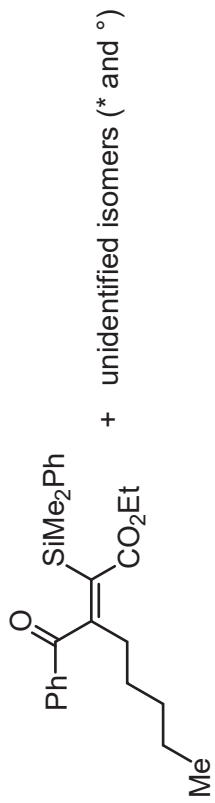

**3ha**

(5.7:1 isomeric mixture)

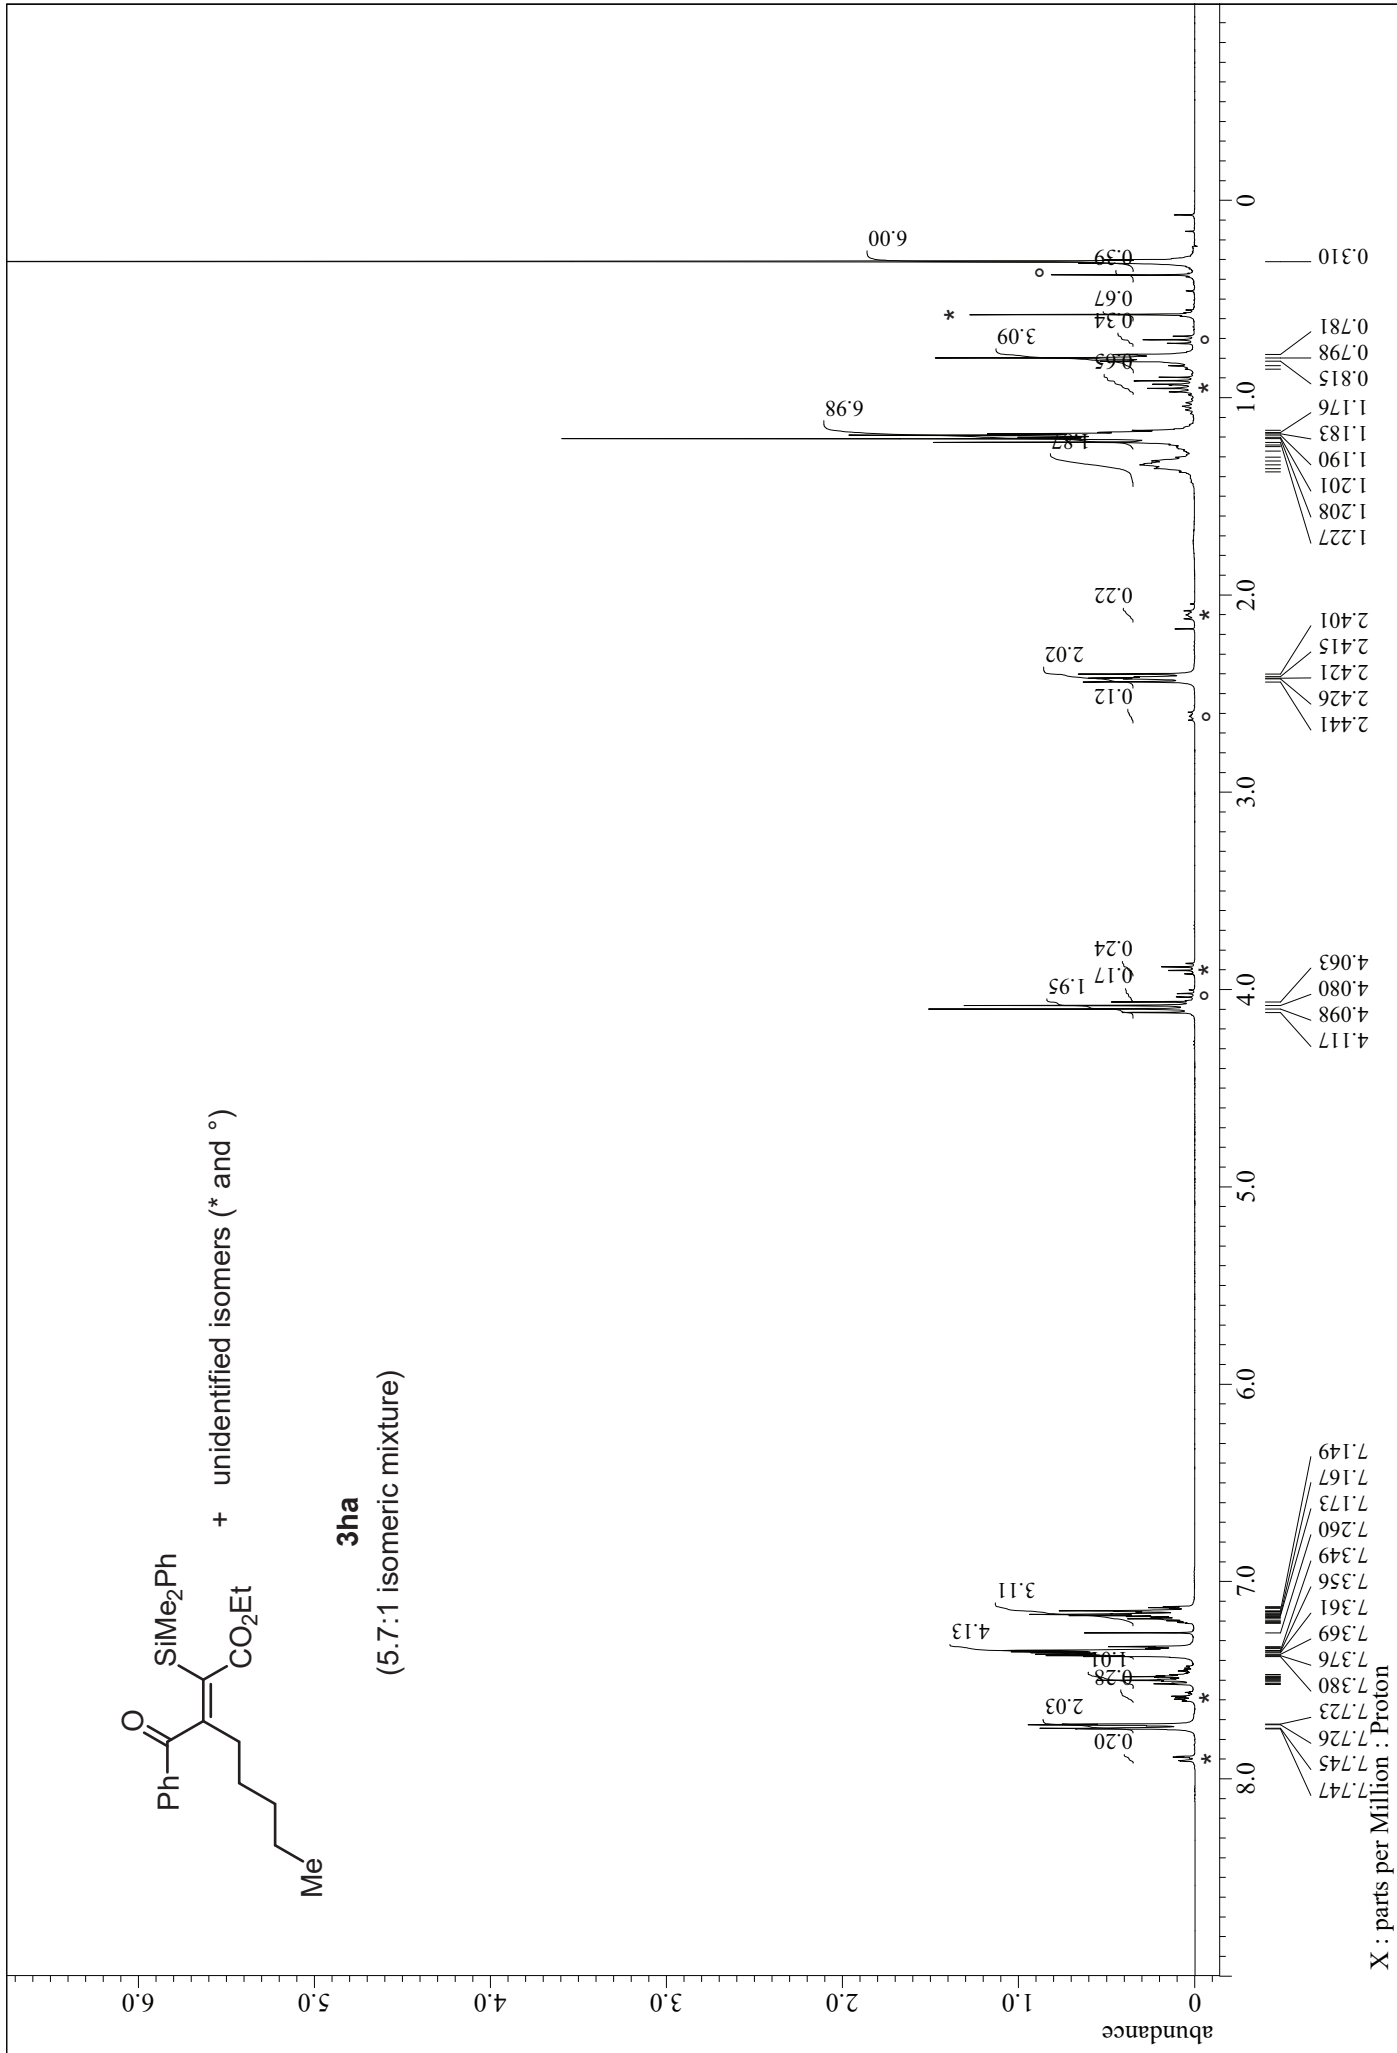

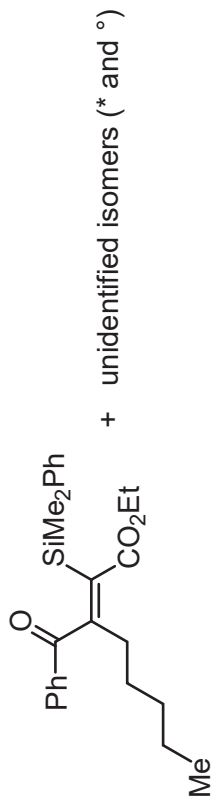

**3ha**  
(5.7:1 isomeric mixture)

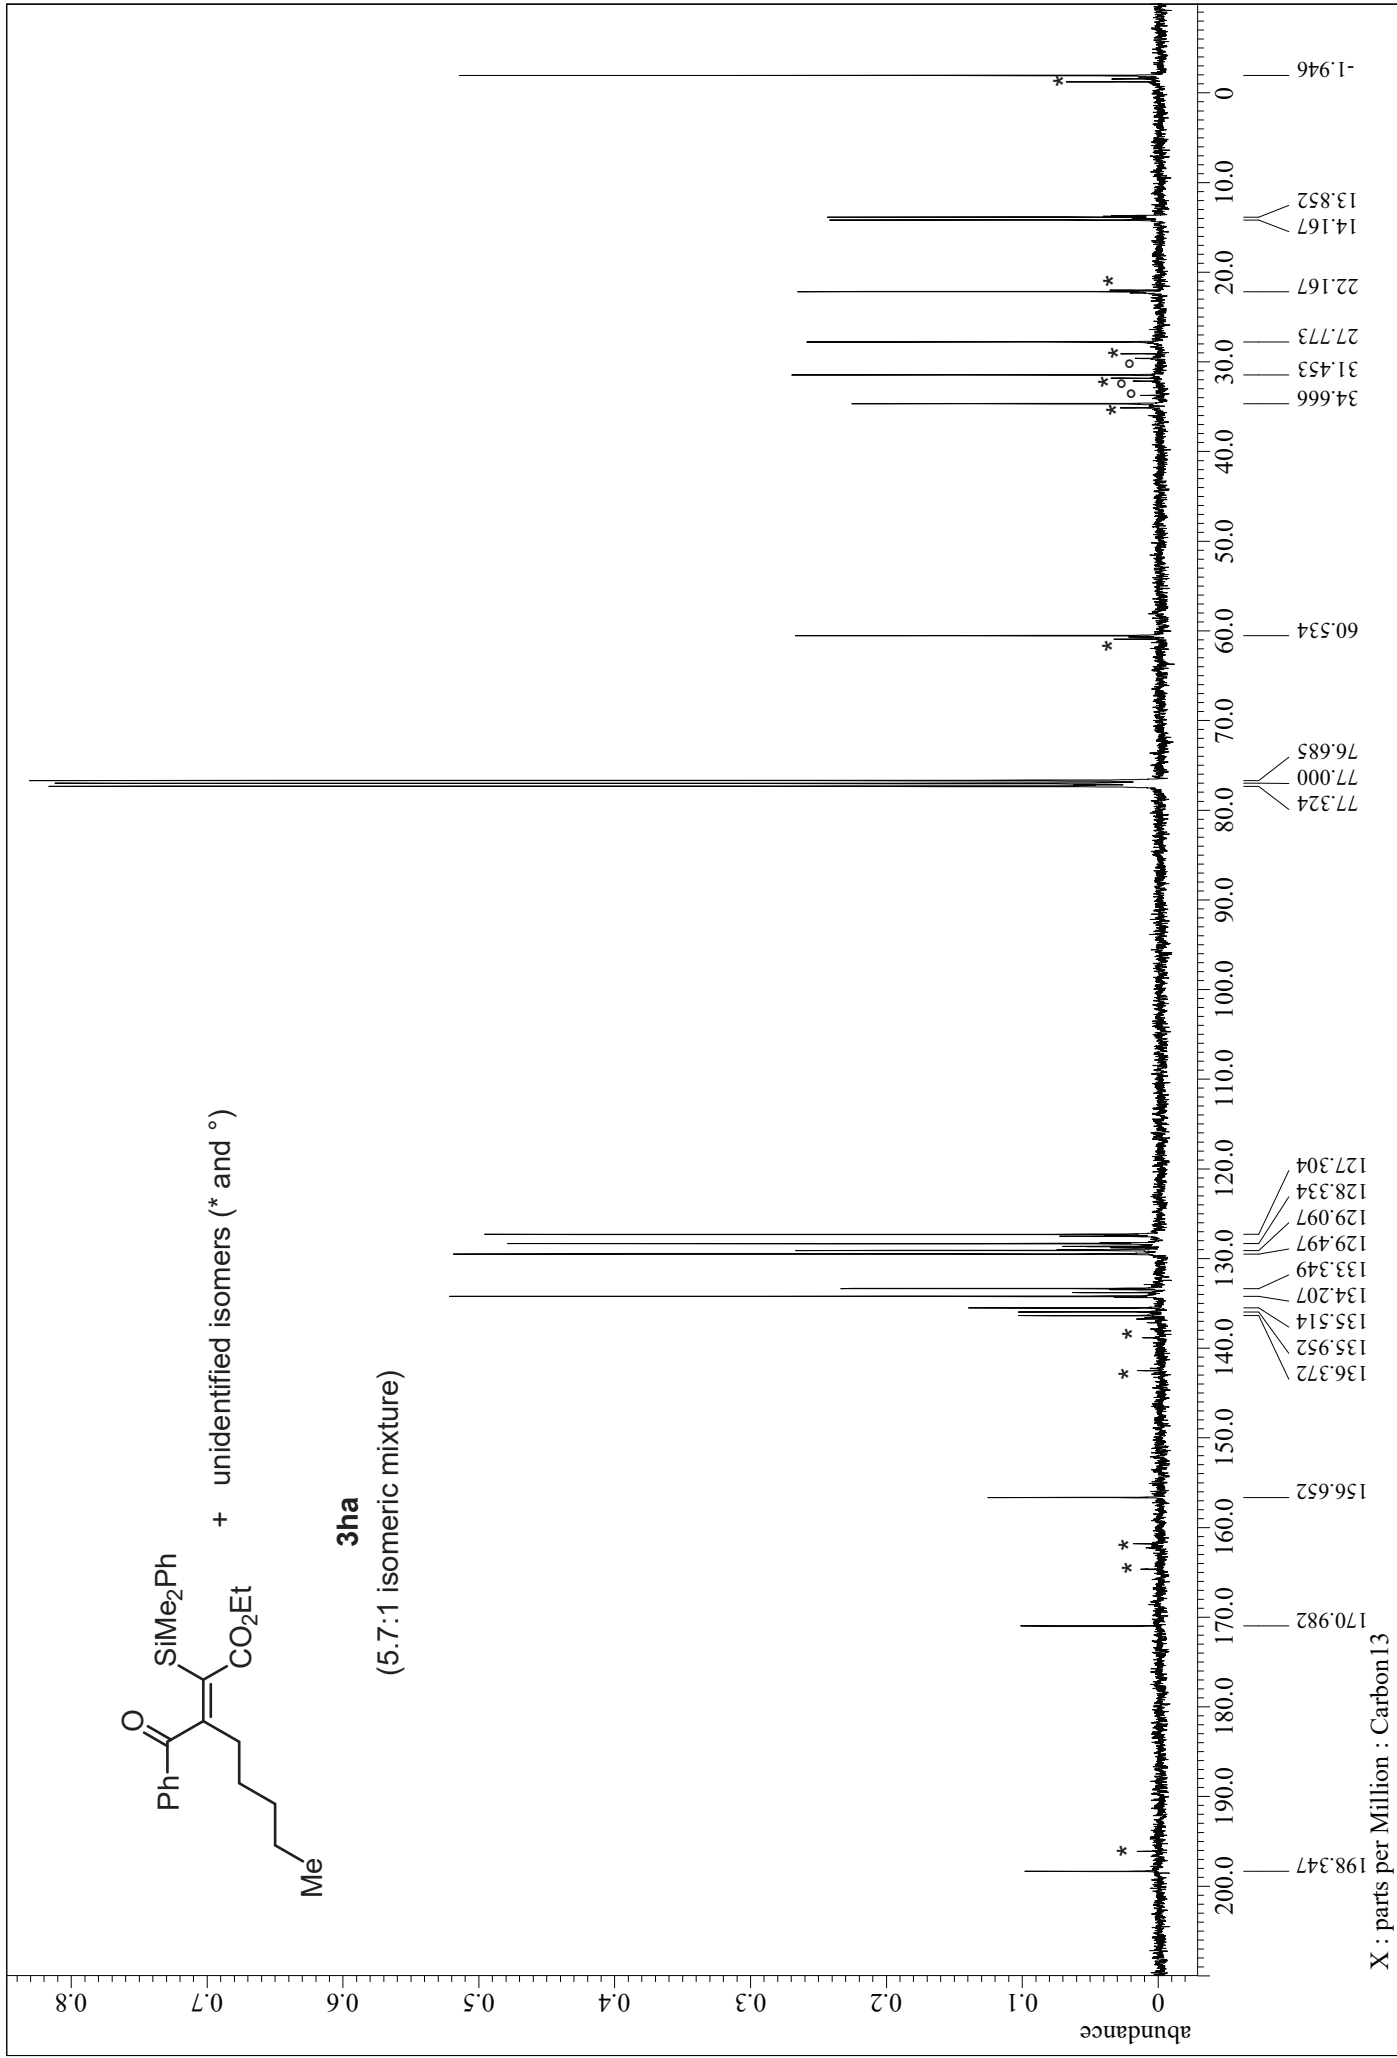

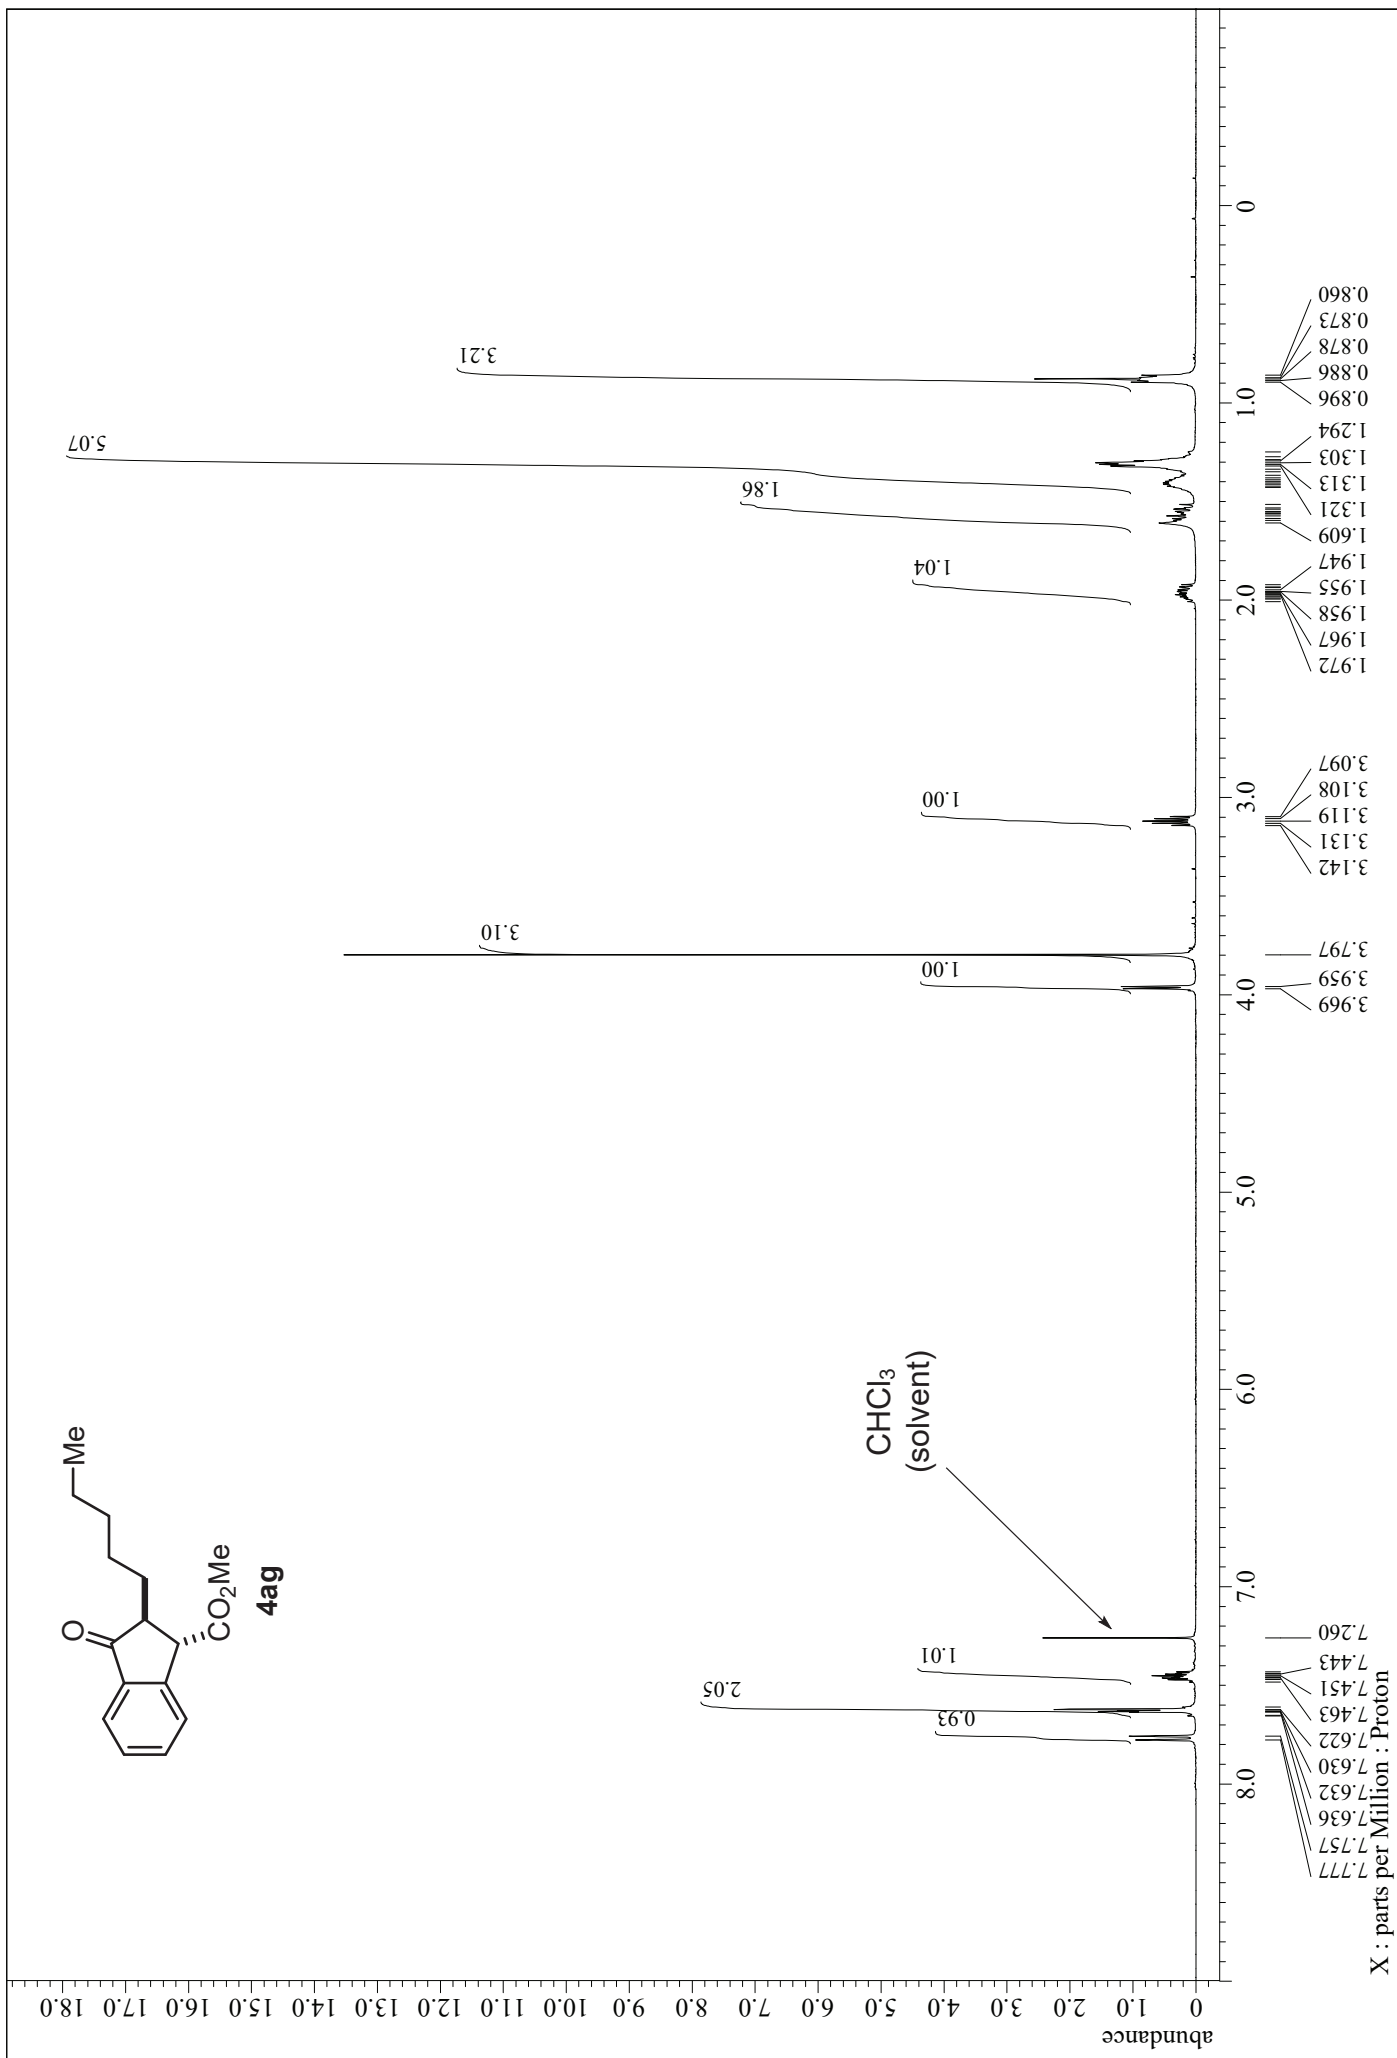

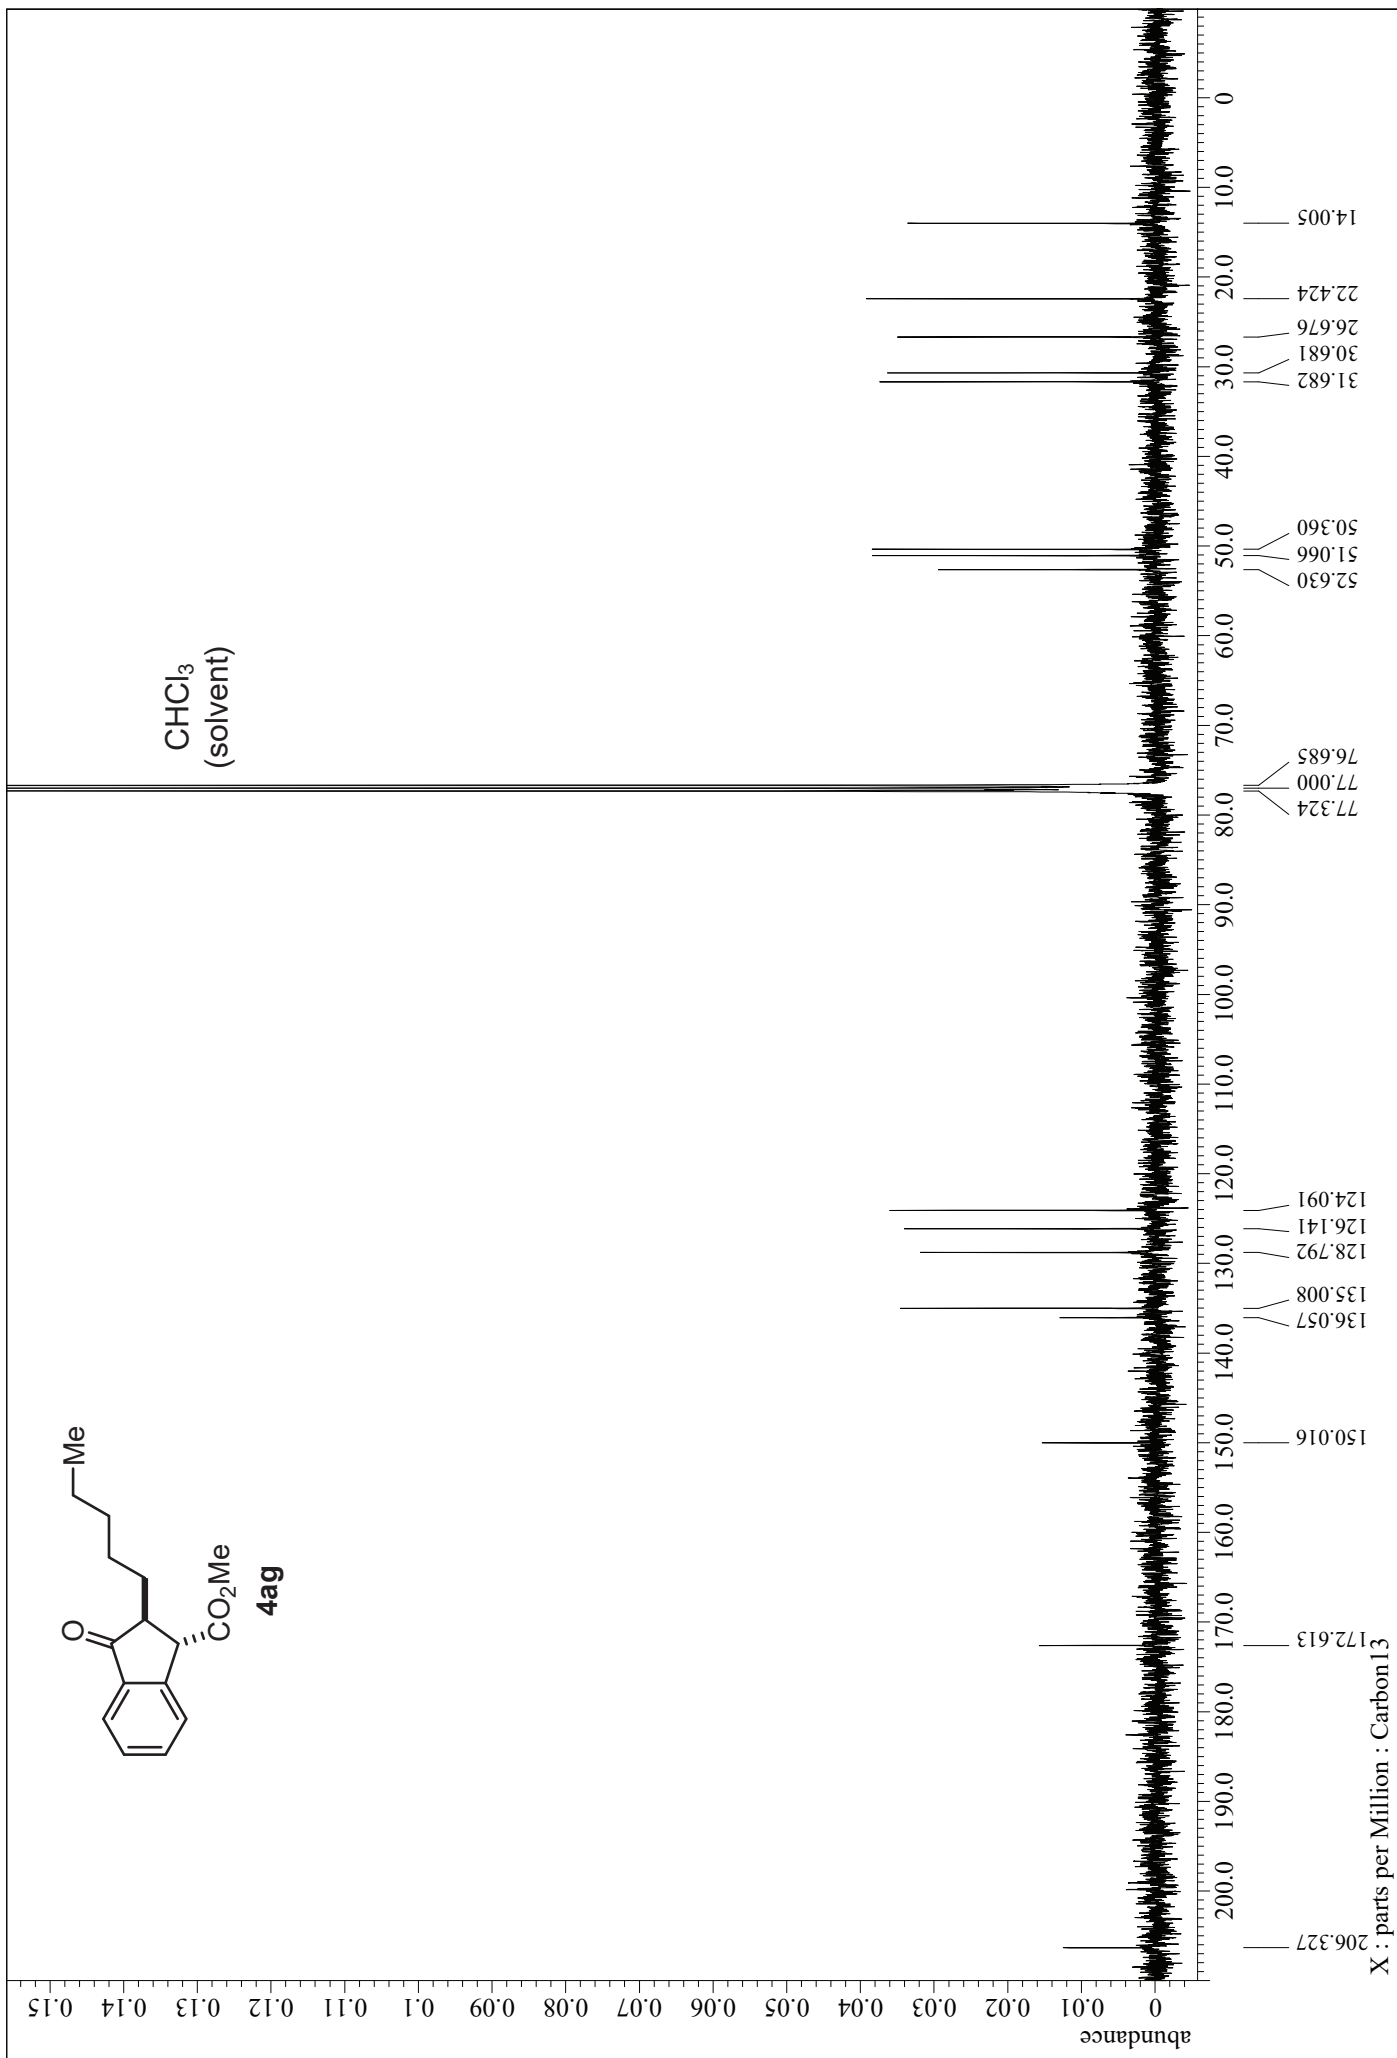

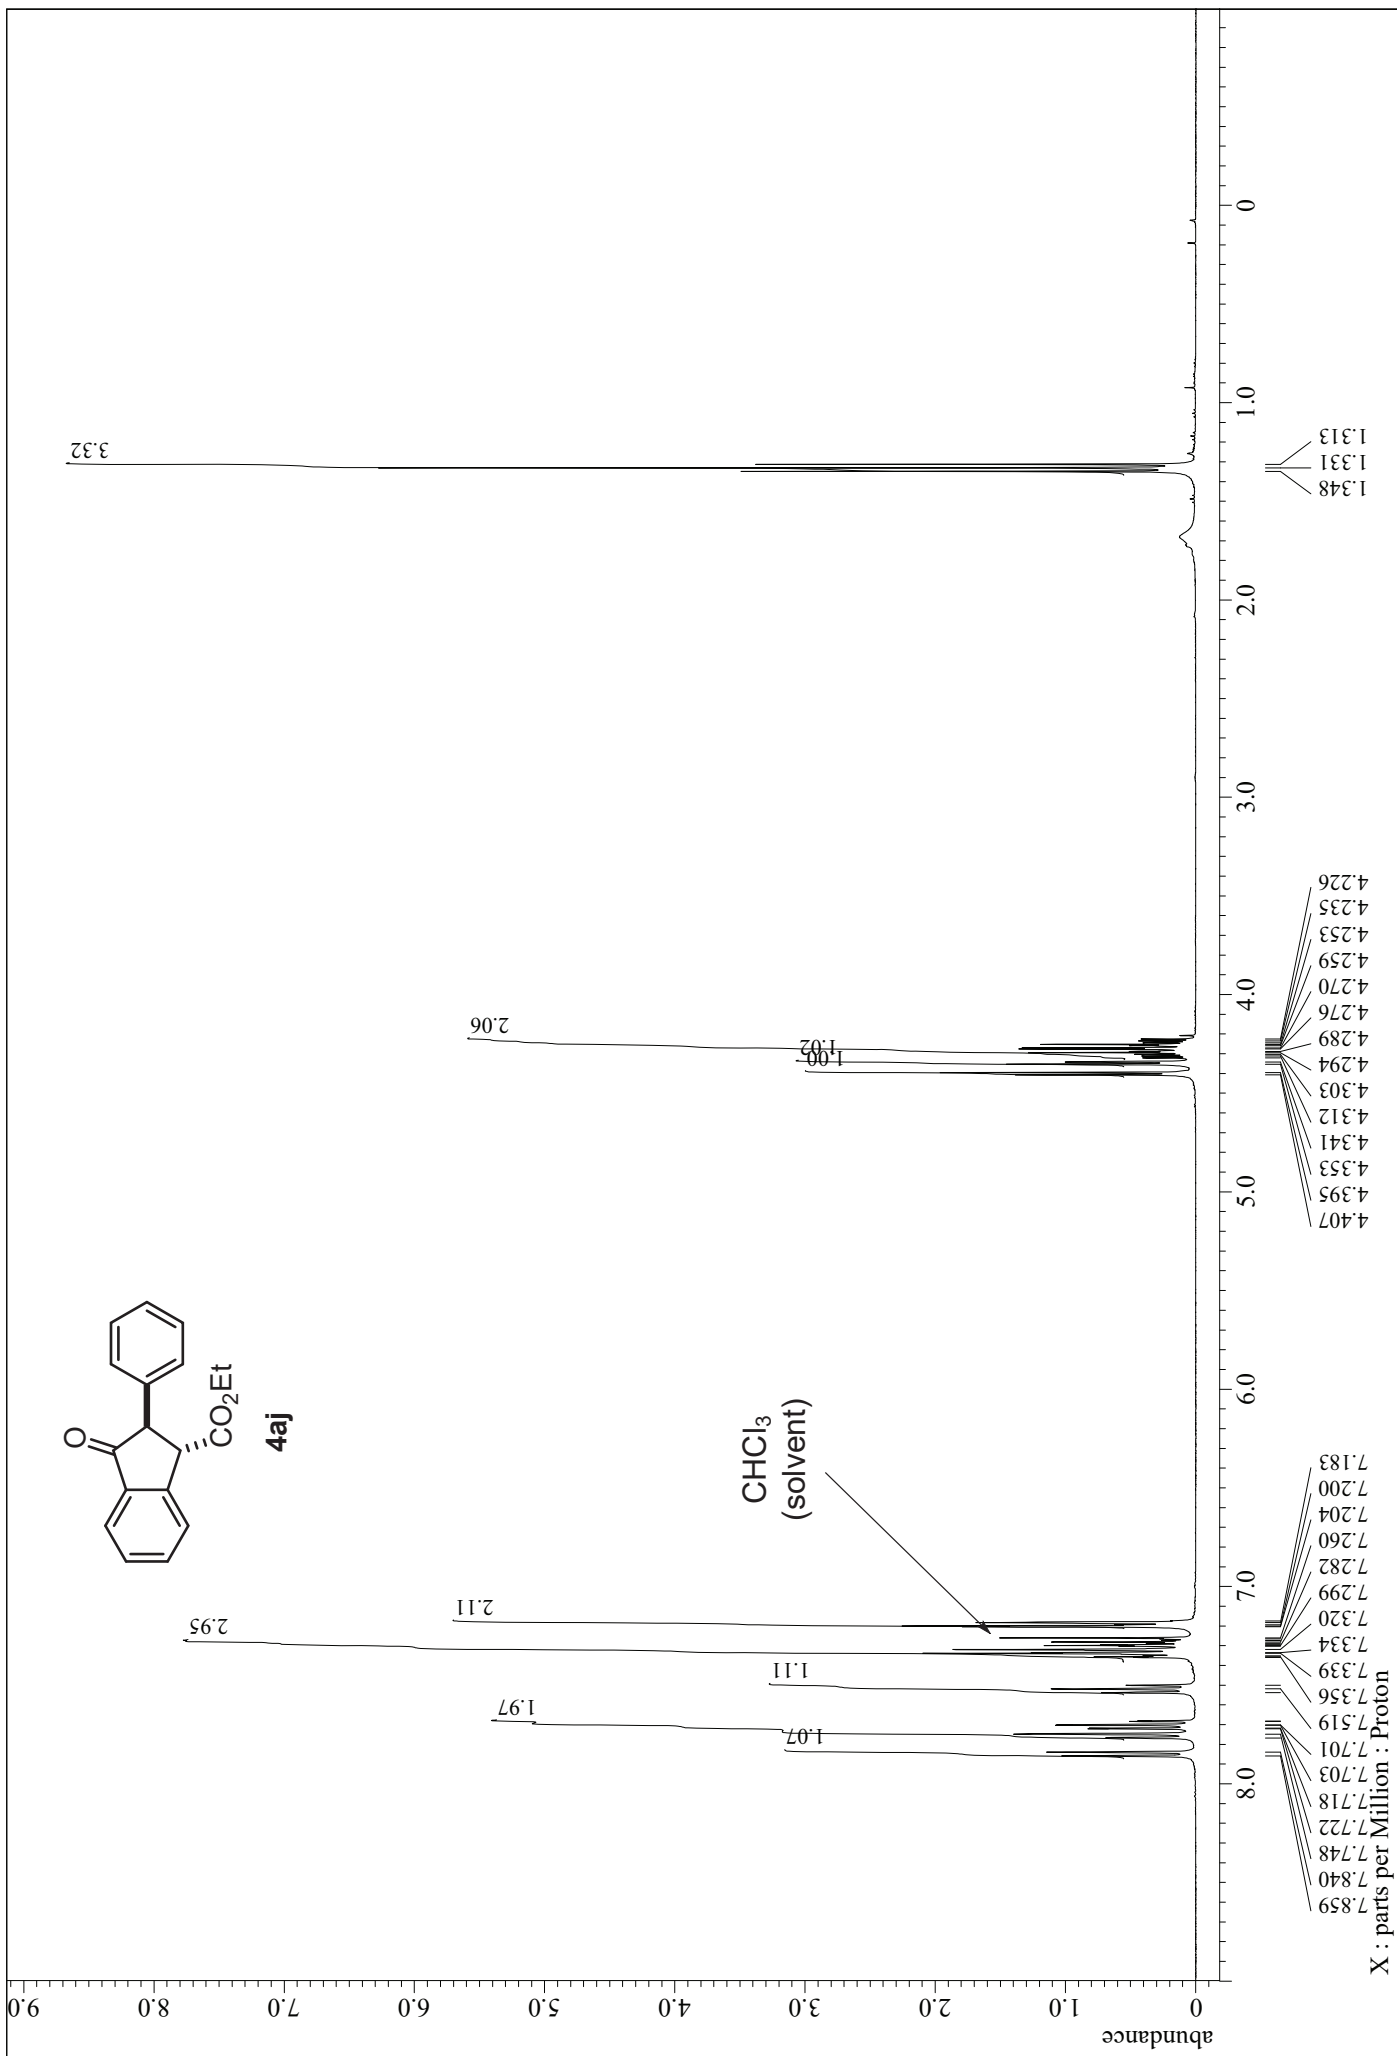

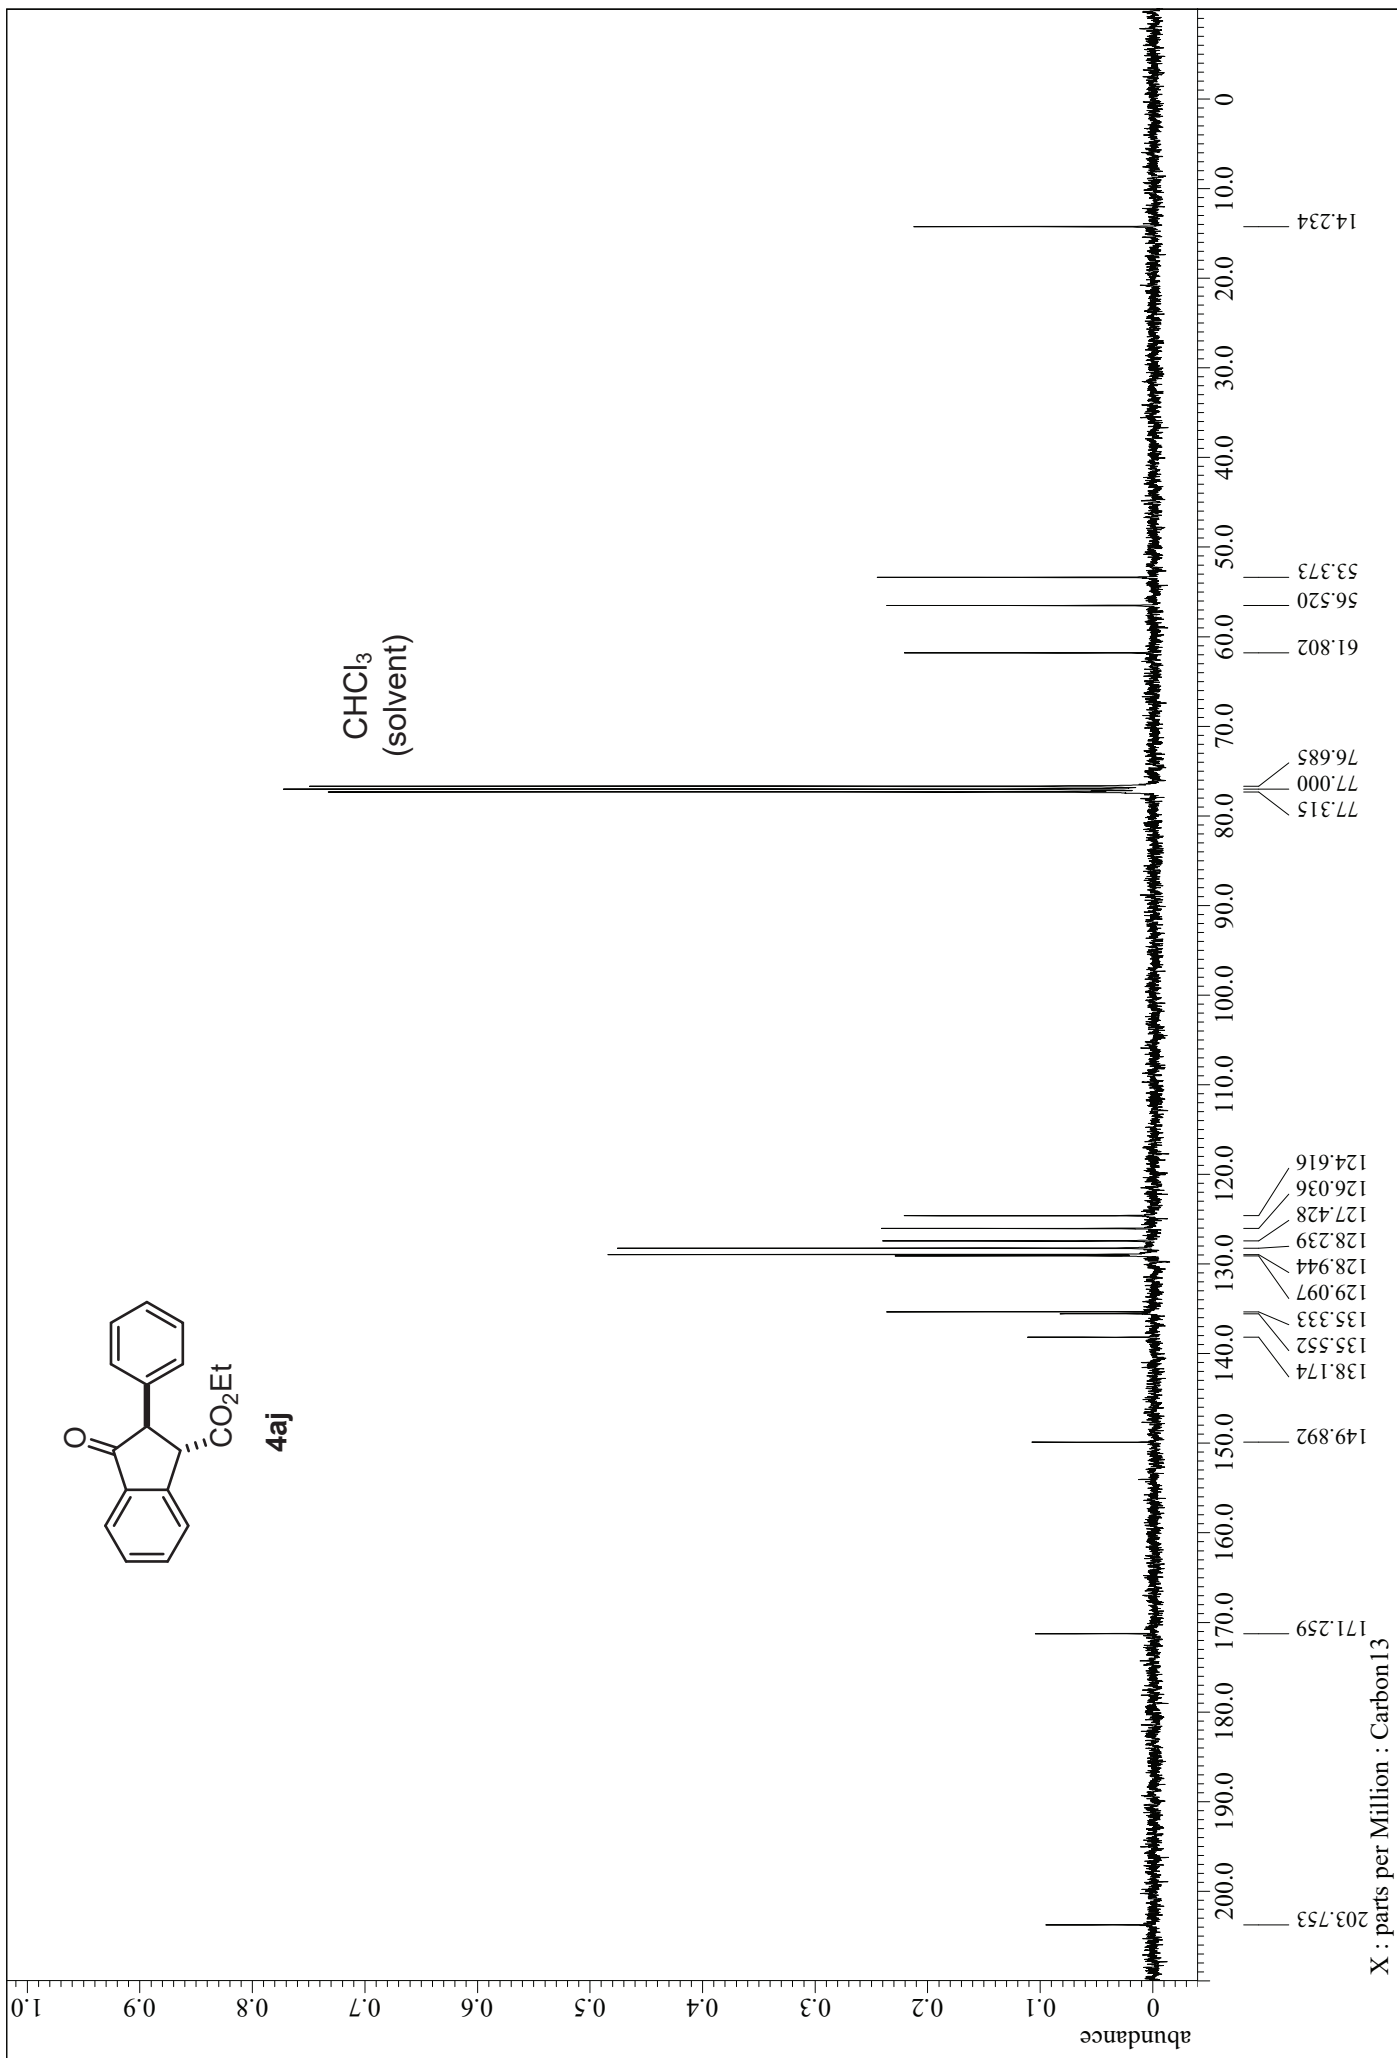

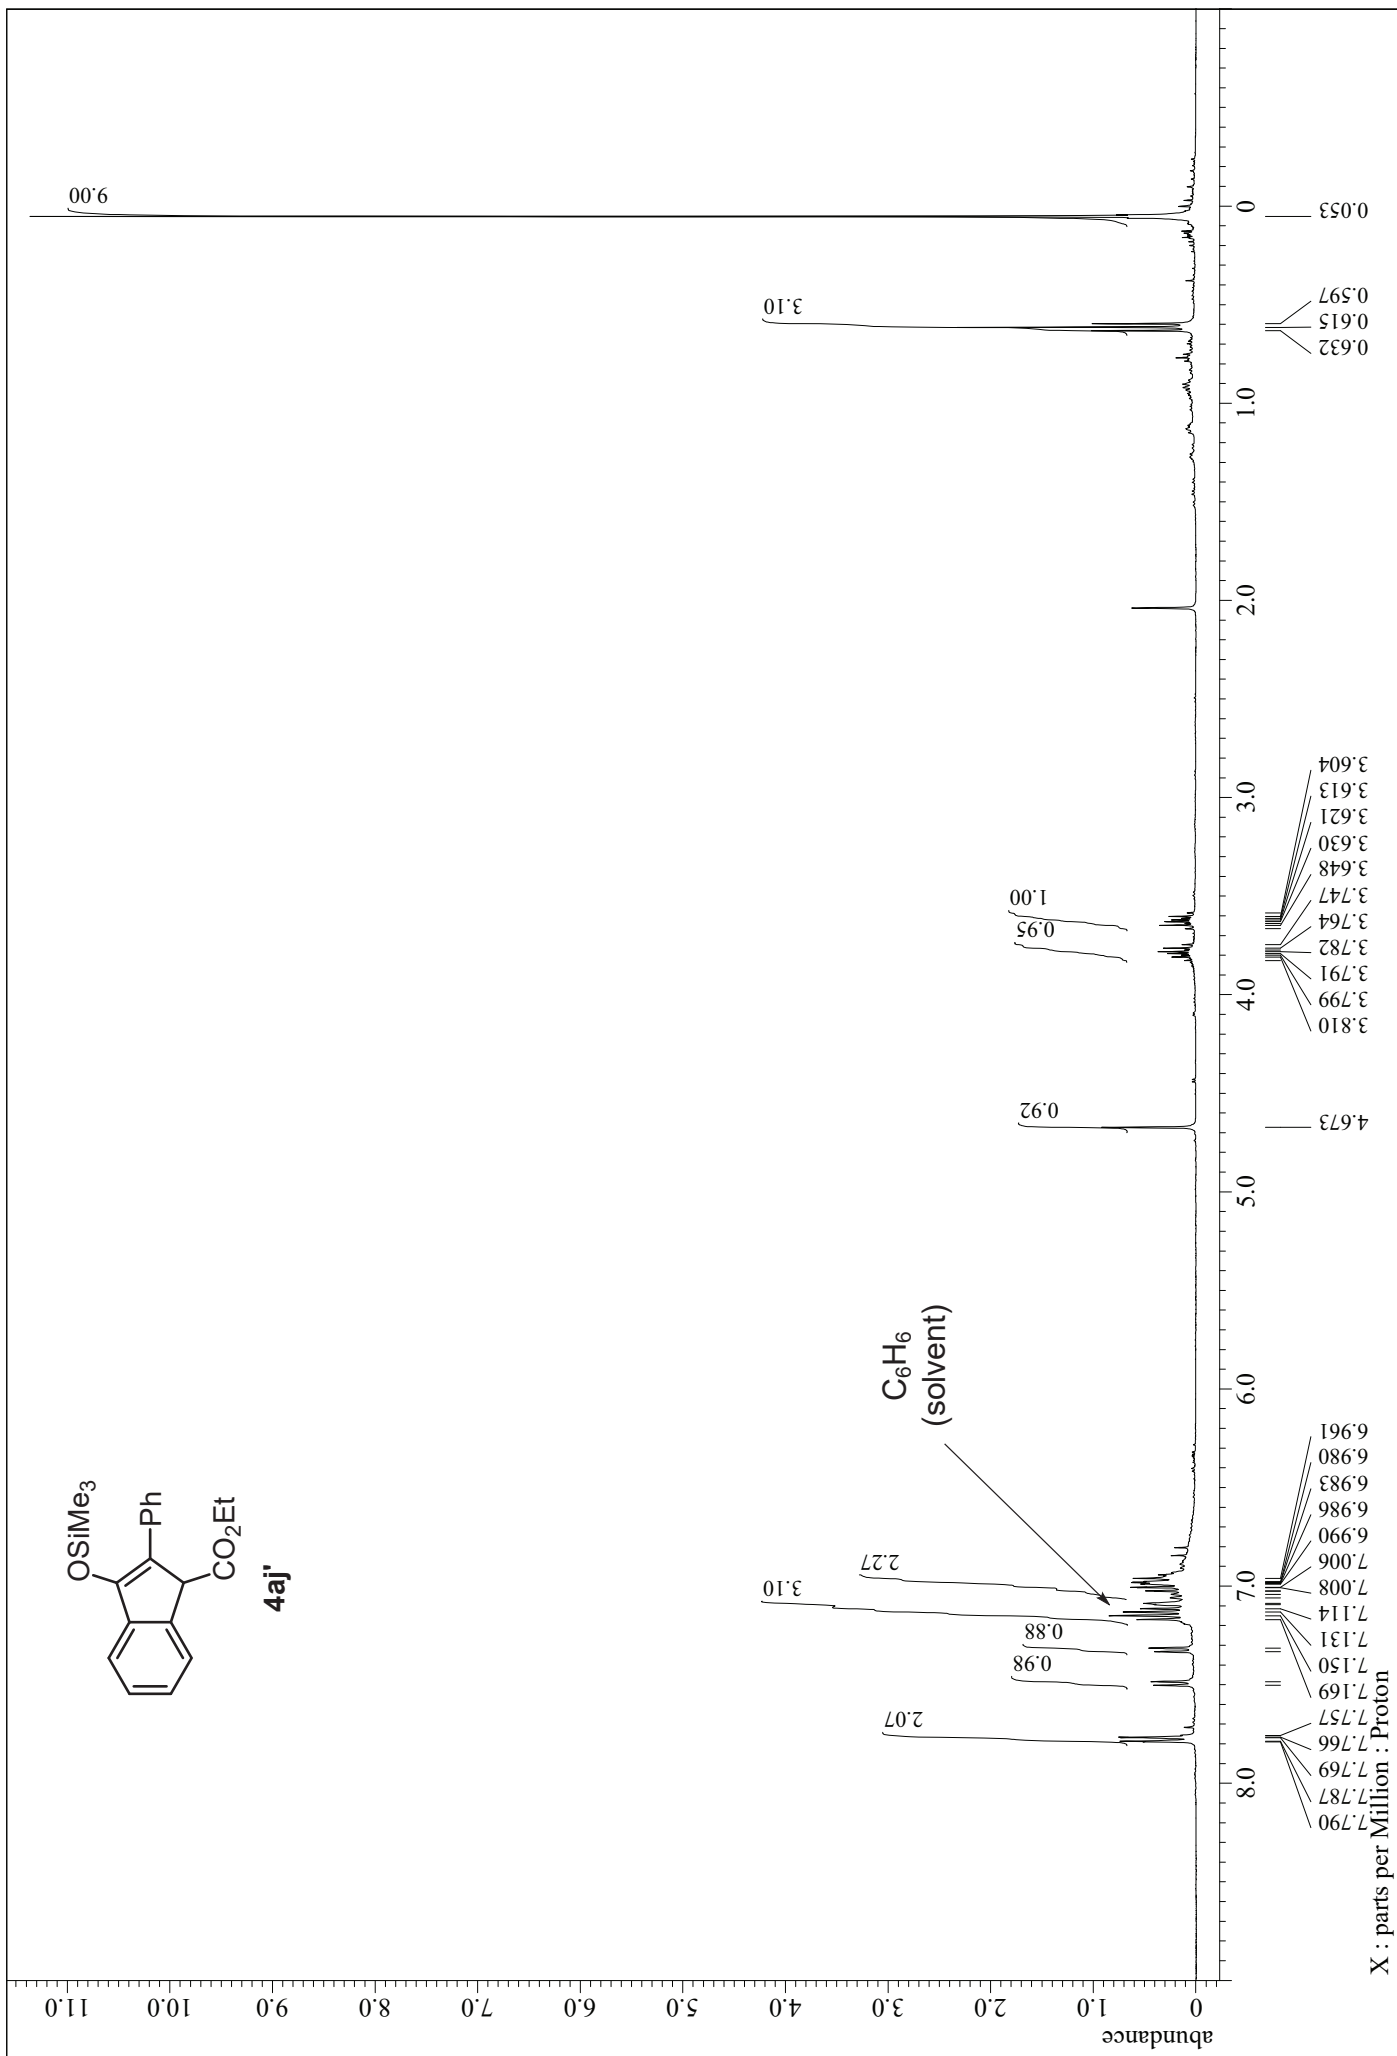



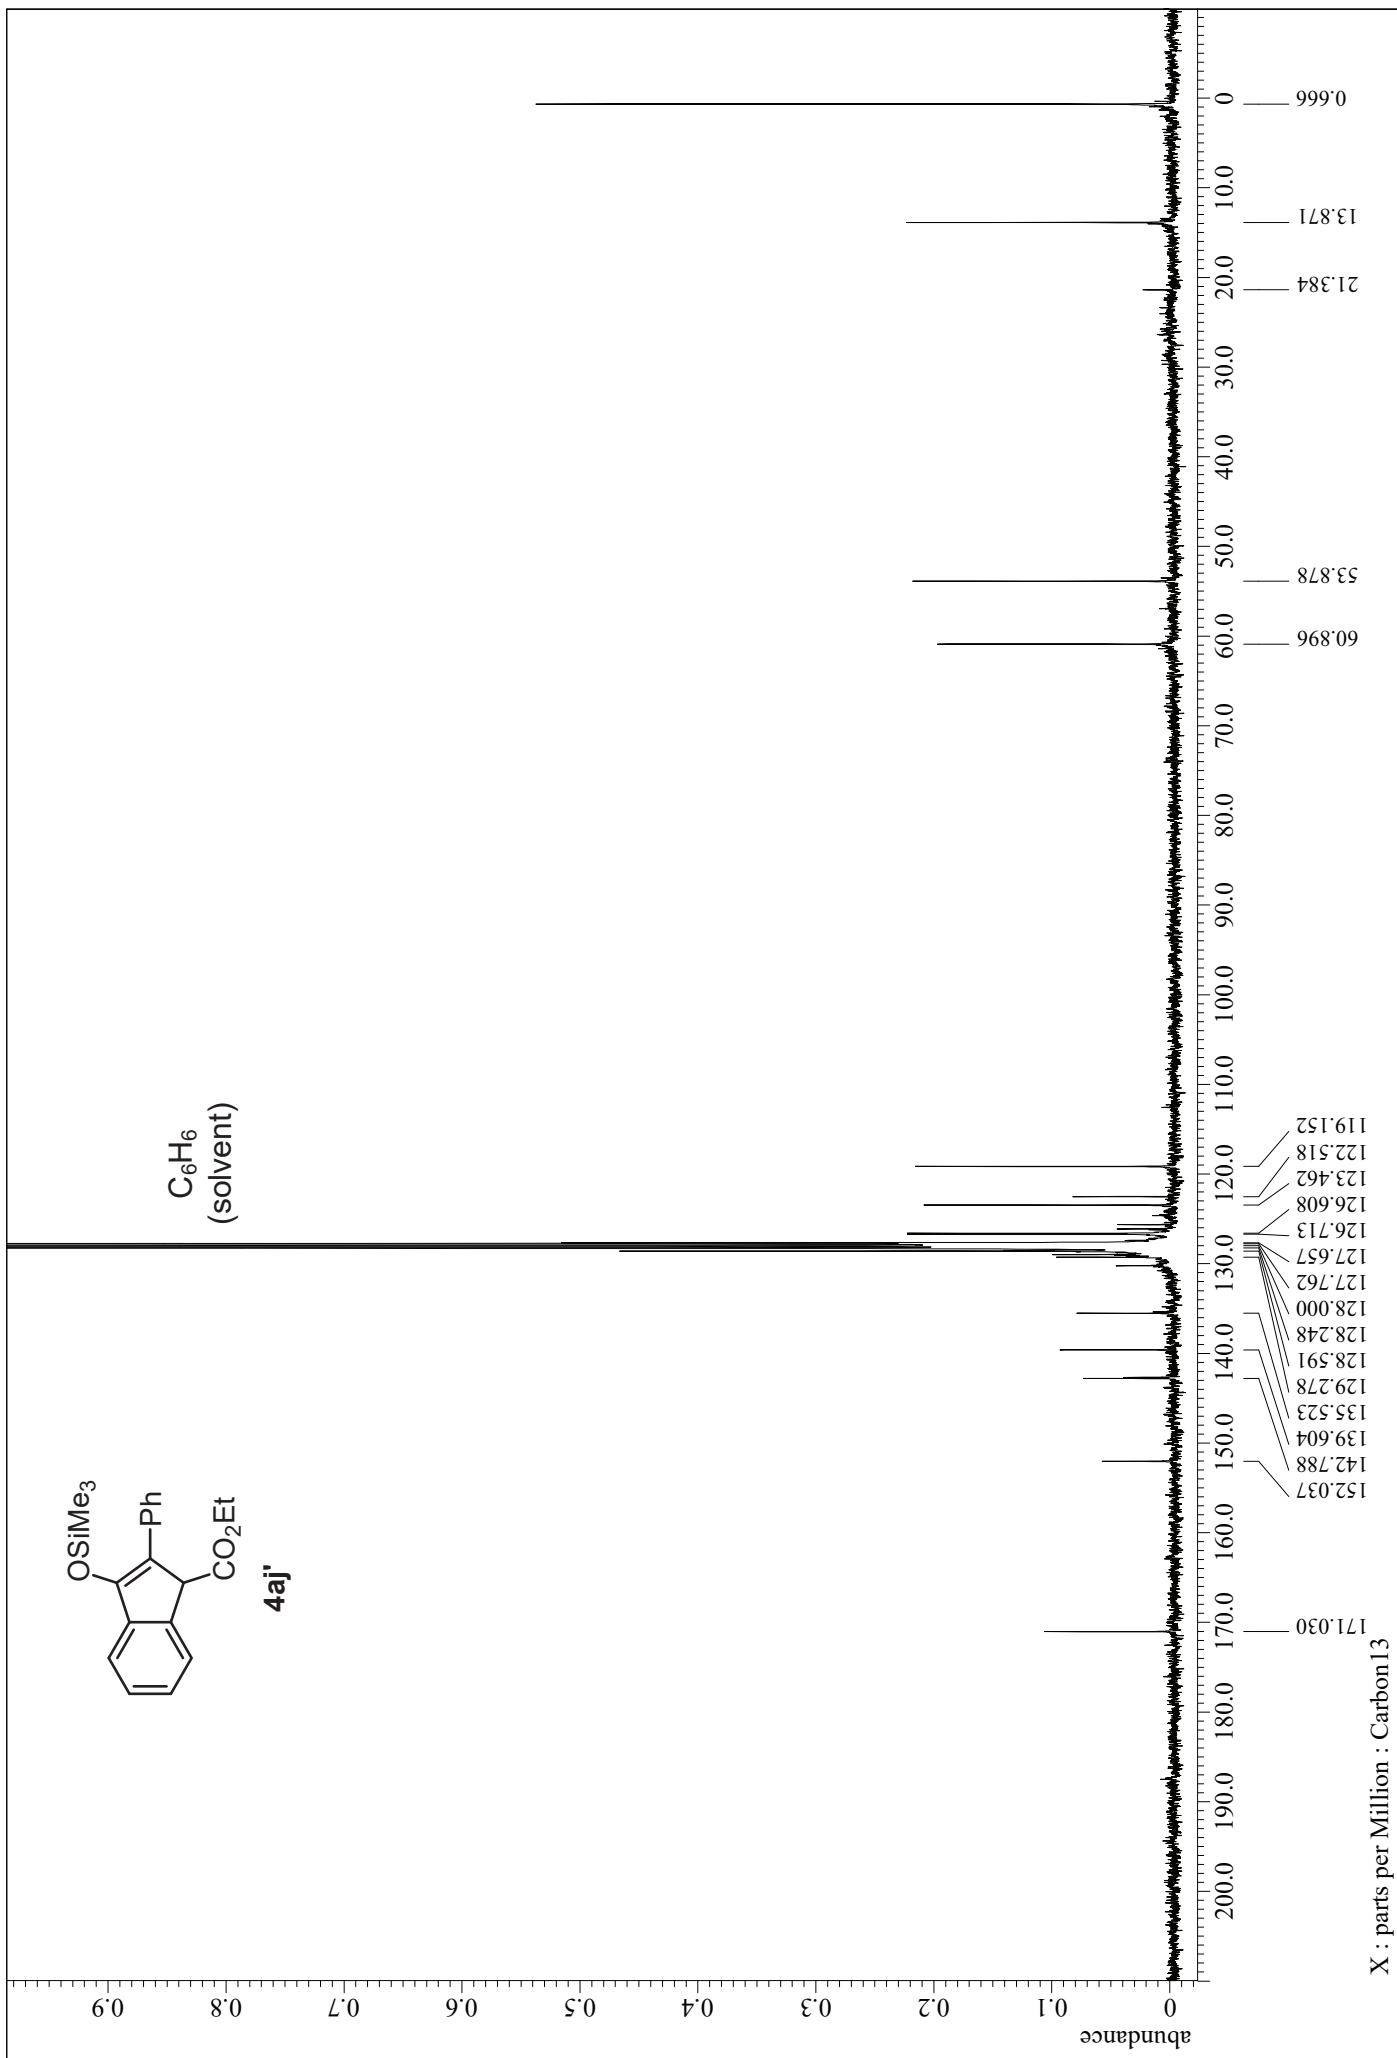

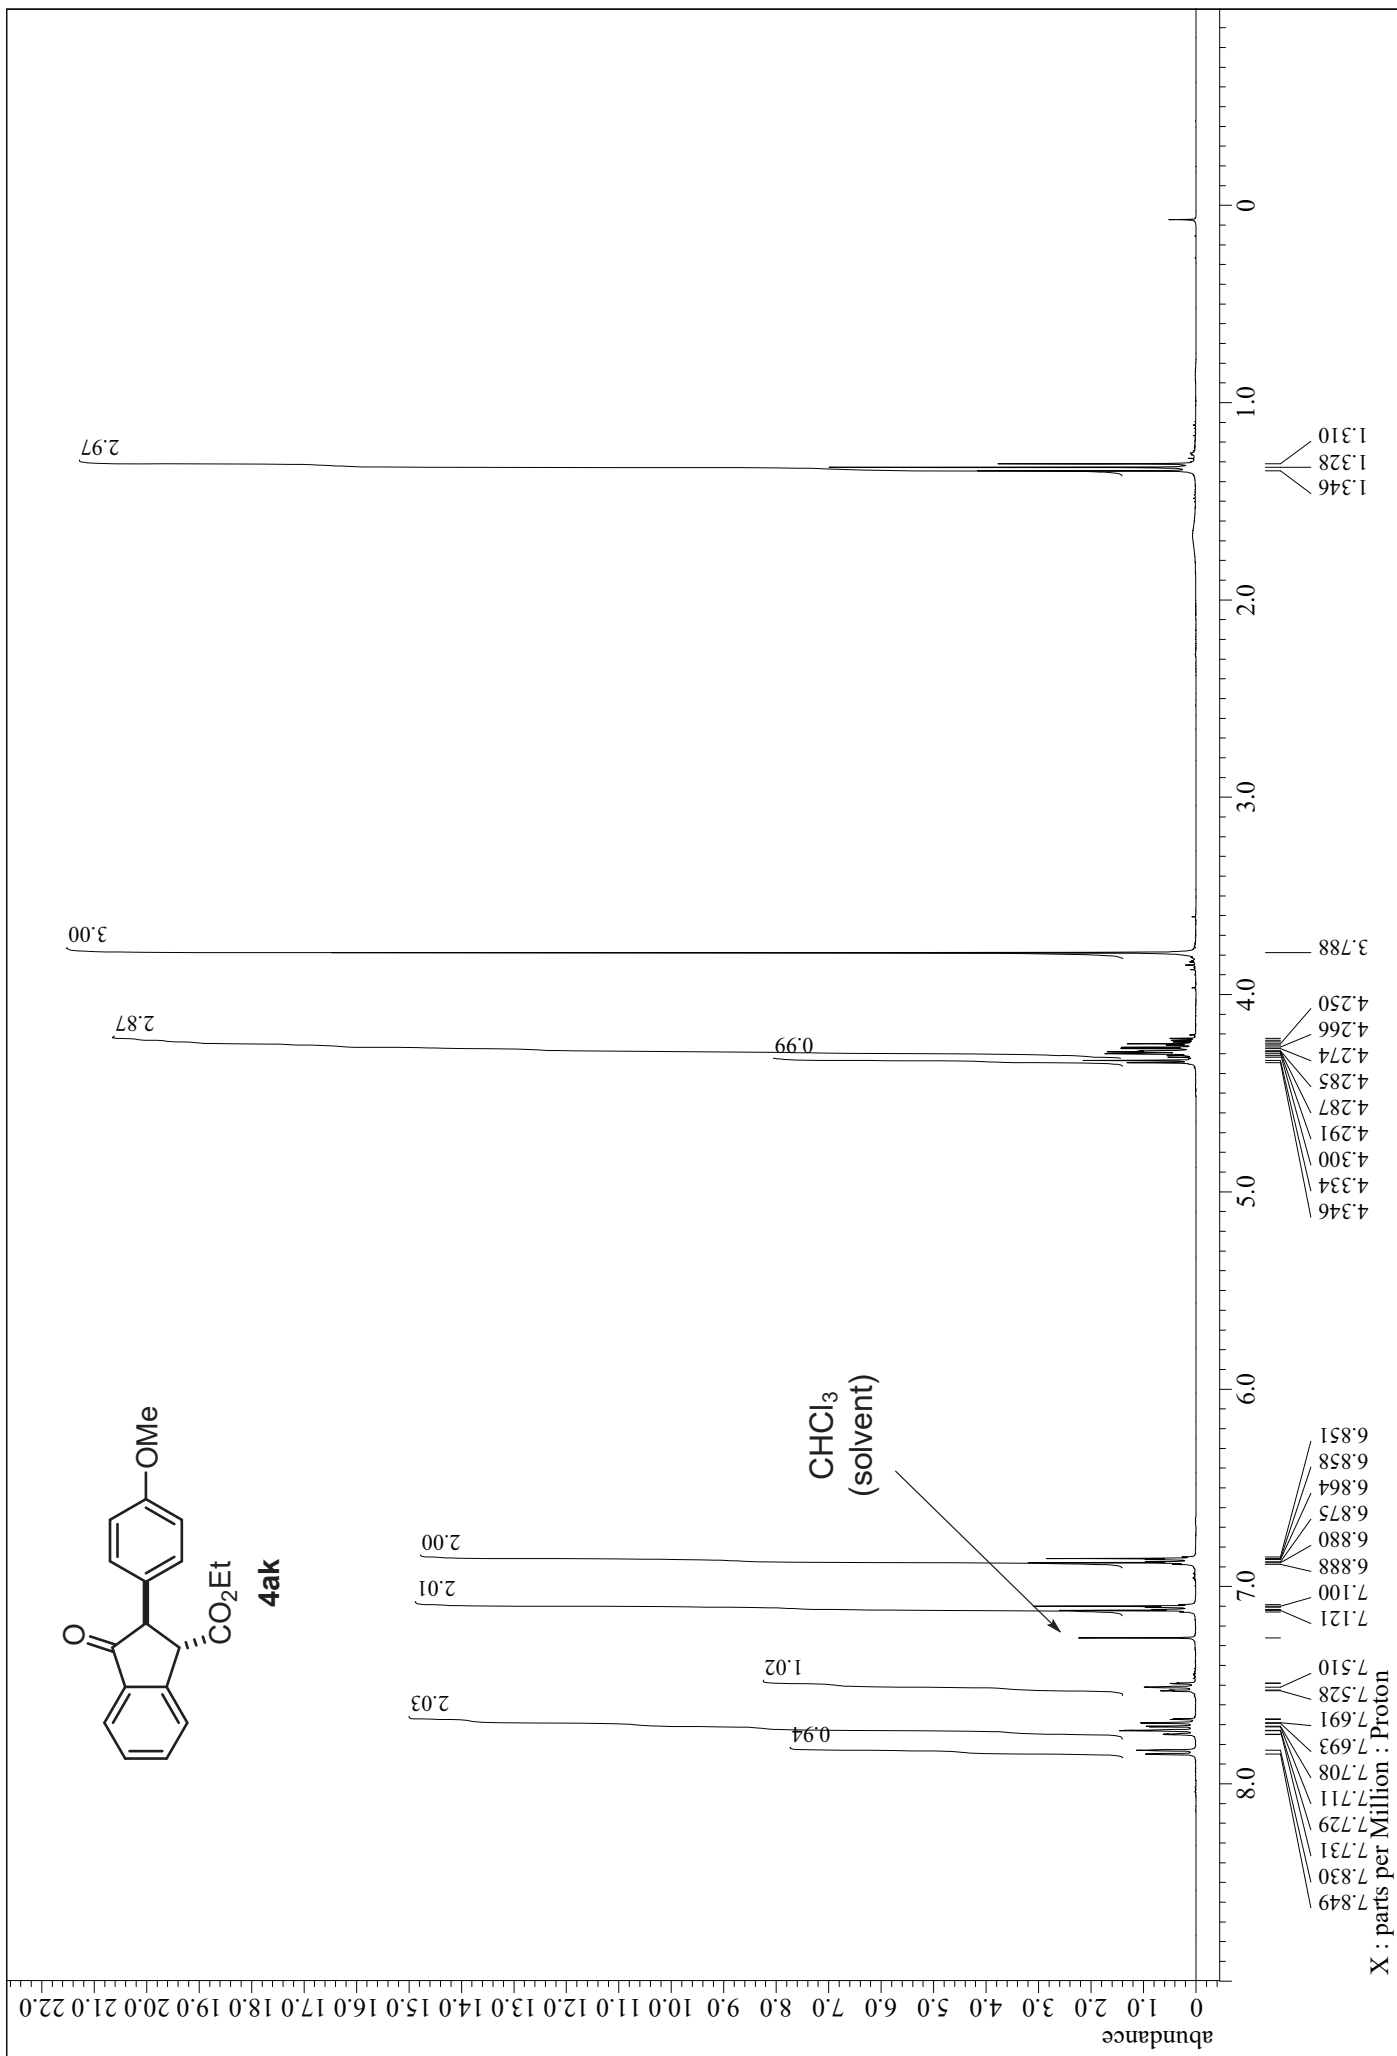

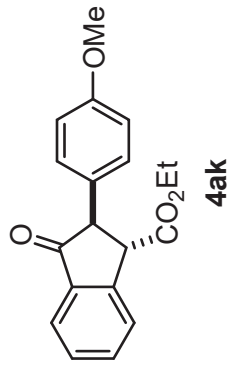

$\text{CHCl}_3$   
(solvent)

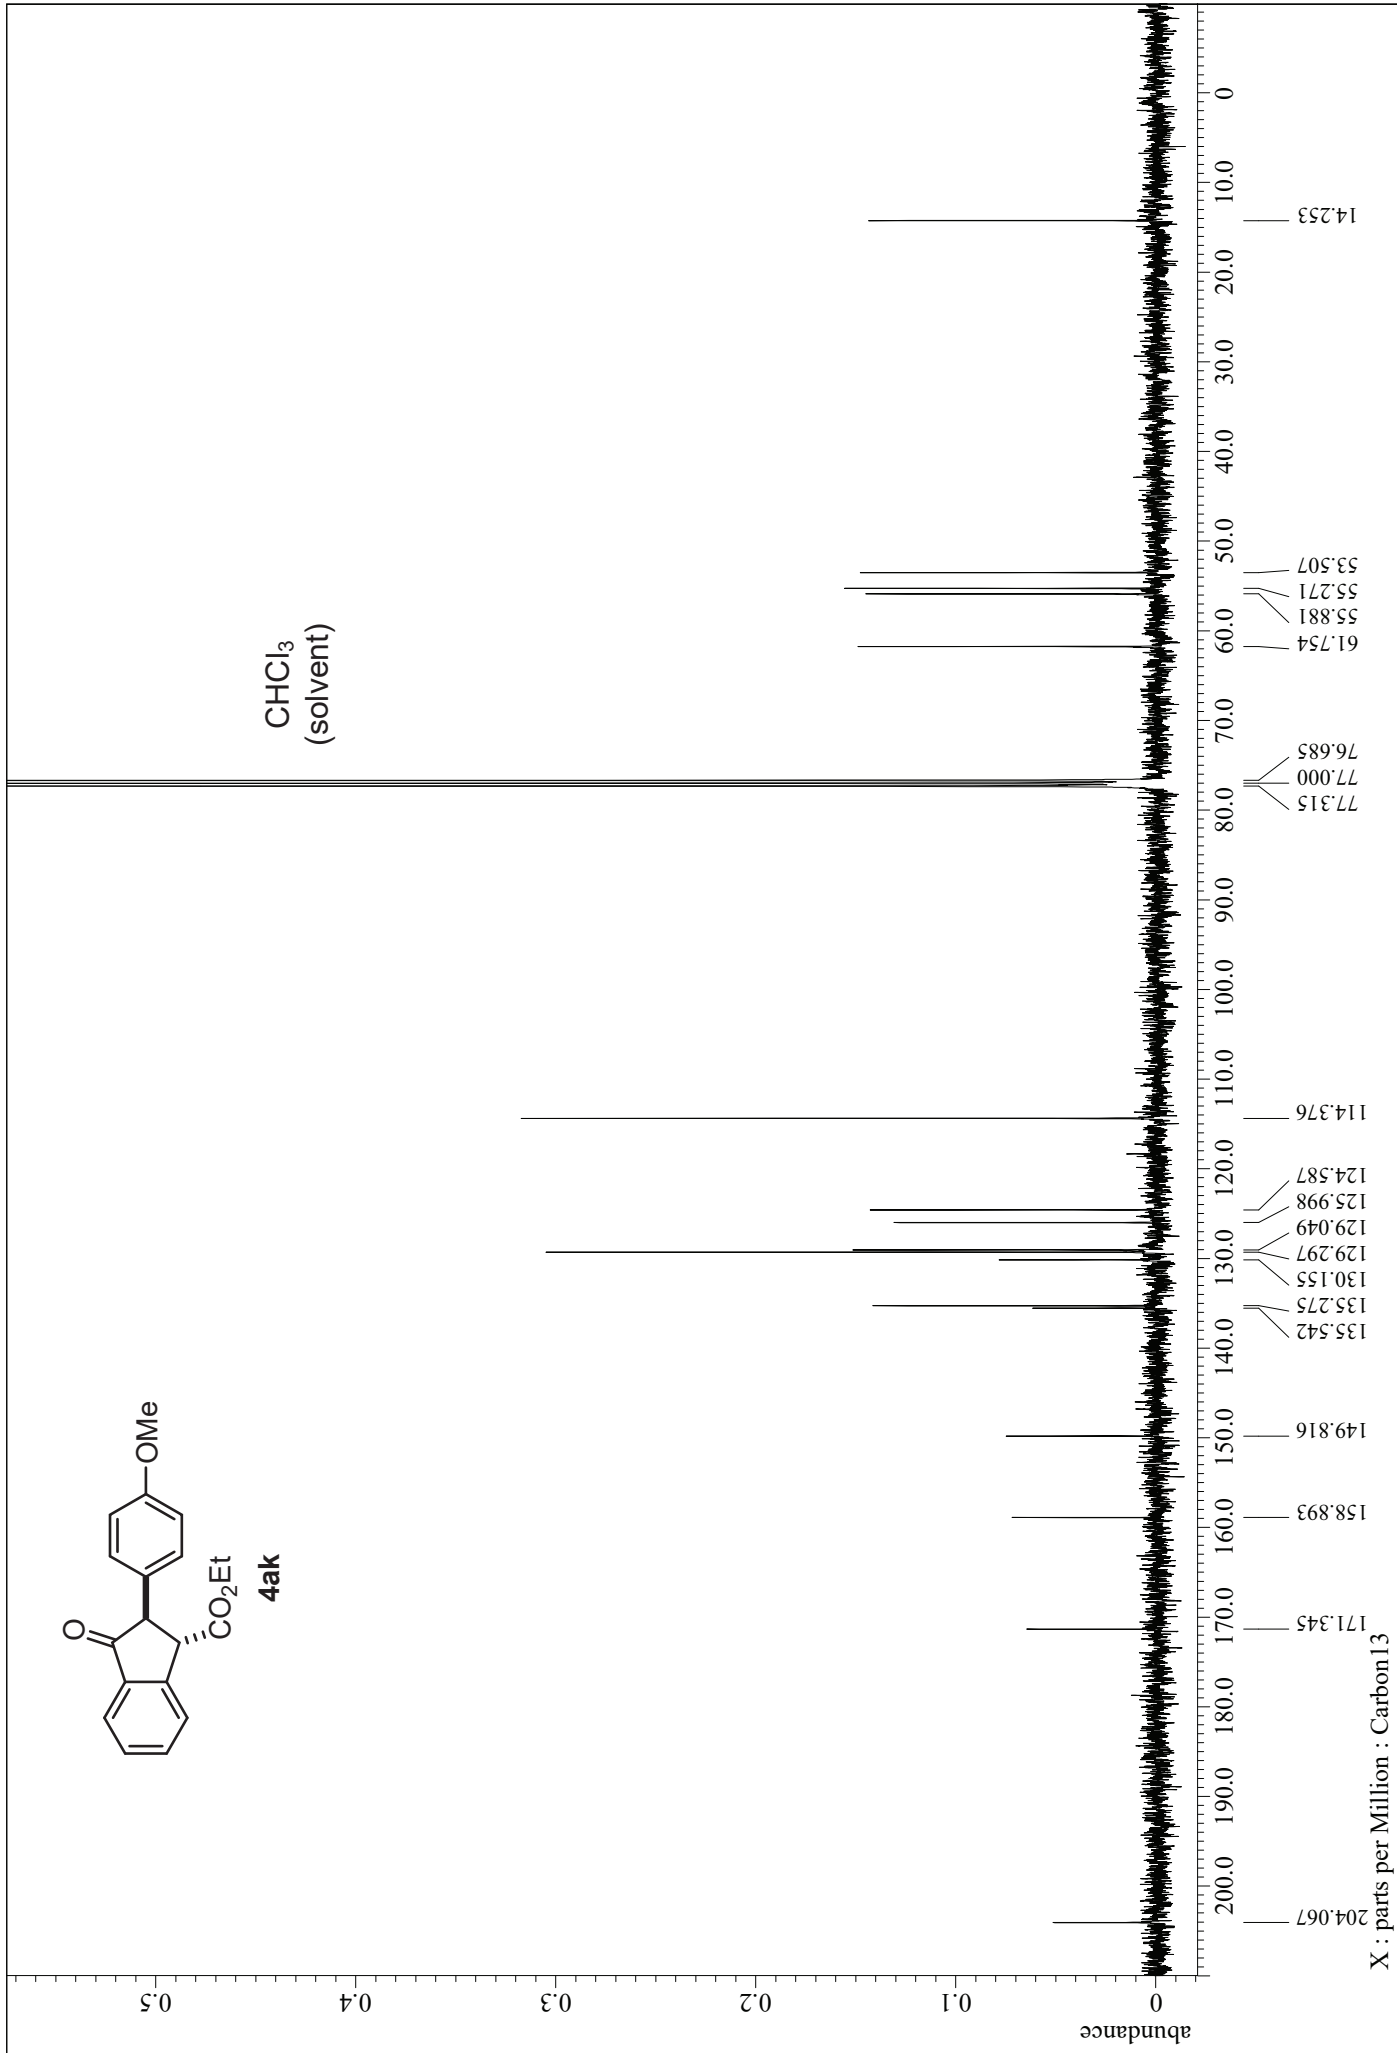

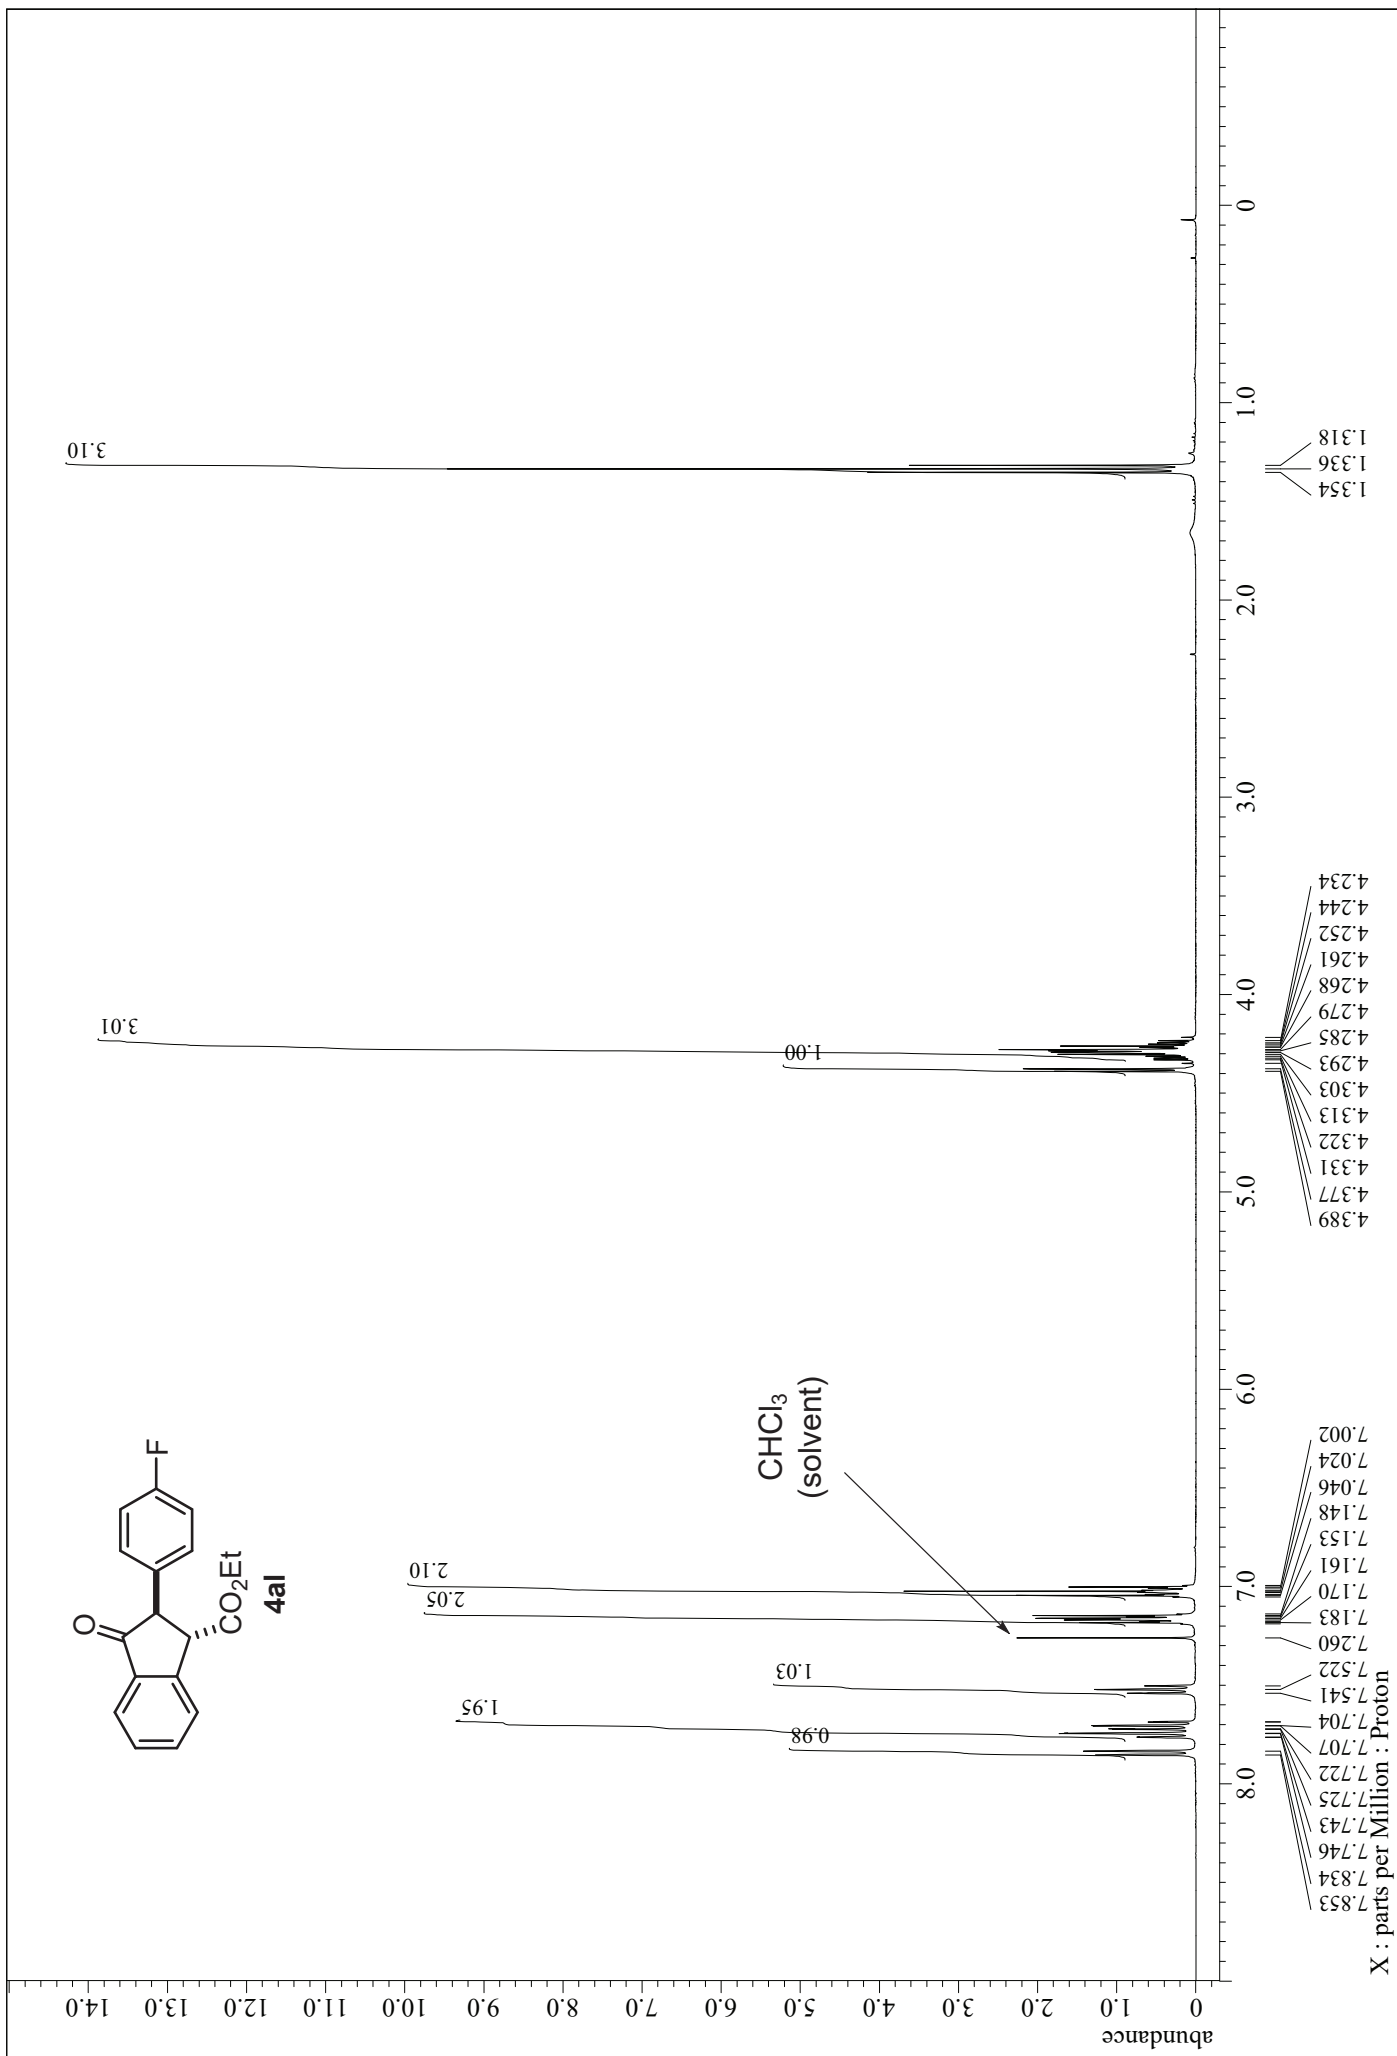

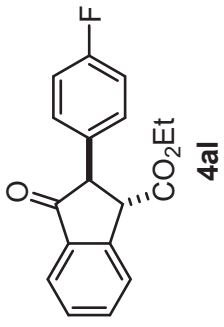

CHCl<sub>3</sub>  
(solvent)

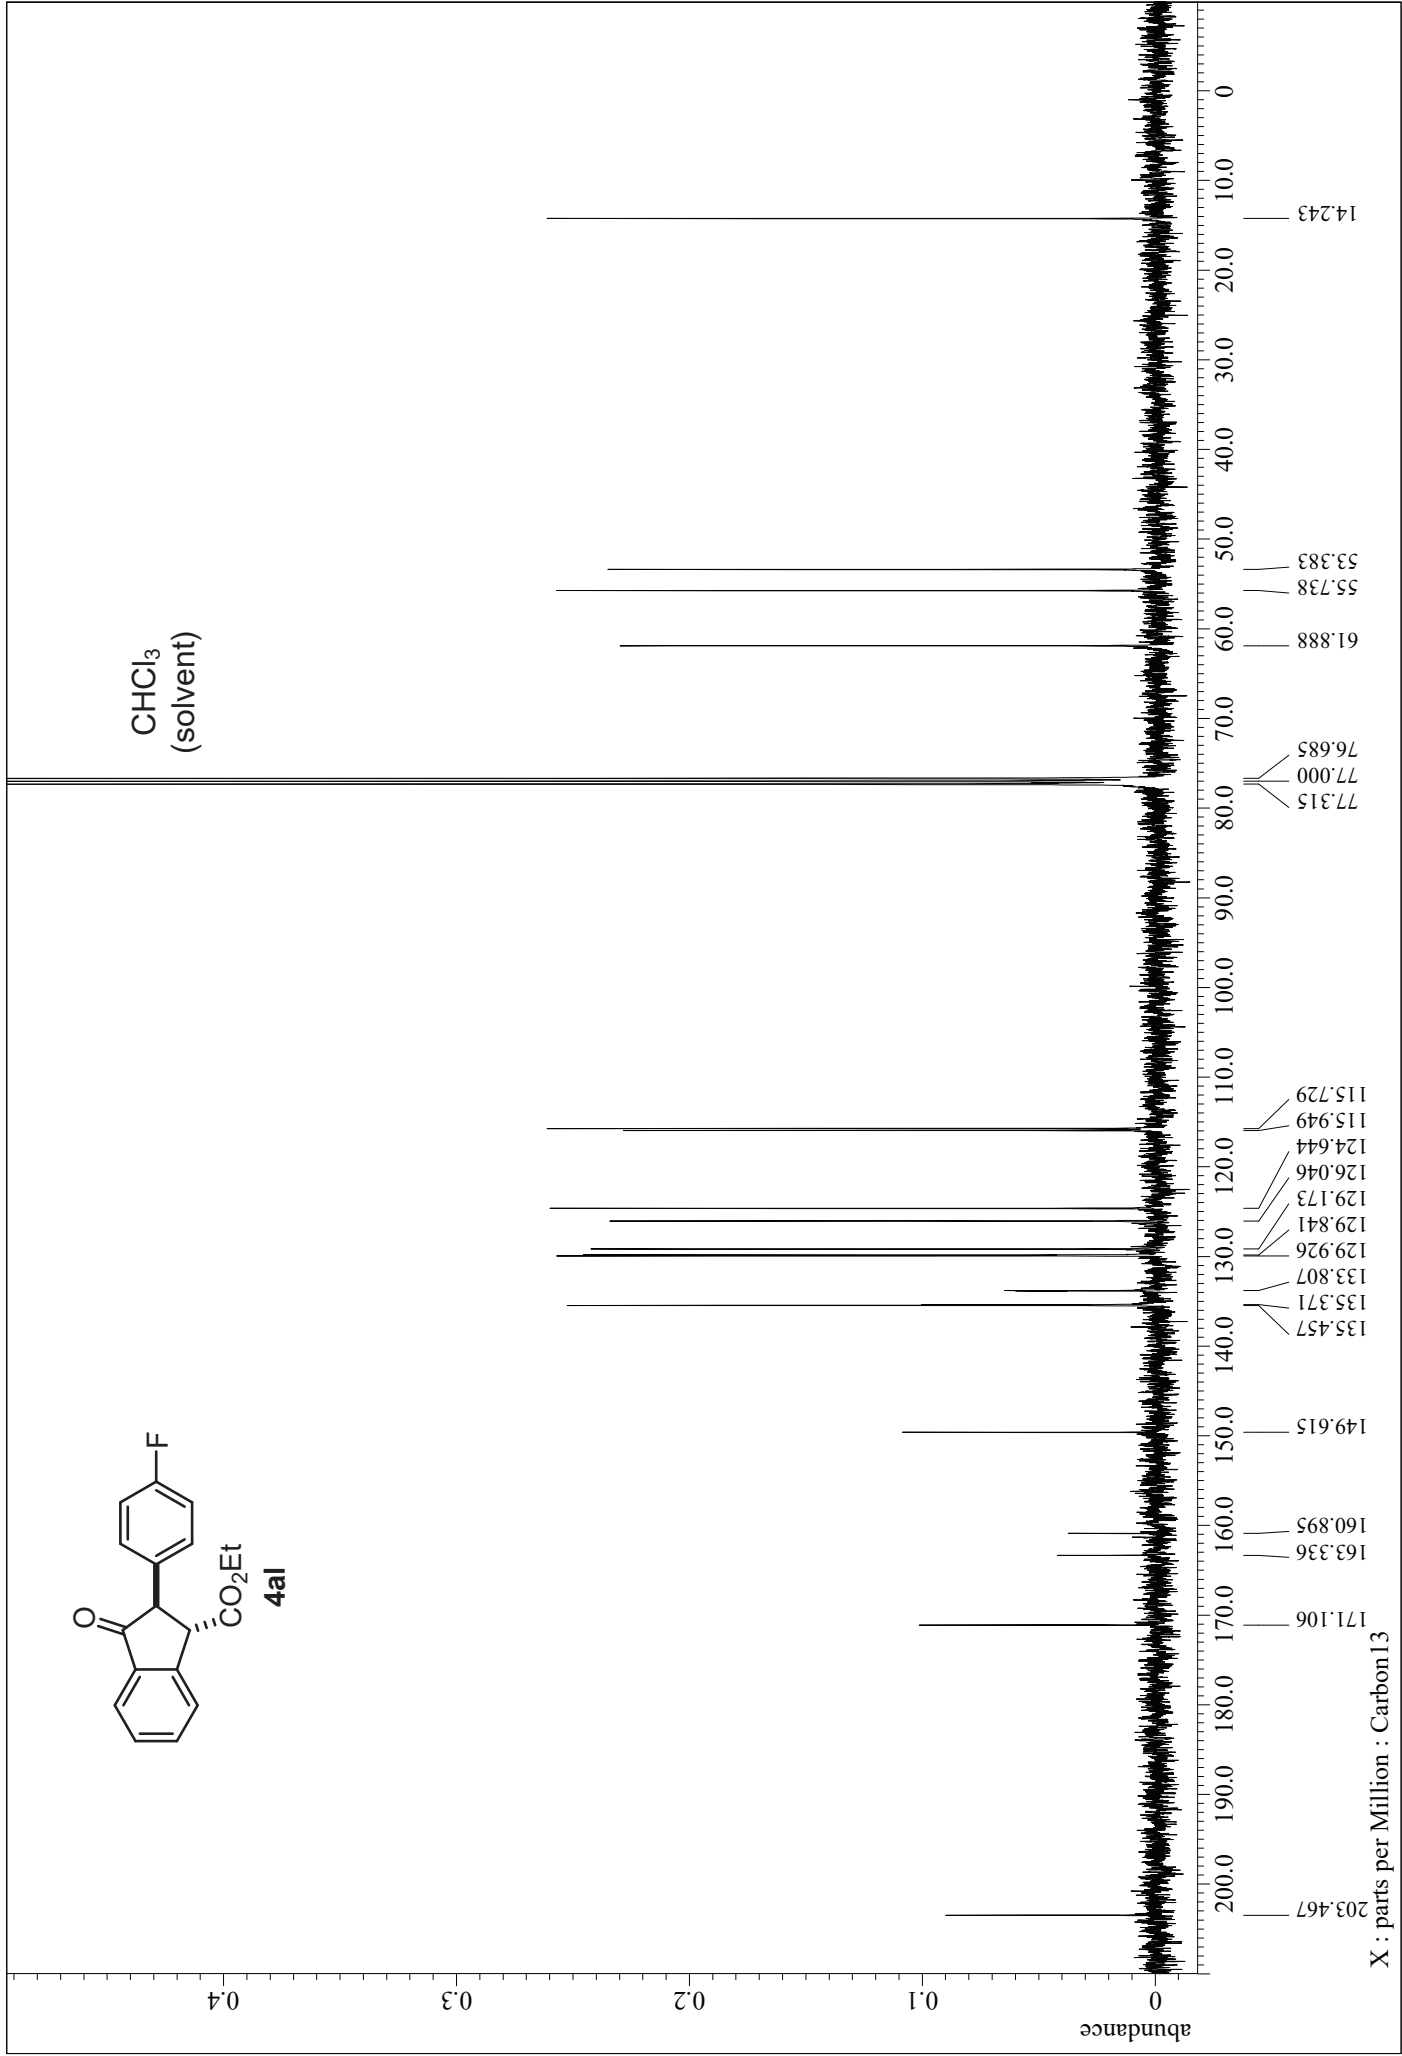

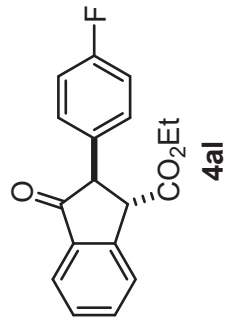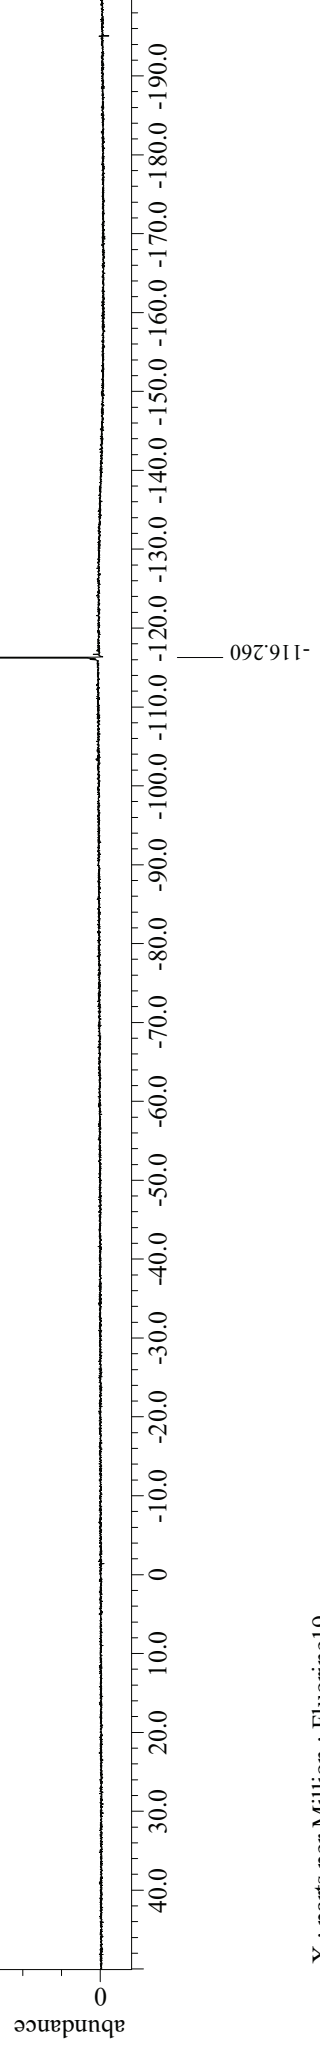

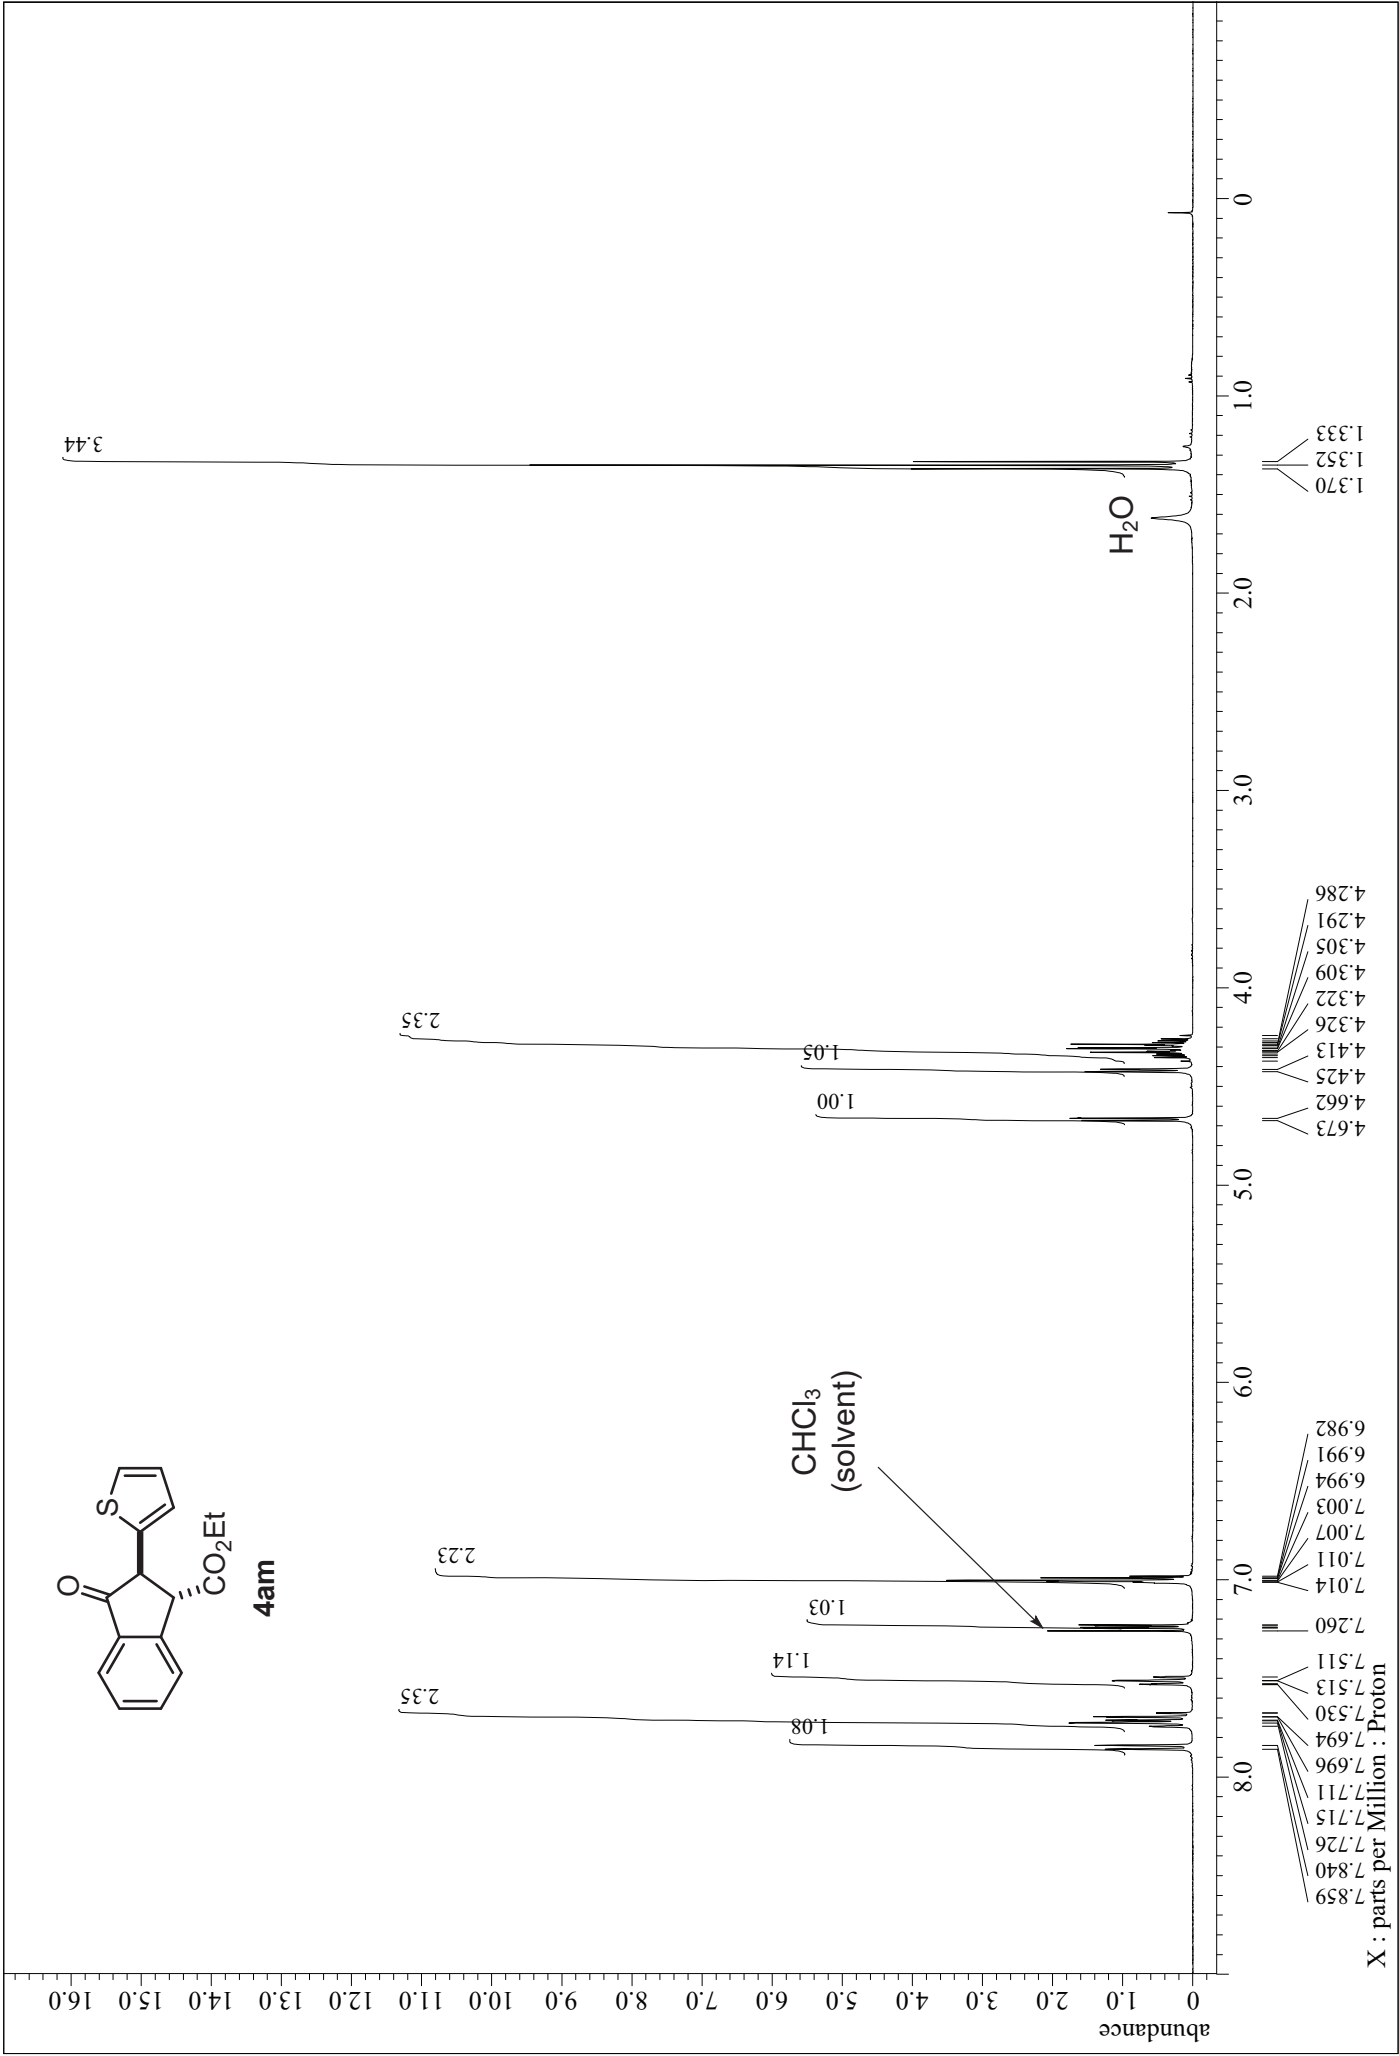

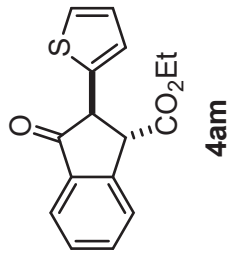

CHCl<sub>3</sub>  
(solvent)

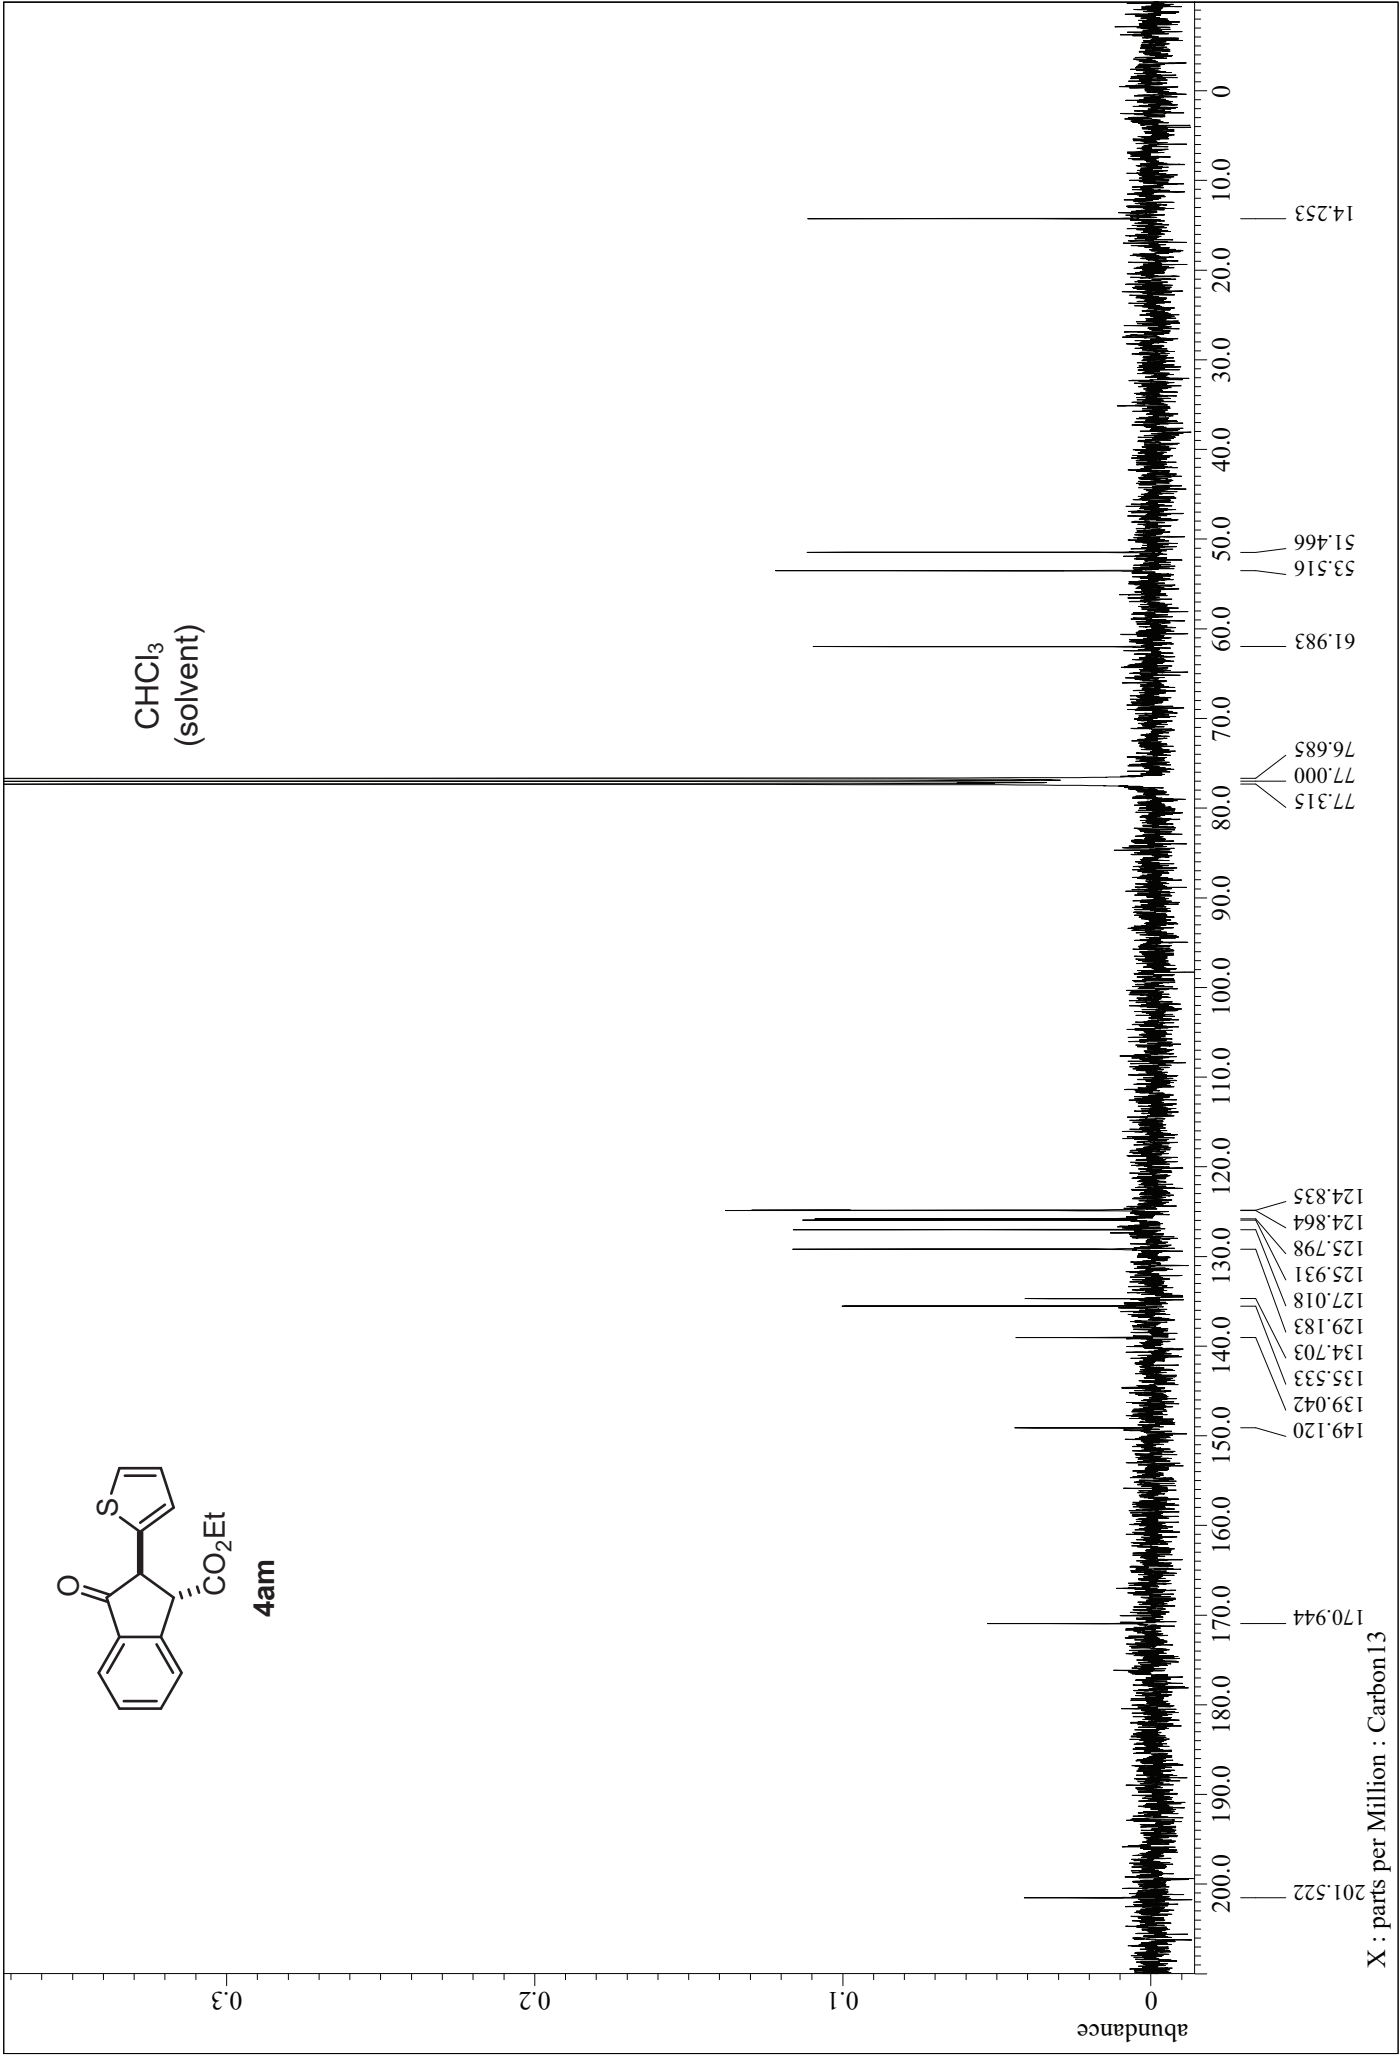



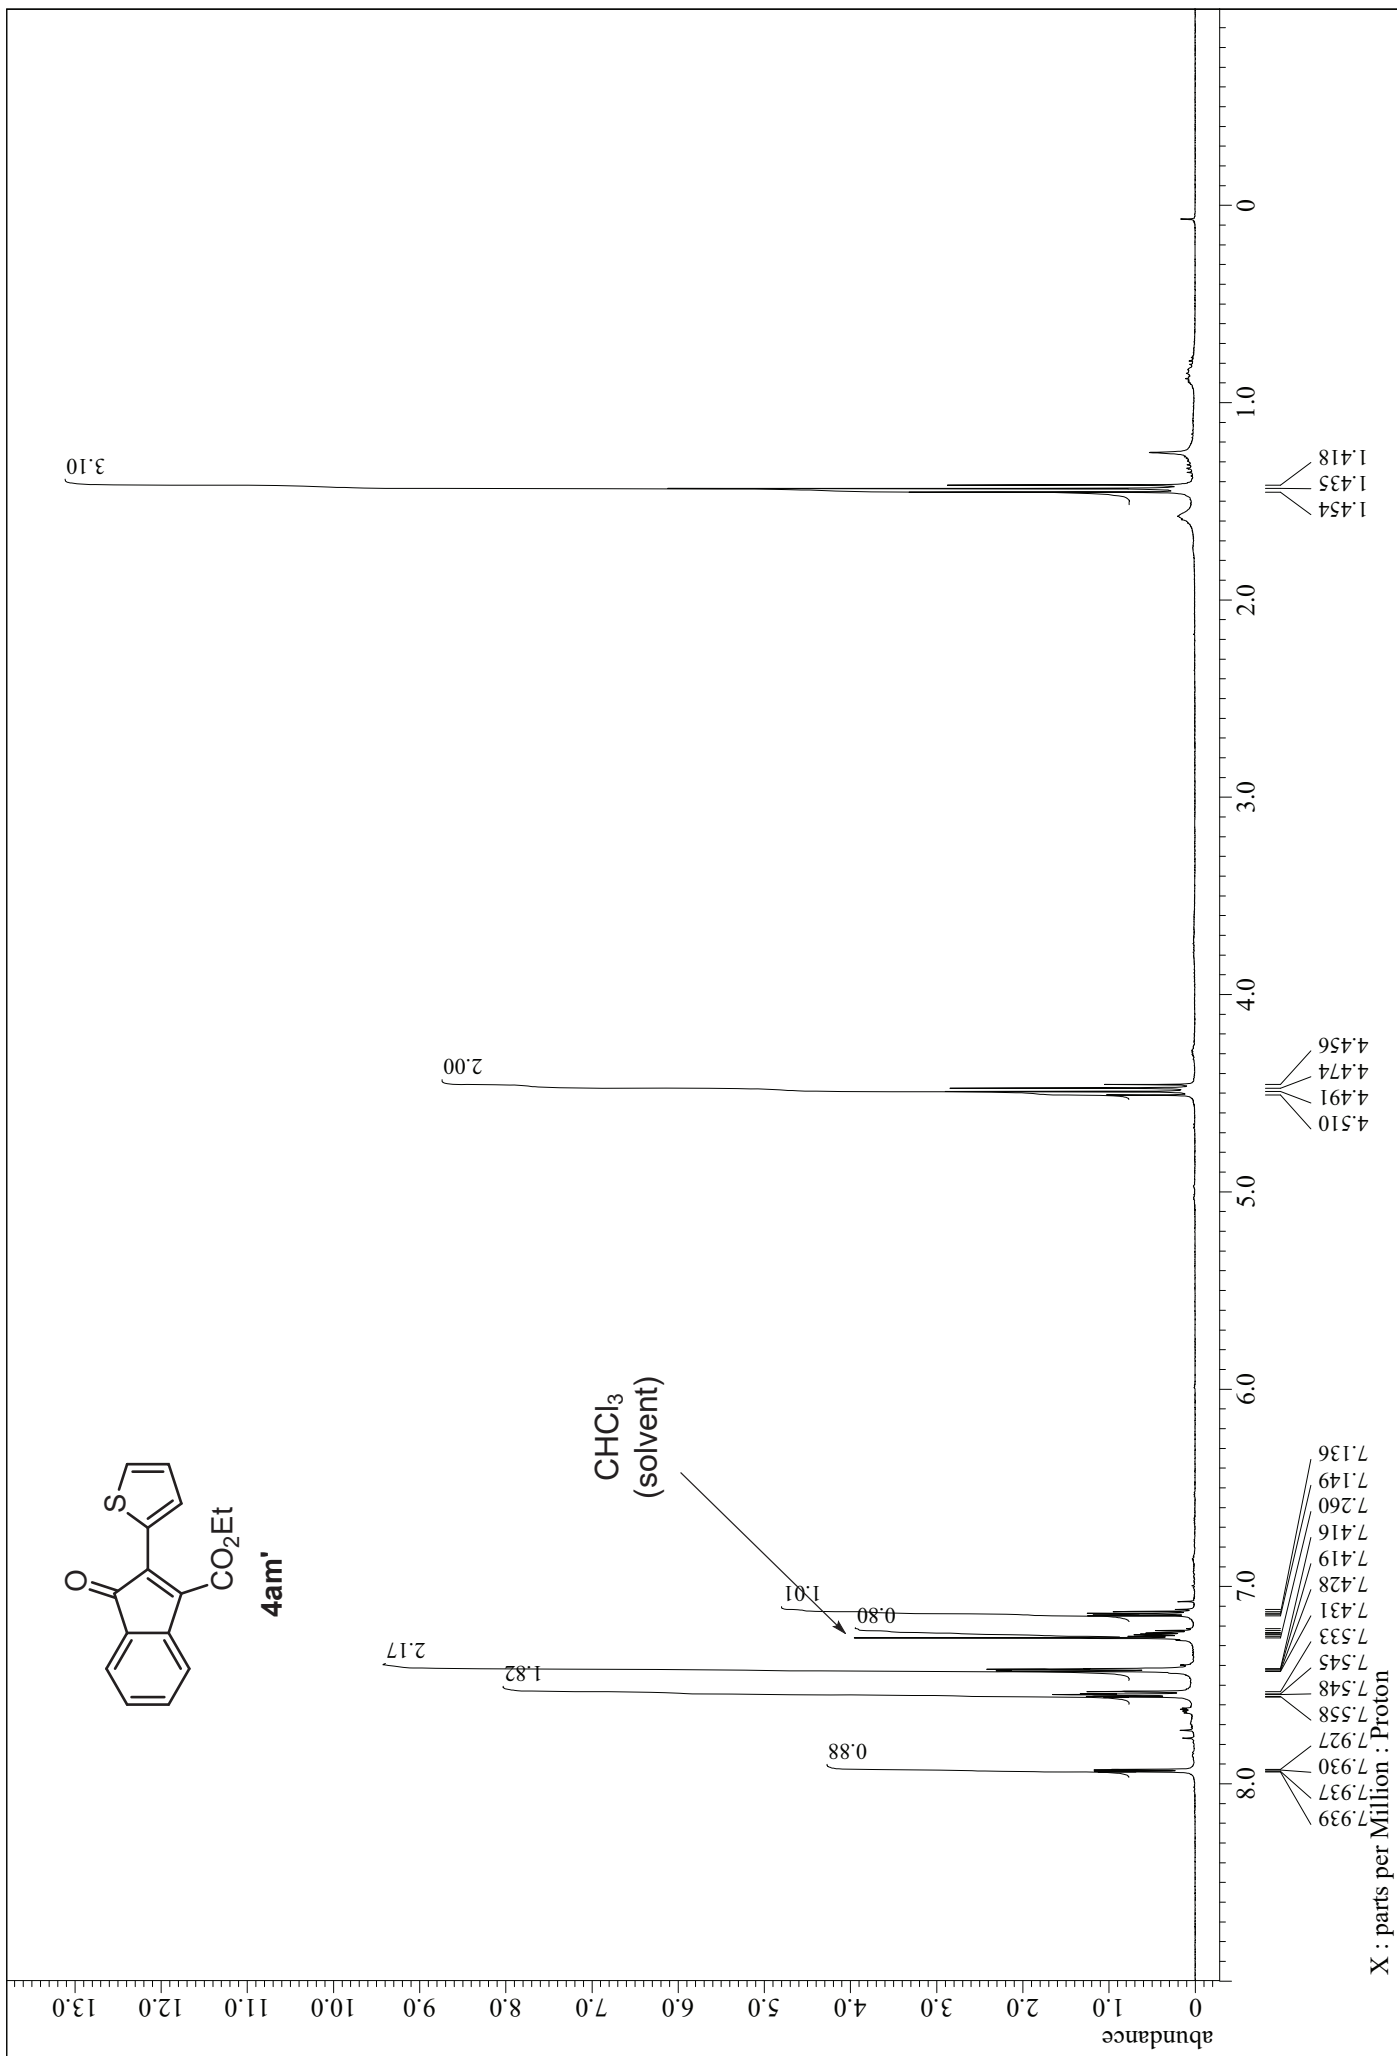

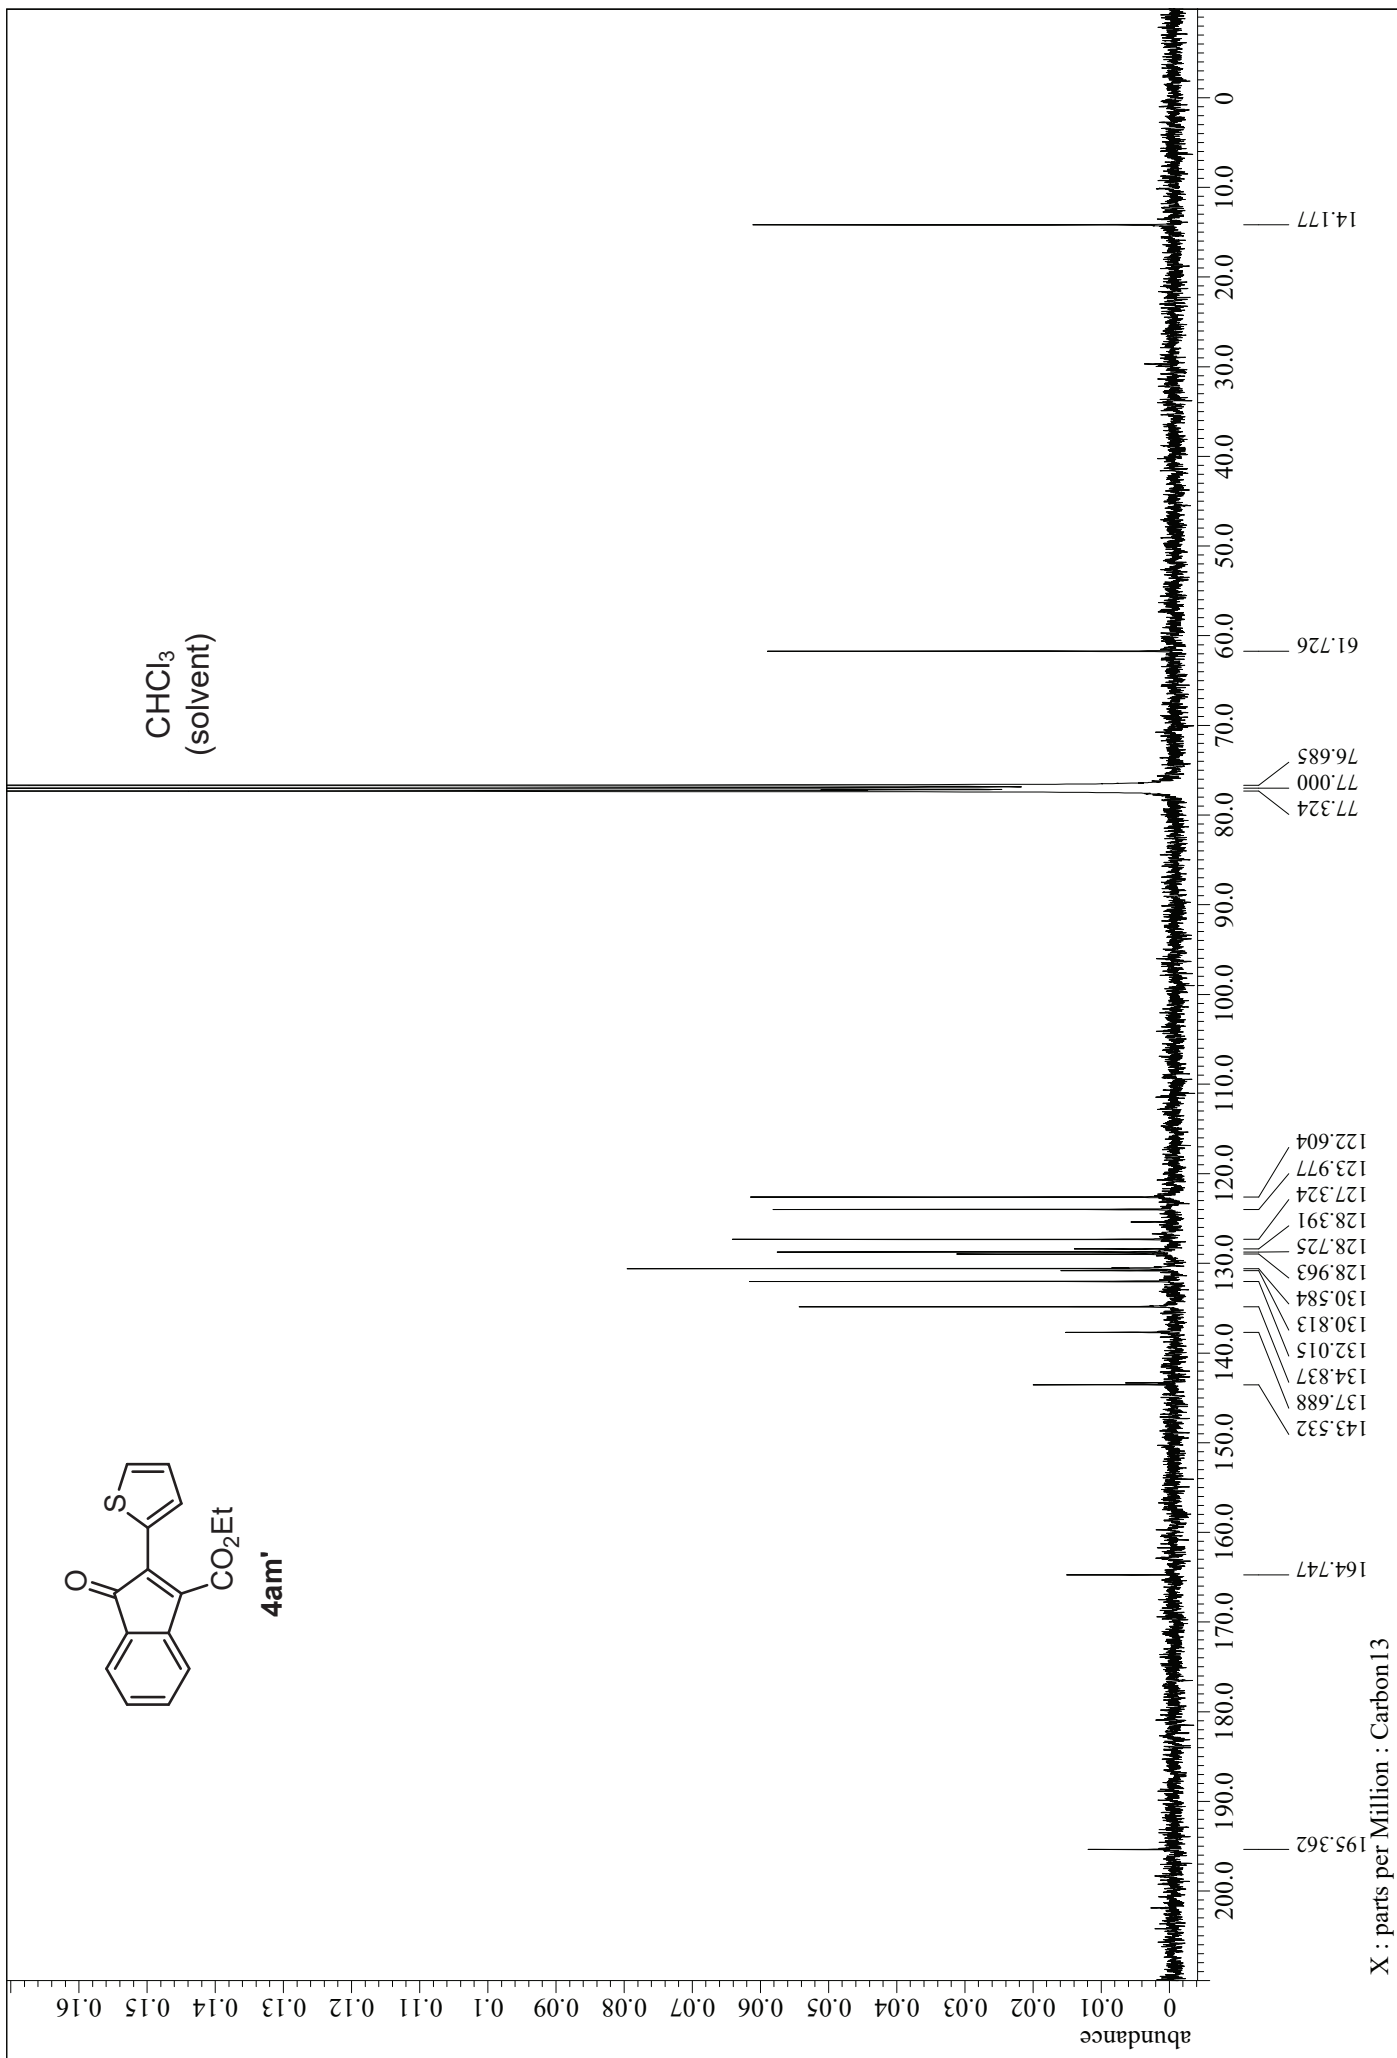



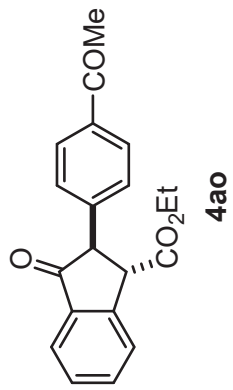

CHCl<sub>3</sub>  
(solvent)

abundance

0.9

0.8

0.7

0.6

0.5

0.4

0.3

0.2

0.1

0

0

10.0

20.0

30.0

40.0

50.0

60.0

70.0

80.0

90.0

100.0

110.0

120.0

130.0

140.0

150.0

160.0

170.0

180.0

190.0

200.0

14.205

26.572

52.887

56.348

61.954

76.676

77.000

77.315

124.692

126.103

128.544

128.944

129.259

135.266

135.552

136.210

143.370

149.587

170.897

197.565

202.723

X : parts per Million : Carbon13

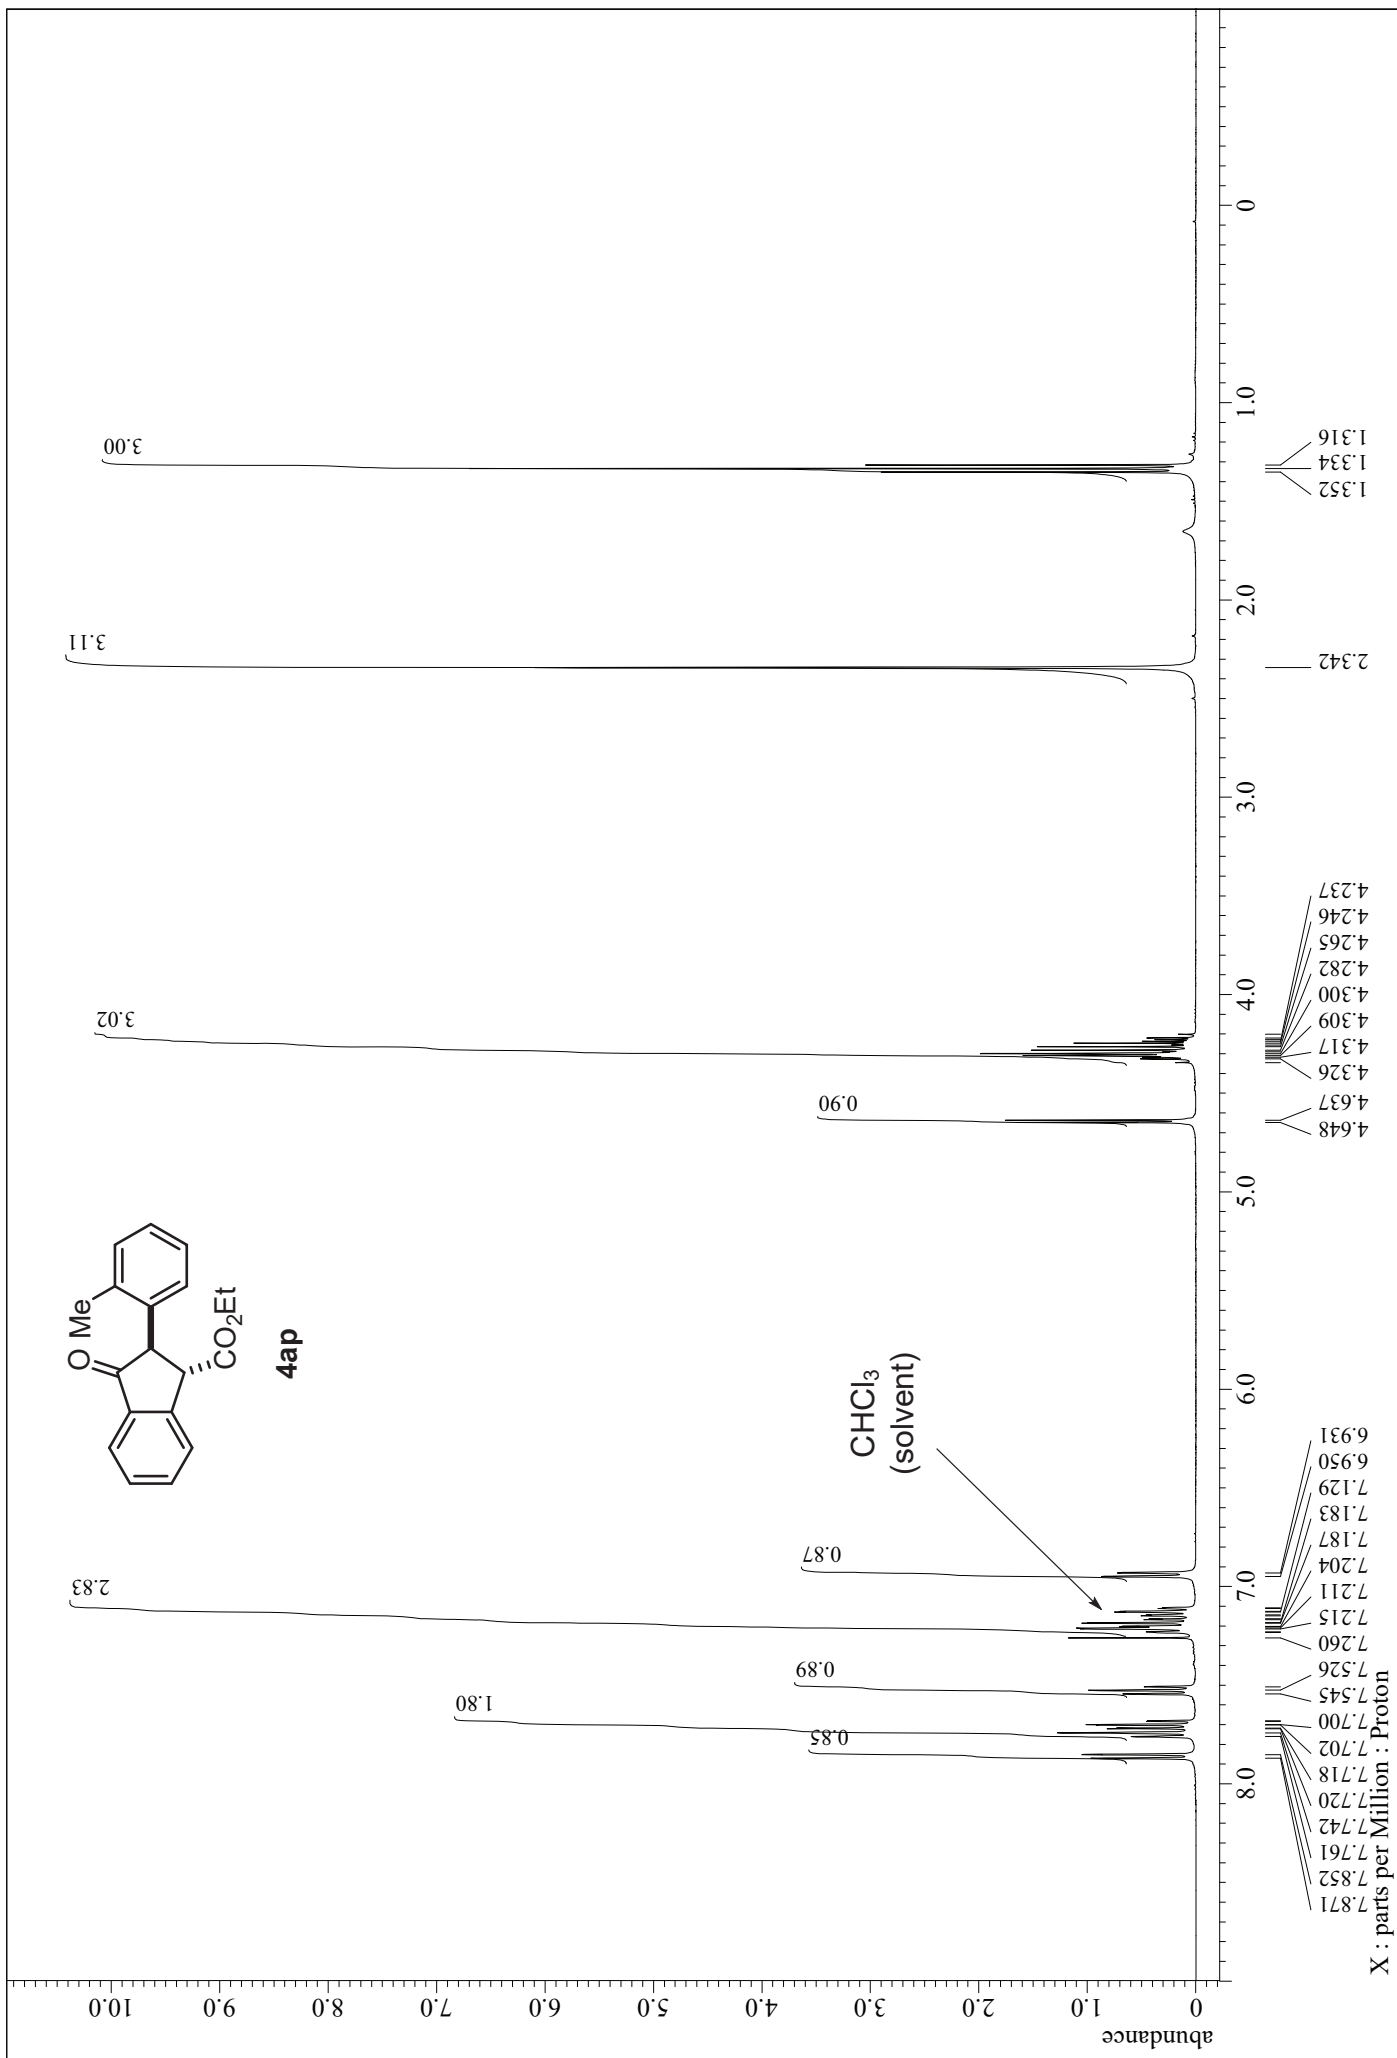

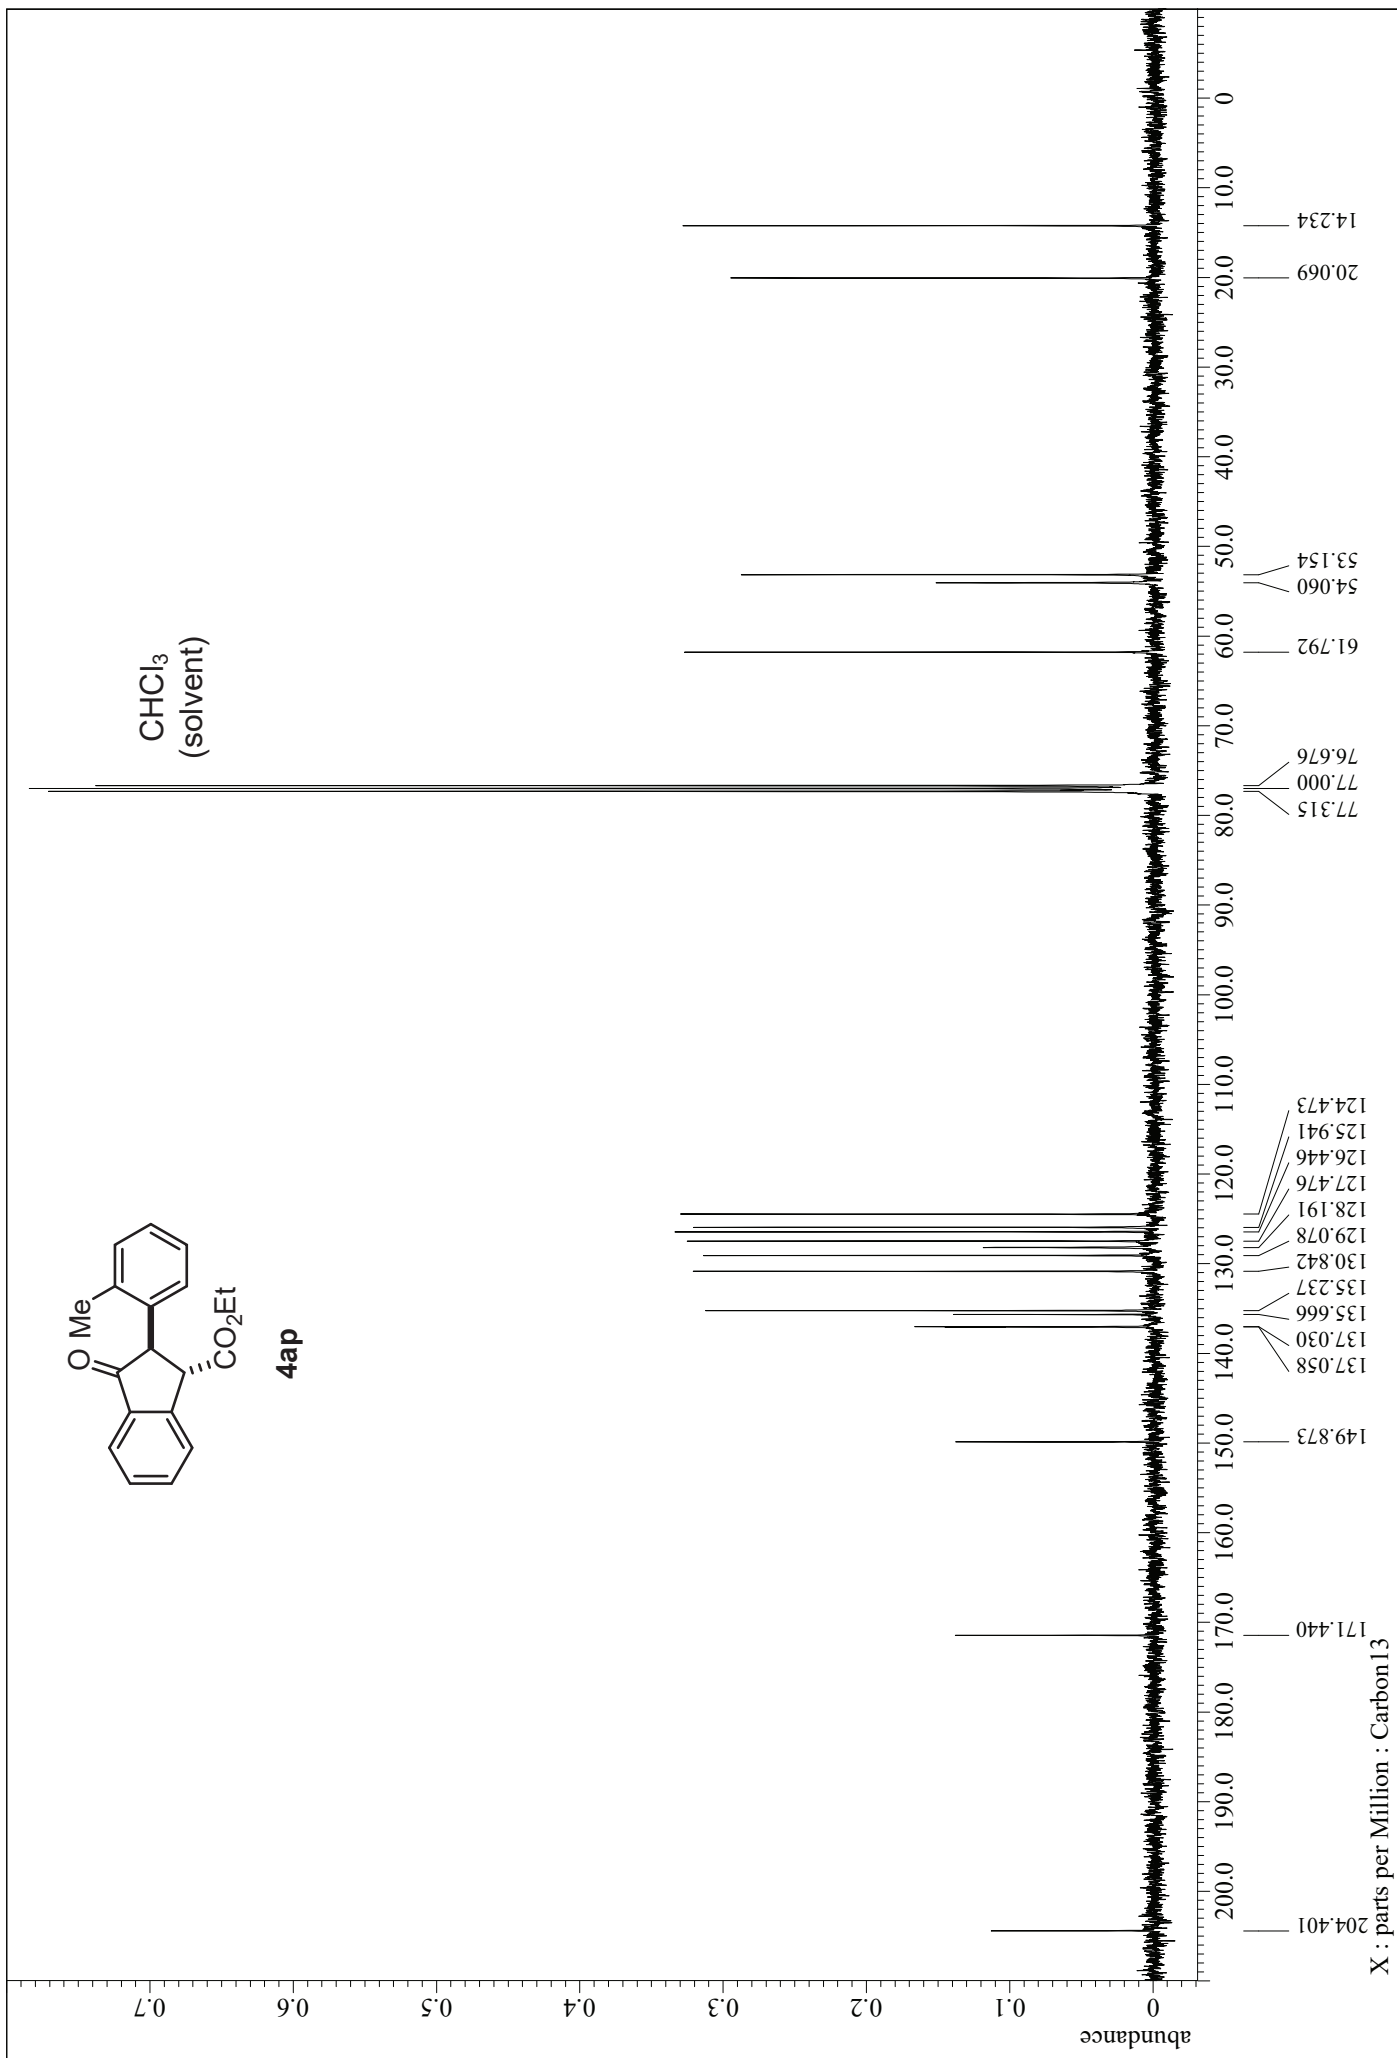

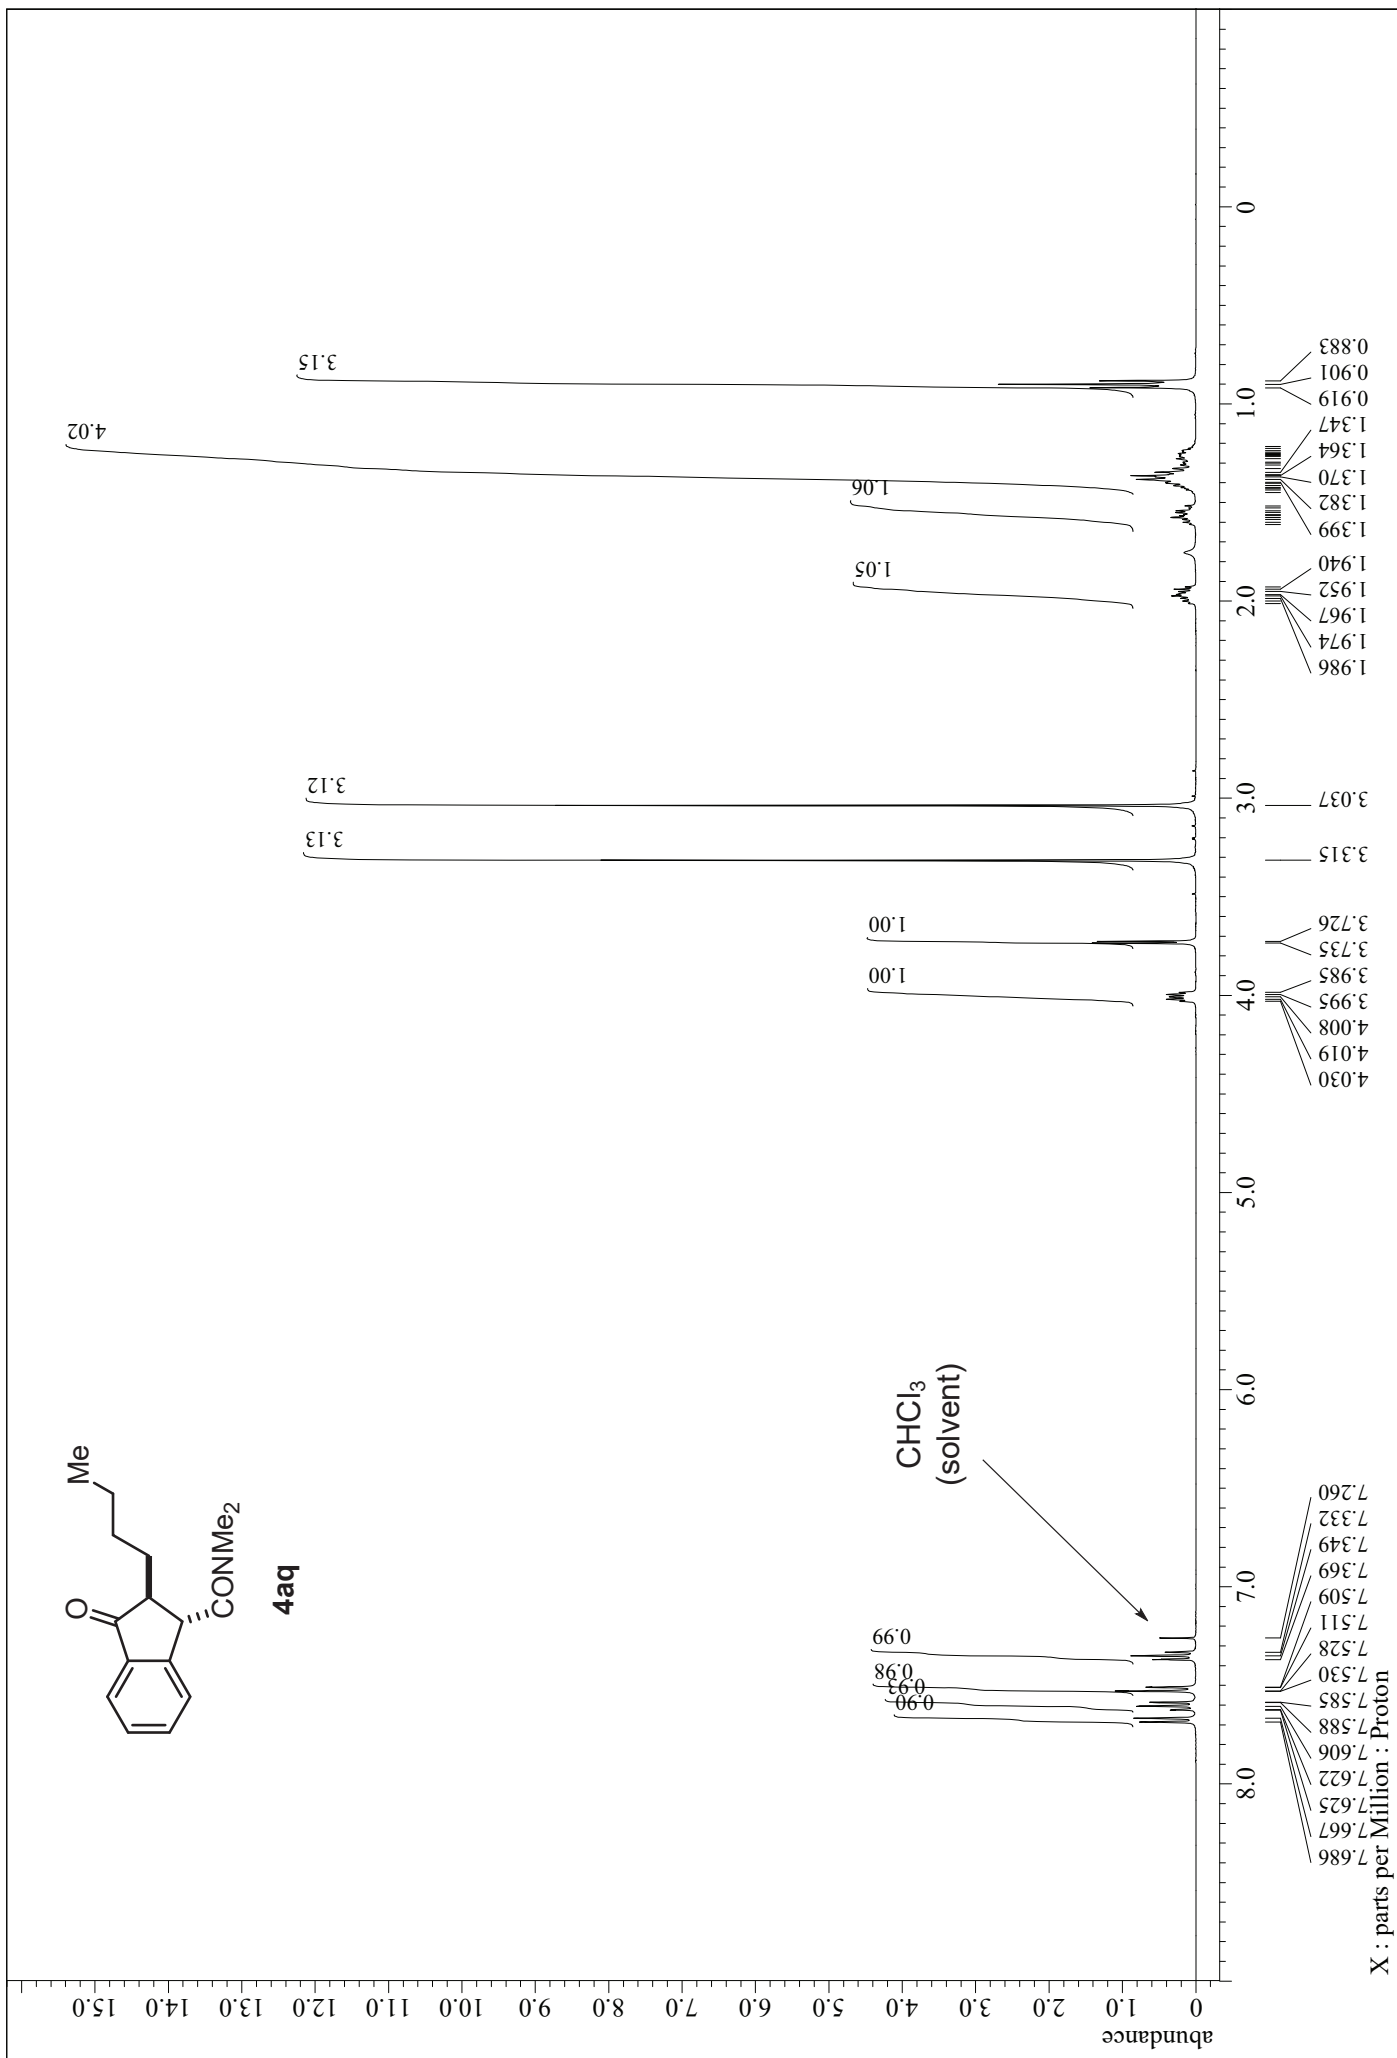

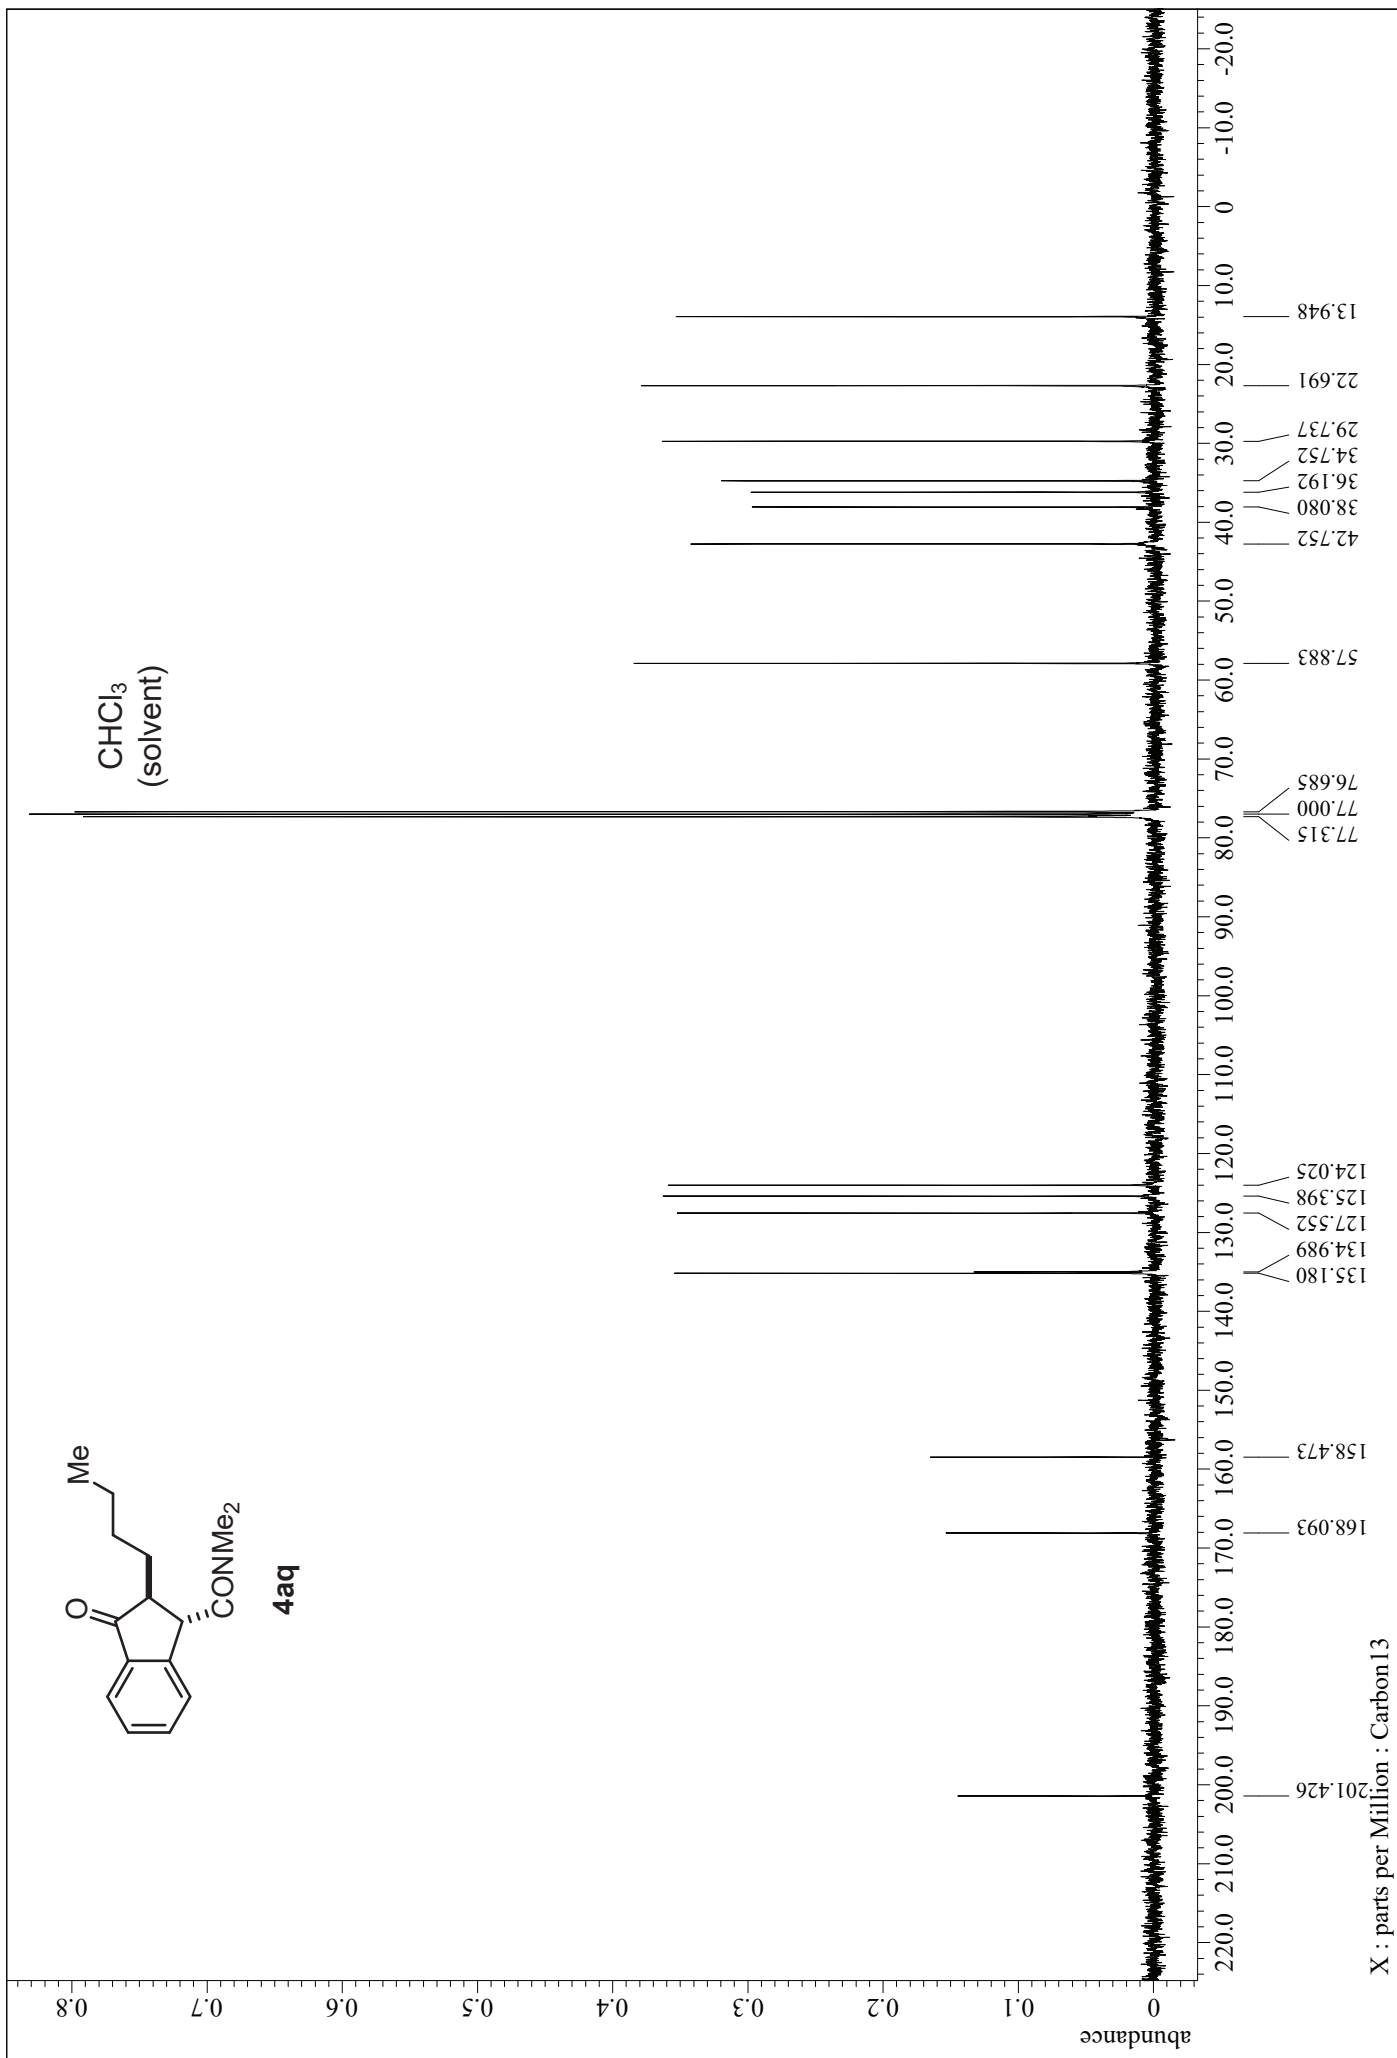



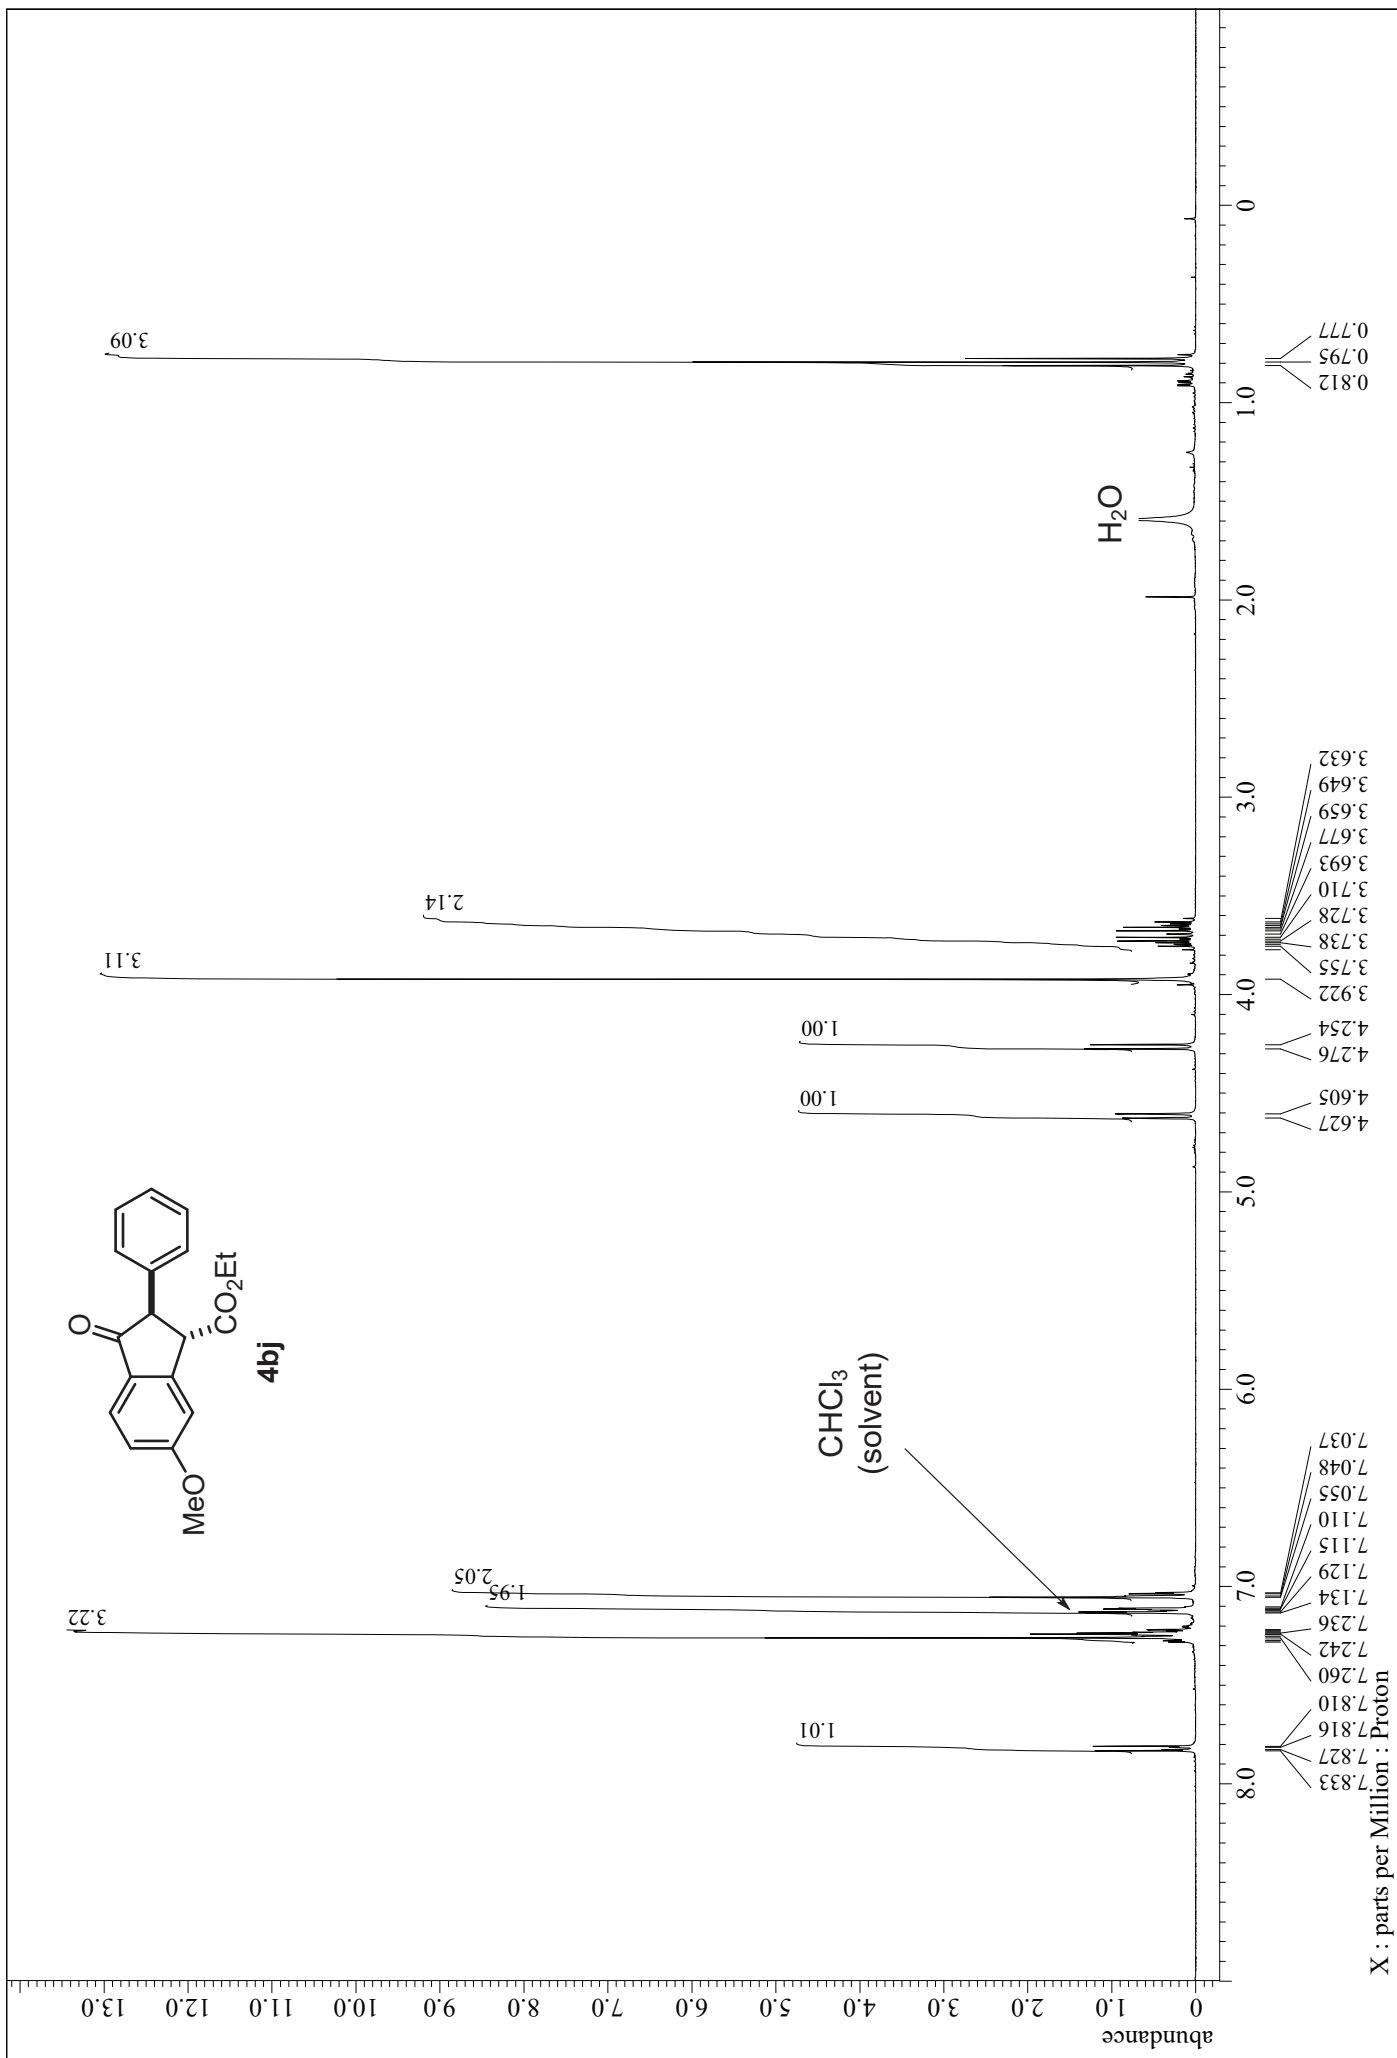

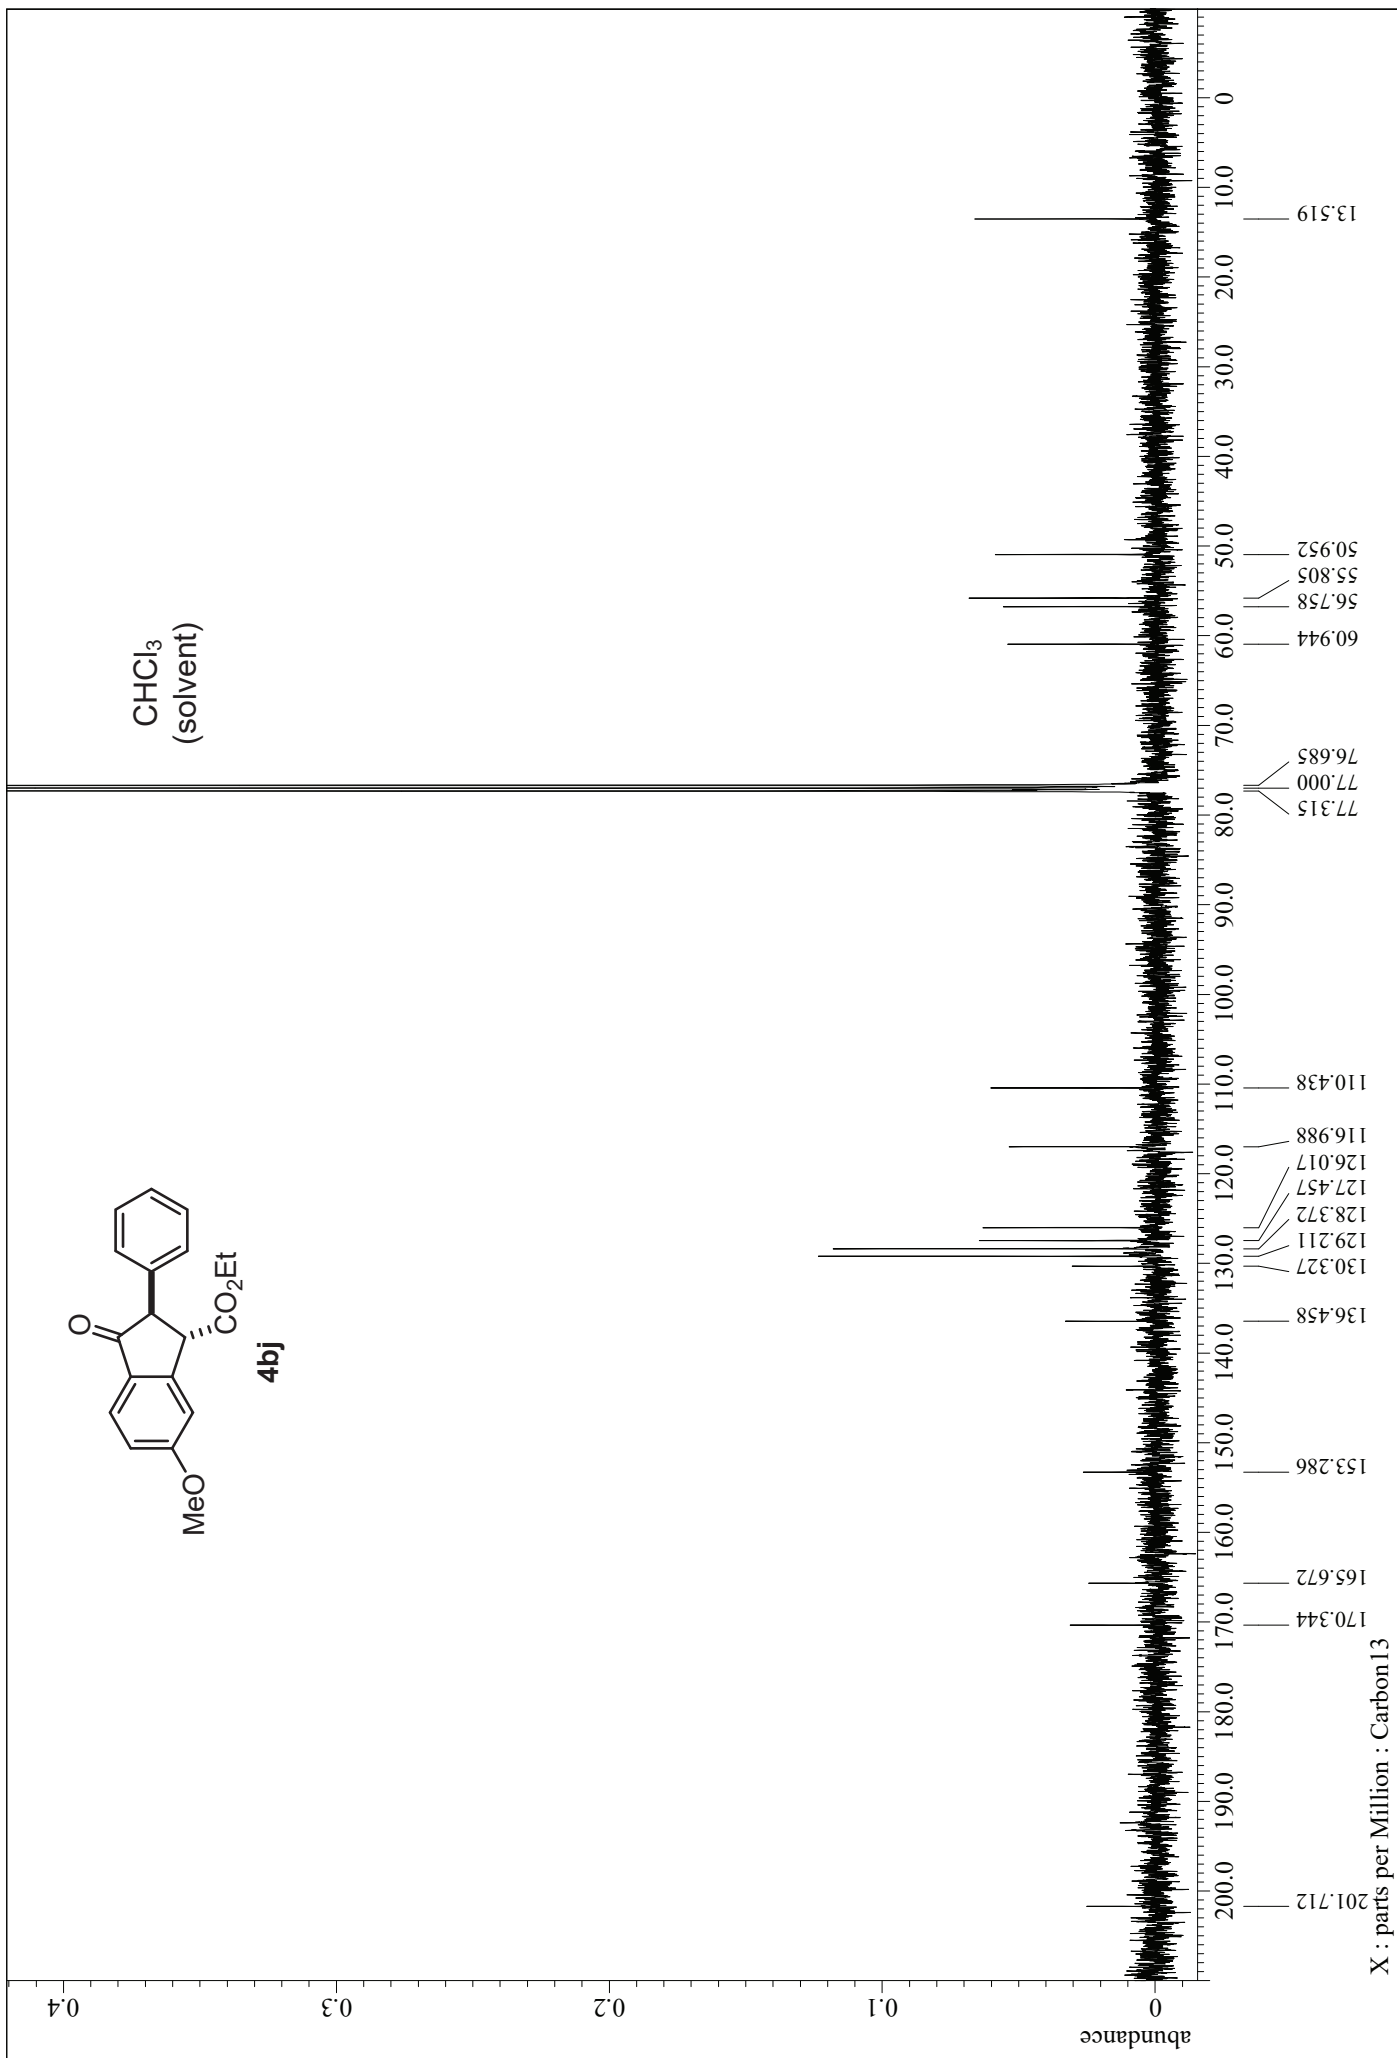

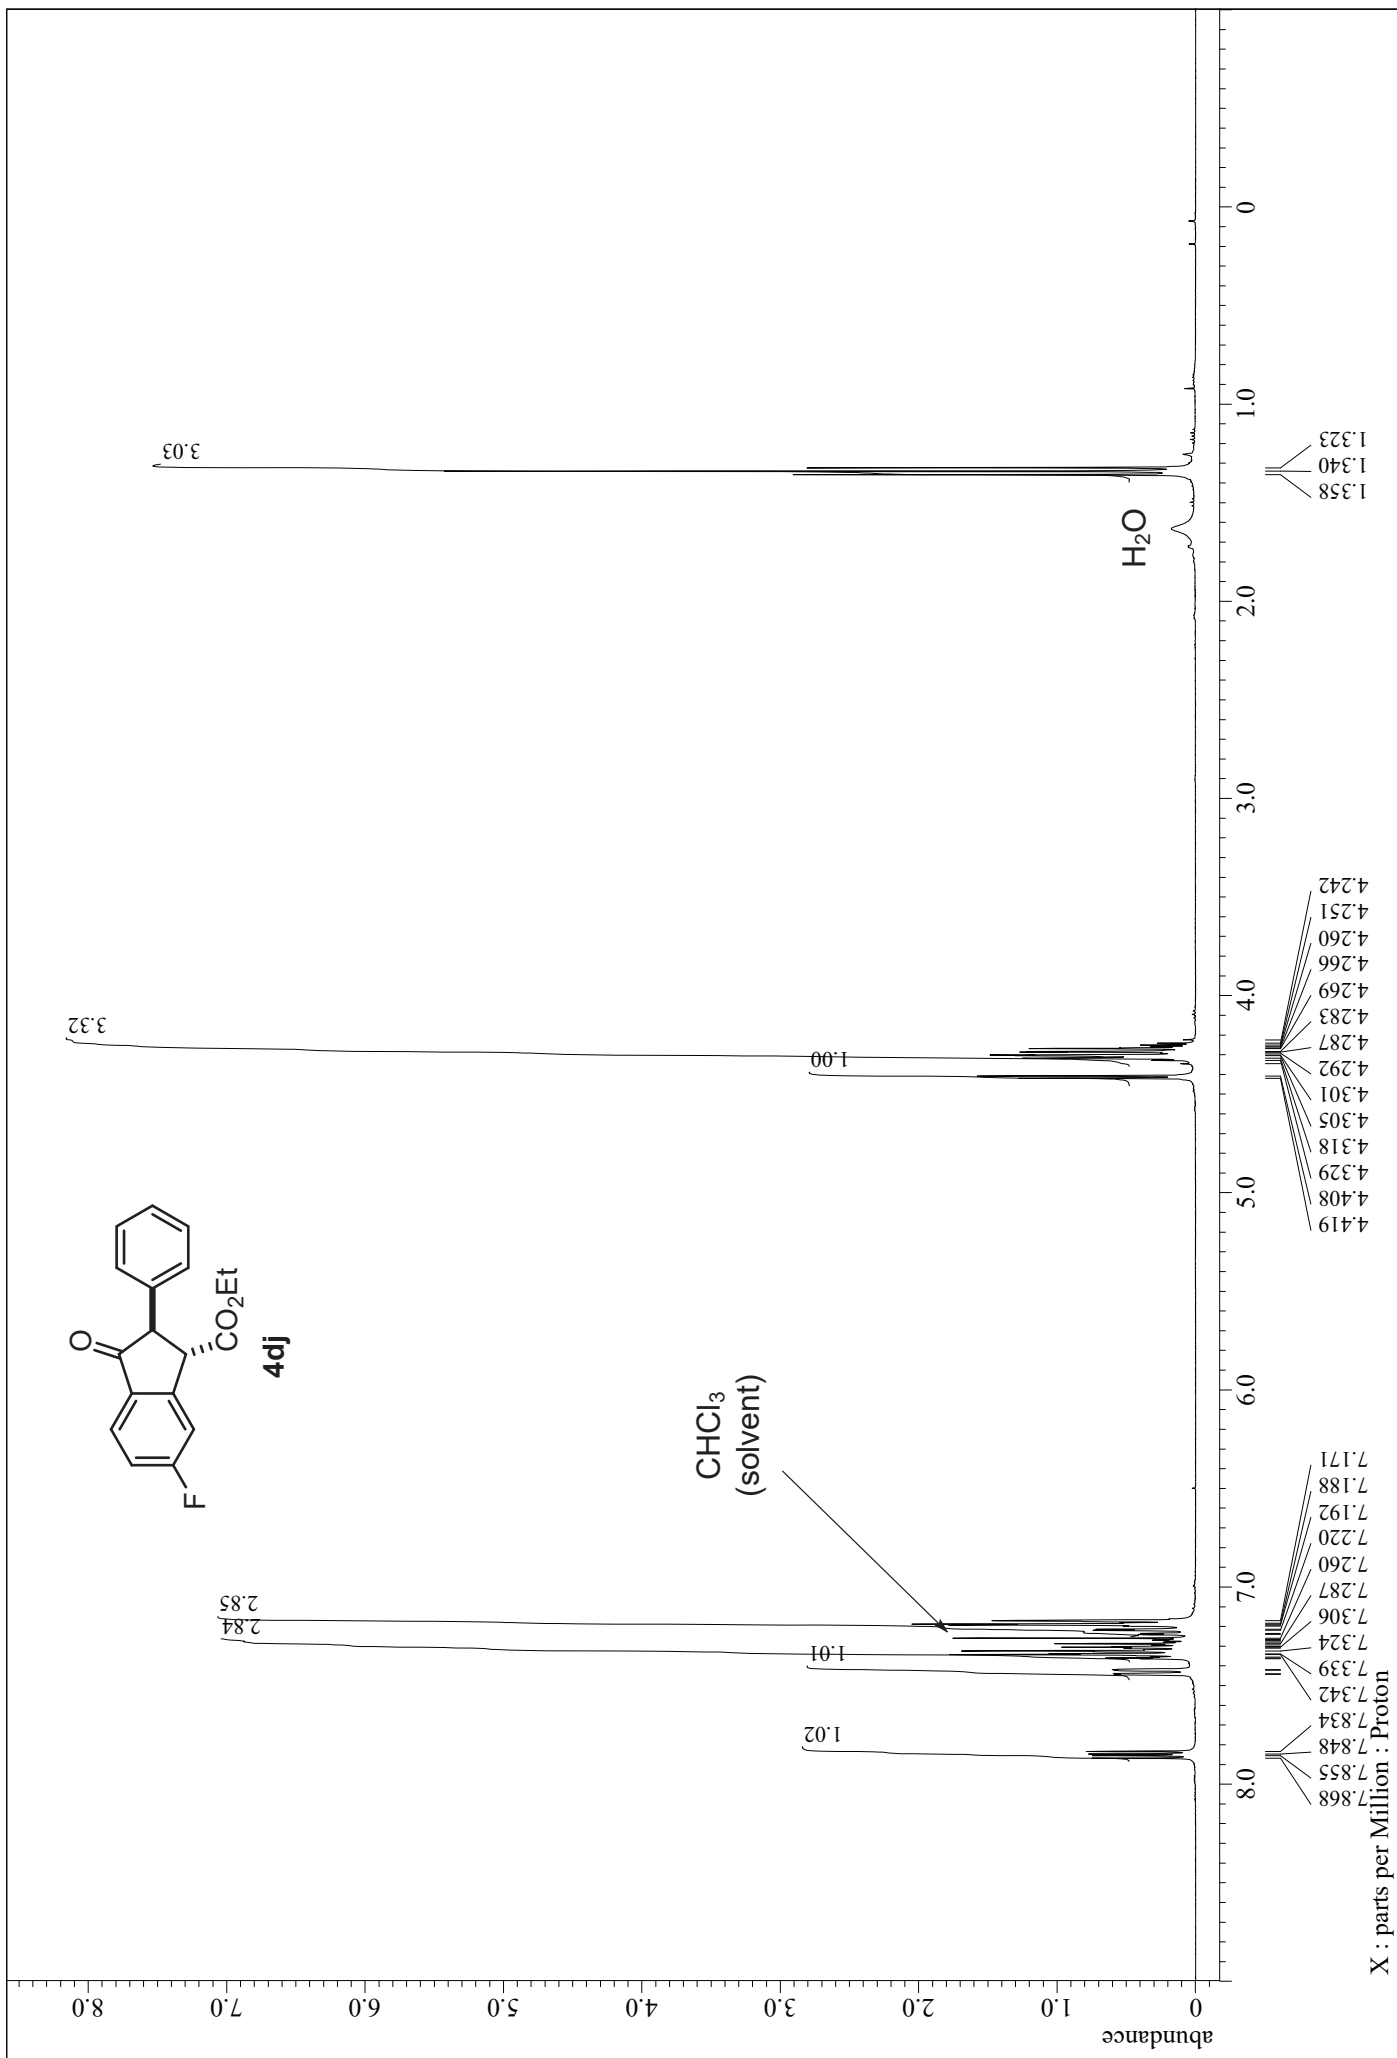

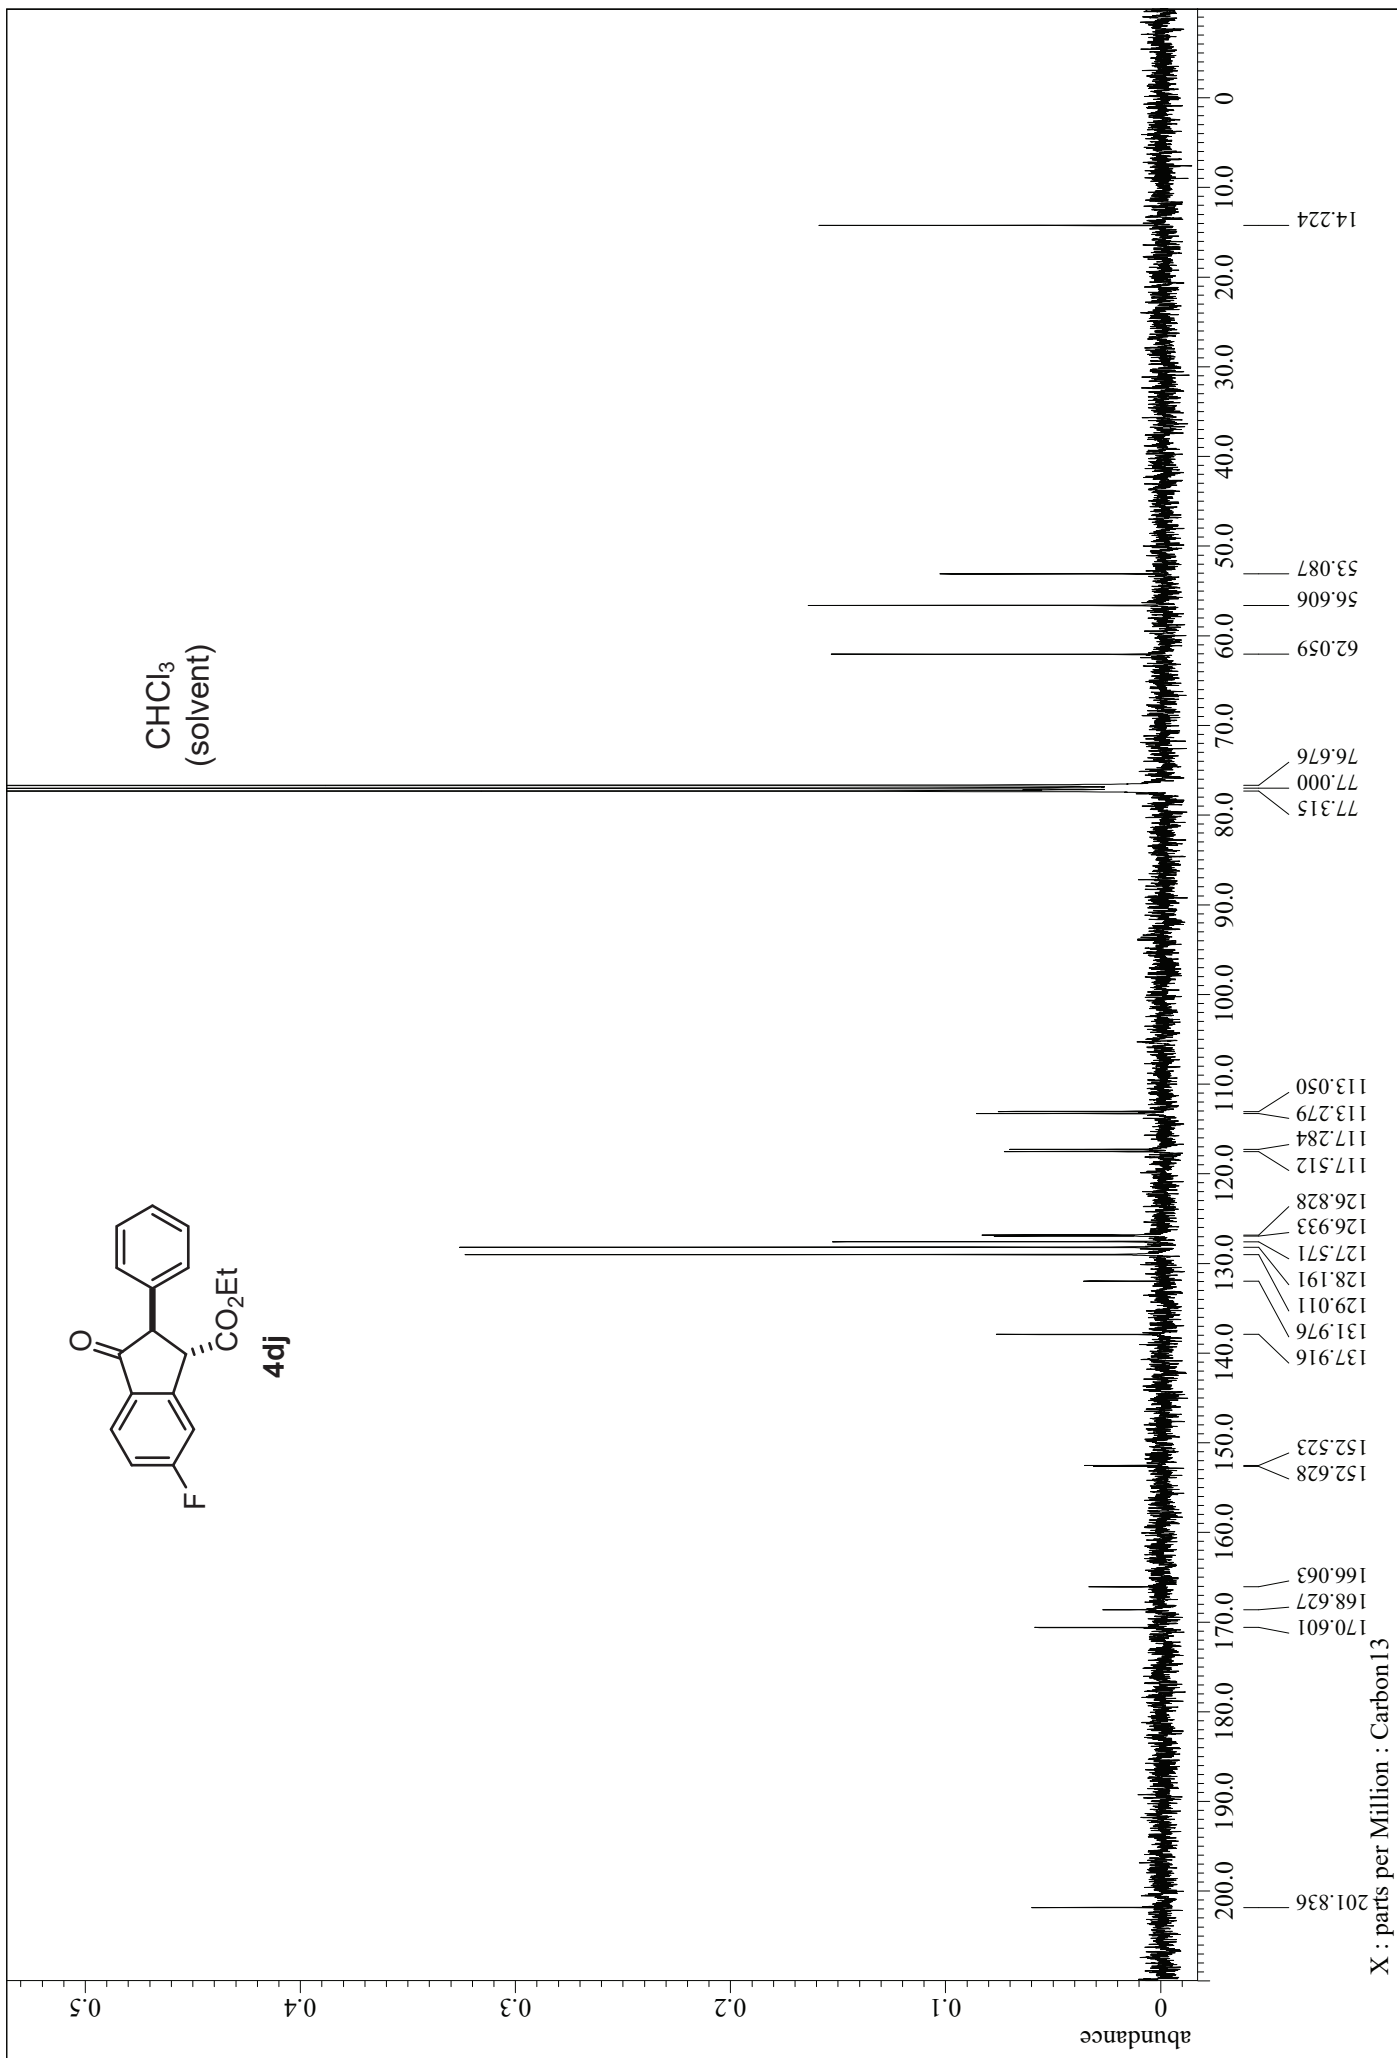

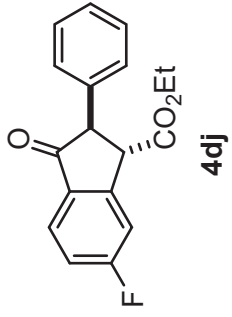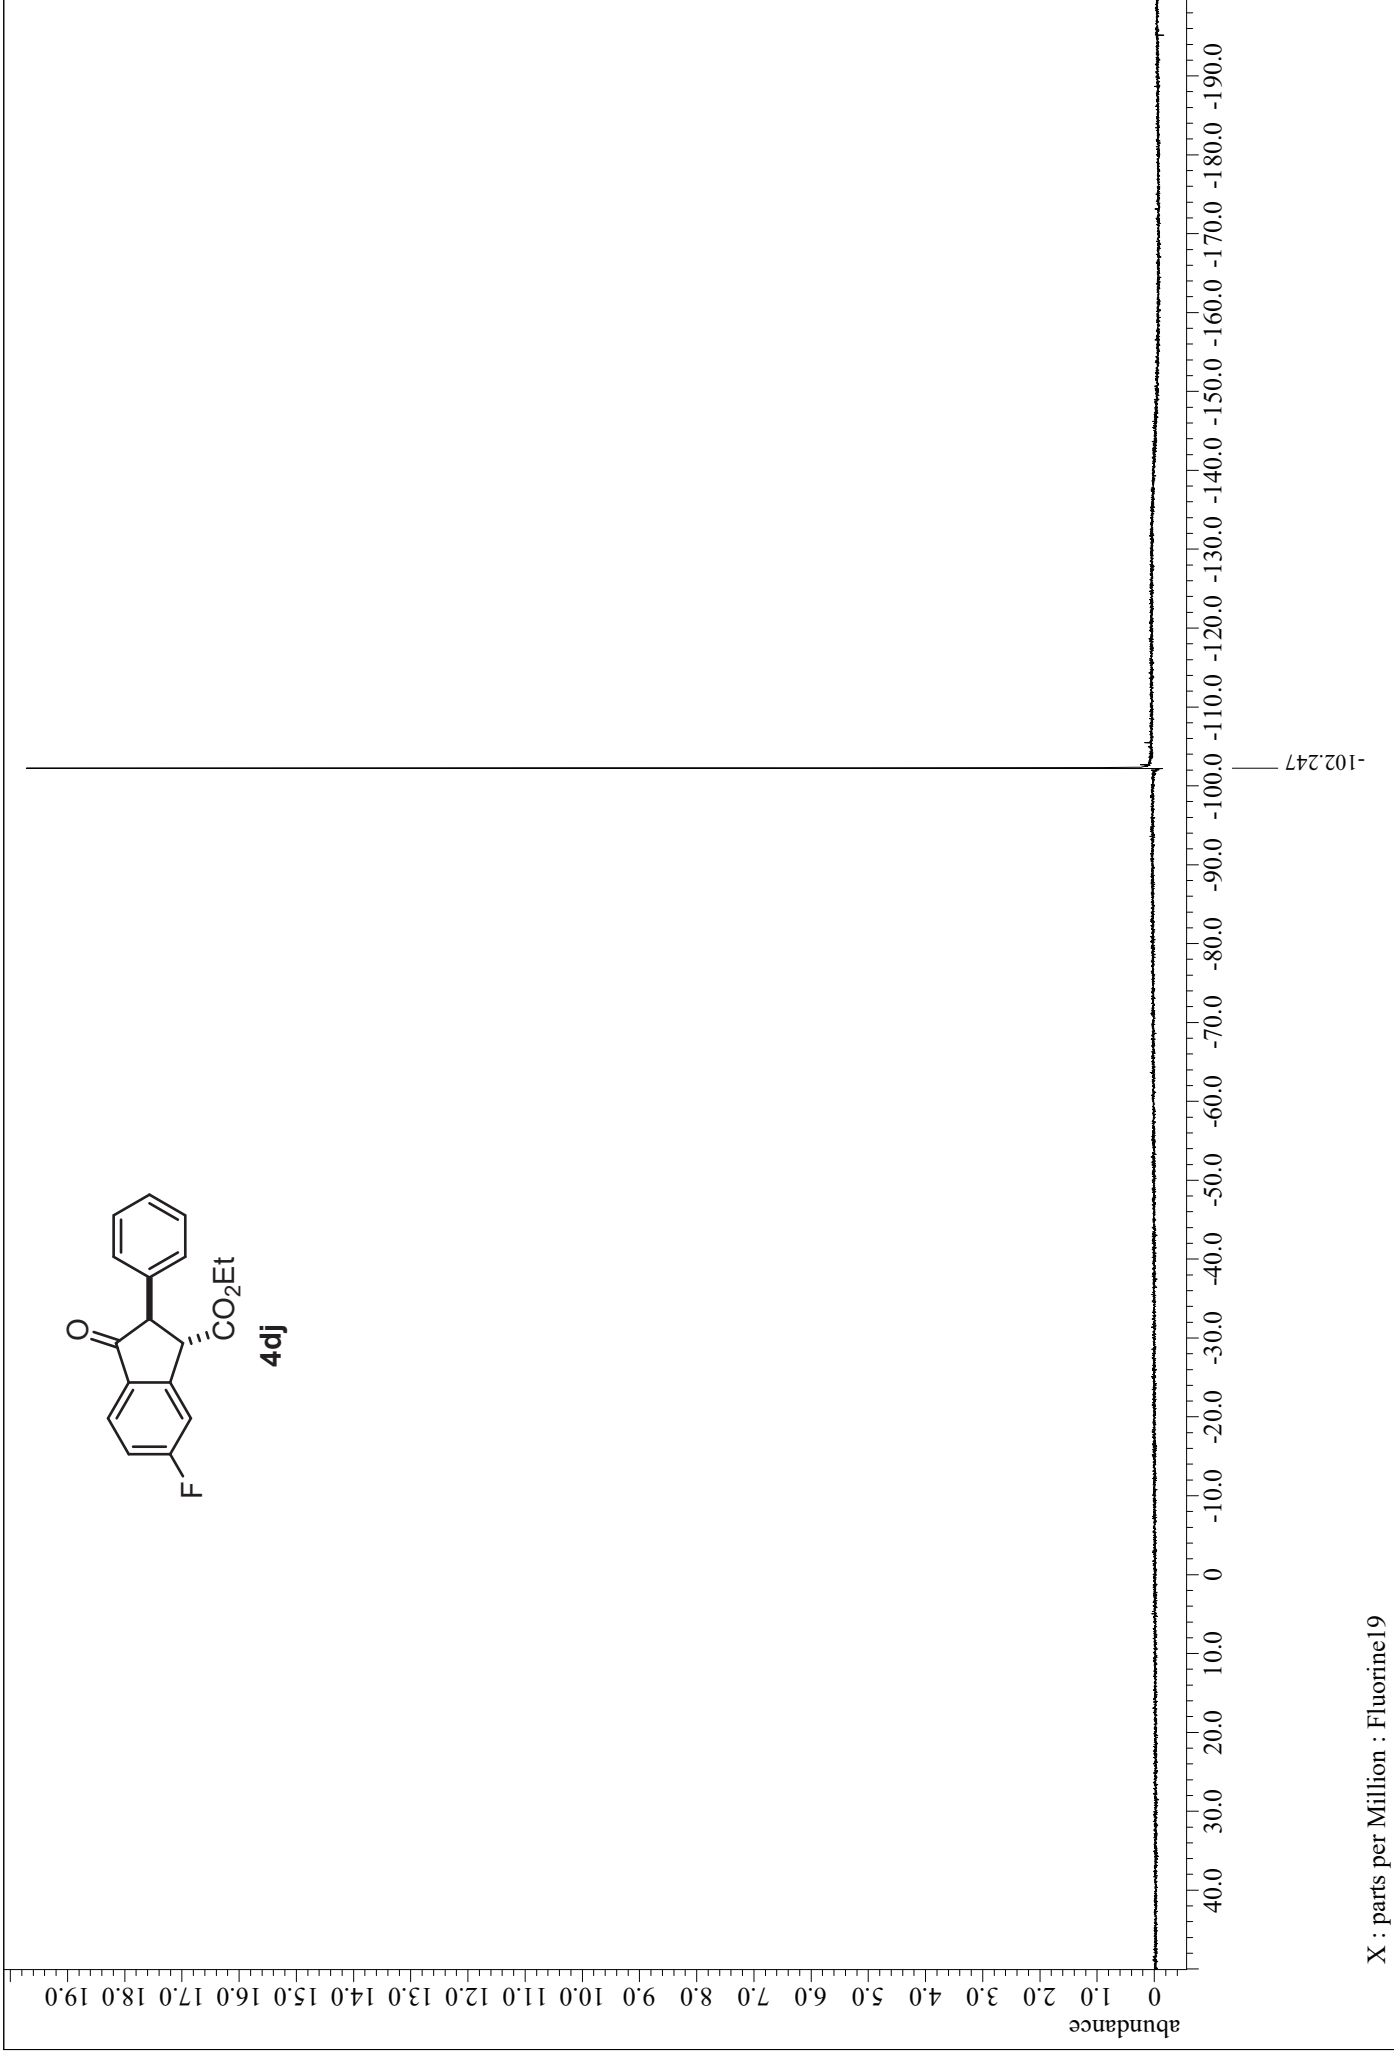

X : parts per Million : Fluorine19

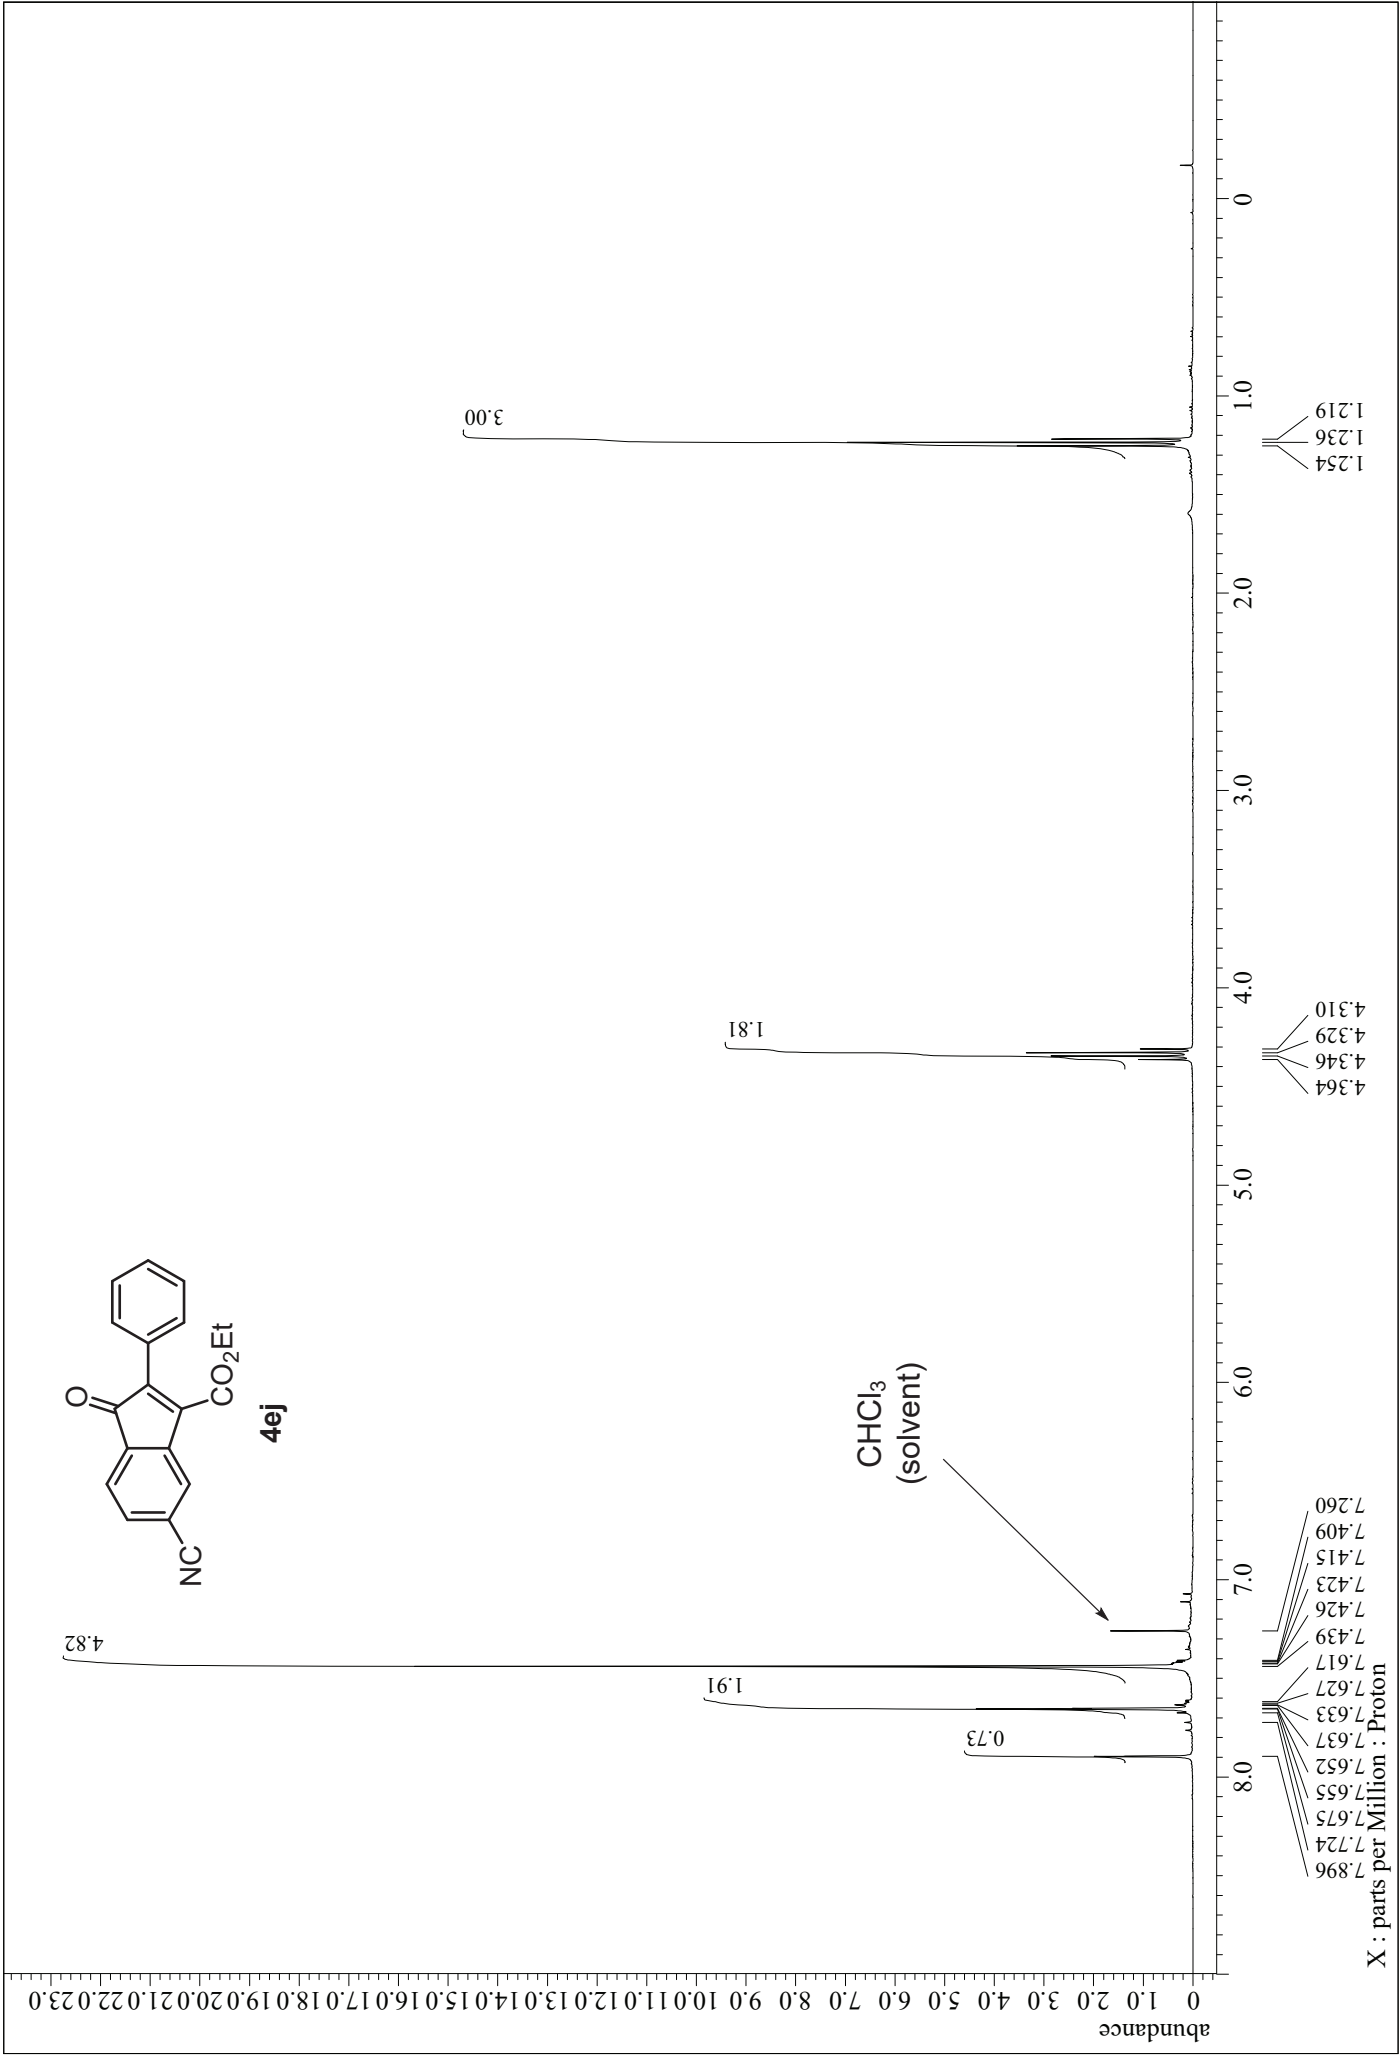

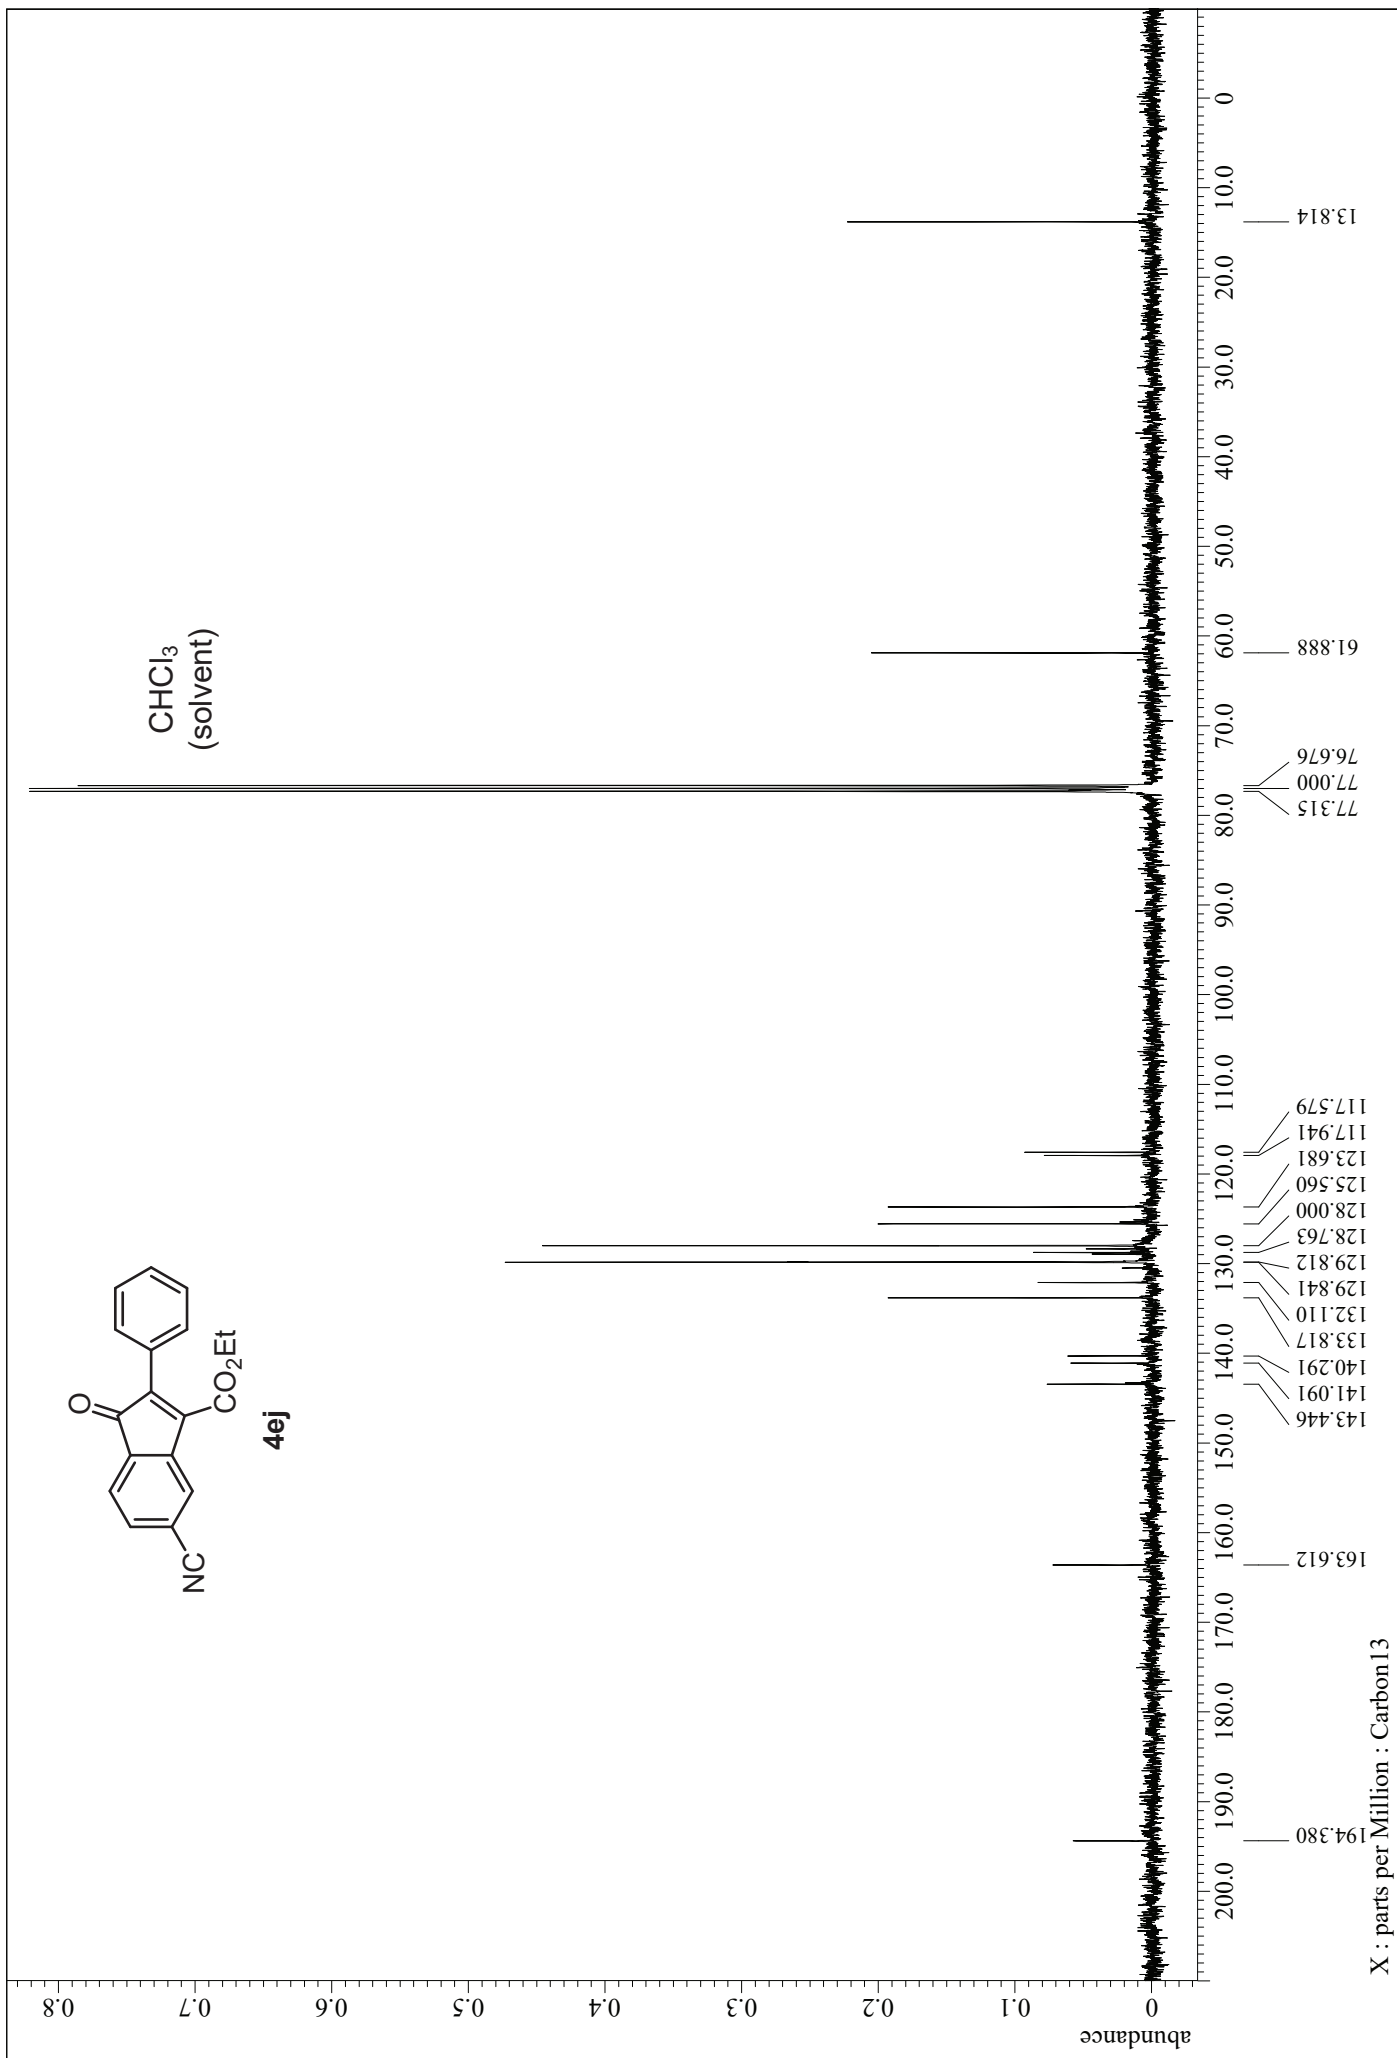

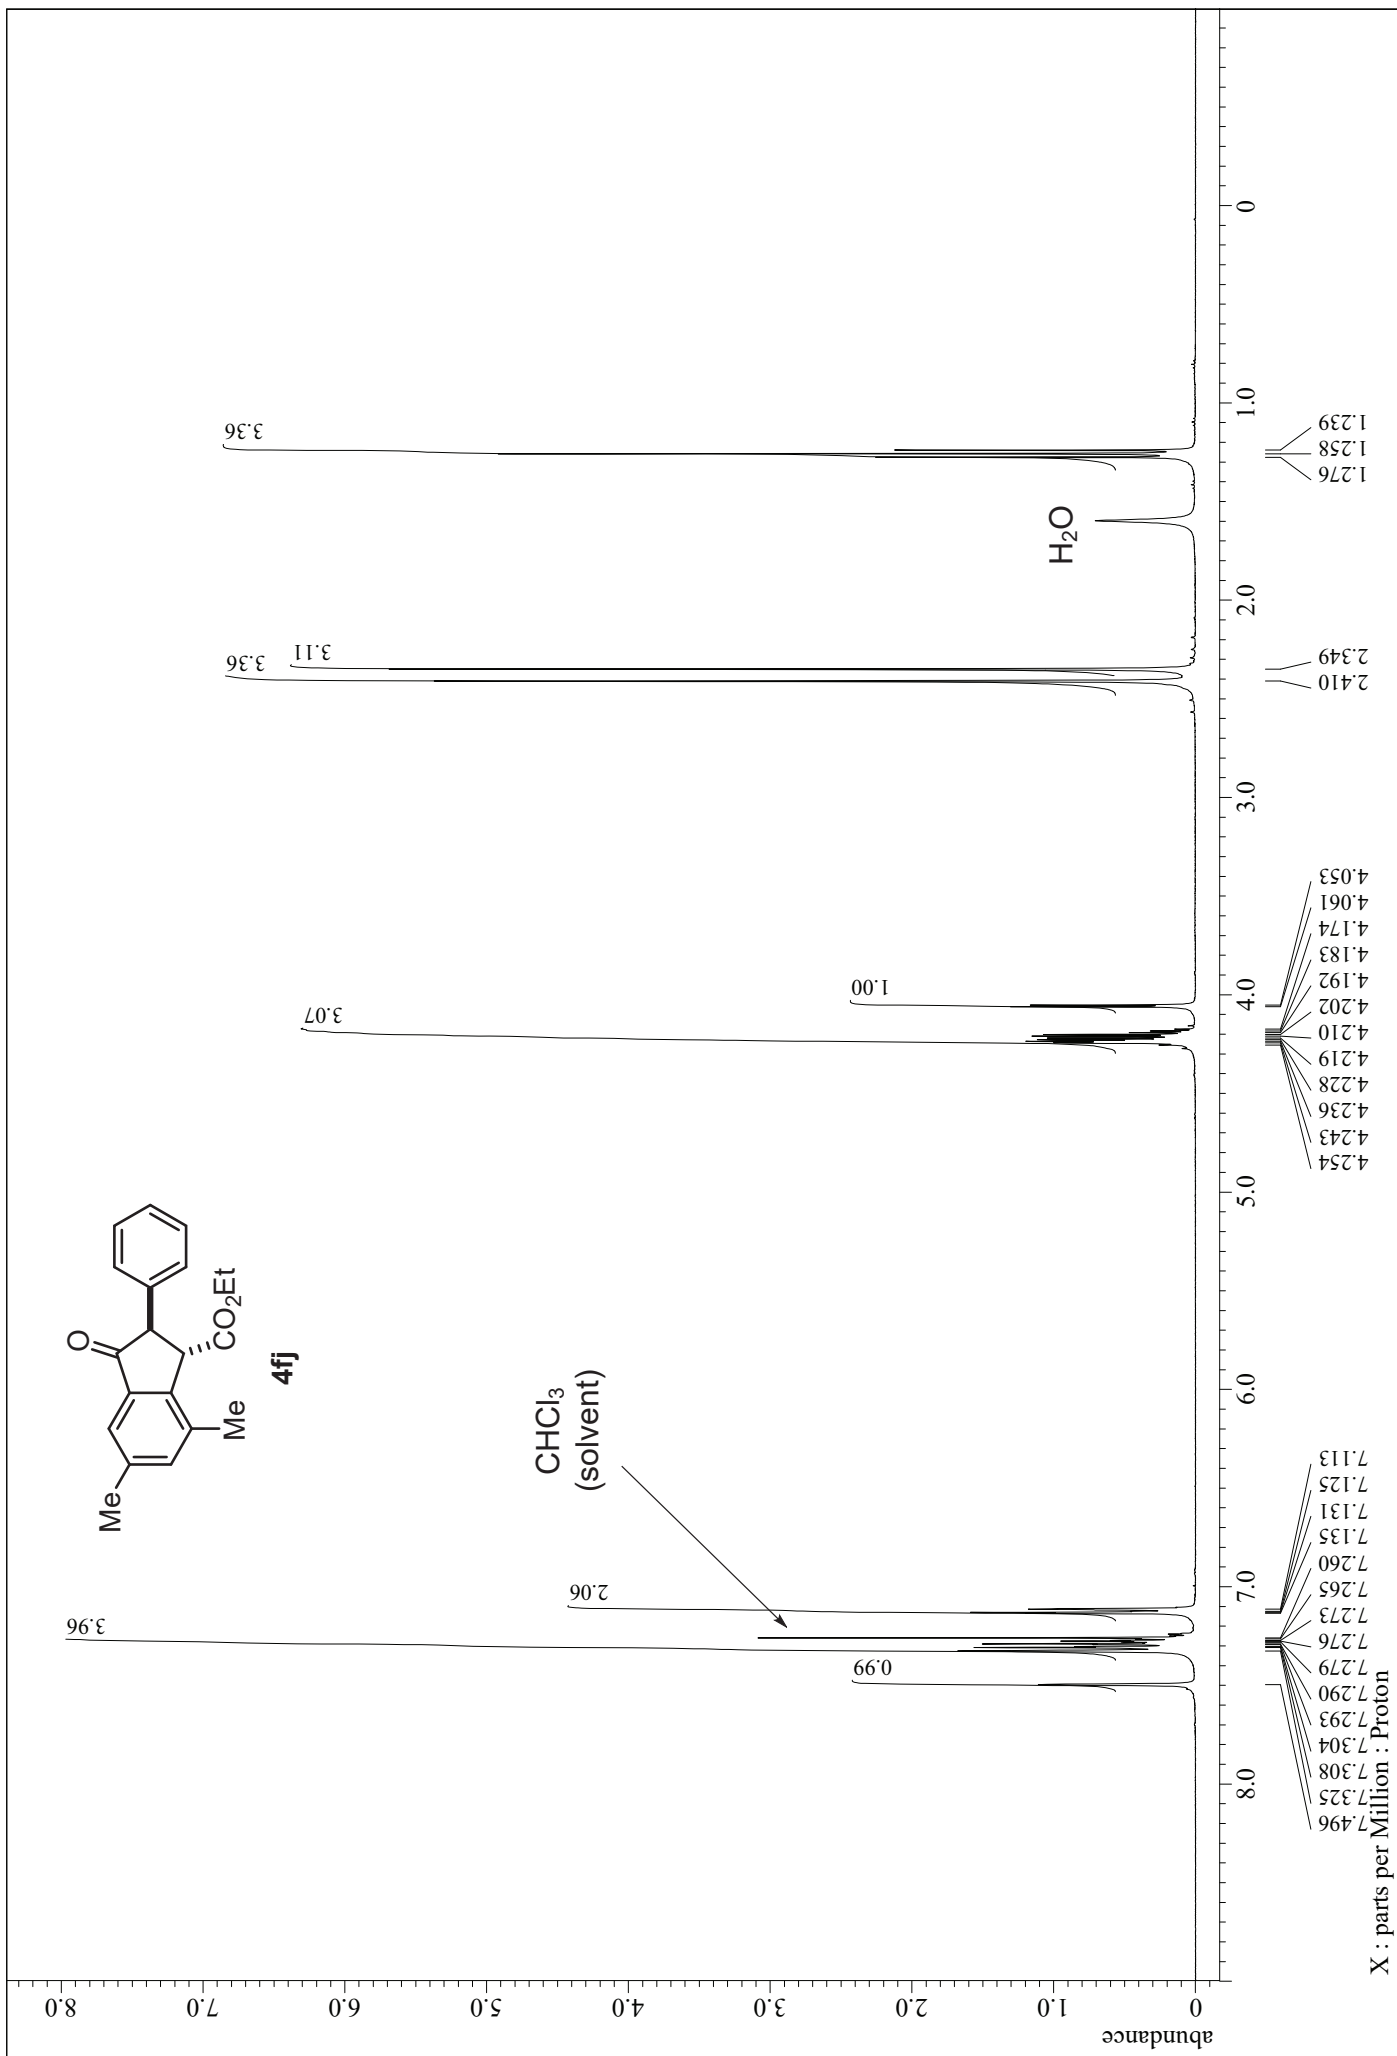



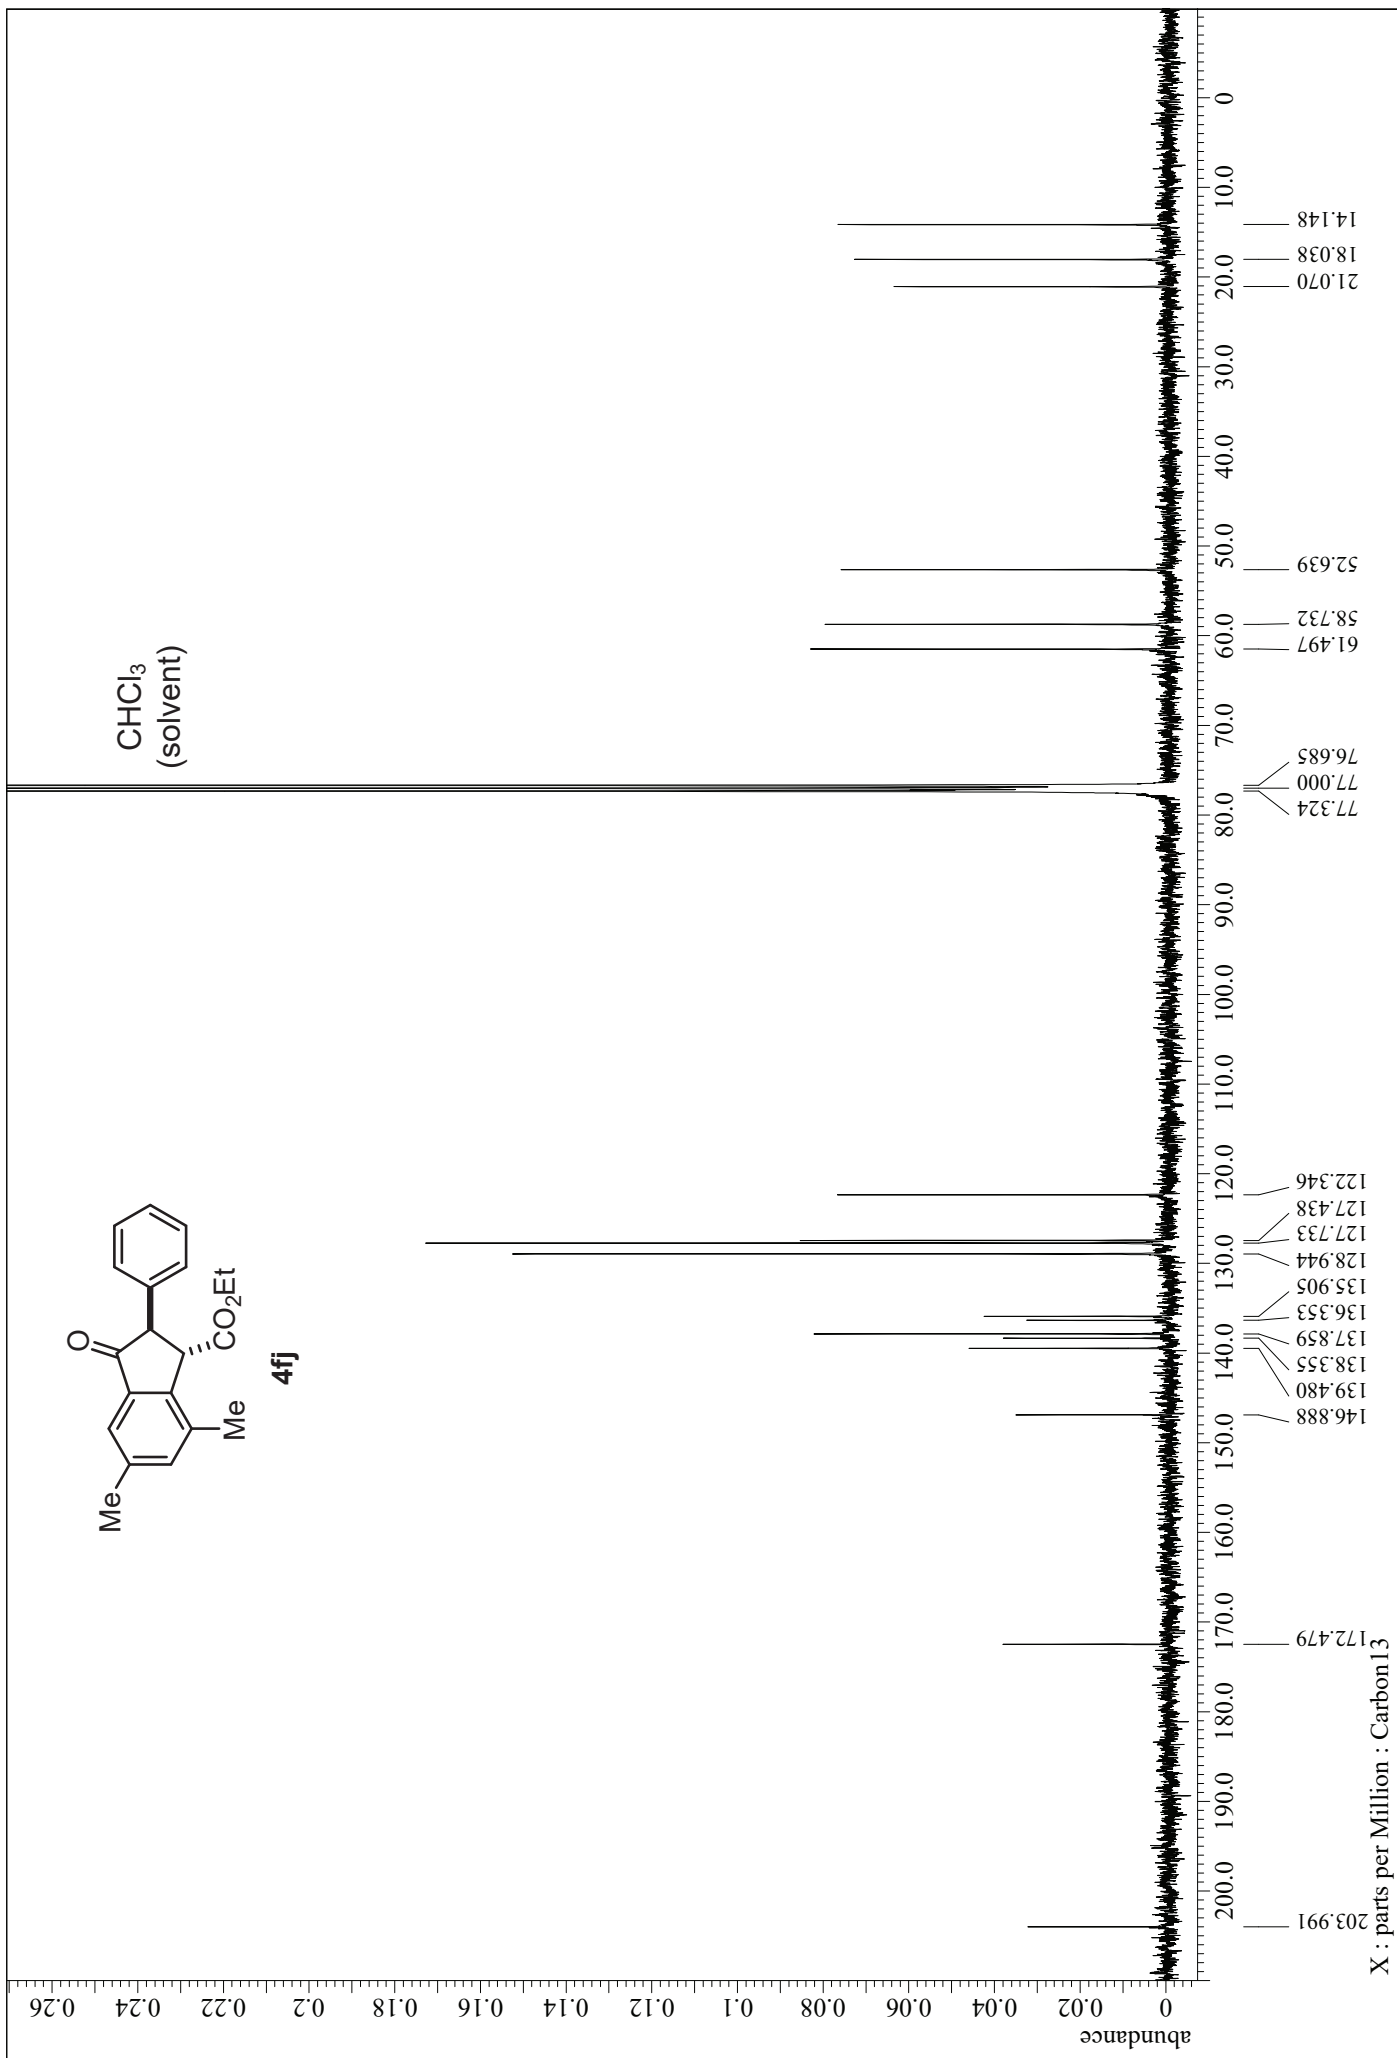

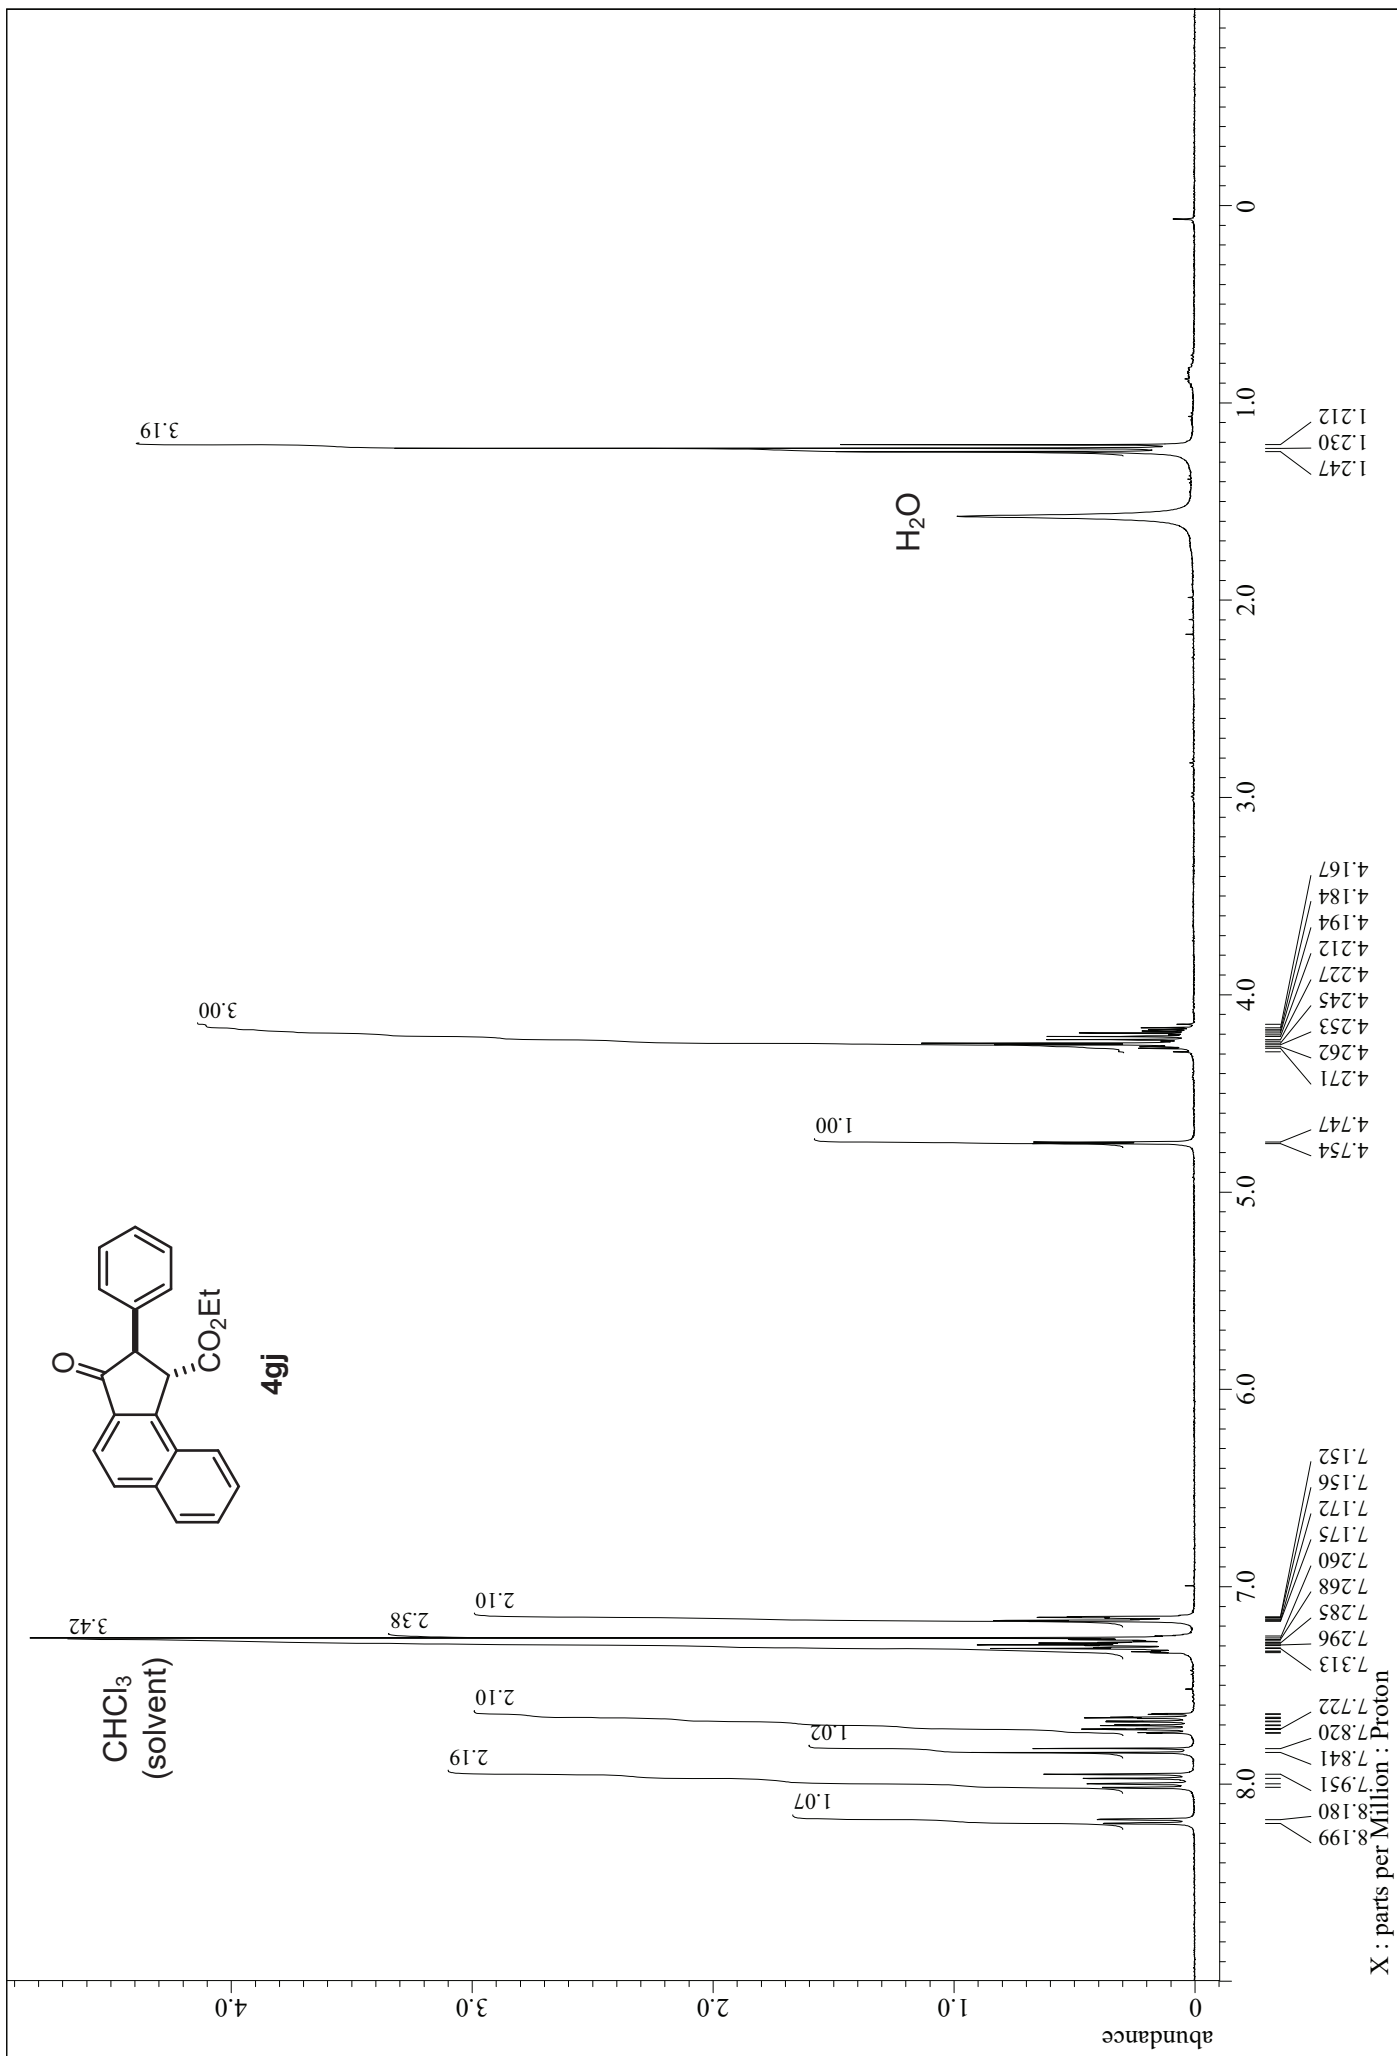

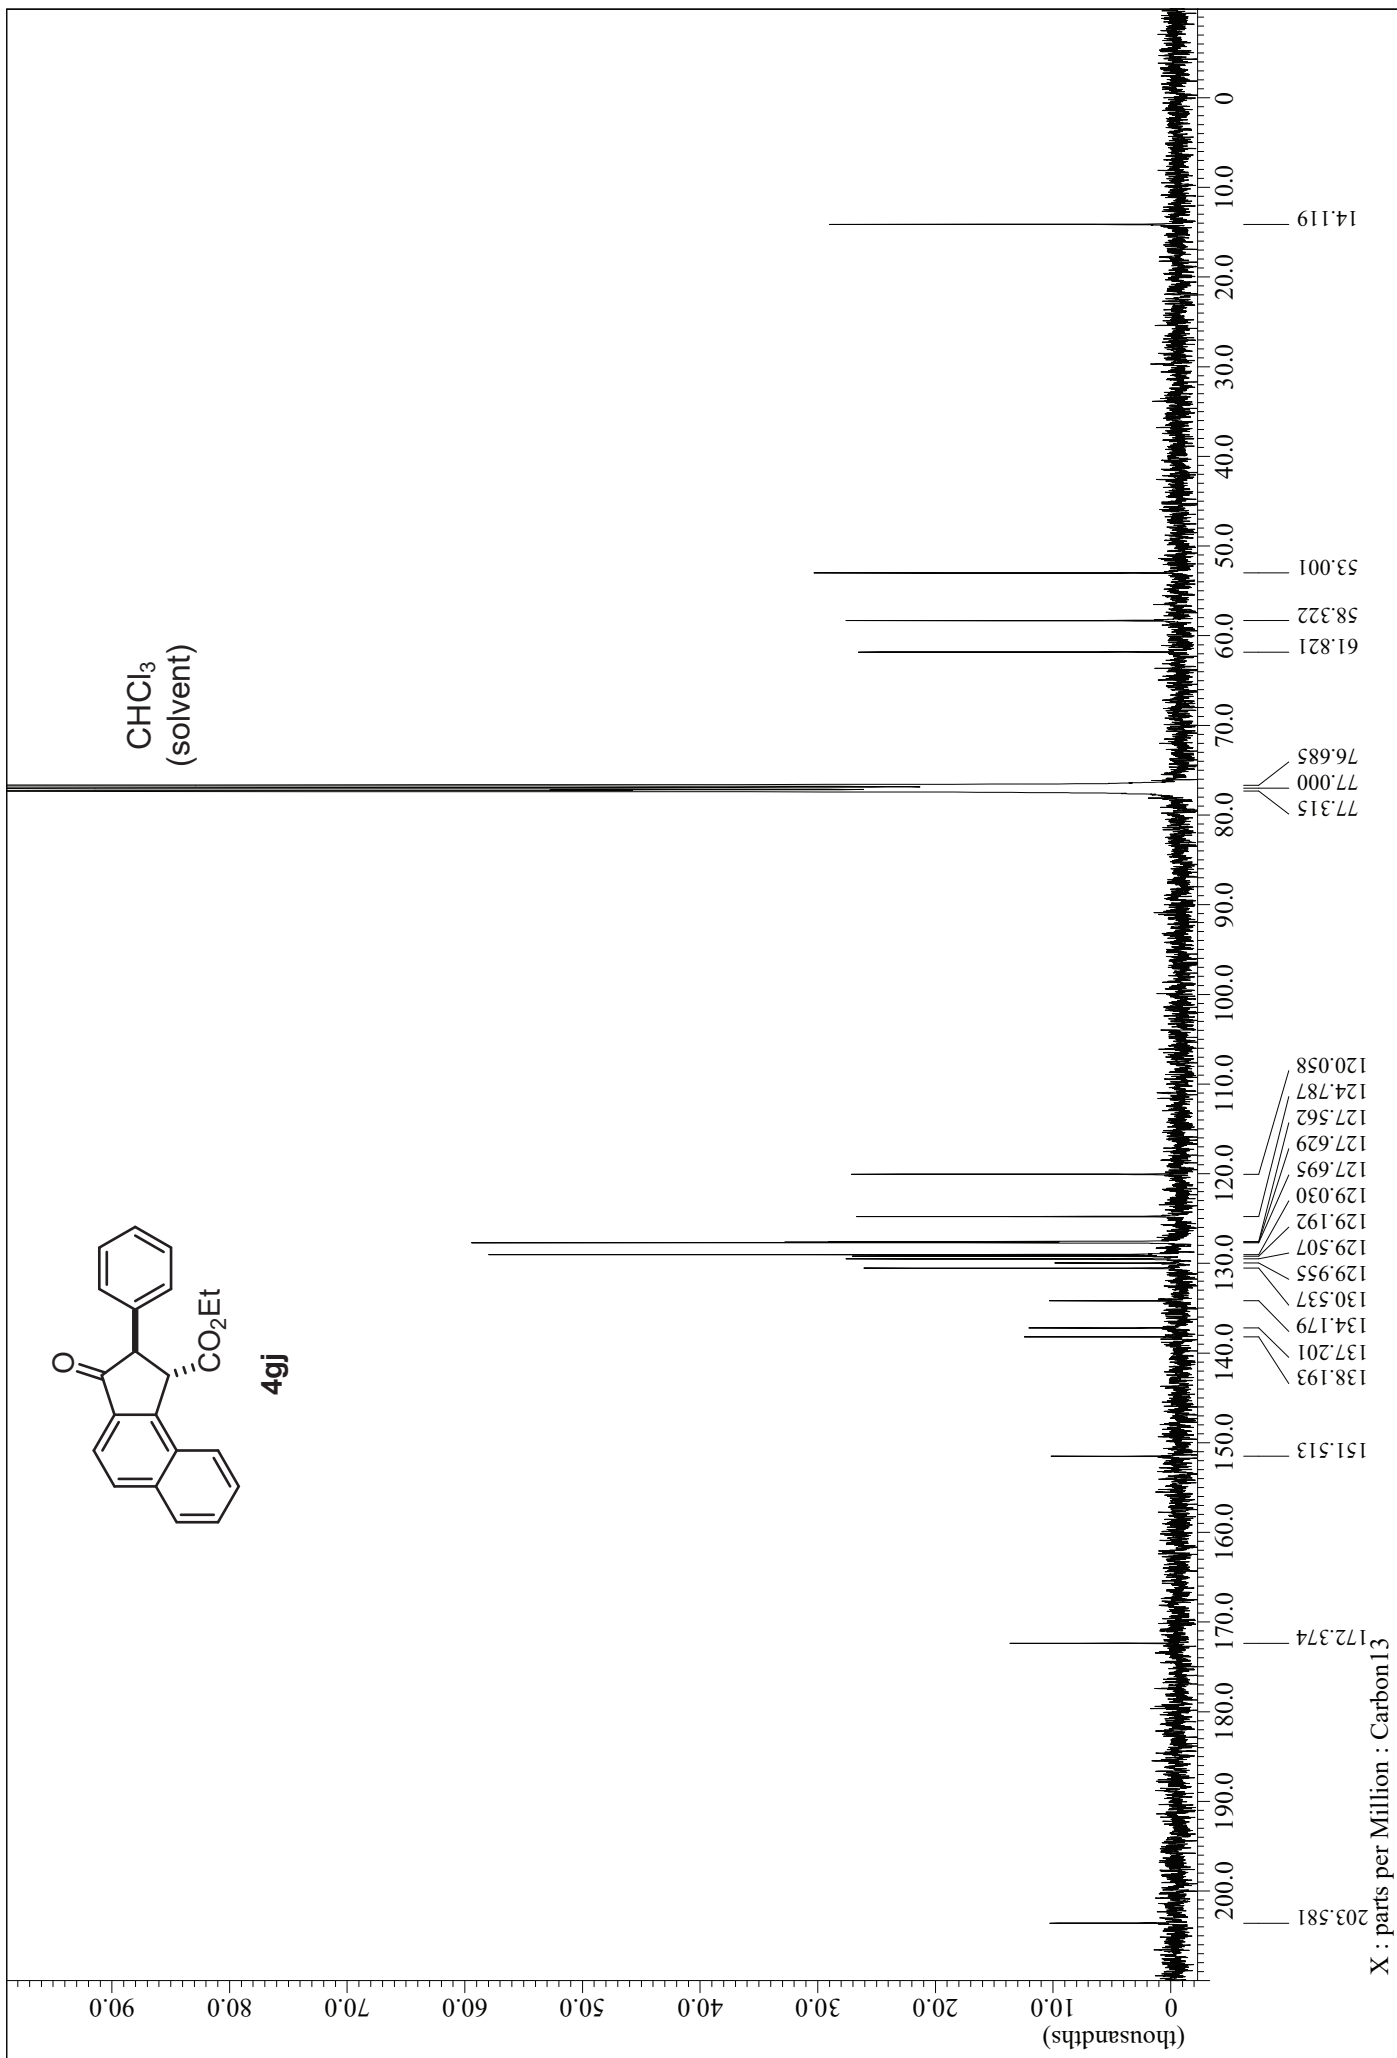

Supplement: d3sc00181d1.pdf [file d3sc00181d1.pdf]
